# Supplementary material for: World guidelines for falls prevention and management for older adults: a global initiative
Source: PubMed Central journal article supplement — Age Ageing. 2022 Sep 30;51(9):afac205. doi: 10.1093/ageing/afac205 (PMC9523684; doi:10.1093/ageing/afac205), 2022-09-30
Supplement: appendix3_evidence_to_action_tables_afac205.pdf [file appendix3_evidence_to_action_tables_afac205.pdf]

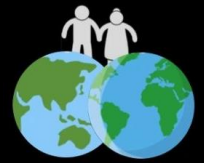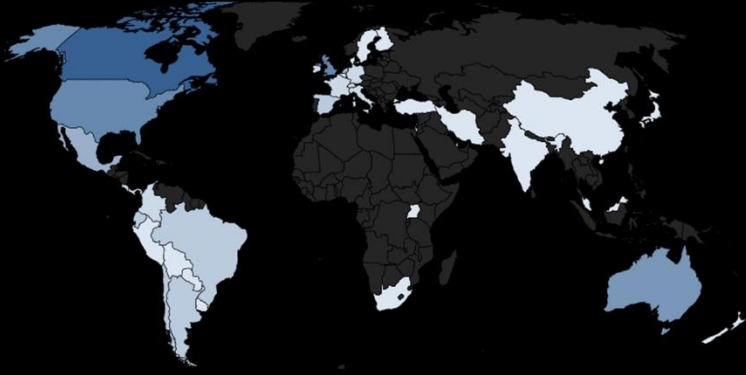

## **Appendix 3**

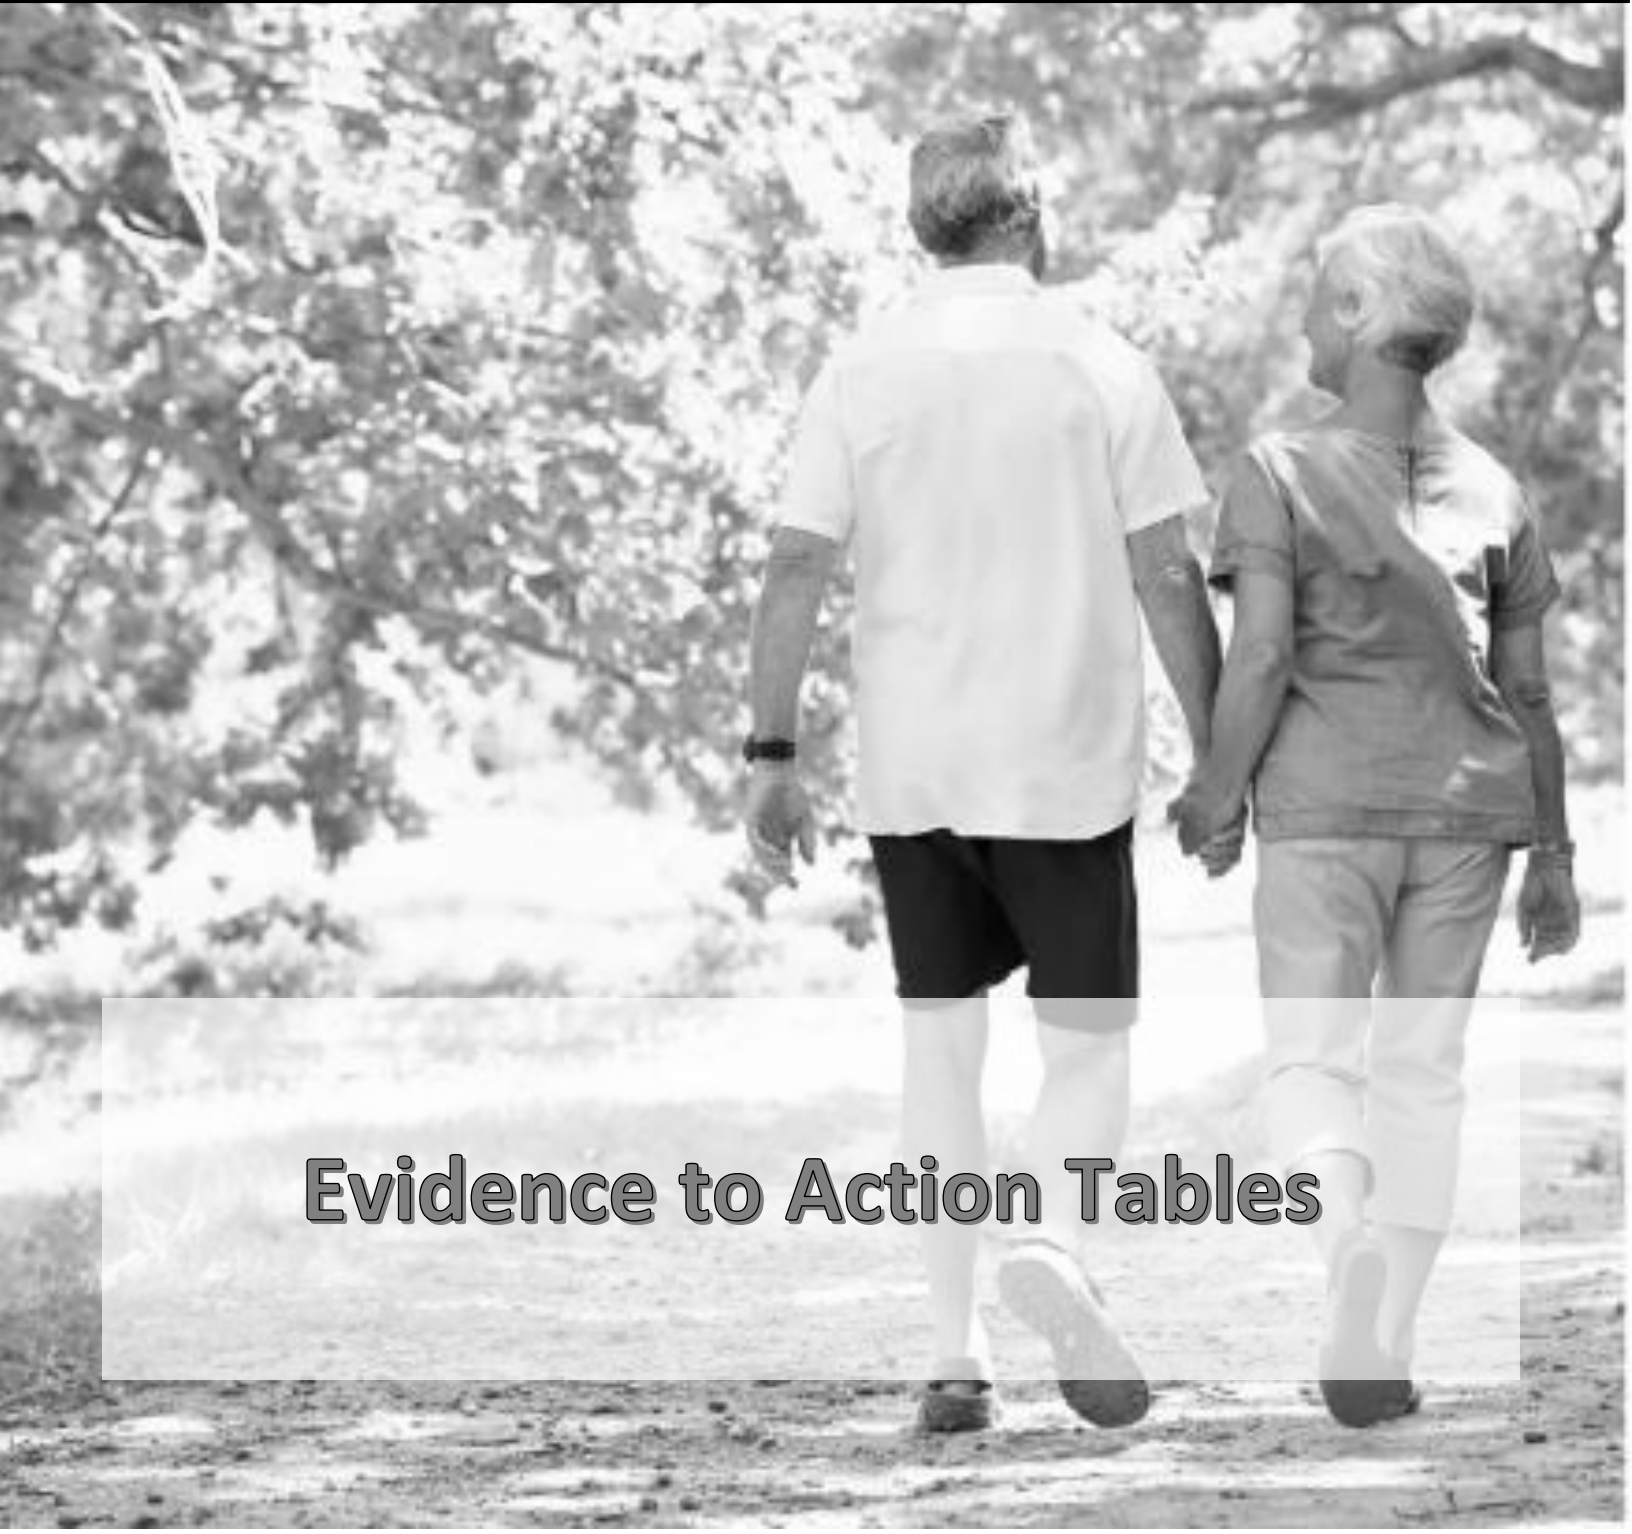

**Evidence to Action Tables**

## Working group 1: Assessment and Risk Factors

### Recommendations for Working Group 1: Gait and balance assessments tools to assess risk for falls

**Recommendation 1 (Stratification).** We recommend including Gait Speed for predicting falls risk.

**GRADE: 1A**

As an alternative the Timed Up and Go Test can be considered, although the evidence for fall prediction is less consistent. **GRADE: 1B**

**Recommendation 2 (Assessment).** We recommend that Gait and Balance should be assessed as part of the risk assessment of falls. **GRADE: 1B**

| <i>Population:</i>             | Older adults                    | <i>Objective:</i> To make an evidence-based recommendation through critical appraisal of the existing evidence (umbrella review) on assessments of gait and balance to predict falls in older people. |                   |                                         |
|--------------------------------|---------------------------------|-------------------------------------------------------------------------------------------------------------------------------------------------------------------------------------------------------|-------------------|-----------------------------------------|
| <i>Intervention:</i>           | Gait and balance assessments    |                                                                                                                                                                                                       |                   |                                         |
| <i>Comparison:</i>             | Usual care                      |                                                                                                                                                                                                       |                   |                                         |
| <i>Main outcomes:</i>          | Falls, falls risk               |                                                                                                                                                                                                       |                   |                                         |
| <i>Setting:</i>                | Community-dwelling older adults |                                                                                                                                                                                                       |                   |                                         |
| <i>Perspective:</i>            | Population                      |                                                                                                                                                                                                       |                   |                                         |
| Decision Domain                |                                 | Judgements                                                                                                                                                                                            | Research Evidence | Additional Considerations /Explanations |
| <b>Priority of the Problem</b> | Is the problem a priority?      | <ul style="list-style-type: none"> <li>○ No</li> <li>○ Probably no</li> <li>○ Uncertain</li> <li>○ Probably yes</li> <li>● <b>Yes</b></li> <li>○ Varies</li> </ul>                                    |                   |                                         |

|                                                 |                                                                                                                                              |                                                                                                                                                                                                                                                                                                         |                                                              |                            |                                          |       |
|-------------------------------------------------|----------------------------------------------------------------------------------------------------------------------------------------------|---------------------------------------------------------------------------------------------------------------------------------------------------------------------------------------------------------------------------------------------------------------------------------------------------------|--------------------------------------------------------------|----------------------------|------------------------------------------|-------|
| <b>Benefits and harms</b><br>(see below)        | Is there important uncertainty or variability in how much patients, researchers, clinicians and stake holders value the main outcomes?       | <ul style="list-style-type: none"> <li>○ Important uncertainty or variability</li> <li>○ Possibly important uncertainty or variability</li> <li>● <b>Probably no important uncertainty of variability</b></li> <li>○ No important uncertainty of variability</li> <li>○ No known undesirable</li> </ul> | <i>Relative importance of the main outcomes of interest:</i> |                            |                                          | None. |
|                                                 |                                                                                                                                              |                                                                                                                                                                                                                                                                                                         | <b>Outcome</b>                                               | <b>Relative Importance</b> | <b>Certainty of the evidence (GRADE)</b> |       |
|                                                 |                                                                                                                                              |                                                                                                                                                                                                                                                                                                         | Falls                                                        | Critical                   | ⊕⊕⊕○<br>MODERATE                         |       |
|                                                 |                                                                                                                                              |                                                                                                                                                                                                                                                                                                         | Fall risk                                                    | Critical                   | ⊕⊕⊕○<br>MODERATE                         |       |
|                                                 |                                                                                                                                              |                                                                                                                                                                                                                                                                                                         |                                                              |                            | ○○○○<br>MODERATE                         |       |
|                                                 |                                                                                                                                              |                                                                                                                                                                                                                                                                                                         |                                                              |                            | ○○○○<br>MODERATE                         |       |
|                                                 |                                                                                                                                              |                                                                                                                                                                                                                                                                                                         |                                                              |                            | ○○○○<br>MODERATE                         |       |
|                                                 |                                                                                                                                              |                                                                                                                                                                                                                                                                                                         |                                                              |                            | ○○○○<br>MODERATE                         |       |
|                                                 |                                                                                                                                              |                                                                                                                                                                                                                                                                                                         |                                                              |                            | ○○○○<br>MODERATE                         |       |
|                                                 |                                                                                                                                              |                                                                                                                                                                                                                                                                                                         |                                                              |                            | ○○○○<br>MODERATE                         |       |
| What is the overall certainty of this evidence? | <ul style="list-style-type: none"> <li>○ No studies</li> <li>○ Very low</li> <li>○ Low</li> <li>● <b>Moderate</b></li> <li>○ High</li> </ul> |                                                                                                                                                                                                                                                                                                         |                                                              |                            |                                          |       |

|                                                                                                         |                                                                                                                                                                                                                                                |                                                                    |                                                 |                              |                                                                                                  |                           |
|---------------------------------------------------------------------------------------------------------|------------------------------------------------------------------------------------------------------------------------------------------------------------------------------------------------------------------------------------------------|--------------------------------------------------------------------|-------------------------------------------------|------------------------------|--------------------------------------------------------------------------------------------------|---------------------------|
| How substantial are the desirable anticipated effects of the intervention?                              | <ul style="list-style-type: none"> <li>○ Large</li> <li>● <b>Moderate</b></li> <li>○ Small</li> <li>○ Trivial</li> <li>○ Varies</li> <li>○ Don't know</li> </ul>                                                                               | <b>Summary of findings (GRADE):</b>                                |                                                 |                              | OR and RR not provided for each outcome<br><br>Those studies were cited from the umbrella review |                           |
| How substantial are the undesirable anticipated effects of the intervention?                            | <ul style="list-style-type: none"> <li>● <b>Trivial</b></li> <li>○ Small</li> <li>○ Moderate</li> <li>○ Large</li> <li>○ Varies</li> <li>○ Don't know</li> </ul>                                                                               | <b>Outcome</b>                                                     | <b>Nº of patients</b>                           |                              |                                                                                                  | <b>Effect</b>             |
| Does the balance between desirable effects and undesirable effects favour the option of the comparison? | <ul style="list-style-type: none"> <li>○ Favours the option</li> <li>● Probably favours the option</li> <li>○ Does not favour either</li> <li>○ Probably favours the comparison</li> <li>○ Favours the comparison</li> <li>○ Varies</li> </ul> |                                                                    | <b>Intervention</b>                             | <b>Control</b>               | <b>Relative / Absolute (95% CI)</b>                                                              | DOR=Diagnostic odds ratio |
|                                                                                                         |                                                                                                                                                                                                                                                | Gait Speed (GS) <sup>2</sup>                                       | N=1517                                          | Highest vs lowest gait speed | RR: 0.23 (0.11-0.5)                                                                              |                           |
|                                                                                                         |                                                                                                                                                                                                                                                | Gait speed (Fractures) <sup>2</sup>                                | N=7575                                          | Highest vs lowest gait speed | RR: 1.4 (1.1-1.6)                                                                                |                           |
|                                                                                                         |                                                                                                                                                                                                                                                | Timed Up and Go (TUG) [Park <sup>12</sup> ] [Barry <sup>10</sup> ] | N=427 <sup>12</sup><br><br>N=2314 <sup>10</sup> |                              | DOR: 3.99 (1.51 – 10.51) <sup>12</sup><br>OR: 1.01 (1.00 – 1.02) <sup>10</sup>                   |                           |
|                                                                                                         |                                                                                                                                                                                                                                                | Berg Balance Scale (BBS) [Park <sup>12</sup> ]                     | N=570                                           |                              | DOR: 29.73 (7.81 – 113.17)                                                                       |                           |
|                                                                                                         |                                                                                                                                                                                                                                                | Chair Stand Test (CST)                                             |                                                 |                              | * No RR or OR calculated for this test                                                           |                           |
|                                                                                                         |                                                                                                                                                                                                                                                | One Leg Stance (OLS)                                               |                                                 |                              | * No RR or OR calculated for this test                                                           |                           |
|                                                                                                         |                                                                                                                                                                                                                                                | Functional Reach Test (FR)                                         |                                                 |                              | * No RR or OR calculated for this test                                                           |                           |

|  |  |  |                                                                       |                           |  |                                                                                                                                                                                      |  |
|--|--|--|-----------------------------------------------------------------------|---------------------------|--|--------------------------------------------------------------------------------------------------------------------------------------------------------------------------------------|--|
|  |  |  |                                                                       |                           |  |                                                                                                                                                                                      |  |
|  |  |  | <p>Dual Task<br/>(DT)<br/>Assessments<br/>[Beauchet<sup>21</sup>]</p> | <p>N=15<br/>(studies)</p> |  | <p>Retrospective studies<br/>Pooled OR: 1.62<br/>(0.96 – 2.72)<br/>Prospective studies<br/>Pooled OR: 6.84 (3.06<br/>– 15.28)<br/>All studies<br/>Pooled OR: 5.3<br/>(3.1 – 9.1)</p> |  |

|                                                                                                    |                                                                                                                                                                                        |                                                                                                                                                                                                                                                                                                                                                                                                                                    |                                                      |  |
|----------------------------------------------------------------------------------------------------|----------------------------------------------------------------------------------------------------------------------------------------------------------------------------------------|------------------------------------------------------------------------------------------------------------------------------------------------------------------------------------------------------------------------------------------------------------------------------------------------------------------------------------------------------------------------------------------------------------------------------------|------------------------------------------------------|--|
| <p style="writing-mode: vertical-rl; transform: rotate(180deg);"><b>Values and preferences</b></p> | <p>Is there similarity about how much patients, researchers, clinicians and stake holders value the main Outcomes?<br/>Also include adverse effects and burden of the intervention</p> | <ul style="list-style-type: none"> <li><input type="radio"/> No</li> <li><input type="radio"/> Probably no</li> <li><input type="radio"/> Uncertain</li> <li><input checked="" type="radio"/> <b>Probably yes</b></li> <li><input type="radio"/> Yes</li> <li><input type="radio"/> Varies</li> </ul>                                                                                                                              |                                                      |  |
| <p style="writing-mode: vertical-rl; transform: rotate(180deg);"><b>Resources</b></p>              | <p>What is the certainty of the evidence of resources requirements (costs)?</p>                                                                                                        | <ul style="list-style-type: none"> <li><input checked="" type="radio"/> <b>No studies</b></li> <li><input type="radio"/> Very low</li> <li><input type="radio"/> Low</li> <li><input type="radio"/> Moderate</li> <li><input type="radio"/> High</li> </ul>                                                                                                                                                                        | <p>No studies outlining cost of the intervention</p> |  |
|                                                                                                    | <p>Does the cost effectiveness favour the intervention or the comparison?</p>                                                                                                          | <ul style="list-style-type: none"> <li><input type="radio"/> Favours the option</li> <li><input type="radio"/> Probably favours the option</li> <li><input type="radio"/> Does not favour either</li> <li><input type="radio"/> Probably favours the comparison</li> <li><input type="radio"/> Favours the comparison</li> <li><input type="radio"/> Varies</li> <li><input checked="" type="radio"/> <b>No studies</b></li> </ul> | <p>No studies outlining cost of the intervention</p> |  |

|               |                                               |                                                                                                                                                                                                                                                                                                                             |  |  |
|---------------|-----------------------------------------------|-----------------------------------------------------------------------------------------------------------------------------------------------------------------------------------------------------------------------------------------------------------------------------------------------------------------------------|--|--|
| Equity        | What would be the impact on health equity?    | <ul style="list-style-type: none"> <li><input type="radio"/> Increased</li> <li><input type="radio"/> Probably increased</li> <li><input checked="" type="radio"/> <b>Uncertain</b></li> <li><input type="radio"/> Probably reduced</li> <li><input type="radio"/> Reduced</li> <li><input type="radio"/> Varies</li> </ul> |  |  |
| Acceptability | Is the option acceptable to key stakeholders? | <ul style="list-style-type: none"> <li><input type="radio"/> No</li> <li><input type="radio"/> Probably no</li> <li><input type="radio"/> Uncertain</li> <li><input checked="" type="radio"/> <b>Probably yes</b></li> <li><input type="radio"/> Yes</li> <li><input type="radio"/> Varies</li> </ul>                       |  |  |

|             |                                            |                                                                                                                                                                                                                                                                                                       |  |  |
|-------------|--------------------------------------------|-------------------------------------------------------------------------------------------------------------------------------------------------------------------------------------------------------------------------------------------------------------------------------------------------------|--|--|
| Feasibility | Is the intervention feasible to implement? | <ul style="list-style-type: none"> <li><input type="radio"/> No</li> <li><input type="radio"/> Probably no</li> <li><input type="radio"/> Uncertain</li> <li><input checked="" type="radio"/> <b>Probably yes</b></li> <li><input type="radio"/> Yes</li> <li><input type="radio"/> Varies</li> </ul> |  |  |
|-------------|--------------------------------------------|-------------------------------------------------------------------------------------------------------------------------------------------------------------------------------------------------------------------------------------------------------------------------------------------------------|--|--|

**Should \_\_\_ be recommended for older adults to prevent and manage falls?**

| Type of recommendation        | Strong recommendation against the intervention<br><input type="radio"/>                                                                                                                                                                                                                                                                                                                                                                                                                                                                                                                                                                                                                                                                                                                                                                                                                                             | Weak recommendation against the intervention<br><input type="radio"/> | Conditional recommendation for either the intervention or the comparison<br><input type="radio"/> | Weak recommendation for the intervention<br><input type="radio"/> | Strong recommendation for the intervention<br><input checked="" type="radio"/> |
|-------------------------------|---------------------------------------------------------------------------------------------------------------------------------------------------------------------------------------------------------------------------------------------------------------------------------------------------------------------------------------------------------------------------------------------------------------------------------------------------------------------------------------------------------------------------------------------------------------------------------------------------------------------------------------------------------------------------------------------------------------------------------------------------------------------------------------------------------------------------------------------------------------------------------------------------------------------|-----------------------------------------------------------------------|---------------------------------------------------------------------------------------------------|-------------------------------------------------------------------|--------------------------------------------------------------------------------|
| Recommendation                | Recommendation 1. We recommend including Gait Speed (GS) for predicting falls risk. GRADE: 1A<br>As an alternative the Timed Up and Go Test can be considered, although the evidence for fall prediction is less consistent. GRADE: 1B<br>Recommendation 2. We recommend that Gait and Balance should be assessed as part of the risk assessment of falls. GRADE: 1B                                                                                                                                                                                                                                                                                                                                                                                                                                                                                                                                                |                                                                       |                                                                                                   |                                                                   |                                                                                |
| Justification                 | Evidence for this recommendation has emerged from a review of the literature, with specifically an umbrella review of the available evidence. <sup>10</sup>                                                                                                                                                                                                                                                                                                                                                                                                                                                                                                                                                                                                                                                                                                                                                         |                                                                       |                                                                                                   |                                                                   |                                                                                |
| Subgroup considerations       | GS is an important measure in the comprehensive geriatric assessment, within all clinical settings, for predicting falls and for the purposes of developing risk profiles for older patients. <sup>23</sup> There is some evidence, from one subgroup analysis, that the TUG may have a role in fall prediction for older adults with lower function. <sup>24</sup> One review reported that the BBS may predict falls in a stroke clinic population. <sup>25</sup> One review reported that the FR may predict falls in older adults with cognitive impairment. <sup>22</sup> There is well-established evidence indicating that dual task gait (slowing speed or higher dual task cost) has the ability to predict dementia; <sup>26</sup> similarly, the best available evidence suggested that dual task testing can predict falls, although the optimal type of dual task test is still unclear. <sup>10</sup> |                                                                       |                                                                                                   |                                                                   |                                                                                |
| Implementation considerations | GS is a suitable test that can easily be implemented in the standard clinical evaluation of older adults, <sup>1</sup> due to its ease and efficiency of administration, low cost, and reliability. GS can also predict other important health-related outcomes. <sup>2,27,28</sup> Positive results have been found for a 4-meter gait speed assessment, which is also the recommended length of measurement in a systematic review from the IANA task force, which reported that gait speed was a strong and consistent predictor of adverse outcomes in community-dwelling older adults. <sup>2</sup>                                                                                                                                                                                                                                                                                                            |                                                                       |                                                                                                   |                                                                   |                                                                                |
| Monitoring and evaluation     | For monitoring the effectiveness of interventions to reduce falls, it is important to use the established minimal level of change of the assessments, and consideration should be given to clinical meaningful changes.                                                                                                                                                                                                                                                                                                                                                                                                                                                                                                                                                                                                                                                                                             |                                                                       |                                                                                                   |                                                                   |                                                                                |
| Research Priorities           | 1. Further research is needed to evaluate how different tools combining balance and physical functional assessment like the Short Physical Battery (SPPB) can predict falls and be clinically applied. The SPPB is increasingly being used in clinical and research settings; however the umbrella review was unable to determine its predictive ability, as it was not reported in the included reviews. <sup>10</sup>                                                                                                                                                                                                                                                                                                                                                                                                                                                                                             |                                                                       |                                                                                                   |                                                                   |                                                                                |



2. Current evidence shows that DT assessment has the ability to predict falls; however future research defining the optimal DT protocol with regards to fall prediction is still warranted.
3. The combination of the best assessment tools needs to be defined for different settings (e.g., community, outpatient clinic, acute care, long term care), specific clinical characteristics of the older adult (e.g., cognitive impairment, stroke, Parkinson's disease), different levels of functional status, and different levels of frailty.
4. There is increasing interest and research on developing fall prediction models, which combine data from different domains to calculate falls risk. Research focusing on a combination of different fall risk factors in these prediction models is warranted.<sup>29,30</sup>
5. Future fall prediction research should focus on feasibility and cost-effectiveness of assessments.
6. Future fall prediction research should also include patient and public involvement. The development and implementation of relevant assessment tools should take into account patients' and public values and preferences.

## References

1. Guralnik JM, Ferrucci L, Pieper CF, Leveille SG, Markides KS, Ostir GV, et al. Lower extremity function and subsequent disability: consistency across studies, predictive models, and value of gait speed alone compared with the short physical performance battery. *J Gerontol A Biol Sci Med Sci*. 2000 Apr;55(4):M221-31.
2. Abellan van Kan G, Rolland Y, Andrieu S, Bauer J, Beauchet O, Bonnefoy M, et al. Gait speed at usual pace as a predictor of adverse outcomes in community-dwelling older people an International Academy on Nutrition and Aging (IANA) Task Force. *J Nutr Health Aging*. 2009 Dec;13(10):881-9.
3. National Institute for Health and Care Excellence (NICE). 2019 surveillance of falls in older people: assessing risk and prevention (NICE guideline CG161). London: National Institute for Health and Care Excellence; 2019.
4. Force USPST, Grossman DC, Curry SJ, Owens DK, Barry MJ, Caughey AB, et al. Interventions to Prevent Falls in Community-Dwelling Older Adults: US Preventive Services Task Force Recommendation Statement. *JAMA*. 2018 Apr 24;319(16):1696-704.
5. Panel on Prevention of Falls in Older Persons, American Geriatrics Society and British Geriatrics Society. Summary of the Updated American Geriatrics Society/British Geriatrics Society clinical practice guideline for prevention of falls in older persons. *J Am Geriatr Soc*. 2011 Jan;59(1):148-57.
6. Montero-Odasso MM, Kamkar N, Pieruccini-Faria F, Osman A, Sarquis-Adamson Y, Close J, et al. Evaluation of Clinical Practice Guidelines on Fall Prevention and Management for Older Adults: A Systematic Review. *JAMA Netw Open*. 2021 Dec 1;4(12):e2138911.
7. Montero-Odasso M, van der Velde N, Alexander NB, Becker C, Blain H, Camicioli R, et al. New horizons in falls prevention and management for older adults: a global initiative. *Age Ageing*. 2021 Sep 11;50(5):1499-507.
8. Gillespie LD, Robertson MC, Gillespie WJ, Sherrington C, Gates S, Clemson LM, et al. Interventions for preventing falls in older people living in the community. *Cochrane Database Syst Rev*. 2012 Sep 12(9):CD007146.
9. Lang JT, Kassin TO, Devaney LL, Colon-Semenza C, Joseph MF. Test-Retest Reliability and Minimal Detectable Change for the 10-Meter Walk Test in Older Adults With Parkinson's disease. *J Geriatr Phys Ther*. 2016 Oct-Dec;39(4):165-70.
10. Beck Jepsen D, Robinson K, Ogliaeri G, Montero-Odasso M, Kamkar N, Ryg J, et al. Predicting falls in older adults: an umbrella review of instruments assessing gait, balance, and functional mobility. *BMC Geriatr*. 2022 Jul 25;22(1):615.
11. Podsiadlo D, Richardson S. The timed "Up & Go": a test of basic functional mobility for frail elderly persons. *J Am Geriatr Soc*. 1991 Feb;39(2):142-8.
12. Berg KO, Wood-Dauphinee SL, Williams JI, Maki B. Measuring balance in the elderly: validation of an instrument. *Can J Public Health*. 1992 Jul-Aug;83 Suppl 2:S7-11.
13. Lima CA, Ricci NA, Nogueira EC, Perracini MR. The Berg Balance Scale as a clinical screening tool to predict fall risk in older adults: a systematic review. *Physiotherapy*. 2018 Dec;104(4):383-94.
14. Muir SW, Berg K, Chesworth B, Klar N, Speechley M. Quantifying the magnitude of risk for balance impairment on falls in community-dwelling older adults: a systematic review and meta-analysis. *J Clin Epidemiol*. 2010 Apr;63(4):389-406.
15. Bohannon R. Single limb stance times: a descriptive meta-analysis of data from individuals at least 60 years of age. *Topics Geriatr Rehab*. 2006;22(1):70-7.
16. Weiner DK, Duncan PW, Chandler J, Studenski SA. Functional reach: a marker of physical frailty. *J Am Geriatr Soc*. 1992 Mar;40(3):203-7.
17. Bandinelli S, Pozzi M, Lauretani F, Phillips C, Shumway-Cook A, Guralnik JM, et al. Adding challenge to performance-based tests of walking: The Walking InCHIANTI Toolkit (WIT). *Am J Phys Med Rehabil*. 2006 Dec;85(12):986-91.
18. Lusardi MM, Fritz S, Middleton A, Allison L, Wingood M, Phillips E, et al. Determining Risk of Falls in Community Dwelling Older Adults: A Systematic Review and Meta-analysis Using Posttest Probability. *J Geriatr Phys Ther*. 2017 Jan/Mar;40(1):1-36.
19. Payette MC, Belanger C, Leveille V, Grenier S. Fall-Related Psychological Concerns and Anxiety among Community-Dwelling Older Adults: Systematic Review and Meta-Analysis. *PLoS One*. 2016;11(4):e0152848.
20. Hughes CC, Kneebone, II, Jones F, Brady B. A theoretical and empirical review of psychological factors associated with falls-related psychological concerns in community-dwelling older people. *Int Psychogeriatr*. 2015 Jul;27(7):1071-87.
21. Adamczewska N, Nyman SR. A New Approach to Fear of Falls From Connections With the Posttraumatic Stress Disorder Literature. *Gerontol Geriatr Med*. 2018 Jan-Dec;4:2333721418796238.

22. Dolatabadi E, Van Ooteghem K, Taati B, Iaboni A. Quantitative Mobility Assessment for Fall Risk Prediction in Dementia: A Systematic Review. *Dement Geriatr Cogn Disord*. 2018;45(5-6):353-67.
23. Cesari M. Role of gait speed in the assessment of older patients. *JAMA*. 2011 Jan 5;305(1):93-4.
24. Schoene D, Wu SM, Mikolaizak AS, Menant JC, Smith ST, Delbaere K, et al. Discriminative ability and predictive validity of the timed up and go test in identifying older people who fall: systematic review and meta-analysis. *J Am Geriatr Soc*. 2013 Feb;61(2):202-8.
25. Lee J, Geller AI, Strasser DC. Analytical review: focus on fall screening assessments. *PM R*. 2013 Jul;5(7):609-21.
26. Montero-Odasso M, Pieruccini-Faria F, Ismail Z, Li K, Lim A, Phillips N, et al. CCCDTD5 recommendations on early non cognitive markers of dementia: A Canadian consensus. *Alzheimers Dement (N Y)*. 2020;6(1):e12068.
27. Cesari M, Kritchevsky SB, Penninx BW, Nicklas BJ, Simonsick EM, Newman AB, et al. Prognostic value of usual gait speed in well-functioning older people--results from the Health, Aging and Body Composition Study. *J Am Geriatr Soc*. 2005 Oct;53(10):1675-80.
28. Fritz S, Lusardi M. White paper: "walking speed: the sixth vital sign". *J Geriatr Phys Ther*. 2009;32(2):46-9.
29. Gade GV, Jorgensen MG, Ryg J, Masud T, Jakobsen LH, Andersen S. Development of a multivariable prognostic PREDiction model for 1-year risk of FALLing in a cohort of community-dwelling older adults aged 75 years and above (PREFALL). *BMC Geriatr*. 2021 Jun 30;21(1):402.
30. Dormosh N, Schut MC, Heymans MW, van der Velde N, Abu-Hanna A. Development and Internal Validation of a Risk Prediction Model for Falls Among Older People Using Primary Care Electronic Health Records. *J Gerontol A Biol Sci Med Sci*. 2022 Jul 5;77(7):1438-45.

## Working Group 2: Polypharmacy, Fall Risk Increasing Drugs, and Falls

### Recommendations for Working Group 2: Polypharmacy, Fall Risk Increasing Drugs, and Falls

**Recommendation 1 (Assessment): We recommend assessing for fall history and the risk of falls before prescribing potential fall risk increasing drugs (FRIDs) to older adults. GRADE: 1B**

| <b>Population:</b>             | Older adults aged $\geq 65$ years                                       | <i>Objective: Adults of 65 years and older have an increased risk of falls. Several central nervous system (CNS) drugs and cardiovascular drugs are strongly associated with an increased risk of falls in older adults. A pragmatic prevention approach to prevent falls is to identify older adults at risk for falls and try to find a treatment option that is safer than FRID, available and clinically suitable for older adults. The objective was to summarize the literature regarding FRIDs as risk factors for falling.</i> |                                      |                                         |
|--------------------------------|-------------------------------------------------------------------------|----------------------------------------------------------------------------------------------------------------------------------------------------------------------------------------------------------------------------------------------------------------------------------------------------------------------------------------------------------------------------------------------------------------------------------------------------------------------------------------------------------------------------------------|--------------------------------------|-----------------------------------------|
| <b>Intervention:</b>           | Assessment of fall history and fall risk prior to prescription of FRIDs |                                                                                                                                                                                                                                                                                                                                                                                                                                                                                                                                        |                                      |                                         |
| <b>Comparison:</b>             | Prescription of FRIDs, (non)-pharmacological option for treatment       |                                                                                                                                                                                                                                                                                                                                                                                                                                                                                                                                        |                                      |                                         |
| <b>Main outcomes:</b>          | Falls                                                                   |                                                                                                                                                                                                                                                                                                                                                                                                                                                                                                                                        |                                      |                                         |
| <b>Setting:</b>                | Any setting                                                             |                                                                                                                                                                                                                                                                                                                                                                                                                                                                                                                                        |                                      |                                         |
| <b>Perspective:</b>            | Population                                                              |                                                                                                                                                                                                                                                                                                                                                                                                                                                                                                                                        |                                      |                                         |
| Decision Domain                |                                                                         | Judgements                                                                                                                                                                                                                                                                                                                                                                                                                                                                                                                             | Research Evidence                    | Additional Considerations /Explanations |
| <b>Priority of the Problem</b> | Is the problem a priority?                                              | <ul style="list-style-type: none"> <li>○ No</li> <li>○ Probably no</li> <li>○ Uncertain</li> <li>○ Probably yes</li> <li>● <b>Yes</b></li> <li>○ Varies</li> </ul>                                                                                                                                                                                                                                                                                                                                                                     | See 'Overview of the Problem' above. |                                         |

|                                                 |                                                                                                                                              |                                                                                                                                                                                                                                                                                                         |                                                              |                            |                                          |       |
|-------------------------------------------------|----------------------------------------------------------------------------------------------------------------------------------------------|---------------------------------------------------------------------------------------------------------------------------------------------------------------------------------------------------------------------------------------------------------------------------------------------------------|--------------------------------------------------------------|----------------------------|------------------------------------------|-------|
| <b>Benefits and harms</b><br>(see below)        | Is there important uncertainty or variability in how much patients, researchers, clinicians and stake holders value the main outcomes?       | <ul style="list-style-type: none"> <li>○ Important uncertainty or variability</li> <li>○ Possibly important uncertainty or variability</li> <li>● <b>Probably no important uncertainty of variability</b></li> <li>○ No important uncertainty of variability</li> <li>○ No known undesirable</li> </ul> | <i>Relative importance of the main outcomes of interest:</i> |                            |                                          | None. |
|                                                 |                                                                                                                                              |                                                                                                                                                                                                                                                                                                         | <b>Outcome</b>                                               | <b>Relative Importance</b> | <b>Certainty of the evidence (GRADE)</b> |       |
|                                                 |                                                                                                                                              |                                                                                                                                                                                                                                                                                                         | Falls                                                        | Critical                   | ⊕⊕⊕○<br>MODERATE                         |       |
|                                                 |                                                                                                                                              |                                                                                                                                                                                                                                                                                                         |                                                              |                            | ○○○○<br>MODERATE                         |       |
|                                                 |                                                                                                                                              |                                                                                                                                                                                                                                                                                                         |                                                              |                            | ○○○○<br>MODERATE                         |       |
|                                                 |                                                                                                                                              |                                                                                                                                                                                                                                                                                                         |                                                              |                            | ○○○○<br>MODERATE                         |       |
|                                                 |                                                                                                                                              |                                                                                                                                                                                                                                                                                                         |                                                              |                            | ○○○○<br>MODERATE                         |       |
|                                                 |                                                                                                                                              |                                                                                                                                                                                                                                                                                                         |                                                              |                            | ○○○○<br>MODERATE                         |       |
|                                                 |                                                                                                                                              |                                                                                                                                                                                                                                                                                                         |                                                              |                            | ○○○○<br>MODERATE                         |       |
|                                                 |                                                                                                                                              |                                                                                                                                                                                                                                                                                                         |                                                              |                            | ○○○○<br>MODERATE                         |       |
| What is the overall certainty of this evidence? | <ul style="list-style-type: none"> <li>○ No studies</li> <li>○ Very low</li> <li>○ Low</li> <li>● <b>Moderate</b></li> <li>○ High</li> </ul> |                                                                                                                                                                                                                                                                                                         |                                                              |                            |                                          |       |

|                                                                                                         |                                                                                                                                                                                                                                                       |                                     |                                     |  |                           |                           |
|---------------------------------------------------------------------------------------------------------|-------------------------------------------------------------------------------------------------------------------------------------------------------------------------------------------------------------------------------------------------------|-------------------------------------|-------------------------------------|--|---------------------------|---------------------------|
| How substantial are the desirable anticipated effects of the intervention?                              | <ul style="list-style-type: none"> <li>○ Large</li> <li>● <b>Moderate</b></li> <li>○ Small</li> <li>○ Trivial</li> <li>○ Varies</li> <li>○ Don't know</li> </ul>                                                                                      | <i>Summary of findings (GRADE):</i> |                                     |  |                           |                           |
|                                                                                                         |                                                                                                                                                                                                                                                       | <b>Outcome</b>                      | <b>Nº of patients</b>               |  |                           | <b>Effect</b>             |
| <b>Intervention</b>                                                                                     | <b>Control</b>                                                                                                                                                                                                                                        |                                     | <b>Relative / Absolute (95% CI)</b> |  |                           |                           |
| How substantial are the undesirable anticipated effects of the intervention?                            | <ul style="list-style-type: none"> <li>● <b>Trivial</b></li> <li>○ Small</li> <li>○ Moderate</li> <li>○ Large</li> <li>○ Varies</li> <li>○ Don't know</li> </ul>                                                                                      | Antipsychotics                      |                                     |  |                           | OR: 1.54<br>(1.28 - 1.85) |
|                                                                                                         |                                                                                                                                                                                                                                                       | Antidepressants                     |                                     |  |                           | OR: 1.57<br>(1.43 - 1.74) |
|                                                                                                         |                                                                                                                                                                                                                                                       | Benzodiazepines                     |                                     |  |                           | OR: 1.42<br>(1.22 - 1.65) |
| Does the balance between desirable effects and undesirable effects favour the option of the comparison? | <ul style="list-style-type: none"> <li>○ Favours the option</li> <li>● <b>Probably favours the option</b></li> <li>○ Does not favour either</li> <li>○ Probably favours the comparison</li> <li>○ Favours the comparison</li> <li>○ Varies</li> </ul> | Antipsychotics                      |                                     |  | OR: 1.54<br>(1.28 - 1.85) |                           |

|                                                                        |                                                                                                                                                                             |                                                                                                                                                                                                                                                                             |                                                                                                                                              |                                                      |
|------------------------------------------------------------------------|-----------------------------------------------------------------------------------------------------------------------------------------------------------------------------|-----------------------------------------------------------------------------------------------------------------------------------------------------------------------------------------------------------------------------------------------------------------------------|----------------------------------------------------------------------------------------------------------------------------------------------|------------------------------------------------------|
| Values and preferences                                                 | Is there similarity about how much patients, researchers, clinicians and stake holders value the main Outcomes? Also include adverse effects and burden of the intervention | <ul style="list-style-type: none"> <li>○ No</li> <li>○ Probably no</li> <li>○ Uncertain</li> <li>● <b>Probably yes</b></li> <li>○ Yes</li> <li>○ Varies</li> </ul>                                                                                                          |                                                                                                                                              |                                                      |
|                                                                        | Resources                                                                                                                                                                   | What is the certainty of the evidence of resources requirements (costs)?                                                                                                                                                                                                    | <ul style="list-style-type: none"> <li>● <b>No studies</b></li> <li>○ Very low</li> <li>○ Low</li> <li>○ Moderate</li> <li>○ High</li> </ul> | No mention of associated costs for the intervention. |
| Does the cost effectiveness favour the intervention or the comparison? |                                                                                                                                                                             | <ul style="list-style-type: none"> <li>● <b>No studies</b></li> <li>○ Favours the option</li> <li>○ Probably favours the option</li> <li>○ Does not favour either</li> <li>○ Probably favours the comparison</li> <li>○ Favours the comparison</li> <li>○ Varies</li> </ul> |                                                                                                                                              |                                                      |

|               |                                               |                                                                                                                                                                                                                                                                                                                             |                                                                            |  |
|---------------|-----------------------------------------------|-----------------------------------------------------------------------------------------------------------------------------------------------------------------------------------------------------------------------------------------------------------------------------------------------------------------------------|----------------------------------------------------------------------------|--|
| Equity        | What would be the impact on health equity?    | <ul style="list-style-type: none"> <li><input type="radio"/> Increased</li> <li><input type="radio"/> Probably increased</li> <li><input checked="" type="radio"/> <b>Uncertain</b></li> <li><input type="radio"/> Probably reduced</li> <li><input type="radio"/> Reduced</li> <li><input type="radio"/> Varies</li> </ul> | No mention in regards to the effects of the intervention on health equity. |  |
| Acceptability | Is the option acceptable to key stakeholders? | <ul style="list-style-type: none"> <li><input type="radio"/> No</li> <li><input type="radio"/> Probably no</li> <li><input type="radio"/> Uncertain</li> <li><input checked="" type="radio"/> <b>Probably yes</b></li> <li><input type="radio"/> Yes</li> <li><input type="radio"/> Varies</li> </ul>                       |                                                                            |  |



|             |                                            |                                                                                                                                                                                                                                                                                                       |  |  |
|-------------|--------------------------------------------|-------------------------------------------------------------------------------------------------------------------------------------------------------------------------------------------------------------------------------------------------------------------------------------------------------|--|--|
| Feasibility | Is the intervention feasible to implement? | <ul style="list-style-type: none"> <li><input type="radio"/> No</li> <li><input type="radio"/> Probably no</li> <li><input type="radio"/> Uncertain</li> <li><input checked="" type="radio"/> <b>Probably yes</b></li> <li><input type="radio"/> Yes</li> <li><input type="radio"/> Varies</li> </ul> |  |  |
|-------------|--------------------------------------------|-------------------------------------------------------------------------------------------------------------------------------------------------------------------------------------------------------------------------------------------------------------------------------------------------------|--|--|

**Should assessing for fall history and the risk of falls before prescribing potential fall risk increasing drugs (FRIDs) to older adults be recommended for older adults to prevent and manage falls?**

| Type of recommendation        | Strong recommendation against the intervention<br><input type="radio"/>                                                                                                                                                                                                                                                                                                                                                                                                                                                                                                                                                                                                                                                                                                                                                                                                                                                                                                                                                                                                                                                                                                                                                                      | Weak recommendation against the intervention<br><input type="radio"/> | Conditional recommendation for either the intervention or the comparison<br><input type="radio"/> | Weak recommendation for the intervention<br><input type="radio"/> | Strong recommendation for the intervention<br><input checked="" type="radio"/> |
|-------------------------------|----------------------------------------------------------------------------------------------------------------------------------------------------------------------------------------------------------------------------------------------------------------------------------------------------------------------------------------------------------------------------------------------------------------------------------------------------------------------------------------------------------------------------------------------------------------------------------------------------------------------------------------------------------------------------------------------------------------------------------------------------------------------------------------------------------------------------------------------------------------------------------------------------------------------------------------------------------------------------------------------------------------------------------------------------------------------------------------------------------------------------------------------------------------------------------------------------------------------------------------------|-----------------------------------------------------------------------|---------------------------------------------------------------------------------------------------|-------------------------------------------------------------------|--------------------------------------------------------------------------------|
| Recommendation                | Recommendation 1 (Assessment): We recommend assessing for fall history and the risk of falls before prescribing potential fall risk increasing drugs (FRIDs) to older adults. GRADE: 1B                                                                                                                                                                                                                                                                                                                                                                                                                                                                                                                                                                                                                                                                                                                                                                                                                                                                                                                                                                                                                                                      |                                                                       |                                                                                                   |                                                                   |                                                                                |
| Justification                 | There is strong evidence that certain medication use can increase fall risk in older adults. Avoiding prescriptions for FRIDs if a suitable and safer treatment option is available for older adults can significantly reduce fall risk. If FRIDs prescription is needed, appropriate dosage and dosing time should be carefully considered.                                                                                                                                                                                                                                                                                                                                                                                                                                                                                                                                                                                                                                                                                                                                                                                                                                                                                                 |                                                                       |                                                                                                   |                                                                   |                                                                                |
| Subgroup considerations       | Falling aggravated by the use of FRIDs is a critical issue for multi-morbid older adults and therefore this recommendation is valid for all settings: community, hospital and long-term care (including residential care and nursing homes).                                                                                                                                                                                                                                                                                                                                                                                                                                                                                                                                                                                                                                                                                                                                                                                                                                                                                                                                                                                                 |                                                                       |                                                                                                   |                                                                   |                                                                                |
| Implementation considerations | In prevention of falls due to FRIDs, no prescriptions if safer and suitable (non)-pharmacological alternatives are available could be a successful strategy to prevent falls in older adults. There are tools available to guide appropriate prescribing such as the STOPP/START, STOPPFall, STOPPFrail, Beers criteria, FORTA, and Web-based Meds75+. <sup>1-5</sup>                                                                                                                                                                                                                                                                                                                                                                                                                                                                                                                                                                                                                                                                                                                                                                                                                                                                        |                                                                       |                                                                                                   |                                                                   |                                                                                |
| Monitoring and evaluation     | <p>When prescribing medications in older adults, assessment for fall risk is always needed and the knowledge of FRIDs can help guide clinicians to weigh risks and benefits of treatments and thus, provide safer treatments for older adults.</p> <p>In addition, regular medication review is important due to unstable health conditions in older people. Over time, the benefits versus risks of medication change, highlighting the need for regular reassessment. In addition, the complexity of healthcare systems with multiple prescribers demands regular medication reviews. As FRIDs review is an essential part of the medication review, their regularity will help to keep the exposure to FRIDs as short as clinically indicated. This can reduce fall risk in older adults. This is particularly important for subgroups of frail older adults, who are especially at increased risk of falls,<sup>11</sup> and ADEs.<sup>12</sup> Thus medication review (including FRIDs review) is preferably performed every 6 months in frail older adults as their health situation can alter quickly over time. In non-frail older adults, medication review (including FRIDs review) is preferably performed at least annually.</p> |                                                                       |                                                                                                   |                                                                   |                                                                                |

|                     |      |
|---------------------|------|
| Research Priorities | None |
|---------------------|------|

## Recommendations for Working Group 2: Polypharmacy, Fall Risk Increasing Drugs, and Falls

**Recommendation 2 (Assessment): We recommend the use of a validated, structured screening and assessment tool to identify FRIDs when performing a general medication review or medication review targeted to falls prevention. GRADE: 1C**

| <b>Population:</b>      | Older adults aged $\geq 65$ years        | <i>Objective: Older adults 65 years and older have an increased risk of falls. Polypharmacy and use of certain drugs are strongly associated with increased risk for falls in older adults (particularly central nervous system (CNS) drugs and cardiovascular drugs).<br/>The objective was to review the literature to evaluate if a structured assessment of FRIDS e.g., by utilizing a screening and assessment tool within a medication review is warranted.</i> |                                      |                                         |
|-------------------------|------------------------------------------|-----------------------------------------------------------------------------------------------------------------------------------------------------------------------------------------------------------------------------------------------------------------------------------------------------------------------------------------------------------------------------------------------------------------------------------------------------------------------|--------------------------------------|-----------------------------------------|
| <b>Intervention:</b>    | Structured screening and assessment tool |                                                                                                                                                                                                                                                                                                                                                                                                                                                                       |                                      |                                         |
| <b>Comparison:</b>      | Continued prescription of FREDs          |                                                                                                                                                                                                                                                                                                                                                                                                                                                                       |                                      |                                         |
| <b>Main outcomes:</b>   | Falls                                    |                                                                                                                                                                                                                                                                                                                                                                                                                                                                       |                                      |                                         |
| <b>Setting:</b>         | Any setting                              |                                                                                                                                                                                                                                                                                                                                                                                                                                                                       |                                      |                                         |
| <b>Perspective:</b>     | Population                               |                                                                                                                                                                                                                                                                                                                                                                                                                                                                       |                                      |                                         |
| Decision Domain         |                                          | Judgements                                                                                                                                                                                                                                                                                                                                                                                                                                                            | Research Evidence                    | Additional Considerations /Explanations |
| Priority of the Problem | Is the problem a priority?               | <ul style="list-style-type: none"> <li>○ No</li> <li>○ Probably no</li> <li>○ Uncertain</li> <li>○ Probably yes</li> <li>● <b>Yes</b></li> <li>○ Varies</li> </ul>                                                                                                                                                                                                                                                                                                    | See 'Overview of the Problem' above. |                                         |

|                                                 |                                                                                                                                              |                                                                                                                                                                                                                                                                                                         |                                                              |                            |                                          |       |
|-------------------------------------------------|----------------------------------------------------------------------------------------------------------------------------------------------|---------------------------------------------------------------------------------------------------------------------------------------------------------------------------------------------------------------------------------------------------------------------------------------------------------|--------------------------------------------------------------|----------------------------|------------------------------------------|-------|
| <b>Benefits and harms</b><br>(see below)        | Is there important uncertainty or variability in how much patients, researchers, clinicians and stake holders value the main outcomes?       | <ul style="list-style-type: none"> <li>○ Important uncertainty or variability</li> <li>○ Possibly important uncertainty or variability</li> <li>● <b>Probably no important uncertainty of variability</b></li> <li>○ No important uncertainty of variability</li> <li>○ No known undesirable</li> </ul> | <b>Relative importance of the main outcomes of interest:</b> |                            |                                          | None. |
|                                                 |                                                                                                                                              |                                                                                                                                                                                                                                                                                                         | <b>Outcome</b>                                               | <b>Relative Importance</b> | <b>Certainty of the evidence (GRADE)</b> |       |
|                                                 |                                                                                                                                              |                                                                                                                                                                                                                                                                                                         | Falls                                                        | Critical                   | ⊕○○○<br>VERY LOW                         |       |
|                                                 |                                                                                                                                              |                                                                                                                                                                                                                                                                                                         |                                                              |                            | ○○○○<br>MODERATE                         |       |
|                                                 |                                                                                                                                              |                                                                                                                                                                                                                                                                                                         |                                                              |                            | ○○○○<br>MODERATE                         |       |
|                                                 |                                                                                                                                              |                                                                                                                                                                                                                                                                                                         |                                                              |                            | ○○○○<br>MODERATE                         |       |
|                                                 |                                                                                                                                              |                                                                                                                                                                                                                                                                                                         |                                                              |                            | ○○○○<br>MODERATE                         |       |
|                                                 |                                                                                                                                              |                                                                                                                                                                                                                                                                                                         |                                                              |                            | ○○○○<br>MODERATE                         |       |
|                                                 |                                                                                                                                              |                                                                                                                                                                                                                                                                                                         |                                                              |                            | ○○○○<br>MODERATE                         |       |
|                                                 |                                                                                                                                              |                                                                                                                                                                                                                                                                                                         |                                                              |                            | ○○○○<br>MODERATE                         |       |
| What is the overall certainty of this evidence? | <ul style="list-style-type: none"> <li>○ No studies</li> <li>● <b>Very low</b></li> <li>○ Low</li> <li>○ Moderate</li> <li>○ High</li> </ul> |                                                                                                                                                                                                                                                                                                         |                                                              |                            |                                          |       |

|                                                                                                         |                                                                                                                                                                                                                                                       |                                     |                       |                |                                                    |                                     |
|---------------------------------------------------------------------------------------------------------|-------------------------------------------------------------------------------------------------------------------------------------------------------------------------------------------------------------------------------------------------------|-------------------------------------|-----------------------|----------------|----------------------------------------------------|-------------------------------------|
| How substantial are the desirable anticipated effects of the intervention?                              | <ul style="list-style-type: none"> <li>○ Large</li> <li>● <b>Moderate</b></li> <li>○ Small</li> <li>○ Trivial</li> <li>○ Varies</li> <li>○ Don't know</li> </ul>                                                                                      | <b>Summary of findings (GRADE):</b> |                       |                | Lack of supporting evidence for the recommendation |                                     |
|                                                                                                         |                                                                                                                                                                                                                                                       | <b>Outcome</b>                      | <b>Nº of patients</b> |                |                                                    | <b>Effect</b>                       |
|                                                                                                         |                                                                                                                                                                                                                                                       |                                     | <b>Intervention</b>   | <b>Control</b> |                                                    | <b>Relative / Absolute (95% CI)</b> |
|                                                                                                         |                                                                                                                                                                                                                                                       |                                     |                       |                |                                                    |                                     |
| How substantial are the undesirable anticipated effects of the intervention?                            | <ul style="list-style-type: none"> <li>● <b>Trivial</b></li> <li>○ Small</li> <li>○ Moderate</li> <li>○ Large</li> <li>○ Varies</li> <li>○ Don't know</li> </ul>                                                                                      |                                     |                       |                |                                                    |                                     |
|                                                                                                         |                                                                                                                                                                                                                                                       |                                     |                       |                |                                                    |                                     |
|                                                                                                         |                                                                                                                                                                                                                                                       |                                     |                       |                |                                                    |                                     |
| Does the balance between desirable effects and undesirable effects favour the option of the comparison? | <ul style="list-style-type: none"> <li>○ Favours the option</li> <li>● <b>Probably favours the option</b></li> <li>○ Does not favour either</li> <li>○ Probably favours the comparison</li> <li>○ Favours the comparison</li> <li>○ Varies</li> </ul> |                                     |                       |                |                                                    |                                     |
|                                                                                                         |                                                                                                                                                                                                                                                       |                                     |                       |                |                                                    |                                     |
|                                                                                                         |                                                                                                                                                                                                                                                       |                                     |                       |                |                                                    |                                     |

|                                                                        |                                                                                                                                                                             |                                                                                                                                                                                                                                                                             |                                                                                                                                              |                                                                |
|------------------------------------------------------------------------|-----------------------------------------------------------------------------------------------------------------------------------------------------------------------------|-----------------------------------------------------------------------------------------------------------------------------------------------------------------------------------------------------------------------------------------------------------------------------|----------------------------------------------------------------------------------------------------------------------------------------------|----------------------------------------------------------------|
| Values and preferences                                                 | Is there similarity about how much patients, researchers, clinicians and stake holders value the main Outcomes? Also include adverse effects and burden of the intervention | <ul style="list-style-type: none"> <li>○ No</li> <li>○ Probably no</li> <li>○ Uncertain</li> <li>● <b>Probably yes</b></li> <li>○ Yes</li> <li>○ Varies</li> </ul>                                                                                                          |                                                                                                                                              |                                                                |
|                                                                        | Resources                                                                                                                                                                   | What is the certainty of the evidence of resources requirements (costs)?                                                                                                                                                                                                    | <ul style="list-style-type: none"> <li>● <b>No studies</b></li> <li>○ Very low</li> <li>○ Low</li> <li>○ Moderate</li> <li>○ High</li> </ul> | No studies indicating any associated cost of the intervention. |
| Does the cost effectiveness favour the intervention or the comparison? |                                                                                                                                                                             | <ul style="list-style-type: none"> <li>● <b>No studies</b></li> <li>○ Favours the option</li> <li>○ Probably favours the option</li> <li>○ Does not favour either</li> <li>○ Probably favours the comparison</li> <li>○ Favours the comparison</li> <li>○ Varies</li> </ul> |                                                                                                                                              |                                                                |

|               |                                               |                                                                                                                                                                                                                                                                                                                             |                                                                 |  |
|---------------|-----------------------------------------------|-----------------------------------------------------------------------------------------------------------------------------------------------------------------------------------------------------------------------------------------------------------------------------------------------------------------------------|-----------------------------------------------------------------|--|
| Equity        | What would be the impact on health equity?    | <ul style="list-style-type: none"> <li><input type="radio"/> Increased</li> <li><input type="radio"/> Probably increased</li> <li><input checked="" type="radio"/> <b>Uncertain</b></li> <li><input type="radio"/> Probably reduced</li> <li><input type="radio"/> Reduced</li> <li><input type="radio"/> Varies</li> </ul> | No mention on the effects of the intervention on health equity. |  |
| Acceptability | Is the option acceptable to key stakeholders? | <ul style="list-style-type: none"> <li><input type="radio"/> No</li> <li><input type="radio"/> Probably no</li> <li><input type="radio"/> Uncertain</li> <li><input checked="" type="radio"/> <b>Probably yes</b></li> <li><input type="radio"/> Yes</li> <li><input type="radio"/> Varies</li> </ul>                       |                                                                 |  |

|             |                                            |                                                                                                                                                                                                                                                                                                       |                                                                                                    |  |
|-------------|--------------------------------------------|-------------------------------------------------------------------------------------------------------------------------------------------------------------------------------------------------------------------------------------------------------------------------------------------------------|----------------------------------------------------------------------------------------------------|--|
| Feasibility | Is the intervention feasible to implement? | <ul style="list-style-type: none"> <li><input type="radio"/> No</li> <li><input type="radio"/> Probably no</li> <li><input type="radio"/> Uncertain</li> <li><input checked="" type="radio"/> <b>Probably yes</b></li> <li><input type="radio"/> Yes</li> <li><input type="radio"/> Varies</li> </ul> | The implementation of a routine medication review should not pose to much difficulty to implement. |  |
|-------------|--------------------------------------------|-------------------------------------------------------------------------------------------------------------------------------------------------------------------------------------------------------------------------------------------------------------------------------------------------------|----------------------------------------------------------------------------------------------------|--|

**Should the use of a validated, structured screening and assessment tool to identify FRIDs when performing a regular routine medication review or medication review targeted to falls prevention in older adults be recommended for older adults to prevent and manage falls?**

| Type of recommendation        | Strong recommendation against the intervention<br><input type="radio"/>                                                                                                                                                                                                                                                                                                                                                                                                                                                                                                                                                                                                                                                                                                                                                                                                                                                                    | Weak recommendation against the intervention<br><input type="radio"/> | Conditional recommendation for either the intervention or the comparison<br><input type="radio"/> | Weak recommendation for the intervention<br><input type="radio"/> | Strong recommendation for the intervention<br><input checked="" type="radio"/> |
|-------------------------------|--------------------------------------------------------------------------------------------------------------------------------------------------------------------------------------------------------------------------------------------------------------------------------------------------------------------------------------------------------------------------------------------------------------------------------------------------------------------------------------------------------------------------------------------------------------------------------------------------------------------------------------------------------------------------------------------------------------------------------------------------------------------------------------------------------------------------------------------------------------------------------------------------------------------------------------------|-----------------------------------------------------------------------|---------------------------------------------------------------------------------------------------|-------------------------------------------------------------------|--------------------------------------------------------------------------------|
| Recommendation                | Recommendation 2 (Assessment): We recommend the use of a validated, structured screening and assessment tool to identify FRIDs when performing a general medication review or medication review targeted to falls prevention. GRADE: 1C                                                                                                                                                                                                                                                                                                                                                                                                                                                                                                                                                                                                                                                                                                    |                                                                       |                                                                                                   |                                                                   |                                                                                |
| Justification                 | There is limited evidence that assessment of FRIDs within medication review and deprescribing of FRIDs as a unifactorial intervention can successfully reduce falls. However, incorporating a medication review in a holistic multifactorial fall risk assessment with a view to deprescribing of FRIDs, where appropriate, is warranted. <sup>26</sup> In addition, deprescribing based on comprehensive medication review may reduce mortality and potentially inappropriate medications and it has been suggested that deprescribing could be safe, feasible, well tolerated and can lead to important benefits in frail individuals <sup>29, 30</sup> . A structured approach is included in the definition of medication reviewing as determined by among others the NICE guidelines. <sup>31</sup> Guideline recommendations on the structured approach include advice to use an appropriate tool that is easy to use. <sup>32</sup> |                                                                       |                                                                                                   |                                                                   |                                                                                |
| Subgroup considerations       | Inappropriate prescribing is considered an important issue for multi-morbid older people and therefore this recommendation is valid for all settings: community, hospital, and long-term care (including residential care and nursing homes). <sup>33-35</sup>                                                                                                                                                                                                                                                                                                                                                                                                                                                                                                                                                                                                                                                                             |                                                                       |                                                                                                   |                                                                   |                                                                                |
| Implementation considerations | Deprescribing is often a challenging process. Therefore, an assessment and deprescribing tool can help to support rational deprescribing. Utilizing screening tools such as STOPPFall could potentially improve the quality of medication reviews and appropriate deprescribing in older people at risk of falls. <sup>1</sup>                                                                                                                                                                                                                                                                                                                                                                                                                                                                                                                                                                                                             |                                                                       |                                                                                                   |                                                                   |                                                                                |
| Monitoring and evaluation     | A structured assessment of FRIDs, within a medication review should be provided regularly i.e., at least annually.                                                                                                                                                                                                                                                                                                                                                                                                                                                                                                                                                                                                                                                                                                                                                                                                                         |                                                                       |                                                                                                   |                                                                   |                                                                                |
| Research Priorities           | STOPPFall has been shown to be predictive of falls in a hospital setting. Further studies are needed to demonstrate the effectiveness of STOPPFall and other deprescribing tools in falls prevention.                                                                                                                                                                                                                                                                                                                                                                                                                                                                                                                                                                                                                                                                                                                                      |                                                                       |                                                                                                   |                                                                   |                                                                                |



## Recommendations for Working Group 2: Polypharmacy, Fall Risk Increasing Drugs, and Falls

### Recommendation 3 (Interventions): We recommend that a medication review and appropriate deprescribing of fall-risk increasing drugs (FRIDs) should be part of multidomain falls prevention interventions. GRADE: 1B

| <b>Population:</b>      | Older adults aged $\geq 65$ years             | <p><b>Objective:</b> One of the typical components of a multifactorial fall's prevention strategy is the identification and rational deprescribing of certain medications. The rationale behind this intervention is the establishment of specific medications as risk factors for falls and the reversibility, after deprescribing, of possible adverse effects leading to falls such as the presence of orthostatic hypotension or sedation.</p> <p>The term "deprescribing" has been described as "the process of withdrawal of an inappropriate medication, supervised by a health care professional with the goal of managing polypharmacy and improving outcomes".<sup>36</sup> The objective was to assess whether medication review and deprescribing of FRIDs should be included in the multifactorial falls prevention intervention.</p> |                                      |                                         |
|-------------------------|-----------------------------------------------|----------------------------------------------------------------------------------------------------------------------------------------------------------------------------------------------------------------------------------------------------------------------------------------------------------------------------------------------------------------------------------------------------------------------------------------------------------------------------------------------------------------------------------------------------------------------------------------------------------------------------------------------------------------------------------------------------------------------------------------------------------------------------------------------------------------------------------------------------|--------------------------------------|-----------------------------------------|
| <b>Intervention:</b>    | Medication review and deprescription of FREDs |                                                                                                                                                                                                                                                                                                                                                                                                                                                                                                                                                                                                                                                                                                                                                                                                                                                    |                                      |                                         |
| <b>Comparison:</b>      | multifactorial fall prevention interventions  |                                                                                                                                                                                                                                                                                                                                                                                                                                                                                                                                                                                                                                                                                                                                                                                                                                                    |                                      |                                         |
| <b>Main outcomes:</b>   | Falls                                         |                                                                                                                                                                                                                                                                                                                                                                                                                                                                                                                                                                                                                                                                                                                                                                                                                                                    |                                      |                                         |
| <b>Setting:</b>         | Any setting                                   |                                                                                                                                                                                                                                                                                                                                                                                                                                                                                                                                                                                                                                                                                                                                                                                                                                                    |                                      |                                         |
| <b>Perspective:</b>     | Population                                    |                                                                                                                                                                                                                                                                                                                                                                                                                                                                                                                                                                                                                                                                                                                                                                                                                                                    |                                      |                                         |
| Decision Domain         |                                               | Judgements                                                                                                                                                                                                                                                                                                                                                                                                                                                                                                                                                                                                                                                                                                                                                                                                                                         | Research Evidence                    | Additional Considerations /Explanations |
| Priority of the Problem | Is the problem a priority?                    | <ul style="list-style-type: none"> <li>○ No</li> <li>○ Probably no</li> <li>○ Uncertain</li> <li>○ Probably yes</li> <li>● <b>Yes</b></li> <li>○ Varies</li> </ul>                                                                                                                                                                                                                                                                                                                                                                                                                                                                                                                                                                                                                                                                                 | See 'Overview of the Problem' above. |                                         |

|                                                 |                                                                                                                                              |                                                                                                                                                                                                                                                                                                         |                                                              |                            |                                          |       |
|-------------------------------------------------|----------------------------------------------------------------------------------------------------------------------------------------------|---------------------------------------------------------------------------------------------------------------------------------------------------------------------------------------------------------------------------------------------------------------------------------------------------------|--------------------------------------------------------------|----------------------------|------------------------------------------|-------|
| Benefits and harms<br>(see below)               | Is there important uncertainty or variability in how much patients, researchers, clinicians and stake holders value the main outcomes?       | <ul style="list-style-type: none"> <li>○ Important uncertainty or variability</li> <li>○ Possibly important uncertainty or variability</li> <li>● <b>Probably no important uncertainty of variability</b></li> <li>○ No important uncertainty of variability</li> <li>○ No known undesirable</li> </ul> | <b>Relative importance of the main outcomes of interest:</b> |                            |                                          | None. |
|                                                 |                                                                                                                                              |                                                                                                                                                                                                                                                                                                         | <b>Outcome</b>                                               | <b>Relative Importance</b> | <b>Certainty of the evidence (GRADE)</b> |       |
|                                                 |                                                                                                                                              |                                                                                                                                                                                                                                                                                                         | Falls                                                        | Critical                   | ⊕⊕⊕○<br>MODERATE                         |       |
|                                                 |                                                                                                                                              |                                                                                                                                                                                                                                                                                                         | Exercise (exerc)                                             | Important                  | ⊕⊕⊕○<br>MODERATE                         |       |
|                                                 |                                                                                                                                              |                                                                                                                                                                                                                                                                                                         | Assistive technology (assist)                                | Important                  | ⊕⊕⊕○<br>MODERATE                         |       |
|                                                 |                                                                                                                                              |                                                                                                                                                                                                                                                                                                         | Environmental assessment and modification (envir)            | Important                  | ⊕⊕⊕○<br>MODERATE                         |       |
|                                                 |                                                                                                                                              |                                                                                                                                                                                                                                                                                                         | Quality improvement strategies (qualt)                       | Important                  | ⊕⊕⊕○<br>MODERATE                         |       |
|                                                 |                                                                                                                                              |                                                                                                                                                                                                                                                                                                         | Basic fall risk assessment (brisk)                           | Important                  | ⊕⊕⊕○<br>MODERATE                         |       |
|                                                 |                                                                                                                                              |                                                                                                                                                                                                                                                                                                         |                                                              |                            | ○○○○<br>MODERATE                         |       |
|                                                 |                                                                                                                                              |                                                                                                                                                                                                                                                                                                         |                                                              |                            | ○○○○<br>MODERATE                         |       |
| What is the overall certainty of this evidence? | <ul style="list-style-type: none"> <li>○ No studies</li> <li>○ Very low</li> <li>○ Low</li> <li>● <b>Moderate</b></li> <li>○ High</li> </ul> |                                                                                                                                                                                                                                                                                                         |                                                              |                            |                                          |       |

| How substantial are the desirable anticipated effects of the intervention?                              | <ul style="list-style-type: none"> <li>○ Large</li> <li>● <b>Moderate</b></li> <li>○ Small</li> <li>○ Trivial</li> <li>○ Varies</li> <li>○ Don't know</li> </ul>                                                                                      | <i>Summary of findings (GRADE):</i>                                     |                       |                | *Rate ratio                         |
|---------------------------------------------------------------------------------------------------------|-------------------------------------------------------------------------------------------------------------------------------------------------------------------------------------------------------------------------------------------------------|-------------------------------------------------------------------------|-----------------------|----------------|-------------------------------------|
|                                                                                                         |                                                                                                                                                                                                                                                       | <b>Outcome</b>                                                          | <b>Nº of patients</b> |                |                                     |
|                                                                                                         |                                                                                                                                                                                                                                                       |                                                                         | <b>Intervention</b>   | <b>Control</b> | <b>Relative / Absolute (95% CI)</b> |
|                                                                                                         |                                                                                                                                                                                                                                                       | Assist + brisk                                                          |                       |                | RR: 0.52<br>(0.30–0.90)             |
| How substantial are the undesirable anticipated effects of the intervention?                            | <ul style="list-style-type: none"> <li>● <b>Trivial</b></li> <li>○ Small</li> <li>○ Moderate</li> <li>○ Large</li> <li>○ Varies</li> <li>○ Don't know</li> </ul>                                                                                      | envir+assist+qualt+hypot+brisk                                          |                       |                | RR: 0.62<br>(0.43–0.88)             |
|                                                                                                         |                                                                                                                                                                                                                                                       | qualt+brisk                                                             |                       |                | RR: 0.84<br>(0.73–0.96)             |
| Does the balance between desirable effects and undesirable effects favour the option of the comparison? | <ul style="list-style-type: none"> <li>○ Favours the option</li> <li>● <b>Probably favours the option</b></li> <li>○ Does not favour either</li> <li>○ Probably favours the comparison</li> <li>○ Favours the comparison</li> <li>○ Varies</li> </ul> | exerc+envir+assist+qualt+brisk                                          |                       |                | RR: 0.85<br>(0.74–0.98)             |
|                                                                                                         |                                                                                                                                                                                                                                                       | exerc+management of urinary incontinence +envir+assist+qualt+brisk      |                       |                | RR: 1.58<br>(1.01–2.48)             |
|                                                                                                         |                                                                                                                                                                                                                                                       | envir+assist+qualt+management of orthostatic hypotension (hypot)+brisk* |                       |                | RR: 0.42<br>(0.30–0.58)             |
|                                                                                                         |                                                                                                                                                                                                                                                       | exerc+envir+assist+hypot+brisk*                                         |                       |                | RR: 0.73<br>(0.59–0.92)             |
|                                                                                                         |                                                                                                                                                                                                                                                       | exerc+qualt+hypot+brisk*                                                |                       |                | RR: 2.08<br>(1.34–3.25)             |

|  |  |  |                                                          |  |  |                         |  |
|--|--|--|----------------------------------------------------------|--|--|-------------------------|--|
|  |  |  | exerc+fluid or nutrition therapy<br>+envir+assist+brisk* |  |  | RR: 1.84<br>(1.14–2.97) |  |
|--|--|--|----------------------------------------------------------|--|--|-------------------------|--|

|                                                                                                    |                                                                                                                                                                                        |                                                                                                                                                                                                                                                                            |                                                                                                                                                                |  |
|----------------------------------------------------------------------------------------------------|----------------------------------------------------------------------------------------------------------------------------------------------------------------------------------------|----------------------------------------------------------------------------------------------------------------------------------------------------------------------------------------------------------------------------------------------------------------------------|----------------------------------------------------------------------------------------------------------------------------------------------------------------|--|
| <p style="writing-mode: vertical-rl; transform: rotate(180deg);"><b>Values and preferences</b></p> | <p>Is there similarity about how much patients, researchers, clinicians and stake holders value the main Outcomes?<br/>Also include adverse effects and burden of the intervention</p> | <ul style="list-style-type: none"> <li>○ No</li> <li>○ Probably no</li> <li>○ Uncertain</li> <li>● <b>Probably yes</b></li> <li>○ Yes</li> <li>○ Varies</li> </ul>                                                                                                         |                                                                                                                                                                |  |
| <p style="writing-mode: vertical-rl; transform: rotate(180deg);"><b>Resources</b></p>              | <p>What is the certainty of the evidence of resources requirements (costs)?</p>                                                                                                        | <ul style="list-style-type: none"> <li>● <b>No studies</b></li> <li>○ Very low</li> <li>○ Low</li> <li>○ Moderate</li> <li>○ High</li> </ul>                                                                                                                               | <p>No studies specifically outlining the cost of each combination o assessments, however there certainly will be some degree of cost for some assessments.</p> |  |
|                                                                                                    | <p>Does the cost effectiveness favour the intervention or the comparison?</p>                                                                                                          | <ul style="list-style-type: none"> <li>● <b>No studies</b></li> <li>○ Favours the option</li> <li>○ Probably favours the option</li> <li>○ Does not favoureither</li> <li>○ Probably favours the comparison</li> <li>○ Favours the comparison</li> <li>○ Varies</li> </ul> |                                                                                                                                                                |  |

|               |                                               |                                                                                                                                                                                                                                                                                                                             |                                                         |  |
|---------------|-----------------------------------------------|-----------------------------------------------------------------------------------------------------------------------------------------------------------------------------------------------------------------------------------------------------------------------------------------------------------------------------|---------------------------------------------------------|--|
| Equity        | What would be the impact on health equity?    | <ul style="list-style-type: none"> <li><input type="radio"/> Increased</li> <li><input type="radio"/> Probably increased</li> <li><input checked="" type="radio"/> <b>Uncertain</b></li> <li><input type="radio"/> Probably reduced</li> <li><input type="radio"/> Reduced</li> <li><input type="radio"/> Varies</li> </ul> | No mention of the interventions impact on health equity |  |
| Acceptability | Is the option acceptable to key stakeholders? | <ul style="list-style-type: none"> <li><input type="radio"/> No</li> <li><input type="radio"/> Probably no</li> <li><input type="radio"/> Uncertain</li> <li><input checked="" type="radio"/> <b>Probably yes</b></li> <li><input type="radio"/> Yes</li> <li><input type="radio"/> Varies</li> </ul>                       |                                                         |  |

|             |                                            |                                                                                                                                                                    |  |  |
|-------------|--------------------------------------------|--------------------------------------------------------------------------------------------------------------------------------------------------------------------|--|--|
| Feasibility | Is the intervention feasible to implement? | <ul style="list-style-type: none"> <li>○ No</li> <li>○ Probably no</li> <li>○ Uncertain</li> <li>● <b>Probably yes</b></li> <li>○ Yes</li> <li>○ Varies</li> </ul> |  |  |
|-------------|--------------------------------------------|--------------------------------------------------------------------------------------------------------------------------------------------------------------------|--|--|

**Should medication review and appropriate deprescribing of fall-risk increasing drugs (FRIDs) should be part of the multifactorial fall's prevention interventions be recommended for older adults to prevent and manage falls?**

| Type of recommendation        | Strong recommendation against the intervention<br>○                                                                                                                                                                                                                                                                                                                                                                                                                                                                                                                                                                                                                                                                                                                                                                                                                                                                                                                                                                                                                                                                                                                                                                                                                                                                                                                                                                                                                                                                 | Weak recommendation against the intervention<br>○ | Conditional recommendation for either the intervention or the comparison<br>○ | Weak recommendation for the intervention<br>○ | Strong recommendation for the intervention<br>● |
|-------------------------------|---------------------------------------------------------------------------------------------------------------------------------------------------------------------------------------------------------------------------------------------------------------------------------------------------------------------------------------------------------------------------------------------------------------------------------------------------------------------------------------------------------------------------------------------------------------------------------------------------------------------------------------------------------------------------------------------------------------------------------------------------------------------------------------------------------------------------------------------------------------------------------------------------------------------------------------------------------------------------------------------------------------------------------------------------------------------------------------------------------------------------------------------------------------------------------------------------------------------------------------------------------------------------------------------------------------------------------------------------------------------------------------------------------------------------------------------------------------------------------------------------------------------|---------------------------------------------------|-------------------------------------------------------------------------------|-----------------------------------------------|-------------------------------------------------|
| Recommendation                | Recommendation 3 (Interventions): We recommend that a medication review and appropriate deprescribing of fall-risk increasing drugs (FRIDs) should be part of multidomain falls prevention interventions. GRADE: 1B                                                                                                                                                                                                                                                                                                                                                                                                                                                                                                                                                                                                                                                                                                                                                                                                                                                                                                                                                                                                                                                                                                                                                                                                                                                                                                 |                                                   |                                                                               |                                               |                                                 |
| Justification                 | Medication review and deprescribing should be a standard component of the multifactorial approach. Due to very heterogeneous approaches and research populations, it is difficult to determine the optimal content of the FRIDs deprescribing component, since in studies this varied between single drug group deprescribing (e.g., benzodiazepines) to a broad deprescribing approach. <sup>44,45</sup> In general, when conducting a medication review as a part of a multidomain intervention, deprescribing of FRIDs can be performed safely in older people at risk of falls. <sup>46</sup> Few adverse withdrawal effects occur, and if symptoms re-occur, they can be safely treated by restarting the withdrawn medication or if possible a safer alternative. <sup>46,47</sup> There are some data available on the rate of re-prescribing of FRIDs and depending on the drug groups, this varies between 0-50%. <sup>46,47</sup>                                                                                                                                                                                                                                                                                                                                                                                                                                                                                                                                                                         |                                                   |                                                                               |                                               |                                                 |
| Subgroup considerations       | Studies have shown that the effect of FRIDs on fall risk is likely dependent on patient characteristics as explained above. <sup>43</sup> A medication review will not lead to similar recommendations in different individuals due to the heterogeneity in the older population and their respective pharmacotherapy. Patient preferences should be incorporated into treatment decisions via SDM. As the level of evidence on the benefit versus risk ratio of medications is low in this patient population, most decisions about deprescribing or continuing are preference-sensitive. SDM can result in better-informed patients who opt for deprescribing more often. Hence, SDM is essential component of deprescribing.                                                                                                                                                                                                                                                                                                                                                                                                                                                                                                                                                                                                                                                                                                                                                                                     |                                                   |                                                                               |                                               |                                                 |
| Implementation considerations | In general, the barriers and enablers for deprescribing can be categorized into environmental (e.g., regulatory, financial, policy), healthcare organization, provider, and patient/public related factors. <sup>48</sup> Lack of knowledge and skills is a significant barrier to healthcare professionals' capacity to implement effective fall-prevention approaches. <sup>49</sup> The withdrawal of FRIDs and not being able to predict the outcome of changes in pharmacotherapy are perceived as challenging by many physicians. <sup>50</sup> In addition, some older adults are also hesitant to stop their medication, fearing withdrawal reactions and relapse of their disease. <sup>51</sup> Finally, successful deprescribing of FRIDs may be short-lived as patients or doctors may initiate their resumption, especially for psychotropics. <sup>52</sup> For the long-term success of deprescribing, provision of education, monitoring, support, and documentation are crucial. <sup>1</sup> For successful implementation, education of both patients, family members/caretakers and health care professionals is essential. Also structured follow-up of symptoms is warranted. <sup>9,26</sup> Given the complexity of the intervention, supporting structured tools (such as STOPPFall) are warranted accompanied with appropriate training. <sup>49,53</sup> Given the complexity of the intervention, allocation of sufficient time and resources is necessary to optimize success rate and |                                                   |                                                                               |                                               |                                                 |

|                           |                                                                                                                                                                                                                                                                                                                                                                                                                                                                                             |
|---------------------------|---------------------------------------------------------------------------------------------------------------------------------------------------------------------------------------------------------------------------------------------------------------------------------------------------------------------------------------------------------------------------------------------------------------------------------------------------------------------------------------------|
|                           | effectiveness.                                                                                                                                                                                                                                                                                                                                                                                                                                                                              |
| Monitoring and evaluation | Long-term success of deprescribing can be increased by provision of monitoring, support, and documentation. For future studies, more comparability is warranted in terms of targeted medication classes. For successful long-term effect of the deprescribing intervention, a medication review should be provided regularly, at least yearly as a minimum interval. For frail older persons, this is preferably done every 6 months as their health situation can alter quickly over time. |
| Research Priorities       | None                                                                                                                                                                                                                                                                                                                                                                                                                                                                                        |



## Recommendations for Working Group 2: Polypharmacy, Fall Risk Increasing Drugs, and Falls

**Recommendation 4 (Interventions): We recommend that in long-term care residents, the falls prevention strategy should always include rational deprescribing of fall-risk-increasing drugs.**

**GRADE: 1C**

| <b>Population:</b>      | Older adults aged $\geq 65$ years                   | <p><b>Objective:</b> One of the typical components of a multifactorial fall's prevention strategy is the identification and deprescribing of certain medications. The rationale behind this intervention is the establishment of specific medications as risk factors for falls and the reversibility of possible adverse effects leading to falls such as presence of orthostatic hypotension, unsteady gait or sedation after deprescribing.</p> <p>Both in studies as well as in clinical practice, the intervention of deprescribing of FRIDs differs largely, varying from deprescribing a single drug group (such as sedatives) or deprescribing any drug with possible fall-related ADEs with the aim of reducing fall risk. Thus, the objective was to assess deprescribing and medication review interventions as a single intervention in falls prevention. The intervention could be any deprescribing or medication review intervention.</p> |                                      |                                         |
|-------------------------|-----------------------------------------------------|----------------------------------------------------------------------------------------------------------------------------------------------------------------------------------------------------------------------------------------------------------------------------------------------------------------------------------------------------------------------------------------------------------------------------------------------------------------------------------------------------------------------------------------------------------------------------------------------------------------------------------------------------------------------------------------------------------------------------------------------------------------------------------------------------------------------------------------------------------------------------------------------------------------------------------------------------------|--------------------------------------|-----------------------------------------|
| <b>Intervention:</b>    | Deprescribing of FREDs as a standalone intervention |                                                                                                                                                                                                                                                                                                                                                                                                                                                                                                                                                                                                                                                                                                                                                                                                                                                                                                                                                          |                                      |                                         |
| <b>Comparison:</b>      | Usual care                                          |                                                                                                                                                                                                                                                                                                                                                                                                                                                                                                                                                                                                                                                                                                                                                                                                                                                                                                                                                          |                                      |                                         |
| <b>Main outcomes:</b>   | Falls                                               |                                                                                                                                                                                                                                                                                                                                                                                                                                                                                                                                                                                                                                                                                                                                                                                                                                                                                                                                                          |                                      |                                         |
| <b>Setting:</b>         | All settings                                        |                                                                                                                                                                                                                                                                                                                                                                                                                                                                                                                                                                                                                                                                                                                                                                                                                                                                                                                                                          |                                      |                                         |
| <b>Perspective:</b>     | Population                                          |                                                                                                                                                                                                                                                                                                                                                                                                                                                                                                                                                                                                                                                                                                                                                                                                                                                                                                                                                          |                                      |                                         |
| Decision Domain         |                                                     | Judgements                                                                                                                                                                                                                                                                                                                                                                                                                                                                                                                                                                                                                                                                                                                                                                                                                                                                                                                                               | Research Evidence                    | Additional Considerations /Explanations |
| Priority of the Problem | Is the problem a priority?                          | <ul style="list-style-type: none"> <li>○ No</li> <li>○ Probably no</li> <li>○ Uncertain</li> <li>○ Probably yes</li> <li>● <b>Yes</b></li> <li>○ Varies</li> </ul>                                                                                                                                                                                                                                                                                                                                                                                                                                                                                                                                                                                                                                                                                                                                                                                       | See 'Overview of the Problem' above. |                                         |

|                                                 |                                                                                                                                              |                                                                                                                                                                                                                                                                                                         |                                                              |                            |                                          |       |
|-------------------------------------------------|----------------------------------------------------------------------------------------------------------------------------------------------|---------------------------------------------------------------------------------------------------------------------------------------------------------------------------------------------------------------------------------------------------------------------------------------------------------|--------------------------------------------------------------|----------------------------|------------------------------------------|-------|
| <b>Benefits and harms</b><br>(see below)        | Is there important uncertainty or variability in how much patients, researchers, clinicians and stake holders value the main outcomes?       | <ul style="list-style-type: none"> <li>○ Important uncertainty or variability</li> <li>○ Possibly important uncertainty or variability</li> <li>● <b>Probably no important uncertainty of variability</b></li> <li>○ No important uncertainty of variability</li> <li>○ No known undesirable</li> </ul> | <b>Relative importance of the main outcomes of interest:</b> |                            |                                          | None. |
|                                                 |                                                                                                                                              |                                                                                                                                                                                                                                                                                                         | <b>Outcome</b>                                               | <b>Relative Importance</b> | <b>Certainty of the evidence (GRADE)</b> |       |
|                                                 |                                                                                                                                              |                                                                                                                                                                                                                                                                                                         | Falls                                                        | Critical                   | ⊕⊕○○<br>LOW                              |       |
|                                                 |                                                                                                                                              |                                                                                                                                                                                                                                                                                                         | Community                                                    | Critical                   | ⊕⊕○○<br>LOW                              |       |
|                                                 |                                                                                                                                              |                                                                                                                                                                                                                                                                                                         | Hospital                                                     | Critical                   | ⊕⊕○○<br>LOW                              |       |
|                                                 |                                                                                                                                              |                                                                                                                                                                                                                                                                                                         | Long-term care                                               | Critical                   | ⊕⊕○○<br>LOW                              |       |
|                                                 |                                                                                                                                              |                                                                                                                                                                                                                                                                                                         |                                                              |                            | ○○○○<br>MODERATE                         |       |
|                                                 |                                                                                                                                              |                                                                                                                                                                                                                                                                                                         |                                                              |                            | ○○○○<br>MODERATE                         |       |
|                                                 |                                                                                                                                              |                                                                                                                                                                                                                                                                                                         |                                                              |                            | ○○○○<br>MODERATE                         |       |
|                                                 |                                                                                                                                              |                                                                                                                                                                                                                                                                                                         |                                                              |                            | ○○○○<br>MODERATE                         |       |
| What is the overall certainty of this evidence? | <ul style="list-style-type: none"> <li>○ No studies</li> <li>○ Very low</li> <li>● <b>Low</b></li> <li>○ Moderate</li> <li>○ High</li> </ul> |                                                                                                                                                                                                                                                                                                         |                                                              |                            |                                          |       |

|                                                                                                         |                                                                                                                                                                                                                                                       |                                                                                                                                                                  |                                         |                                  |                                                                                                        |                                                  |
|---------------------------------------------------------------------------------------------------------|-------------------------------------------------------------------------------------------------------------------------------------------------------------------------------------------------------------------------------------------------------|------------------------------------------------------------------------------------------------------------------------------------------------------------------|-----------------------------------------|----------------------------------|--------------------------------------------------------------------------------------------------------|--------------------------------------------------|
|                                                                                                         | How substantial are the desirable anticipated effects of the intervention?                                                                                                                                                                            | <ul style="list-style-type: none"> <li>○ Large</li> <li>○ Moderate</li> <li>● <b>Small</b></li> <li>○ Trivial</li> <li>○ Varies</li> <li>○ Don't know</li> </ul> | <i>Summary of findings (GRADE): 1C</i>  |                                  |                                                                                                        |                                                  |
|                                                                                                         | How substantial are the undesirable anticipated effects of the intervention?                                                                                                                                                                          | <ul style="list-style-type: none"> <li>● <b>Trivial</b></li> <li>○ Small</li> <li>○ Moderate</li> <li>○ Large</li> <li>○ Varies</li> <li>○ Don't know</li> </ul> | <b>Outcome</b>                          | <b>N<sub>o</sub> of patients</b> |                                                                                                        | <b>Effect</b>                                    |
|                                                                                                         |                                                                                                                                                                                                                                                       |                                                                                                                                                                  |                                         | <b>Intervention</b>              | <b>Control</b>                                                                                         | <b>Relative / Absolute (95% CI)</b>              |
|                                                                                                         |                                                                                                                                                                                                                                                       |                                                                                                                                                                  | Community (Number of fallers)           |                                  |                                                                                                        | RR: 1.05<br>(0.85 – 1.29)<br>I <sup>2</sup> = 0% |
|                                                                                                         |                                                                                                                                                                                                                                                       |                                                                                                                                                                  | Community (Number of injurious fallers) |                                  |                                                                                                        | RR: 0.95<br>(0.70 – 1.27)<br>I <sup>2</sup> = 0% |
|                                                                                                         |                                                                                                                                                                                                                                                       | Hospital (number of fallers)                                                                                                                                     |                                         |                                  | RR: 0.97<br>(0.74 – 1.28)<br>I <sup>2</sup> = 15%<br>RR: 0.50<br>(0.07 – 3.50)<br>I <sup>2</sup> = 72% |                                                  |
| Does the balance between desirable effects and undesirable effects favour the option of the comparison? | <ul style="list-style-type: none"> <li>○ Favours the option</li> <li>● <b>Probably favours the option</b></li> <li>○ Does not favour either</li> <li>○ Probably favours the comparison</li> <li>○ Favours the comparison</li> <li>○ Varies</li> </ul> | Long-term care (number of fallers)                                                                                                                               |                                         |                                  | RR: 0.86<br>(0.72 – 1.02)<br>I <sup>2</sup> = 0%                                                       |                                                  |
|                                                                                                         |                                                                                                                                                                                                                                                       | Long-term care (number of falls)                                                                                                                                 |                                         |                                  | RR: 0.93<br>(0.64 – 1.35)<br>I <sup>2</sup> = 92%                                                      |                                                  |

|                                                                        |                                                                                                                                                                                |                                                                                                                                                                                                                                                                             |                                                                                                                                              |  |
|------------------------------------------------------------------------|--------------------------------------------------------------------------------------------------------------------------------------------------------------------------------|-----------------------------------------------------------------------------------------------------------------------------------------------------------------------------------------------------------------------------------------------------------------------------|----------------------------------------------------------------------------------------------------------------------------------------------|--|
| Values and preferences                                                 | Is there similarity about how much patients, researchers, clinicians and stake holders value the main Outcomes?<br>Also include adverse effects and burden of the intervention | <ul style="list-style-type: none"> <li>○ No</li> <li>○ Probably no</li> <li>○ Uncertain</li> <li>● <b>Probably yes</b></li> <li>○ Yes</li> <li>○ Varies</li> </ul>                                                                                                          |                                                                                                                                              |  |
|                                                                        | Resources                                                                                                                                                                      | What is the certainty of the evidence of resources requirements (costs)?                                                                                                                                                                                                    | <ul style="list-style-type: none"> <li>● <b>No studies</b></li> <li>○ Very low</li> <li>○ Low</li> <li>○ Moderate</li> <li>○ High</li> </ul> |  |
| Does the cost effectiveness favour the intervention or the comparison? |                                                                                                                                                                                | <ul style="list-style-type: none"> <li>● <b>No studies</b></li> <li>○ Favours the option</li> <li>○ Probably favours the option</li> <li>○ Does not favour either</li> <li>○ Probably favours the comparison</li> <li>○ Favours the comparison</li> <li>○ Varies</li> </ul> |                                                                                                                                              |  |

|               |                                               |                                                                                                                                                                                                                                                                                                                             |  |  |
|---------------|-----------------------------------------------|-----------------------------------------------------------------------------------------------------------------------------------------------------------------------------------------------------------------------------------------------------------------------------------------------------------------------------|--|--|
| Equity        | What would be the impact on health equity?    | <ul style="list-style-type: none"> <li><input type="radio"/> Increased</li> <li><input type="radio"/> Probably increased</li> <li><input checked="" type="radio"/> <b>Uncertain</b></li> <li><input type="radio"/> Probably reduced</li> <li><input type="radio"/> Reduced</li> <li><input type="radio"/> Varies</li> </ul> |  |  |
| Acceptability | Is the option acceptable to key stakeholders? | <ul style="list-style-type: none"> <li><input type="radio"/> No</li> <li><input type="radio"/> Probably no</li> <li><input type="radio"/> Uncertain</li> <li><input checked="" type="radio"/> <b>Probably yes</b></li> <li><input type="radio"/> Yes</li> <li><input type="radio"/> Varies</li> </ul>                       |  |  |

|             |                                            |                                                                                                                                                                                                                                                                                                       |  |  |
|-------------|--------------------------------------------|-------------------------------------------------------------------------------------------------------------------------------------------------------------------------------------------------------------------------------------------------------------------------------------------------------|--|--|
| Feasibility | Is the intervention feasible to implement? | <ul style="list-style-type: none"> <li><input type="radio"/> No</li> <li><input type="radio"/> Probably no</li> <li><input type="radio"/> Uncertain</li> <li><input checked="" type="radio"/> <b>Probably yes</b></li> <li><input type="radio"/> Yes</li> <li><input type="radio"/> Varies</li> </ul> |  |  |
|-------------|--------------------------------------------|-------------------------------------------------------------------------------------------------------------------------------------------------------------------------------------------------------------------------------------------------------------------------------------------------------|--|--|

**Should \_\_\_ be recommended for older adults to prevent and manage falls?**

| Type of recommendation        | Strong recommendation against the intervention<br><input type="radio"/>                                                                                                                                                                                                                                                                                                                                                                                                                                                                                                                                                                                                                                                                                                                                                                                            | Weak recommendation against the intervention<br><input type="radio"/> | Conditional recommendation for either the intervention or the comparison<br><input type="radio"/> | Weak recommendation for the intervention<br><input type="radio"/> | Strong recommendation for the intervention<br><input checked="" type="radio"/> |
|-------------------------------|--------------------------------------------------------------------------------------------------------------------------------------------------------------------------------------------------------------------------------------------------------------------------------------------------------------------------------------------------------------------------------------------------------------------------------------------------------------------------------------------------------------------------------------------------------------------------------------------------------------------------------------------------------------------------------------------------------------------------------------------------------------------------------------------------------------------------------------------------------------------|-----------------------------------------------------------------------|---------------------------------------------------------------------------------------------------|-------------------------------------------------------------------|--------------------------------------------------------------------------------|
| Recommendation                | Recommendation 4: We recommend that in long-term care residents, the falls prevention strategy should always include rational deprescribing of fall-risk-increasing drugs. GRADE: 1C                                                                                                                                                                                                                                                                                                                                                                                                                                                                                                                                                                                                                                                                               |                                                                       |                                                                                                   |                                                                   |                                                                                |
| Justification                 | In a systematic review and meta-analysis on the effectiveness of deprescribing as a single intervention in falls prevention, no significant associations between medication reviews in any of the geriatric care settings and fall outcomes were found. <sup>37</sup> However, there was a trend for a lower number of fallers in the meta-analysis assessing medication reviews in long-term care, possibly indicating that in a frail subgroup of older adults, rational deprescribing might be effective also as a single intervention. Furthermore, several other studies with heterogeneous interventions and results not included in the meta-analyses were identified. Since the conducted studies are very heterogeneous, it is difficult to estimate the effect of deprescribing as a single intervention. The health benefits likely outweigh the harms. |                                                                       |                                                                                                   |                                                                   |                                                                                |
| Subgroup considerations       | The recommendation is valid for the long-term care setting (including residential care and nursing homes). Since there was a trend for a lower number of fallers in the meta-analysis assessing medication reviews in long-term care only. For frail subgroups residing in long-term care rational deprescribing might be performed as a stand-alone intervention.                                                                                                                                                                                                                                                                                                                                                                                                                                                                                                 |                                                                       |                                                                                                   |                                                                   |                                                                                |
| Implementation considerations | The interventions should involve the individual, their representatives, and healthcare professionals to focus on the multidisciplinary team-centred approach to facilitate the implementation. Education and engagement are essential for the implementation uptake of a complex intervention such as a medication review. <sup>40</sup> For successful implementation, education of both patients and health care professionals is essential. <sup>18</sup> Given the complexity of the intervention, supporting structured tools (such as STOPPFall) are warranted accompanied with appropriate training. <sup>1, 41</sup> Also, allocation of sufficient time and resources is necessary to optimize success rate and effectiveness.                                                                                                                            |                                                                       |                                                                                                   |                                                                   |                                                                                |
| Monitoring and evaluation     | Long-term success of rational deprescribing can be increased by provision of monitoring, support, and documentation. For successful long-term effect of the deprescribing intervention, a medication review should be provided regularly, at least yearly.                                                                                                                                                                                                                                                                                                                                                                                                                                                                                                                                                                                                         |                                                                       |                                                                                                   |                                                                   |                                                                                |

|                     |                                                                                              |
|---------------------|----------------------------------------------------------------------------------------------|
| Research Priorities | For future studies, more comparability is warranted in terms of targeted medication classes. |
|---------------------|----------------------------------------------------------------------------------------------|

### References

1. Seppala LJ, Petrovic M, Ryg J, Bahat G, Topinkova E, Szczerbinska K, et al. STOPPFall (Screening Tool of Older Persons Prescriptions in older adults with high fall risk): a Delphi study by the EuGMS Task and Finish Group on Fall-Risk-Increasing Drugs. *Age Ageing*. 2021 Jun 28;50(4):1189-99.
2. By the American Geriatrics Society Beers Criteria Update Expert P. American Geriatrics Society 2019 Updated AGS Beers Criteria(R) for Potentially Inappropriate Medication Use in Older Adults. *J Am Geriatr Soc*. 2019 Apr;67(4):674-94.
3. O'Mahony D, O'Sullivan D, Byrne S, O'Connor MN, Ryan C, Gallagher P. STOPP/START criteria for potentially inappropriate prescribing in older people: version 2. *Age Ageing*. 2015 Mar;44(2):213-8.
4. Pazan F, Wehling M. The FORTA (Fit FOR The Aged) App as a Clinical Tool to Optimize Complex Medications in Older People. *J Am Med Dir Assoc*. 2017 Oct 1;18(10):893.
5. Johanna J. Meds75+. Finnish Medicines Agency, Fimea; 2020; Available from: [https://www.fimea.fi/web/en/databases\\_and\\_registeries/medicines\\_information/database\\_of\\_medication\\_for\\_older\\_persons](https://www.fimea.fi/web/en/databases_and_registeries/medicines_information/database_of_medication_for_older_persons).
6. Cameron ID, Dyer SM, Panagoda CE, Murray GR, Hill KD, Cumming RG, et al. Interventions for preventing falls in older people in care facilities and hospitals. *Cochrane Database Syst Rev*. 2018 Sep 7;9:CD005465.
7. de Vries M, Seppala LJ, Daams JG, van de Glind EMM, Masud T, van der Velde N, et al. Fall-Risk-Increasing Drugs: A Systematic Review and Meta-Analysis: I. Cardiovascular Drugs. *J Am Med Dir Assoc*. 2018 Apr;19(4):371 e1- e9.
8. Deandrea S, Lucenteforte E, Bravi F, Foschi R, La Vecchia C, Negri E. Risk factors for falls in community-dwelling older people: a systematic review and meta-analysis. *Epidemiology*. 2010 Sep;21(5):658-68.
9. Seppala LJ, van de Glind EMM, Daams JG, Ploegmakers KJ, de Vries M, Wermelink A, et al. Fall-Risk-Increasing Drugs: A Systematic Review and Meta-analysis: III. Others. *J Am Med Dir Assoc*. 2018 Apr;19(4):372 e1- e8.
10. Seppala LJ, Wermelink A, de Vries M, Ploegmakers KJ, van de Glind EMM, Daams JG, et al. Fall-Risk-Increasing Drugs: A Systematic Review and Meta-Analysis: II. Psychotropics. *J Am Med Dir Assoc*. 2018 Apr;19(4):371 e11- e17.
11. Kojima G. Frailty as a Predictor of Future Falls Among Community-Dwelling Older People: A Systematic Review and Meta-Analysis. *J Am Med Dir Assoc*. 2015 Dec;16(12):1027-33.
12. Zazzara MB, Palmer K, Vetrano DL, Carfi A, Graziano O. Adverse drug reactions in older adults: a narrative review of the literature. *Eur Geriatr Med*. 2021 Jun;12(3):463-73.
13. Bahat G, Ilhan B, Erdogan T, Halil M, Savas S, Ulger Z, et al. Turkish inappropriate medication use in the elderly (TIME) criteria to improve prescribing in older adults: TIME-to-STOP/TIME-to-START. *Eur Geriatr Med*. 2020 Jun;11(3):491-8.
14. Kaufmann CP, Tremp R, Hersberger KE, Lampert ML. Inappropriate prescribing: a systematic overview of published assessment tools. *Eur J Clin Pharmacol*. 2014 Jan;70(1):1-11.
15. Frankenthal D, Lerman Y, Kalendaryev E, Lerman Y. Intervention with the screening tool of older persons potentially inappropriate prescriptions/screening tool to alert doctors to right treatment criteria in elderly residents of a chronic geriatric facility: a randomized clinical trial. *J Am Geriatr Soc*. 2014 Sep;62(9):1658-65.
16. Michalek C, Wehling M, Schlitzer J, Frohnhofen H. Effects of "Fit FOR The Aged" (FORTA) on pharmacotherapy and clinical endpoints--a pilot randomized controlled study. *Eur J Clin Pharmacol*. 2014 Oct;70(10):1261-7.
17. Curtin D BS, O'Mahony D. Identifying Explicit Criteria for the Prevention of Falls. In: Huang AR ML, editor. Medication-related falls in older people. Switzerland: Springer International Publishing. p. 179-88.
18. Seppala LJ, van der Velde N, Masud T, Blain H, Petrovic M, van der Cammen TJ, et al. EuGMS Task and Finish group on Fall-Risk-Increasing Drugs (FRIDs): Position on Knowledge Dissemination, Management, and Future Research. *Drugs Aging*. 2019 Apr;36(4):299-307.
19. Damoiseaux-Volman BA, Raven K, Sent D, Medlock S, Romijn JA, Abu-Hanna A, et al. Potentially inappropriate medications and their effect on falls during hospital admission. *Age and ageing*. 2021 Oct 18.
20. Ibrahim K, Cox NJ, Stevenson JM, Lim S, Fraser SDS, Roberts HC. A systematic review of the evidence for deprescribing interventions among older people living with frailty. *BMC geriatrics*. 2021 2021/04/17;21(1):258.

21. Bloomfield HE, Greer N, Linsky AM, Bolduc J, Naidl T, Vardeny O, et al. Deprescribing for Community-Dwelling Older Adults: a Systematic Review and Meta-analysis. *Journal of General Internal Medicine*. 2020 2020/11/01;35(11):3323-32.
22. NICE guideline. Medicines optimisation: the safe and effective use of medicines to enable the best possible outcomes.
23. NHS Derby and Derbyshire. CCG Medicines Management Team. Deprescribing: A Practical Guide.
24. Jennings ELM, Murphy KD, Gallagher P, O'Mahony D. In-hospital adverse drug reactions in older adults; prevalence, presentation and associated drugs-a systematic review and meta-analysis. *Age Ageing*. 2020 Oct 23;49(6):948-58.
25. Liew TM, Lee CS, Goh SKL, Chang ZY. The prevalence and impact of potentially inappropriate prescribing among older persons in primary care settings: multilevel meta-analysis. *Age Ageing*. 2020 Jul 1;49(4):570-9.
26. Parekh N, Gahagan B, Ward L, Ali K. 'They must help if the doctor gives them to you': a qualitative study of the older person's lived experience of medication-related problems. *Age Ageing*. 2019 Jan 1;48(1):147-51.
27. Reeve E, Gnjdic D, Long J, Hilmer S. A systematic review of the emerging definition of 'deprescribing' with network analysis: implications for future research and clinical practice. *British journal of clinical pharmacology*. 2015;80(6):1254-68.
28. Dautzenberg L, Beglinger S, Tsokani S, Zevgiti S, Raijmann R, Rodondi N, et al. Interventions for preventing falls and fall-related fractures in community-dwelling older adults: A systematic review and network meta-analysis. *Journal of the American Geriatrics Society*. 2021 Jul 28.
29. Montero-Odasso M, van der Velde N, Alexander NB, Becker C, Blain H, Camicioli R, et al. New horizons in falls prevention and management for older adults: a global initiative. *Age Ageing*. 2021 Sep 11;50(5):1499-507.
30. Montero-Odasso MM, Kamkar N, Pieruccini-Faria F, Osman A, Sarquis-Adamson Y, Close J, et al. Evaluation of Clinical Practice Guidelines on Fall Prevention and Management for Older Adults: A Systematic Review. *JAMA Netw Open*. 2021 Dec 1;4(12):e2138911.
31. WHO Collaborating Centre for Drug Statistics Methodology. ATC [cited 2016 1 September]; Available from: [http://www.whocc.no/atc/structure\\_and\\_principles/](http://www.whocc.no/atc/structure_and_principles/).
32. World Health Organization. (2021) Step safely: strategies for preventing and managing falls across the life-course. World Health Organization. <https://apps.who.int/iris/handle/10665/340962>. License: CC BY-NC-SA 3.0 IGO.
33. World Health Organization. <https://www.who.int/publications/i/item/WHO-MCA-17.06.04>. License: CC BY-NC-SA 3.0 IGO.
34. Tinetti ME, Han L, Lee DS, McAvay GJ, Peduzzi P, Gross CP, et al. Antihypertensive medications and serious fall injuries in a nationally representative sample of older adults. *JAMA Intern Med*. 2014 Apr;174(4):588-95.
35. Beuscart JB, Pelayo S, Robert L, Thevelin S, Marien S, Dalleur O. Medication review and reconciliation in older adults. *Eur Geriatr Med*. 2021 Jun;12(3):499-507.
36. Gillespie LD, Robertson MC, Gillespie WJ, Sherrington C, Gates S, Clemson LM, et al. Interventions for preventing falls in older people living in the community. *Cochrane Database Syst Rev*. 2012 Sep 12(9):CD007146.
37. Seppala LJ KN, van Poelgeest E, et al. A systematic review and meta-analyses assessing the effectiveness of deprescribing in falls prevention in older people. *Ageing Research Reviews*. Submitted.
38. Iyer S, Naganathan V, McLachlan AJ, Le Couteur DG. Medication withdrawal trials in people aged 65 years and older: a systematic review. *Drugs Aging*. 2008;25(12):1021-31.
39. Seppala LJ vdVN. Chapter 3. Fall-risk-increasing Drugs – Background, Current evidence on deprescribing and Future perspectives. In: P E, editor. *Integrated Care and Fall Prevention in Active and Healthy Aging* 2021 (in press).
40. Sawan M, Reeve E, Turner J, Todd A, Steinman MA, Petrovic M, et al. A systems approach to identifying the challenges of implementing deprescribing in older adults across different health-care settings and countries: a narrative review. *Expert Rev Clin Pharmacol*. 2020 Mar;13(3):233-45.
41. Tinetti ME, Gordon C, Sogolow E, Lapin P, Bradley EH. Fall-risk evaluation and management: challenges in adopting geriatric care practices. *Gerontologist*. 2006 Dec;46(6):717-25.
42. Bell HT, Steinsbekk A, Granas AG. Factors influencing prescribing of fall-risk-increasing drugs to the elderly: A qualitative study. *Scand J Prim Health Care*. 2015 Jun;33(2):107-14.
43. Reeve E, To J, Hendrix I, Shakib S, Roberts MS, Wiese MD. Patient barriers to and enablers of deprescribing: a systematic review. *Drugs Aging*. 2013 Oct;30(10):793-807.
44. Boye ND, van der Velde N, de Vries OJ, van Lieshout EM, Hartholt KA, Mattace-Raso FU, et al. Effectiveness of medication withdrawal in older fallers: results from the Improving Medication Prescribing to reduce Risk Of FALLs (IMPROveFALL) trial. *Age Ageing*. 2017 Jan 10;46(1):142-6.
45. Reeve E, Shakib S, Hendrix I, Roberts MS, Wiese MD. Review of deprescribing processes and development of an evidence-based, patient-centred deprescribing process. *Br J Clin Pharmacol*. 2014 Oct;78(4):738-47.



## Working Group 3: Cardiovascular Risk Factors for Falls

### Recommendations for Working Group 3: Cardiovascular Risk Factors for Falls

**Recommendation 1 (Assessment):** We recommend, as part of a multifactorial falls risk assessment, that a cardiovascular assessment that initially includes cardiac history, auscultation, lying and standing orthostatic blood pressure, and surface 12-lead electrocardiogram should be performed. **GRADE 1B.**

**Recommendation 2 (Assessment):** In the absence of abnormalities on initial cardiovascular assessment, no further cardiovascular assessment is required, unless syncope is suspected (i.e. described or witnessed syncope/pre-syncope or recurrent unexplained falls). **GRADE: 1C**

| <i>Population:</i>             | Older adults aged $\geq 60$ years                                            | <i>Objective:</i> The main goal of these recommendations is to assist health care professionals in the cardiovascular assessment and management of older patients who are at risk of falling or have fallen. |                                                                                                                                                                                                                                                                                                                                                                                                                                                                                                                                                                                                                                                                                                                                                                                                                                                                                 |                                           |
|--------------------------------|------------------------------------------------------------------------------|--------------------------------------------------------------------------------------------------------------------------------------------------------------------------------------------------------------|---------------------------------------------------------------------------------------------------------------------------------------------------------------------------------------------------------------------------------------------------------------------------------------------------------------------------------------------------------------------------------------------------------------------------------------------------------------------------------------------------------------------------------------------------------------------------------------------------------------------------------------------------------------------------------------------------------------------------------------------------------------------------------------------------------------------------------------------------------------------------------|-------------------------------------------|
| <i>Intervention:</i>           | A geriatric multidimensional assessment                                      |                                                                                                                                                                                                              |                                                                                                                                                                                                                                                                                                                                                                                                                                                                                                                                                                                                                                                                                                                                                                                                                                                                                 |                                           |
| <i>Comparison:</i>             | Comparison not applicable                                                    |                                                                                                                                                                                                              |                                                                                                                                                                                                                                                                                                                                                                                                                                                                                                                                                                                                                                                                                                                                                                                                                                                                                 |                                           |
| <i>Main outcomes:</i>          | Falls                                                                        |                                                                                                                                                                                                              |                                                                                                                                                                                                                                                                                                                                                                                                                                                                                                                                                                                                                                                                                                                                                                                                                                                                                 |                                           |
| <i>Setting:</i>                | Any setting                                                                  |                                                                                                                                                                                                              |                                                                                                                                                                                                                                                                                                                                                                                                                                                                                                                                                                                                                                                                                                                                                                                                                                                                                 |                                           |
| <i>Perspective:</i>            | Cardiovascular problems and risk of falls in community dwelling older adults |                                                                                                                                                                                                              |                                                                                                                                                                                                                                                                                                                                                                                                                                                                                                                                                                                                                                                                                                                                                                                                                                                                                 |                                           |
| Decision Domain                |                                                                              | Judgements                                                                                                                                                                                                   | Research Evidence                                                                                                                                                                                                                                                                                                                                                                                                                                                                                                                                                                                                                                                                                                                                                                                                                                                               | Additional Considerations /Explanations   |
| <b>Priority of the Problem</b> | Is the problem a priority?                                                   | <ul style="list-style-type: none"> <li>○ No</li> <li>○ Probably no</li> <li>○ Uncertain</li> <li>○ Probably yes</li> <li>● <b>Yes</b></li> <li>○ Varies</li> </ul>                                           | <ol style="list-style-type: none"> <li>1. Cardiovascular disorders such as orthostatic hypotension, bradycardia, tachycardia and structural heart problems have all been implicated to varying degrees in falls risk; therefore the minimum tests required to assess these cardiovascular disorders are cardiac auscultation (to detect underlying murmurs), orthostatic blood pressure measurement (to detect orthostatic hypotension) and surface electrocardiogram (to detect rate and rhythm abnormalities).</li> <li>2. There is strong consensus that the diagnosis of carotid sinus syndrome (CSS) requires both the reproduction of spontaneous symptoms during carotid sinus stimulation (CSM) and clinical features of spontaneous syncope or unexplained falls compatible with a reflex mechanism. This is consistent with the recommendation of 2018 ESC</li> </ol> | Recommendations based on expert opinions. |

|  |  |  |                                                                                                                                                                                                                                                                                                                                                                                                                                                                                                                                                                                                                                                                                                                                                                                                                                                                                                    |  |
|--|--|--|----------------------------------------------------------------------------------------------------------------------------------------------------------------------------------------------------------------------------------------------------------------------------------------------------------------------------------------------------------------------------------------------------------------------------------------------------------------------------------------------------------------------------------------------------------------------------------------------------------------------------------------------------------------------------------------------------------------------------------------------------------------------------------------------------------------------------------------------------------------------------------------------------|--|
|  |  |  | <p>guidelines.<sup>4</sup> Patients with falls due to CSS may be unaware of loss of consciousness produced during CSM. The quality of evidence is moderate and is given by studies of ECG correlation between CSM and spontaneous events, and indirectly by studies of efficacy of cardiac pacing. Further research is likely to have an important impact on our confidence in the estimation of effect and may change the estimate.</p> <p>3. Orthostatic hypotension is consistently associated with falls, when assessed using the beat to beat methods for blood pressure measurement. Beat to beat methods are superior to traditional oscillometer and sphygmomanometer methods for the assessment of orthostatic hypotension in the context of falls risk. The association between falls and orthostatic hypotension measured using oscillometer or sphygmomanometer is not consistent.</p> |  |
|--|--|--|----------------------------------------------------------------------------------------------------------------------------------------------------------------------------------------------------------------------------------------------------------------------------------------------------------------------------------------------------------------------------------------------------------------------------------------------------------------------------------------------------------------------------------------------------------------------------------------------------------------------------------------------------------------------------------------------------------------------------------------------------------------------------------------------------------------------------------------------------------------------------------------------------|--|

|                                          |                                                                                                                                        |                                                                                                                                                                                                                                                                                                         |                                                              |  |  |                                       |
|------------------------------------------|----------------------------------------------------------------------------------------------------------------------------------------|---------------------------------------------------------------------------------------------------------------------------------------------------------------------------------------------------------------------------------------------------------------------------------------------------------|--------------------------------------------------------------|--|--|---------------------------------------|
| <b>Benefits and harms</b><br>(see below) | Is there important uncertainty or variability in how much patients, researchers, clinicians and stake holders value the main outcomes? | <ul style="list-style-type: none"> <li>○ Important uncertainty or variability</li> <li>○ Possibly important uncertainty or variability</li> <li>● <b>Probably no important uncertainty of variability</b></li> <li>○ No important uncertainty of variability</li> <li>○ No known undesirable</li> </ul> | <b>Relative importance of the main outcomes of interest:</b> |  |  | Ratings are based on expert opinions. |
|                                          |                                                                                                                                        |                                                                                                                                                                                                                                                                                                         |                                                              |  |  |                                       |
|                                          |                                                                                                                                        |                                                                                                                                                                                                                                                                                                         |                                                              |  |  |                                       |
|                                          |                                                                                                                                        |                                                                                                                                                                                                                                                                                                         |                                                              |  |  |                                       |
|                                          |                                                                                                                                        |                                                                                                                                                                                                                                                                                                         |                                                              |  |  |                                       |
|                                          |                                                                                                                                        |                                                                                                                                                                                                                                                                                                         |                                                              |  |  |                                       |
|                                          |                                                                                                                                        |                                                                                                                                                                                                                                                                                                         |                                                              |  |  |                                       |
|                                          |                                                                                                                                        |                                                                                                                                                                                                                                                                                                         |                                                              |  |  |                                       |
|                                          |                                                                                                                                        |                                                                                                                                                                                                                                                                                                         |                                                              |  |  |                                       |
|                                          |                                                                                                                                        |                                                                                                                                                                                                                                                                                                         |                                                              |  |  |                                       |
|                                          | What is the overall certainty of this evidence?                                                                                        | <ul style="list-style-type: none"> <li>● <b>No studies</b></li> <li>○ Very low</li> <li>○ Low</li> <li>○ Moderate</li> <li>○ High</li> </ul>                                                                                                                                                            |                                                              |  |  |                                       |
|                                          |                                                                                                                                        |                                                                                                                                                                                                                                                                                                         |                                                              |  |  |                                       |
|                                          |                                                                                                                                        |                                                                                                                                                                                                                                                                                                         |                                                              |  |  |                                       |
|                                          |                                                                                                                                        |                                                                                                                                                                                                                                                                                                         |                                                              |  |  |                                       |
|                                          |                                                                                                                                        |                                                                                                                                                                                                                                                                                                         |                                                              |  |  |                                       |
|                                          |                                                                                                                                        |                                                                                                                                                                                                                                                                                                         |                                                              |  |  |                                       |
|                                          |                                                                                                                                        |                                                                                                                                                                                                                                                                                                         |                                                              |  |  |                                       |

|                                                                                                         |                                                                                                                                                                                                                              |                                     |                                                                                       |                |                                                                        |                                                                                                                                                                                                                                                    |
|---------------------------------------------------------------------------------------------------------|------------------------------------------------------------------------------------------------------------------------------------------------------------------------------------------------------------------------------|-------------------------------------|---------------------------------------------------------------------------------------|----------------|------------------------------------------------------------------------|----------------------------------------------------------------------------------------------------------------------------------------------------------------------------------------------------------------------------------------------------|
| How substantial are the desirable anticipated effects of the intervention?                              | <ul style="list-style-type: none"> <li>○ Large</li> <li>○ Moderate</li> <li>○ Small</li> <li>○ Trivial</li> <li>○ Varies</li> <li>● <b>Don't know</b></li> </ul>                                                             | <b>Summary of findings (GRADE):</b> |                                                                                       |                |                                                                        |                                                                                                                                                                                                                                                    |
| How substantial are the undesirable anticipated effects of the intervention?                            | <ul style="list-style-type: none"> <li>○ Trivial</li> <li>○ Small</li> <li>○ Moderate</li> <li>○ Large</li> <li>○ Varies</li> <li>● <b>Don't know</b></li> </ul>                                                             | <b>Outcome</b>                      | <b>Nº of patients</b>                                                                 |                | <b>Effect</b>                                                          |                                                                                                                                                                                                                                                    |
|                                                                                                         |                                                                                                                                                                                                                              |                                     | <b>Intervention</b>                                                                   | <b>Control</b> | <b>Relative / Absolute (95% CI)</b>                                    |                                                                                                                                                                                                                                                    |
|                                                                                                         |                                                                                                                                                                                                                              | Non-accidental falls <sup>14</sup>  | 211 participants. Intervention and control N/A (observational study: case-control)    |                | Atrial fibrillation associated with falls: OR 1.16 [1.0–2.7] p=0.04    |                                                                                                                                                                                                                                                    |
|                                                                                                         |                                                                                                                                                                                                                              | Any fall <sup>8</sup>               | 401 participants. Intervention and control N/A (observational study: cross-sectional) |                | Atrial fibrillation associated with falls: OR 1.98 (1.08-3.63) p=0.025 |                                                                                                                                                                                                                                                    |
|                                                                                                         |                                                                                                                                                                                                                              | Any fall <sup>18</sup>              | 733 participants. Intervention and control N/A (observational study: cross-sectional) |                | Congestive heart failure associated with falls: RR 2.16 (1.15-4.04)    |                                                                                                                                                                                                                                                    |
|                                                                                                         |                                                                                                                                                                                                                              | Any fall *(Xu 2015)                 | 447 participants. Intervention and control N/A (observational study: cohort study)    |                | Stroke associated with falls: RR 2.43 1.51–3.93 p<0.001                |                                                                                                                                                                                                                                                    |
| Does the balance between desirable effects and undesirable effects favour the option of the comparison? | <ul style="list-style-type: none"> <li>○ Favours the option</li> <li>○ Probably favours the option</li> <li>○ Does not favour either</li> <li>○ Probably favours the comparison</li> <li>○ Favours the comparison</li> </ul> |                                     |                                                                                       |                |                                                                        | * Xu W, Chen D-W, Jin Y-B, Dong Z-J, Zhang W-J, Chen J-W, et al. Incidence and related clinical factors of falls among older Chinese veterans in military communities: a prospective study. Journal of physical therapy science. 2015;27(2):331-9. |

|  |  |                                                                                      |  |  |  |  |  |
|--|--|--------------------------------------------------------------------------------------|--|--|--|--|--|
|  |  | <ul style="list-style-type: none"><li>○ Varies</li><li>● <b>Don't know</b></li></ul> |  |  |  |  |  |
|--|--|--------------------------------------------------------------------------------------|--|--|--|--|--|

|                                                                                                    |                                                                                                                                                                                        |                                                                                                                                                                                                                                                                             |                      |  |
|----------------------------------------------------------------------------------------------------|----------------------------------------------------------------------------------------------------------------------------------------------------------------------------------------|-----------------------------------------------------------------------------------------------------------------------------------------------------------------------------------------------------------------------------------------------------------------------------|----------------------|--|
| <p style="writing-mode: vertical-rl; transform: rotate(180deg);"><b>Values and preferences</b></p> | <p>Is there similarity about how much patients, researchers, clinicians and stake holders value the main Outcomes?<br/>Also include adverse effects and burden of the intervention</p> | <ul style="list-style-type: none"> <li>○ No</li> <li>○ Probably no</li> <li>● <b>Uncertain</b></li> <li>○ Probably yes</li> <li>○ Yes</li> <li>○ Varies</li> </ul>                                                                                                          | <p>Not measured.</p> |  |
| <p style="writing-mode: vertical-rl; transform: rotate(180deg);"><b>Resources</b></p>              | <p>What is the certainty of the evidence of resources requirements (costs)?</p>                                                                                                        | <ul style="list-style-type: none"> <li>● <b>No studies</b></li> <li>○ Very low</li> <li>○ Low</li> <li>○ Moderate</li> <li>○ High</li> </ul>                                                                                                                                |                      |  |
|                                                                                                    | <p>Does the cost effectiveness favour the intervention or the comparison?</p>                                                                                                          | <ul style="list-style-type: none"> <li>● <b>No studies</b></li> <li>○ Favours the option</li> <li>○ Probably favours the option</li> <li>○ Does not favour either</li> <li>○ Probably favours the comparison</li> <li>○ Favours the comparison</li> <li>○ Varies</li> </ul> |                      |  |

|               |                                               |                                                                                                                                                                                                                                                                                                                             |  |  |
|---------------|-----------------------------------------------|-----------------------------------------------------------------------------------------------------------------------------------------------------------------------------------------------------------------------------------------------------------------------------------------------------------------------------|--|--|
| Equity        | What would be the impact on health equity?    | <ul style="list-style-type: none"> <li><input type="radio"/> Increased</li> <li><input type="radio"/> Probably increased</li> <li><input checked="" type="radio"/> <b>Uncertain</b></li> <li><input type="radio"/> Probably reduced</li> <li><input type="radio"/> Reduced</li> <li><input type="radio"/> Varies</li> </ul> |  |  |
| Acceptability | Is the option acceptable to key stakeholders? | <ul style="list-style-type: none"> <li><input type="radio"/> No</li> <li><input type="radio"/> Probably no</li> <li><input type="radio"/> Uncertain</li> <li><input type="radio"/> Probably yes</li> <li><input checked="" type="radio"/> <b>Yes</b></li> <li><input type="radio"/> Varies</li> </ul>                       |  |  |

|             |                                            |                                                                                                                                                                                                                                                                                                       |  |  |
|-------------|--------------------------------------------|-------------------------------------------------------------------------------------------------------------------------------------------------------------------------------------------------------------------------------------------------------------------------------------------------------|--|--|
| Feasibility | Is the intervention feasible to implement? | <ul style="list-style-type: none"> <li><input type="radio"/> No</li> <li><input type="radio"/> Probably no</li> <li><input type="radio"/> Uncertain</li> <li><input checked="" type="radio"/> <b>Probably yes</b></li> <li><input type="radio"/> Yes</li> <li><input type="radio"/> Varies</li> </ul> |  |  |
|-------------|--------------------------------------------|-------------------------------------------------------------------------------------------------------------------------------------------------------------------------------------------------------------------------------------------------------------------------------------------------------|--|--|

**Should a cardiovascular assessment should be a part of a multifactorial falls risk assessment to determine possible cause and to reduce falls risks in older fallers be recommended for older adults to prevent and manage falls?**

| Type of recommendation        | Strong recommendation against the intervention<br><input type="radio"/>                                                                                                                                                                                                                                                                                                                                                                                                                                                                                                                                                                                                                                                                                                                                                                                                                                                                                                                                                                                                                                                                                                                                                                                                                                                                                                                                                                                                                                             | Weak recommendation against the intervention<br><input type="radio"/> | Conditional recommendation for either the intervention or the comparison<br><input type="radio"/> | Weak recommendation for the intervention<br><input type="radio"/> | Strong recommendation for the intervention<br><input checked="" type="radio"/> |
|-------------------------------|---------------------------------------------------------------------------------------------------------------------------------------------------------------------------------------------------------------------------------------------------------------------------------------------------------------------------------------------------------------------------------------------------------------------------------------------------------------------------------------------------------------------------------------------------------------------------------------------------------------------------------------------------------------------------------------------------------------------------------------------------------------------------------------------------------------------------------------------------------------------------------------------------------------------------------------------------------------------------------------------------------------------------------------------------------------------------------------------------------------------------------------------------------------------------------------------------------------------------------------------------------------------------------------------------------------------------------------------------------------------------------------------------------------------------------------------------------------------------------------------------------------------|-----------------------------------------------------------------------|---------------------------------------------------------------------------------------------------|-------------------------------------------------------------------|--------------------------------------------------------------------------------|
| Recommendation                | <p>Recommendation 1: We recommend, as part of a multifactorial falls risk assessment, that a cardiovascular assessment that initially includes cardiac history, auscultation, lying and standing orthostatic blood pressure, and surface 12-lead electrocardiogram should be performed. GRADE 1B.</p> <p>Recommendation 2: In the absence of abnormalities on initial cardiovascular assessment, no further cardiovascular assessment is required, unless syncope is suspected (i.e. described or witnessed syncope/pre-syncope or recurrent unexplained falls). GRADE 1C.</p>                                                                                                                                                                                                                                                                                                                                                                                                                                                                                                                                                                                                                                                                                                                                                                                                                                                                                                                                      |                                                                       |                                                                                                   |                                                                   |                                                                                |
| Justification                 | There is evidence suggesting that an association between cardiovascular disease and risk of falls in older adults.                                                                                                                                                                                                                                                                                                                                                                                                                                                                                                                                                                                                                                                                                                                                                                                                                                                                                                                                                                                                                                                                                                                                                                                                                                                                                                                                                                                                  |                                                                       |                                                                                                   |                                                                   |                                                                                |
| Subgroup considerations       |                                                                                                                                                                                                                                                                                                                                                                                                                                                                                                                                                                                                                                                                                                                                                                                                                                                                                                                                                                                                                                                                                                                                                                                                                                                                                                                                                                                                                                                                                                                     |                                                                       |                                                                                                   |                                                                   |                                                                                |
| Implementation considerations |                                                                                                                                                                                                                                                                                                                                                                                                                                                                                                                                                                                                                                                                                                                                                                                                                                                                                                                                                                                                                                                                                                                                                                                                                                                                                                                                                                                                                                                                                                                     |                                                                       |                                                                                                   |                                                                   |                                                                                |
| Monitoring and evaluation     | <ol style="list-style-type: none"> <li>1. Bradycardia or tachyarrhythmia can be captured with a surface electrocardiogram, telemetry or ambulatory heart rate monitoring – either by external loop recordings (if events are frequent) or internal loop recordings (for infrequent events). There is also an emerging role for the use of wearable devices over the coming years.</li> <li>2. If rate or rhythm disorders are intermittent it is likely that abnormalities will not be captured by a single surface electrocardiogram or 24 hour monitoring and longer term monitoring, likely to capture a fall related rate or rhythm change, is required.<sup>19</sup></li> <li>3. In many cases monitoring may be required over many months in which case an implantable monitoring device is preferred.<sup>123</sup></li> <li>4. We suggest that the assessment for orthostatic hypotension should be conducted as follows: Patients should be supine for at least 5 minutes, with baseline BP taken at this point. On standing, a first BP measurement should be taken as soon as possible (40 – 60 seconds), and two further readings at 1 and 3 minutes.<sup>124</sup></li> <li>5. We recommend that if there are signs suggestive of structural heart disease after auscultation or ECG an echocardiogram should be performed.</li> <li>6. In frail older people overall hypotension or post prandial hypotension may be associated with higher falls risk. New blood pressure targets are not</li> </ol> |                                                                       |                                                                                                   |                                                                   |                                                                                |



|                     |                                                                                                                                                                                                                                                                                                                                                                                                                                                                                                                                                                                                                                                                                                                                             |
|---------------------|---------------------------------------------------------------------------------------------------------------------------------------------------------------------------------------------------------------------------------------------------------------------------------------------------------------------------------------------------------------------------------------------------------------------------------------------------------------------------------------------------------------------------------------------------------------------------------------------------------------------------------------------------------------------------------------------------------------------------------------------|
|                     | <p>consistently associated with falls unless patients are frail.</p> <ol style="list-style-type: none"> <li>7. 24-hour ambulatory blood pressure measurement will assist in the evaluation of overall blood pressure variability and in determining the time periods during which blood pressure is excessively low.</li> <li>8. Another useful approach, to give the physician a more detailed overview of the patient's BP response to activities of daily living, may be to advise the patient to perform BP measurements at standardized times throughout the day, including pre and post meals, for a period of at least 2 weeks. We advise, where possible, to recreate the conditions that were associated with the fall.</li> </ol> |
| Research Priorities | Meta-analysis performed to compare the overall risk ratio and significance of cardiovascular diseases on fall risk.                                                                                                                                                                                                                                                                                                                                                                                                                                                                                                                                                                                                                         |

## Recommendations for Working Group 3: Cardiovascular Risk Factors for Falls

**Recommendation 3 (Assessment): We recommend that the further cardiovascular assessment for unexplained falls should be the same as that for syncope, in addition to the multifactorial falls risk assessment. GRADE: 1A**

| <b>Population:</b>             | Older adults aged $\geq 60$ years | <b>Objective:</b> The main goal of these recommendations is to assist health care professionals in the cardiovascular assessment and management of older patients who are at risk of falling or have fallen. |                                                                                                                                                                                                                                                                                                                                                                                                                                                                                                                                                                                                                                                                                                                                                                                                                                                                                                                                                                                                                                                                                                                                                          |                                         |
|--------------------------------|-----------------------------------|--------------------------------------------------------------------------------------------------------------------------------------------------------------------------------------------------------------|----------------------------------------------------------------------------------------------------------------------------------------------------------------------------------------------------------------------------------------------------------------------------------------------------------------------------------------------------------------------------------------------------------------------------------------------------------------------------------------------------------------------------------------------------------------------------------------------------------------------------------------------------------------------------------------------------------------------------------------------------------------------------------------------------------------------------------------------------------------------------------------------------------------------------------------------------------------------------------------------------------------------------------------------------------------------------------------------------------------------------------------------------------|-----------------------------------------|
| <b>Intervention:</b>           | Not applicable                    |                                                                                                                                                                                                              |                                                                                                                                                                                                                                                                                                                                                                                                                                                                                                                                                                                                                                                                                                                                                                                                                                                                                                                                                                                                                                                                                                                                                          |                                         |
| <b>Comparison:</b>             | Not applicable                    |                                                                                                                                                                                                              |                                                                                                                                                                                                                                                                                                                                                                                                                                                                                                                                                                                                                                                                                                                                                                                                                                                                                                                                                                                                                                                                                                                                                          |                                         |
| <b>Main outcomes:</b>          | Falls                             |                                                                                                                                                                                                              |                                                                                                                                                                                                                                                                                                                                                                                                                                                                                                                                                                                                                                                                                                                                                                                                                                                                                                                                                                                                                                                                                                                                                          |                                         |
| <b>Setting:</b>                | All settings                      |                                                                                                                                                                                                              |                                                                                                                                                                                                                                                                                                                                                                                                                                                                                                                                                                                                                                                                                                                                                                                                                                                                                                                                                                                                                                                                                                                                                          |                                         |
| <b>Perspective:</b>            | Population                        |                                                                                                                                                                                                              |                                                                                                                                                                                                                                                                                                                                                                                                                                                                                                                                                                                                                                                                                                                                                                                                                                                                                                                                                                                                                                                                                                                                                          |                                         |
| Decision Domain                |                                   | Judgements                                                                                                                                                                                                   | Research Evidence                                                                                                                                                                                                                                                                                                                                                                                                                                                                                                                                                                                                                                                                                                                                                                                                                                                                                                                                                                                                                                                                                                                                        | Additional Considerations /Explanations |
| <b>Priority of the Problem</b> | Is the problem a priority?        | <ul style="list-style-type: none"> <li>○ No</li> <li>○ Probably no</li> <li>○ Uncertain</li> <li>● <b>Probably yes</b></li> <li>○ Yes</li> <li>○ Varies</li> </ul>                                           | <ul style="list-style-type: none"> <li>● Drop attacks in older subjects are associated with high levels of morbidity and healthcare resource utilization. Attributable diagnoses are achievable in the majority of cases with a systematic investigative approach. The high diagnostic yield more than justifies the approach described (Perry S.W. 2004).</li> <li>● Amnesia for loss of consciousness (A-LOC) is common in Vasovagal syncope. Although more prevalent, it is not unique to older age-groups. Absence of syncope associated bradycardia during head-up tilt testing predicts for A-LOC (O'Dwyer, C. 2010).</li> <li>● Patients with carotid sinus syndrome have similar rates of witnessed loss of consciousness during laboratory testing regardless of symptoms. However, those presenting with falls are far less likely to perceive any disturbance of consciousness than those with syncope, showing for the first time the manner in which such patients manifest symptoms. Cognitive impairment does not explain the amnesia for loss of consciousness seen in fallers with carotid sinus syndrome (Perry S.W. 2005).</li> </ul> |                                         |
|                                |                                   |                                                                                                                                                                                                              |                                                                                                                                                                                                                                                                                                                                                                                                                                                                                                                                                                                                                                                                                                                                                                                                                                                                                                                                                                                                                                                                                                                                                          |                                         |



|                                          |                                                                                                                                        |                                                                                                                                                                                                                                                                                                         |                                                              |                            |                                          |       |
|------------------------------------------|----------------------------------------------------------------------------------------------------------------------------------------|---------------------------------------------------------------------------------------------------------------------------------------------------------------------------------------------------------------------------------------------------------------------------------------------------------|--------------------------------------------------------------|----------------------------|------------------------------------------|-------|
| <b>Benefits and harms</b><br>(see below) | Is there Important uncertainty or variability in how much patients, researchers, clinicians and stake holders value the main outcomes? | <ul style="list-style-type: none"> <li>○ Important uncertainty or variability</li> <li>○ Possibly important uncertainty or variability</li> <li>● <b>Probably no important uncertainty of variability</b></li> <li>○ No important uncertainty of variability</li> <li>○ No known undesirable</li> </ul> | <i>Relative importance of the main outcomes of interest:</i> |                            |                                          | None. |
|                                          |                                                                                                                                        |                                                                                                                                                                                                                                                                                                         | <b>Outcome</b>                                               | <b>Relative Importance</b> | <b>Certainty of the evidence (GRADE)</b> |       |
|                                          |                                                                                                                                        |                                                                                                                                                                                                                                                                                                         | Falls                                                        | Critical                   | ⊕⊕○○<br>LOW                              |       |
|                                          |                                                                                                                                        |                                                                                                                                                                                                                                                                                                         | Loss of consciousness due to changes in body posture         | Critical                   | ⊕⊕○○<br>LOW                              |       |
|                                          |                                                                                                                                        |                                                                                                                                                                                                                                                                                                         |                                                              |                            | ○○○○<br>MODERATE                         |       |
|                                          | What is the overall certainty of this evidence?                                                                                        | <ul style="list-style-type: none"> <li>○ No studies</li> <li>○ Very low</li> <li>○ Low</li> <li>● <b>Moderate</b></li> <li>○ High</li> </ul>                                                                                                                                                            |                                                              |                            | ○○○○<br>MODERATE                         |       |
|                                          |                                                                                                                                        |                                                                                                                                                                                                                                                                                                         |                                                              |                            | ○○○○<br>MODERATE                         |       |
|                                          |                                                                                                                                        |                                                                                                                                                                                                                                                                                                         |                                                              |                            | ○○○○<br>MODERATE                         |       |
|                                          |                                                                                                                                        |                                                                                                                                                                                                                                                                                                         |                                                              |                            | ○○○○<br>MODERATE                         |       |
|                                          |                                                                                                                                        |                                                                                                                                                                                                                                                                                                         |                                                              |                            | ○○○○<br>MODERATE                         |       |

|                                                                                                                                                                                                                                                                                                                                                                          |                                               |                                                                                                         |
|--------------------------------------------------------------------------------------------------------------------------------------------------------------------------------------------------------------------------------------------------------------------------------------------------------------------------------------------------------------------------|-----------------------------------------------|---------------------------------------------------------------------------------------------------------|
| <input type="checkbox"/> How substantial are the desirable anticipated effects of the intervention? Large <ul style="list-style-type: none"> <li><input type="radio"/> Moderate</li> <li><input type="radio"/> Small</li> <li><input checked="" type="radio"/> <b>Trivial</b></li> <li><input type="radio"/> Varies</li> <li><input type="radio"/> Don't know</li> </ul> | <p><i>Summary of findings (GRADE): 1A</i></p> | <p>As the intervention is an assessment, there is very little to no benefit or harm to the patient.</p> |
|--------------------------------------------------------------------------------------------------------------------------------------------------------------------------------------------------------------------------------------------------------------------------------------------------------------------------------------------------------------------------|-----------------------------------------------|---------------------------------------------------------------------------------------------------------|

|                                                                                                         |                                                                                                                                                                                                                                                                                                                                                                                          | Outcome                         | N <sup>o</sup> of patients                                                          |         | Effect                                                            |  |
|---------------------------------------------------------------------------------------------------------|------------------------------------------------------------------------------------------------------------------------------------------------------------------------------------------------------------------------------------------------------------------------------------------------------------------------------------------------------------------------------------------|---------------------------------|-------------------------------------------------------------------------------------|---------|-------------------------------------------------------------------|--|
|                                                                                                         |                                                                                                                                                                                                                                                                                                                                                                                          |                                 | Intervention                                                                        | Control | Relative / Absolute (95% CI)                                      |  |
| How substantial are the undesirable anticipated effects of the intervention?                            | <ul style="list-style-type: none"> <li><input checked="" type="radio"/> <b>Trivial</b></li> <li><input type="radio"/> Small</li> <li><input type="radio"/> Moderate</li> <li><input type="radio"/> Large</li> <li><input type="radio"/> Varies</li> <li><input type="radio"/> Don't know</li> </ul>                                                                                      | Unexplained falls <sup>94</sup> | 1500 participants. Intervention and control N/A (observational study: cohort study) |         | OH(40) RR=1.6 (1.1-2.1) p<0.01. Sustained OH 1.6 (1.1,2.5) p<0.05 |  |
|                                                                                                         |                                                                                                                                                                                                                                                                                                                                                                                          | Unexplained falls <sup>95</sup> | 4127 participants. Intervention and control N/A (observational study: cohort study) |         | OH(40) RR=1.5 (1.0-2.3), p=0.04. OH RR: 1.8 (1.1-3.1) p<0.05      |  |
|                                                                                                         |                                                                                                                                                                                                                                                                                                                                                                                          | Unexplained falls <sup>42</sup> | 523 participants. Intervention and control N/A (observational study: cohort study)  |         | OR=2.3 (1.1-4.9), p<0.05                                          |  |
| Does the balance between desirable effects and undesirable effects favour the option of the comparison? | <ul style="list-style-type: none"> <li><input type="radio"/> Favours the option</li> <li><input type="radio"/> Probably favours the option</li> <li><input checked="" type="radio"/> <b>Does not favour either</b></li> <li><input type="radio"/> Probably favours the comparison</li> <li><input type="radio"/> Favours the comparison</li> <li><input type="radio"/> Varies</li> </ul> |                                 |                                                                                     |         |                                                                   |  |

|                                                                                                    |                                                                                                                                                                                        |                                                                                                                                                                                                                                                                                                                                                                                                                                    |                                                                                                                                                  |  |
|----------------------------------------------------------------------------------------------------|----------------------------------------------------------------------------------------------------------------------------------------------------------------------------------------|------------------------------------------------------------------------------------------------------------------------------------------------------------------------------------------------------------------------------------------------------------------------------------------------------------------------------------------------------------------------------------------------------------------------------------|--------------------------------------------------------------------------------------------------------------------------------------------------|--|
| <p style="writing-mode: vertical-rl; transform: rotate(180deg);"><b>Values and preferences</b></p> | <p>Is there similarity about how much patients, researchers, clinicians and stake holders value the main Outcomes?<br/>Also include adverse effects and burden of the intervention</p> | <ul style="list-style-type: none"> <li><input type="radio"/> No</li> <li><input type="radio"/> Probably no</li> <li><input type="radio"/> Uncertain</li> <li><input checked="" type="radio"/> <b>Probably yes</b></li> <li><input type="radio"/> Yes</li> <li><input type="radio"/> Varies</li> </ul>                                                                                                                              | <p>When a fall related to a syncope occurs patients can suffer fall related injuries, which can increase risk of hospitalizations and death.</p> |  |
| <p style="writing-mode: vertical-rl; transform: rotate(180deg);"><b>Resources</b></p>              | <p>What is the certainty of the evidence of resources requirements (costs)?</p>                                                                                                        | <ul style="list-style-type: none"> <li><input checked="" type="radio"/> <b>No studies</b></li> <li><input type="radio"/> Very low</li> <li><input type="radio"/> Low</li> <li><input type="radio"/> Moderate</li> <li><input type="radio"/> High</li> </ul>                                                                                                                                                                        |                                                                                                                                                  |  |
|                                                                                                    | <p>Does the cost effectiveness favour the intervention or the comparison?</p>                                                                                                          | <ul style="list-style-type: none"> <li><input type="radio"/> Favours the option</li> <li><input type="radio"/> Probably favours the option</li> <li><input type="radio"/> Does not favour either</li> <li><input type="radio"/> Probably favours the comparison</li> <li><input type="radio"/> Favours the comparison</li> <li><input type="radio"/> Varies</li> <li><input checked="" type="radio"/> <b>No studies</b></li> </ul> |                                                                                                                                                  |  |

|               |                                               |                                                                                                                                                                                                                                                                                                                             |                                                                        |  |
|---------------|-----------------------------------------------|-----------------------------------------------------------------------------------------------------------------------------------------------------------------------------------------------------------------------------------------------------------------------------------------------------------------------------|------------------------------------------------------------------------|--|
| Equity        | What would be the impact on health equity?    | <ul style="list-style-type: none"> <li><input type="radio"/> Increased</li> <li><input type="radio"/> Probably increased</li> <li><input checked="" type="radio"/> <b>Uncertain</b></li> <li><input type="radio"/> Probably reduced</li> <li><input type="radio"/> Reduced</li> <li><input type="radio"/> Varies</li> </ul> | No studies outlining the effects of the intervention on health equity. |  |
| Acceptability | Is the option acceptable to key stakeholders? | <ul style="list-style-type: none"> <li><input type="radio"/> No</li> <li><input type="radio"/> Probably no</li> <li><input type="radio"/> Uncertain</li> <li><input checked="" type="radio"/> <b>Probably yes</b></li> <li><input type="radio"/> Yes</li> <li><input type="radio"/> Varies</li> </ul>                       | No studies.                                                            |  |

|             |                                            |                                                                                                                                                                                                                                                                                                       |  |  |
|-------------|--------------------------------------------|-------------------------------------------------------------------------------------------------------------------------------------------------------------------------------------------------------------------------------------------------------------------------------------------------------|--|--|
| Feasibility | Is the intervention feasible to implement? | <ul style="list-style-type: none"> <li><input type="radio"/> No</li> <li><input type="radio"/> Probably no</li> <li><input type="radio"/> Uncertain</li> <li><input type="radio"/> Probably yes</li> <li><input checked="" type="radio"/> <b>Yes</b></li> <li><input type="radio"/> Varies</li> </ul> |  |  |
|-------------|--------------------------------------------|-------------------------------------------------------------------------------------------------------------------------------------------------------------------------------------------------------------------------------------------------------------------------------------------------------|--|--|

**Should the assessment of unexplained falls should be the same as that for unexplained syncope. be recommended for older adults to prevent and manage falls?**

| Type of recommendation        | Strong recommendation against the intervention<br><input type="radio"/>                                                                                                                                                 | Weak recommendation against the intervention<br><input type="radio"/> | Conditional recommendation for either the intervention or the comparison<br><input type="radio"/> | Weak recommendation for the intervention<br><input type="radio"/> | Strong recommendation for the intervention<br><input checked="" type="radio"/> |
|-------------------------------|-------------------------------------------------------------------------------------------------------------------------------------------------------------------------------------------------------------------------|-----------------------------------------------------------------------|---------------------------------------------------------------------------------------------------|-------------------------------------------------------------------|--------------------------------------------------------------------------------|
| Recommendation                | Recommendation 3 (assessment): We recommend that the further cardiovascular assessment for unexplained falls should be the same as that for syncope, in addition to the multifactorial falls risk assessment. GRADE: 1A |                                                                       |                                                                                                   |                                                                   |                                                                                |
| Justification                 | Assessment of syncope transient loss of consciousness important to set up target interventions in the case of unexplained falls.                                                                                        |                                                                       |                                                                                                   |                                                                   |                                                                                |
| Subgroup considerations       | None.                                                                                                                                                                                                                   |                                                                       |                                                                                                   |                                                                   |                                                                                |
| Implementation considerations | Clinicians should insure that the assessment of unexplained falls be treated in the same manner as that of unexplained syncope.                                                                                         |                                                                       |                                                                                                   |                                                                   |                                                                                |
| Monitoring and evaluation     | Cardiovascular assessments.                                                                                                                                                                                             |                                                                       |                                                                                                   |                                                                   |                                                                                |
| Research Priorities           | Determination of associated costs with the implementation of these assessments, the impact on health equity, a meta-analysis showing the risk ratio and benefit of conducting these assessments.                        |                                                                       |                                                                                                   |                                                                   |                                                                                |



## Recommendations for Working Group 3: Cardiovascular Risk Factors for Falls

### Recommendation 4 (Intervention): We recommend that management of orthostatic hypotension should be included as a component of multidomain intervention in fallers. GRADE: 1A

| <b>Population:</b>      | Older adults aged $\geq 60$ years     | <b>Objective:</b> To include management strategies for orthostatic hypotension as a component of multidomainl intervention to reduce falls in older adults.        |                                                                                                                                                                                                                                                                                                                                                                                                                                                                                                         |                                         |
|-------------------------|---------------------------------------|--------------------------------------------------------------------------------------------------------------------------------------------------------------------|---------------------------------------------------------------------------------------------------------------------------------------------------------------------------------------------------------------------------------------------------------------------------------------------------------------------------------------------------------------------------------------------------------------------------------------------------------------------------------------------------------|-----------------------------------------|
| <b>Intervention:</b>    | Management of orthostatic hypotension |                                                                                                                                                                    |                                                                                                                                                                                                                                                                                                                                                                                                                                                                                                         |                                         |
| <b>Comparison:</b>      | Lack thereof                          |                                                                                                                                                                    |                                                                                                                                                                                                                                                                                                                                                                                                                                                                                                         |                                         |
| <b>Main outcomes:</b>   | Falls                                 |                                                                                                                                                                    |                                                                                                                                                                                                                                                                                                                                                                                                                                                                                                         |                                         |
| <b>Setting:</b>         | Community dwelling older adults       |                                                                                                                                                                    |                                                                                                                                                                                                                                                                                                                                                                                                                                                                                                         |                                         |
| <b>Perspective:</b>     | Population                            |                                                                                                                                                                    |                                                                                                                                                                                                                                                                                                                                                                                                                                                                                                         |                                         |
| Decision Domain         |                                       | Judgements                                                                                                                                                         | Research Evidence                                                                                                                                                                                                                                                                                                                                                                                                                                                                                       | Additional Considerations /Explanations |
| Priority of the Problem | Is the problem a priority?            | <ul style="list-style-type: none"> <li>○ No</li> <li>○ Probably no</li> <li>○ Uncertain</li> <li>○ Probably yes</li> <li>● <b>Yes</b></li> <li>○ Varies</li> </ul> | Many multifactorial fall prevention programs that have shown benefit for fall prevention <sup>125,126,127,128</sup> have included medication reduction and simplification to modify orthostatic blood pressure. Other strategies to address OH include hydration, elastic stockings, abdominal binders, and medications used to treat orthostatic hypotension (e.g., fludrocortisone and midodrine).However, no studies have focused on the benefits of these interventions alone for falls prevention. |                                         |
|                         |                                       |                                                                                                                                                                    |                                                                                                                                                                                                                                                                                                                                                                                                                                                                                                         |                                         |

|                                                 |                                                                                                                                              |                                                                                                                                                                                                                                                                                                         |                                                              |                            |                                          |       |
|-------------------------------------------------|----------------------------------------------------------------------------------------------------------------------------------------------|---------------------------------------------------------------------------------------------------------------------------------------------------------------------------------------------------------------------------------------------------------------------------------------------------------|--------------------------------------------------------------|----------------------------|------------------------------------------|-------|
| <b>Benefits and harms</b><br>(see below)        | Is there important uncertainty or variability in how much patients, researchers, clinicians and stake holders value the main outcomes?       | <ul style="list-style-type: none"> <li>○ Important uncertainty or variability</li> <li>○ Possibly important uncertainty or variability</li> <li>● <b>Probably no important uncertainty of variability</b></li> <li>○ No important uncertainty of variability</li> <li>○ No known undesirable</li> </ul> | <b>Relative importance of the main outcomes of interest:</b> |                            |                                          | None. |
|                                                 |                                                                                                                                              |                                                                                                                                                                                                                                                                                                         | <b>Outcome</b>                                               | <b>Relative Importance</b> | <b>Certainty of the evidence (GRADE)</b> |       |
|                                                 |                                                                                                                                              |                                                                                                                                                                                                                                                                                                         | Falls                                                        | Critical                   | ⊕⊕⊕○<br>MODERATE                         |       |
|                                                 |                                                                                                                                              |                                                                                                                                                                                                                                                                                                         |                                                              |                            | ○○○○<br>MODERATE                         |       |
|                                                 |                                                                                                                                              |                                                                                                                                                                                                                                                                                                         |                                                              |                            | ○○○○<br>MODERATE                         |       |
|                                                 |                                                                                                                                              |                                                                                                                                                                                                                                                                                                         |                                                              |                            | ○○○○<br>MODERATE                         |       |
|                                                 |                                                                                                                                              |                                                                                                                                                                                                                                                                                                         |                                                              |                            | ○○○○<br>MODERATE                         |       |
|                                                 |                                                                                                                                              |                                                                                                                                                                                                                                                                                                         |                                                              |                            | ○○○○<br>MODERATE                         |       |
|                                                 |                                                                                                                                              |                                                                                                                                                                                                                                                                                                         |                                                              |                            | ○○○○<br>MODERATE                         |       |
|                                                 |                                                                                                                                              |                                                                                                                                                                                                                                                                                                         |                                                              |                            | ○○○○<br>MODERATE                         |       |
| What is the overall certainty of this evidence? | <ul style="list-style-type: none"> <li>○ No studies</li> <li>○ Very low</li> <li>○ Low</li> <li>● <b>Moderate</b></li> <li>○ High</li> </ul> |                                                                                                                                                                                                                                                                                                         |                                                              |                            |                                          |       |

|                                                                                                                                                                                                                                                           |                                               |                                                           |
|-----------------------------------------------------------------------------------------------------------------------------------------------------------------------------------------------------------------------------------------------------------|-----------------------------------------------|-----------------------------------------------------------|
| <input type="checkbox"/> How substantial are the desirable anticipated effects of the intervention? Large <ul style="list-style-type: none"> <li>• <b>Moderate</b></li> <li>○ Small</li> <li>○ Trivial</li> <li>○ Varies</li> <li>○ Don't know</li> </ul> | <p><i>Summary of findings (GRADE): 1A</i></p> | RR: rate ratio<br>* Falls per person-week<br>** Any falls |
|-----------------------------------------------------------------------------------------------------------------------------------------------------------------------------------------------------------------------------------------------------------|-----------------------------------------------|-----------------------------------------------------------|

|                                                                                                         |                                                                                                                                                                                                                                                       | Outcome                                | N <sup>o</sup> of patients |         | Effect                        |
|---------------------------------------------------------------------------------------------------------|-------------------------------------------------------------------------------------------------------------------------------------------------------------------------------------------------------------------------------------------------------|----------------------------------------|----------------------------|---------|-------------------------------|
|                                                                                                         |                                                                                                                                                                                                                                                       |                                        | Intervention               | Control | Relative / Absolute (95% CI)  |
| How substantial are the undesirable anticipated effects of the intervention?                            | <ul style="list-style-type: none"> <li>○ Trivial</li> <li>• <b>Small</b></li> <li>○ Moderate</li> <li>○ Large</li> <li>○ Varies</li> <li>○ Don't know</li> </ul>                                                                                      | Fall rate <sup>125</sup>               | 147                        | 144     | IRR: 0.69<br>(0.52 – 0.90) *  |
|                                                                                                         |                                                                                                                                                                                                                                                       | Risk of falling <sup>126</sup>         | 184                        | 213     | IRR: 0.76<br>(0.58 – 0.98) ** |
|                                                                                                         |                                                                                                                                                                                                                                                       | Risk of recurrent falls <sup>126</sup> | 184                        | 213     | OR: 0.39<br>(0.23 – 0.66)     |
| Does the balance between desirable effects and undesirable effects favour the option of the comparison? | <ul style="list-style-type: none"> <li>○ Favours the option</li> <li>• <b>Probably favours the option</b></li> <li>○ Does not favour either</li> <li>○ Probably favours the comparison</li> <li>○ Favours the comparison</li> <li>○ Varies</li> </ul> |                                        |                            |         |                               |

|                                                                                                    |                                                                                                                                                                                    |                                                                                                                                                                                                                                                                                                                                                                                          |                                                                                                                                                               |  |
|----------------------------------------------------------------------------------------------------|------------------------------------------------------------------------------------------------------------------------------------------------------------------------------------|------------------------------------------------------------------------------------------------------------------------------------------------------------------------------------------------------------------------------------------------------------------------------------------------------------------------------------------------------------------------------------------|---------------------------------------------------------------------------------------------------------------------------------------------------------------|--|
| <p style="writing-mode: vertical-rl; transform: rotate(180deg);"><b>Values and preferences</b></p> | <p>Is there similarity about how much patients, researchers, clinicians and stake holders value the main Outcomes? Also include adverse effects and burden of the intervention</p> | <ul style="list-style-type: none"> <li><input type="radio"/> No</li> <li><input type="radio"/> Probably no</li> <li><input type="radio"/> Uncertain</li> <li><input checked="" type="radio"/> <b>Probably yes</b></li> <li><input type="radio"/> Yes</li> <li><input type="radio"/> Varies</li> </ul>                                                                                    |                                                                                                                                                               |  |
| <p style="writing-mode: vertical-rl; transform: rotate(180deg);"><b>Resources</b></p>              | <p>What is the certainty of the evidence of resources requirements (costs)?</p>                                                                                                    | <ul style="list-style-type: none"> <li><input type="radio"/> No studies</li> <li><input type="radio"/> Very low</li> <li><input type="radio"/> Low</li> <li><input checked="" type="radio"/> <b>Moderate</b></li> <li><input type="radio"/> High</li> </ul>                                                                                                                              | <p>The associated cost of the intervention per fall prevented was \$12,392 compared favorably to the mean hospitalization cost of \$11,800<sup>125</sup>.</p> |  |
|                                                                                                    | <p>Does the cost effectiveness favour the intervention or the comparison?</p>                                                                                                      | <ul style="list-style-type: none"> <li><input type="radio"/> Favours the option</li> <li><input checked="" type="radio"/> <b>Probably favours the option</b></li> <li><input type="radio"/> Does not favour either</li> <li><input type="radio"/> Probably favours the comparison</li> <li><input type="radio"/> Favours the comparison</li> <li><input type="radio"/> Varies</li> </ul> | <p>A complete analysis of total and fall-related health care costs may show the intervention to result in a net cost savings<sup>125</sup>.</p>               |  |

|               |                                               |                                                                                                                                                                                                                                                                                                                             |                                       |  |
|---------------|-----------------------------------------------|-----------------------------------------------------------------------------------------------------------------------------------------------------------------------------------------------------------------------------------------------------------------------------------------------------------------------------|---------------------------------------|--|
| Equity        | What would be the impact on health equity?    | <ul style="list-style-type: none"> <li><input type="radio"/> Increased</li> <li><input type="radio"/> Probably increased</li> <li><input checked="" type="radio"/> <b>Uncertain</b></li> <li><input type="radio"/> Probably reduced</li> <li><input type="radio"/> Reduced</li> <li><input type="radio"/> Varies</li> </ul> | Studies do not mention health equity. |  |
| Acceptability | Is the option acceptable to key stakeholders? | <ul style="list-style-type: none"> <li><input type="radio"/> No</li> <li><input type="radio"/> Probably no</li> <li><input type="radio"/> Uncertain</li> <li><input checked="" type="radio"/> <b>Probably yes</b></li> <li><input type="radio"/> Yes</li> <li><input type="radio"/> Varies</li> </ul>                       |                                       |  |

|             |                                            |                                                                                                                                                                                                                                                                                                       |  |  |
|-------------|--------------------------------------------|-------------------------------------------------------------------------------------------------------------------------------------------------------------------------------------------------------------------------------------------------------------------------------------------------------|--|--|
| Feasibility | Is the intervention feasible to implement? | <ul style="list-style-type: none"> <li><input type="radio"/> No</li> <li><input type="radio"/> Probably no</li> <li><input type="radio"/> Uncertain</li> <li><input checked="" type="radio"/> <b>Probably yes</b></li> <li><input type="radio"/> Yes</li> <li><input type="radio"/> Varies</li> </ul> |  |  |
|-------------|--------------------------------------------|-------------------------------------------------------------------------------------------------------------------------------------------------------------------------------------------------------------------------------------------------------------------------------------------------------|--|--|

**Should management of orthostatic hypotension should be included as a component of multidomain intervention in older fallers be recommended for older adults to prevent and manage falls?**

| Type of recommendation        | Strong recommendation against the intervention<br><input type="radio"/>                                                                                                              | Weak recommendation against the intervention<br><input type="radio"/> | Conditional recommendation for either the intervention or the comparison<br><input type="radio"/> | Weak recommendation for the intervention<br><input type="radio"/> | Strong recommendation for the intervention<br><input checked="" type="radio"/> |
|-------------------------------|--------------------------------------------------------------------------------------------------------------------------------------------------------------------------------------|-----------------------------------------------------------------------|---------------------------------------------------------------------------------------------------|-------------------------------------------------------------------|--------------------------------------------------------------------------------|
| Recommendation                | Recommendation 4 (Intervention): We recommend that management of orthostatic hypotension should be included as a component of multidomain intervention in fallers. GRADE: 1A         |                                                                       |                                                                                                   |                                                                   |                                                                                |
| Justification                 | Many multidomain fall prevention programs that have shown benefit for fall prevention have included medication reduction and simplification to modify orthostatic blood pressure.    |                                                                       |                                                                                                   |                                                                   |                                                                                |
| Subgroup considerations       | Other strategies to address OH include hydration, elastic stockings, abdominal binders, and medications used to treat orthostatic hypotension (e.g., fludrocortisone and midodrine). |                                                                       |                                                                                                   |                                                                   |                                                                                |
| Implementation considerations | Distribution of intake of possibly culprit medications throughout the day, rather than in a single dose, may reduce medication related falls                                         |                                                                       |                                                                                                   |                                                                   |                                                                                |
| Monitoring and evaluation     |                                                                                                                                                                                      |                                                                       |                                                                                                   |                                                                   |                                                                                |
| Research Priorities           | Additional studies looking at the benefits of these interventions alone for fall prevention. Meta-analysis performed on to determine significance of the intervention.               |                                                                       |                                                                                                   |                                                                   |                                                                                |

## Recommendations for Working Group 3: Cardiovascular Risk Factors for Falls

**Recommendation 5: We recommend that interventions for cardiovascular disorders identified during assessment for risk of falls should be the same as that for similar conditions when associated with syncope, in the addition to other interventions based on the multifactorial falls risk assessment.**

**GRADE: 1B**

| <i>Population:</i>             |                            | <i>Objective: The main goal of these recommendations is to assist health care professionals in the cardiovascular assessment and management of older patients who have fallen or are at risk of falling. Note: Because of dependence of the assessment on subsequent intervention for effectiveness, it was more difficult to ascribe strength of recommendation to assessment recommendations alone. Likewise, prior to any intervention, assessment of an individual's risks and deficits is required to determine specific needs and, if necessary, to deliver targeted interventions. We present the recommendations for assessment and for intervention separately.</i> |                                                                                                                                                                                                                                                                                                                                                                                                                                                                                                                                                                                                                                                                                                                                                                                                                                                                                                                                                                                                                                                                                                                                                                                                                                                                               |                                                                                                                                                                                                                                                                                                                                                                                                                                                                                                                                                                                                                                                                                                                                                                                            |
|--------------------------------|----------------------------|------------------------------------------------------------------------------------------------------------------------------------------------------------------------------------------------------------------------------------------------------------------------------------------------------------------------------------------------------------------------------------------------------------------------------------------------------------------------------------------------------------------------------------------------------------------------------------------------------------------------------------------------------------------------------|-------------------------------------------------------------------------------------------------------------------------------------------------------------------------------------------------------------------------------------------------------------------------------------------------------------------------------------------------------------------------------------------------------------------------------------------------------------------------------------------------------------------------------------------------------------------------------------------------------------------------------------------------------------------------------------------------------------------------------------------------------------------------------------------------------------------------------------------------------------------------------------------------------------------------------------------------------------------------------------------------------------------------------------------------------------------------------------------------------------------------------------------------------------------------------------------------------------------------------------------------------------------------------|--------------------------------------------------------------------------------------------------------------------------------------------------------------------------------------------------------------------------------------------------------------------------------------------------------------------------------------------------------------------------------------------------------------------------------------------------------------------------------------------------------------------------------------------------------------------------------------------------------------------------------------------------------------------------------------------------------------------------------------------------------------------------------------------|
| <i>Intervention:</i>           |                            |                                                                                                                                                                                                                                                                                                                                                                                                                                                                                                                                                                                                                                                                              |                                                                                                                                                                                                                                                                                                                                                                                                                                                                                                                                                                                                                                                                                                                                                                                                                                                                                                                                                                                                                                                                                                                                                                                                                                                                               |                                                                                                                                                                                                                                                                                                                                                                                                                                                                                                                                                                                                                                                                                                                                                                                            |
| <i>Comparison:</i>             |                            |                                                                                                                                                                                                                                                                                                                                                                                                                                                                                                                                                                                                                                                                              |                                                                                                                                                                                                                                                                                                                                                                                                                                                                                                                                                                                                                                                                                                                                                                                                                                                                                                                                                                                                                                                                                                                                                                                                                                                                               |                                                                                                                                                                                                                                                                                                                                                                                                                                                                                                                                                                                                                                                                                                                                                                                            |
| <i>Main outcomes:</i>          |                            |                                                                                                                                                                                                                                                                                                                                                                                                                                                                                                                                                                                                                                                                              |                                                                                                                                                                                                                                                                                                                                                                                                                                                                                                                                                                                                                                                                                                                                                                                                                                                                                                                                                                                                                                                                                                                                                                                                                                                                               |                                                                                                                                                                                                                                                                                                                                                                                                                                                                                                                                                                                                                                                                                                                                                                                            |
| <i>Setting:</i>                |                            |                                                                                                                                                                                                                                                                                                                                                                                                                                                                                                                                                                                                                                                                              |                                                                                                                                                                                                                                                                                                                                                                                                                                                                                                                                                                                                                                                                                                                                                                                                                                                                                                                                                                                                                                                                                                                                                                                                                                                                               |                                                                                                                                                                                                                                                                                                                                                                                                                                                                                                                                                                                                                                                                                                                                                                                            |
| <i>Perspective:</i>            |                            |                                                                                                                                                                                                                                                                                                                                                                                                                                                                                                                                                                                                                                                                              |                                                                                                                                                                                                                                                                                                                                                                                                                                                                                                                                                                                                                                                                                                                                                                                                                                                                                                                                                                                                                                                                                                                                                                                                                                                                               |                                                                                                                                                                                                                                                                                                                                                                                                                                                                                                                                                                                                                                                                                                                                                                                            |
| Decision Domain                |                            | Judgements                                                                                                                                                                                                                                                                                                                                                                                                                                                                                                                                                                                                                                                                   | Research Evidence                                                                                                                                                                                                                                                                                                                                                                                                                                                                                                                                                                                                                                                                                                                                                                                                                                                                                                                                                                                                                                                                                                                                                                                                                                                             | Additional Considerations /Explanations                                                                                                                                                                                                                                                                                                                                                                                                                                                                                                                                                                                                                                                                                                                                                    |
| <b>Priority of the Problem</b> | Is the problem a priority? | <ul style="list-style-type: none"> <li>○ No</li> <li>○ Probably no</li> <li>○ Uncertain</li> <li>○ Probably yes</li> <li>● <b>Yes</b></li> <li>○ Varies</li> </ul>                                                                                                                                                                                                                                                                                                                                                                                                                                                                                                           | <ol style="list-style-type: none"> <li>1. There is a significant overlap between unexplained falls and syncope [3]. If unwitnessed falls are not due to slips or trips (i.e. are unexplained), it is possible that the patient experienced a syncopal event and displayed lack of awareness for LOC [4, 5]. Management of falls in such circumstances is the same as that for syncope [43, 129, 130].</li> <li>2. Our recommendation aligns with the 2018 European Society of Cardiology Taskforce for Syncope Guidelines state that 'Despite the lack of controlled trials and an overall modest quality of studies, there is strong consensus that the management of unexplained falls should be the same as that for unexplained syncope' [1].</li> <li>3. Interventions for bradycardic disorders (sinus node disease, atrioventricular conduction disorders, vasovagal syndrome and carotid sinus syndrome) and tachyarrhythmias (atrial fibrillation, supraventricular and ventricular tachycardia) include modification of culprit medications and, in some cases, implantable devices (such as pacemakers and ICDs) and are as per Syncope guidelines (i.e. European Cardiac Society Task force on Syncope). Cardiac pacing treats bradycardia. One RCT of</li> </ol> | <p><b>BACKGROUND</b></p> <p>The most common cardiovascular disorders associated with falls are orthostatic hypotension, bradyarrhythmia (e.g., sick sinus syndrome and atrioventricular block), tachyarrhythmias (such as atrial tachycardia including atrial fibrillation and ventricular tachycardia), carotid sinus hypersensitivity and vasovagal syndrome. Three mechanisms have been proposed. The first is transient loss of consciousness with amnesia in which the patient has no recollection of short episodes of syncope; this has been reported with orthostatic hypotension and carotid sinus hypersensitivity [64]. Given that many falls in older persons are not witnessed, these patients may present with a report of a fall rather than syncope. A second proposed</p> |

|  |  |  |                                                                                                                                                                                                                                                                                                                                                                                                                                                                                                |                                                                                                                                                                                                                                                                                                                                                                                                                                            |
|--|--|--|------------------------------------------------------------------------------------------------------------------------------------------------------------------------------------------------------------------------------------------------------------------------------------------------------------------------------------------------------------------------------------------------------------------------------------------------------------------------------------------------|--------------------------------------------------------------------------------------------------------------------------------------------------------------------------------------------------------------------------------------------------------------------------------------------------------------------------------------------------------------------------------------------------------------------------------------------|
|  |  |  | <p>cardiac pacing in community-dwelling older people who had recurrent unexplained falls, reported a significant reduction in fall rates at 12-month follow-up [131]. For the subset of older adults who meet the necessary diagnostic criteria, dual-chamber cardiac pacing for bradyarrhythmias (including carotid sinus hypersensitivity and conduction disorders) and treatment of tachyarrhythmia are components of a multidomain intervention designed to reduce the risk for falls.</p> | <p>mechanism is that of transient hypotensive episodes, due to primary hypotension or hypotension secondary to arrhythmias, which cause a person with comorbid gait and balance instability to lose balance and fall without frank syncope. Finally, falls and cardiovascular disorders may share pathophysiological substrates, such as vascular damage to neural pathways governing gait and balance, thereby predisposing to falls.</p> |
|--|--|--|------------------------------------------------------------------------------------------------------------------------------------------------------------------------------------------------------------------------------------------------------------------------------------------------------------------------------------------------------------------------------------------------------------------------------------------------------------------------------------------------|--------------------------------------------------------------------------------------------------------------------------------------------------------------------------------------------------------------------------------------------------------------------------------------------------------------------------------------------------------------------------------------------------------------------------------------------|



|                                                 |                                                                                                                                        |                                                                                                                                                                                                                                                                                                  |                                                                     |                            |                                          |       |
|-------------------------------------------------|----------------------------------------------------------------------------------------------------------------------------------------|--------------------------------------------------------------------------------------------------------------------------------------------------------------------------------------------------------------------------------------------------------------------------------------------------|---------------------------------------------------------------------|----------------------------|------------------------------------------|-------|
| <b>Benefits and harms</b><br>(see below)        | Is there important uncertainty or variability in how much patients, researchers, clinicians and stake holders value the main outcomes? | <ul style="list-style-type: none"> <li>○ Important uncertainty or variability</li> <li>○ Possibly important uncertainty or variability</li> <li>○ Probably no important uncertainty of variability</li> <li>○ No important uncertainty of variability</li> <li>○ No known undesirable</li> </ul> | <b><i>Relative importance of the main outcomes of interest:</i></b> |                            |                                          | None. |
|                                                 |                                                                                                                                        |                                                                                                                                                                                                                                                                                                  | <b>Outcome</b>                                                      | <b>Relative Importance</b> | <b>Certainty of the evidence (GRADE)</b> |       |
|                                                 |                                                                                                                                        |                                                                                                                                                                                                                                                                                                  |                                                                     |                            | ○○○○<br>MODERATE                         |       |
|                                                 |                                                                                                                                        |                                                                                                                                                                                                                                                                                                  |                                                                     |                            | ○○○○<br>MODERATE                         |       |
|                                                 |                                                                                                                                        |                                                                                                                                                                                                                                                                                                  |                                                                     |                            | ○○○○<br>MODERATE                         |       |
|                                                 |                                                                                                                                        |                                                                                                                                                                                                                                                                                                  |                                                                     |                            | ○○○○<br>MODERATE                         |       |
|                                                 |                                                                                                                                        |                                                                                                                                                                                                                                                                                                  |                                                                     |                            | ○○○○<br>MODERATE                         |       |
|                                                 |                                                                                                                                        |                                                                                                                                                                                                                                                                                                  |                                                                     |                            | ○○○○<br>MODERATE                         |       |
|                                                 |                                                                                                                                        |                                                                                                                                                                                                                                                                                                  |                                                                     |                            | ○○○○<br>MODERATE                         |       |
|                                                 |                                                                                                                                        |                                                                                                                                                                                                                                                                                                  |                                                                     |                            | ○○○○<br>MODERATE                         |       |
| What is the overall certainty of this evidence? | <ul style="list-style-type: none"> <li>○ No studies</li> <li>○ Very low</li> <li>○ Low</li> <li>○ Moderate</li> <li>○ High</li> </ul>  |                                                                                                                                                                                                                                                                                                  |                                                                     |                            |                                          |       |

|                                                                                                                                                                                                                                                    |                                                                                                                                                                                                                                                |                |                       |                |                                     |                                                                             |
|----------------------------------------------------------------------------------------------------------------------------------------------------------------------------------------------------------------------------------------------------|------------------------------------------------------------------------------------------------------------------------------------------------------------------------------------------------------------------------------------------------|----------------|-----------------------|----------------|-------------------------------------|-----------------------------------------------------------------------------|
| <input type="checkbox"/> How substantial are the desirable anticipated effects of the intervention? Large <ul style="list-style-type: none"> <li>○ Moderate</li> <li>○ Small</li> <li>○ Trivial</li> <li>○ Varies</li> <li>○ Don't know</li> </ul> | <i>Summary of findings (GRADE):</i>                                                                                                                                                                                                            |                |                       |                |                                     |                                                                             |
|                                                                                                                                                                                                                                                    |                                                                                                                                                                                                                                                | <b>Outcome</b> | <b>Nº of patients</b> |                | <b>Effect</b>                       | Based on expert consensus, no clear data specified for summary of findings. |
| How substantial are the undesirable anticipated effects of the intervention?                                                                                                                                                                       | <ul style="list-style-type: none"> <li>○ Trivial</li> <li>○ Small</li> <li>○ Moderate</li> <li>○ Large</li> <li>○ Varies</li> <li>○ Don't know</li> </ul>                                                                                      |                | <b>Intervention</b>   | <b>Control</b> | <b>Relative / Absolute (95% CI)</b> |                                                                             |
| Does the balance between desirable effects and undesirable effects favour the option of the comparison?                                                                                                                                            | <ul style="list-style-type: none"> <li>○ Favours the option</li> <li>○ Probably favours the option</li> <li>○ Does not favour either</li> <li>○ Probably favours the comparison</li> <li>○ Favours the comparison</li> <li>○ Varies</li> </ul> |                |                       |                |                                     |                                                                             |
|                                                                                                                                                                                                                                                    |                                                                                                                                                                                                                                                |                |                       |                |                                     |                                                                             |

|                                                                               |                                                                                                                                                                                        |                                                                                                                                                                                                                                                |                                                                                                                                       |  |
|-------------------------------------------------------------------------------|----------------------------------------------------------------------------------------------------------------------------------------------------------------------------------------|------------------------------------------------------------------------------------------------------------------------------------------------------------------------------------------------------------------------------------------------|---------------------------------------------------------------------------------------------------------------------------------------|--|
| <b>Values and preferences</b>                                                 | <p>Is there similarity about how much patients, researchers, clinicians and stake holders value the main Outcomes?<br/>Also include adverse effects and burden of the intervention</p> | <ul style="list-style-type: none"> <li>○ No</li> <li>○ Probably no</li> <li>○ Uncertain</li> <li>○ Probably yes</li> <li>○ Yes</li> <li>○ Varies</li> </ul>                                                                                    |                                                                                                                                       |  |
|                                                                               | <b>Resources</b>                                                                                                                                                                       | <p>What is the certainty of the evidence of resources requirements (costs)?</p>                                                                                                                                                                | <ul style="list-style-type: none"> <li>○ No studies</li> <li>○ Very low</li> <li>○ Low</li> <li>○ Moderate</li> <li>○ High</li> </ul> |  |
| <p>Does the cost effectiveness favour the intervention or the comparison?</p> |                                                                                                                                                                                        | <ul style="list-style-type: none"> <li>○ Favours the option</li> <li>○ Probably favours the option</li> <li>○ Does not favour either</li> <li>○ Probably favours the comparison</li> <li>○ Favours the comparison</li> <li>○ Varies</li> </ul> |                                                                                                                                       |  |

|               |                                               |                                                                                                                                                                                   |  |  |
|---------------|-----------------------------------------------|-----------------------------------------------------------------------------------------------------------------------------------------------------------------------------------|--|--|
| Equity        | What would be the impact on health equity?    | <ul style="list-style-type: none"> <li>○ Increased</li> <li>○ Probably increased</li> <li>○ Uncertain</li> <li>○ Probably reduced</li> <li>○ Reduced</li> <li>○ Varies</li> </ul> |  |  |
| Acceptability | Is the option acceptable to key stakeholders? | <ul style="list-style-type: none"> <li>○ No</li> <li>○ Probably no</li> <li>○ Uncertain</li> <li>○ Probably yes</li> <li>○ Yes</li> <li>○ Varies</li> </ul>                       |  |  |

|                    |                                            |                                                                                                                                                                                                     |  |  |
|--------------------|--------------------------------------------|-----------------------------------------------------------------------------------------------------------------------------------------------------------------------------------------------------|--|--|
| <b>Feasibility</b> | Is the intervention feasible to implement? | <input type="radio"/> No<br><input type="radio"/> Probably no<br><input type="radio"/> Uncertain<br><input type="radio"/> Probably yes<br><input type="radio"/> Yes<br><input type="radio"/> Varies |  |  |
|--------------------|--------------------------------------------|-----------------------------------------------------------------------------------------------------------------------------------------------------------------------------------------------------|--|--|

**Should \_\_\_ be recommended for older adults to prevent and manage falls?**

| Type of recommendation        | Strong recommendation against the intervention<br><input type="radio"/> | Weak recommendation against the intervention<br><input type="radio"/> | Conditional recommendation for either the intervention or the comparison<br><input type="radio"/> | Weak recommendation for the intervention<br><input type="radio"/> | Strong recommendation for the intervention<br><input type="radio"/> |
|-------------------------------|-------------------------------------------------------------------------|-----------------------------------------------------------------------|---------------------------------------------------------------------------------------------------|-------------------------------------------------------------------|---------------------------------------------------------------------|
| Recommendation                |                                                                         |                                                                       |                                                                                                   |                                                                   |                                                                     |
| Justification                 |                                                                         |                                                                       |                                                                                                   |                                                                   |                                                                     |
| Subgroup considerations       |                                                                         |                                                                       |                                                                                                   |                                                                   |                                                                     |
| Implementation considerations |                                                                         |                                                                       |                                                                                                   |                                                                   |                                                                     |
| Monitoring and evaluation     |                                                                         |                                                                       |                                                                                                   |                                                                   |                                                                     |
| Research Priorities           |                                                                         |                                                                       |                                                                                                   |                                                                   |                                                                     |

## References

1. Brignole M, Moya A, de Lange FJ, Deharo JC, Elliott PM, Fanciulli A, et al. 2018 ESC Guidelines for the diagnosis and management of syncope. *Eur Heart J*. 2018 Jun 1;39(21):1883-948.
2. Carey BJ, Potter JF. Cardiovascular causes of falls. *Age Ageing*. 2001 Nov;30 Suppl 4:19-24.
3. Parry SW, Kenny RA. Drop attacks in older adults: systematic assessment has a high diagnostic yield. *J Am Geriatr Soc*. 2005 Jan;53(1):74-8.
4. O'Dwyer C, Bennett K, Langan Y, Fan CW, Kenny RA. Amnesia for loss of consciousness is common in vasovagal syncope. *Europace*. 2011 Jul;13(7):1040-5.
5. Parry SW, Steen IN, Baptist M, Kenny RA. Amnesia for loss of consciousness in carotid sinus syndrome: implications for presentation with falls. *J Am Coll Cardiol*. 2005 Jun 7;45(11):1840-3.
6. Hung CY, Wu TJ, Wang KY, Huang JL, Loh el W, Chen YM, et al. Falls and Atrial Fibrillation in Elderly Patients. *Acta Cardiol Sin*. 2013 Sep;29(5):436-43.
7. Jansen S, Frewen J, Finucane C, de Rooij SE, van der Velde N, Kenny RA. AF is associated with self-reported syncope and falls in a general population cohort. *Age Ageing*. 2015 Jul;44(4):598-603.
8. Koca M, Yavuz BB, Tuna Dogrul R, Caliskan H, Sengul Aycicek G, Ozsurekci C, et al. Impact of atrial fibrillation on frailty and functionality in older adults. *Ir J Med Sci*. 2020 Aug;189(3):917-24.
9. O'Neal WT, Qureshi WT, Judd SE, Bowling CB, Howard VJ, Howard G, et al. Effect of Falls on Frequency of Atrial Fibrillation and Mortality Risk (from the REasons for Geographic And Racial Differences in Stroke Study). *Am J Cardiol*. 2015 Oct 15;116(8):1213-8.
10. Rivera-Chavez JG, Torres-Gutierrez JL, Regalado-Villalobos A, Moreno-Cervantes CA, Luna-Torres S. Association between falls and cardiovascular diseases in the geriatric population. *Arch Cardiol Mex*. 2021;91(1):66-72.
11. Saedon NI, Zainal-Abidin I, Chee KH, Khor HM, Tan KM, Kamaruzzaman SK, et al. Postural blood pressure electrocardiographic changes are associated with falls in older people. *Clin Auton Res*. 2016 Feb;26(1):41-8.
12. Sanders NA, Ganguly JA, Jetter TL, Daccarett M, Wasmund SL, Brignole M, et al. Atrial fibrillation: an independent risk factor for nonaccidental falls in older patients. *Pacing Clin Electrophysiol*. 2012 Aug;35(8):973-9.
13. Wallace ER, Siscovick DS, Sitlani CM, Dublin S, Mitchell P, Robbins JA, et al. Incident atrial fibrillation and the risk of fracture in the cardiovascular health study. *Osteoporos Int*. 2017 Feb;28(2):719-25.
14. Rosado JA, Rubenstein LZ, Robbins AS, Heng MK, Schulman BL, Josephson KR. The value of Holter monitoring in evaluating the elderly patient who falls. *J Am Geriatr Soc*. 1989 May;37(5):430-4.
15. Bhangu J, King-Kallimanis BL, Donoghue OA, Carroll L, Kenny RA. Falls, non-accidental falls and syncope in community-dwelling adults aged 50 years and older: Implications for cardiovascular assessment. *PLoS One*. 2017;12(7):e0180997.
16. Damian J, Pastor-Barriuso R, Valderrama-Gama E, de Pedro-Cuesta J. Factors associated with falls among older adults living in institutions. *BMC Geriatr*. 2013 Jan 15;13:6.
17. Davison J, Brady S, Kenny RA. 24-hour ambulatory electrocardiographic monitoring is unhelpful in the investigation of older persons with recurrent falls. *Age Ageing*. 2005 Jul;34(4):382-6.
18. Heckenbach K, Ostermann T, Schad F, Kroz M, Matthes H. Medication and falls in elderly outpatients: an epidemiological study from a German Pharmacovigilance Network. *Springerplus*. 2014;3:483.
19. Jansen S, Kenny RA, de Rooij SE, van der Velde N. Self-reported cardiovascular conditions are associated with falls and syncope in community-dwelling older adults. *Age Ageing*. 2015 May;44(3):525-9.
20. Lee K, Davis MA, Marcotte JE, Pressler SJ, Liang J, Gallagher NA, et al. Falls in community-dwelling older adults with heart failure: A retrospective cohort study. *Heart Lung*. 2020 May - Jun;49(3):238-50.
21. Stenhagen M, Ekstrom H, Nordell E, Elmstahl S. Falls in the general elderly population: a 3- and 6- year prospective study of risk factors using data from the longitudinal population study 'Good ageing in Skane'. *BMC Geriatr*. 2013 Aug 7;13:81.
22. Just KS, Dallmeier D, Bohme M, Steffens M, Braisch U, Denking MD, et al. Fall-Associated Drugs in Community-Dwelling Older Adults: Results from the ActiFE Ulm Study. *J Am Med Dir Assoc*. 2021 Oct;22(10):2177-83 e10.

23. Shaw BH, Loughin TM, Robinovitch SN, Claydon VE. Cardiovascular responses to orthostasis and their association with falls in older adults. *BMC Geriatr.* 2015 Dec 24;15:174.
24. Ek S, Rizzuto D, Fratiglioni L, Calderon-Larranaga A, Johnell K, Sjoberg L, et al. Risk Factors for Injurious Falls in Older Adults: The Role of Sex and Length of Follow-Up. *J Am Geriatr Soc.* 2019 Feb;67(2):246-53.
25. Frankenthal D, Saban M, Karolinsky D, Lutski M, Sternberg S, Rasooly I, et al. Falls and fear of falling among Israeli community-dwelling older people: a cross-sectional national survey. *Isr J Health Policy Res.* 2021 Apr 2;10(1):29.
26. Lee JS, Kwok T, Leung PC, Woo J. Medical illnesses are more important than medications as risk factors of falls in older community dwellers? A cross-sectional study. *Age Ageing.* 2006 May;35(3):246-51.
27. Vieira LS, Gomes AP, Bierhals IO, Farias-Antunez S, Ribeiro CG, Miranda VIA, et al. Falls among older adults in the South of Brazil: prevalence and determinants. *Rev Saude Publica.* 2018;52:22.
28. Brassington GS, King AC, Bliwise DL. Sleep problems as a risk factor for falls in a sample of community-dwelling adults aged 64-99 years. *J Am Geriatr Soc.* 2000 Oct;48(10):1234-40.
29. Gamage N, Rathnayake N, Alwis G. Prevalence and Associated Risk Factors of Falls among Rural Community-Dwelling Older People: A Cross-Sectional Study from Southern Sri Lanka. *Curr Gerontol Geriatr Res.* 2019;2019:2370796.
30. Paganini-Hill A, Greenia DE, Perry S, Sajjadi SA, Kawas CH, Corrada MM. Lower likelihood of falling at age 90+ is associated with daily exercise a quarter of a century earlier: The 90+ Study. *Age Ageing.* 2017 Nov 1;46(6):951-7.
31. Prudham D, Evans JG. Factors associated with falls in the elderly: a community study. *Age Ageing.* 1981 Aug;10(3):141-6.
32. Sharma PK, Bunker CH, Singh T, Ganguly E, Reddy PS, Newman AB, et al. Burden and Correlates of Falls among Rural Elders of South India: Mobility and Independent Living in Elders Study. *Curr Gerontol Geriatr Res.* 2017;2017:1290936.
33. Aburub AS, Phillips SP, Curcio CL, Guerra RO, Khalil H, Auais M. Circumstances and Factors Associated With Falls Among Community-Dwelling Older Adults Diagnosed With Heart Disease Using the International Mobility in Aging Study (IMIAS). *J Geriatr Phys Ther.* 2021 Jun 30.
34. Alamgir H, Wong NJ, Hu Y, Yu M, Marshall A, Yu S. Epidemiology of falls in older adults in Texas. *South Med J.* 2015 Feb;108(2):119-24.
35. Chen YM, Hwang SJ, Chen LK, Chen DY, Lan CF. Risk factors for falls among elderly men in a veterans home. *J Chin Med Assoc.* 2008 Apr;71(4):180-5.
36. Hartog LC, Cizmar-Sweelssen M, Knipscheer A, Groenier KH, Kleefstra N, Bilo HJ, et al. The association between orthostatic hypotension, falling and successful rehabilitation in a nursing home population. *Arch Gerontol Geriatr.* 2015 Sep-Oct;61(2):190-6.
37. Hosseini S, Zohani Z, Kheyrikhah F, Bijani A, Zabihi A. Relationship between falling and chronic diseases in the elderly: A study derived from amirkola health and ageing project. *Iranian Red Crescent Medical Journal.* 2020;22(8).
38. Kao S, Wang YC, Tzeng YM, Liang CK, Lin FG. Interactive effect between depression and chronic medical conditions on fall risk in community-dwelling elders. *Int Psychogeriatr.* 2012 Sep;24(9):1409-18.
39. Kelly KD, Pickett W, Yiannakoulis N, Rowe BH, Schopflocher DP, Svenson L, et al. Medication use and falls in community-dwelling older persons. *Age Ageing.* 2003 Sep;32(5):503-9.
40. Menant JC, Wong AK, Trollor JN, Close JC, Lord SR. Depressive Symptoms and Orthostatic Hypotension Are Risk Factors for Unexplained Falls in Community-Living Older People. *J Am Geriatr Soc.* 2016 May;64(5):1073-8.
41. Ooi TC, Singh DKA, Shahar S, Rajab NF, Vanoh D, Sharif R, et al. Incidence and multidimensional predictors of occasional and recurrent falls among Malaysian community-dwelling older persons. *BMC Geriatr.* 2021 Mar 2;21(1):154.
42. Sagawa N, Marcum ZA, Boudreau RM, Hanlon JT, Albert SM, O'Hare C, et al. Low blood pressure levels for fall injuries in older adults: the Health, Aging and Body Composition Study. *Eur J Ageing.* 2018 Sep;15(3):321-30.
43. Bhangu J, McMahon CG, Hall P, Bennett K, Rice C, Crean P, et al. Long-term cardiac monitoring in older adults with unexplained falls and syncope. *Heart.* 2016 May;102(9):681-6.

44. Choi EJ, Kim SA, Kim NR, Rhee JA, Yun YW, Shin MH. Risk factors for falls in older Korean adults: the 2011 Community Health Survey. *J Korean Med Sci.* 2014 Nov;29(11):1482-7.
45. dos Reis K, de Jesus C. Cohort study of institutionalized elderly people: fall risk factors from the nursing diagnosis. *Revista Latino-Americana de Enfermagem.* 2015;23(6):1130-8.
46. Mitchell RJ, Lord SR, Harvey LA, Close JC. Obesity and falls in older people: mediating effects of disease, sedentary behavior, mood, pain and medication use. *Arch Gerontol Geriatr.* 2015 Jan-Feb;60(1):52-8.
47. Paliwal Y, Slattum PW, Ratliff SM. Chronic Health Conditions as a Risk Factor for Falls among the Community-Dwelling US Older Adults: A Zero-Inflated Regression Modeling Approach. *Biomed Res Int.* 2017;2017:5146378.
48. Turusheva A, Frolova E, Kotovskaya Y, Petrosyan Y, Dumbadze R. Association Between Arterial Stiffness, Frailty and Fall-Related Injuries in Older Adults. *Vasc Health Risk Manag.* 2020;16:307-16.
49. Akande-Sholabi W, Ogundipe FS, Adebusoye LA. Medications and the risk of falls among older people in a geriatric centre in Nigeria: a cross-sectional study. *Int J Clin Pharm.* 2021 Feb;43(1):236-45.
50. George M, Azhar G, Kilmer G, Miller S, Bynum L, Balamurugan A. Falls and comorbid conditions among community dwelling Arkansas older adults from a population-based survey. *J Ark Med Soc.* 2014 Dec;111(7):136-9.
51. Ha VT, Nguyen TN, Nguyen TX, Nguyen HTT, Nguyen TTH, Nguyen AT, et al. Prevalence and Factors Associated with Falls among Older Outpatients. *Int J Environ Res Public Health.* 2021 Apr 12;18(8).
52. Hung CH, Wang CJ, Tang TC, Chen LY, Peng LN, Hsiao FY, et al. Recurrent falls and its risk factors among older men living in the veterans retirement communities: A cross-sectional study. *Arch Gerontol Geriatr.* 2017 May - Jun;70:214-8.
53. Teoh RJJ, Mat S, Khor HM, Kamaruzzaman SB, Tan MP. Falls, frailty, and metabolic syndrome in urban dwellers aged 55 years and over in the Malaysian elders longitudinal research (MELoR) study - a cross-sectional Study. *Postgrad Med.* 2021 Apr;133(3):351-6.
54. Zhao YL, Alderden J, Lind B, Stibrany J. Risk factors for falls in homebound community-dwelling older adults. *Public Health Nurs.* 2019 Nov;36(6):772-8.
55. Assantachai P, Praditsuwan R, Chatthanawaree W, Pisalsarakij D, Thamlikitkul V. Risk factors for falls in the Thai elderly in an urban community. *J Med Assoc Thai.* 2003 Feb;86(2):124-30.
56. Bergland A, Jarnlo GB, Laake K. Predictors of falls in the elderly by location. *Aging Clin Exp Res.* 2003 Feb;15(1):43-50.
57. Chan KM, Pang WS, Ee CH, Ding YY, Choo P. Epidemiology of falls among the elderly community dwellers in Singapore. *Singapore Med J.* 1997 Oct;38(10):427-31.
58. Jitapunkul S, Songkhla MN, Chayovan N, Chirawatkul A, Choprapawon C, Kachondham Y, et al. Falls and their associated factors: a national survey of the Thai elderly. *J Med Assoc Thai.* 1998 Apr;81(4):233-42.
59. Margolis KL, Buchner DM, LaMonte MJ, Zhang Y, Di C, Rillamas-Sun E, et al. Hypertension Treatment and Control and Risk of Falls in Older Women. *J Am Geriatr Soc.* 2019 Apr;67(4):726-33.
60. Maurer MS, Cohen S, Cheng H. The degree and timing of orthostatic blood pressure changes in relation to falls in nursing home residents. *J Am Med Dir Assoc.* 2004 Jul-Aug;5(4):233-8.
61. Sibley KM, Voth J, Munce SE, Straus SE, Jaglal SB. Chronic disease and falls in community-dwelling Canadians over 65 years old: a population-based study exploring associations with number and pattern of chronic conditions. *BMC Geriatr.* 2014 Feb 14;14:22.
62. Kario K, Tobin JN, Wolfson LI, Whipple R, Derby CA, Singh D, et al. Lower standing systolic blood pressure as a predictor of falls in the elderly: a community-based prospective study. *J Am Coll Cardiol.* 2001 Jul;38(1):246-52.
63. Klein D, Nagel G, Kleiner A, Ulmer H, Rehberger B, Concini H, et al. Blood pressure and falls in community-dwelling people aged 60 years and older in the VHM&PP cohort. *BMC Geriatr.* 2013 May 21;13:50.
64. Song Y, Deng Y, Li J, Hao B, Cai Y, Chen J, et al. Associations of falls and severe falls with blood pressure and frailty among Chinese community-dwelling oldest olds: The Chinese Longitudinal Health and Longevity Study. *Aging (Albany NY).* 2021 Jun 23;13(12):16527-40.



65. Chang NT, Yang NP, Chou P. Incidence, risk factors and consequences of falling injuries among the community-dwelling elderly in Shihpai, Taiwan. *Aging Clin Exp Res.* 2010 Feb;22(1):70-7.
66. Dokuzlar O, Koc Okudur S, Soysal P, Kocyigit SE, Yavuz I, Smith L, et al. Factors that Increase Risk of Falling in Older Men according to Four Different Clinical Methods. *Exp Aging Res.* 2020 Jan-Feb;46(1):83-92.
67. Downton JH, Andrews K. Prevalence, characteristics and factors associated with falls among the elderly living at home. *Aging (Milano).* 1991 Sep;3(3):219-28.
68. Goh CH, Ng SC, Kamaruzzaman SB, Chin AV, Tan MP. Standing beat-to-beat blood pressure variability is reduced among fallers in the Malaysian Elders Longitudinal Study. *Medicine (Baltimore).* 2017 Oct;96(42):e8193.
69. Ham AC, van Dijk SC, Swart KMA, Enneman AW, van der Zwaluw NL, Brouwer-Brolsma EM, et al. Beta-blocker use and fall risk in older individuals: Original results from two studies with meta-analysis. *Br J Clin Pharmacol.* 2017 Oct;83(10):2292-302.
70. Herndon JG, Helmick CG, Sattin RW, Stevens JA, DeVito C, Wingo PA. Chronic medical conditions and risk of fall injury events at home in older adults. *J Am Geriatr Soc.* 1997 Jun;45(6):739-43.
71. Juraschek SP, Lipsitz LA, Beach JL, Mukamal KJ. Association of Orthostatic Hypotension Timing With Clinical Events in Adults With Diabetes and Hypertension: Results From the ACCORD Trial. *Am J Hypertens.* 2019 Jun 11;32(7):684-94.
72. Kocyigit SE, Erken N, Dokuzlar O, Dost Gunay FS, Ates Bulut E, Aydin AE, et al. Postural blood pressure changes in the elderly: orthostatic hypotension and hypertension. *Blood Press Monit.* 2020 Oct;25(5):267-70.
73. Lawlor DA, Patel R, Ebrahim S. Association between falls in elderly women and chronic diseases and drug use: cross sectional study. *BMJ.* 2003 Sep 27;327(7417):712-7.
74. Liao K, Pu S, Lin C, Chang H, Chen Y, Liu M. Association between the metabolic syndrome and its components with falls in community-dwelling older adults. *Metabolic Syndrome and Related Disorders.* 2012;10(6):447-51.
75. Lipsitz LA, Jonsson PV, Kelley MM, Koestner JS. Causes and correlates of recurrent falls in ambulatory frail elderly. *J Gerontol.* 1991 Jul;46(4):M114-22.
76. Mitchell R, Watson W, Milat A, Chung A, Lord S. Health and lifestyle risk factors for falls in a large population-based sample of older people in Australia. *Journal of Safety Research.* 2013;45:7-13.
77. Wong AK, Lord SR, Trollor JN, Sturnieks DL, Delbaere K, Menant J, et al. High arterial pulse wave velocity is a risk factor for falls in community-dwelling older people. *J Am Geriatr Soc.* 2014 Aug;62(8):1534-9.
78. Zia A, Kamaruzzaman SB, Myint PK, Tan MP. The association of antihypertensives with postural blood pressure and falls among seniors residing in the community: a case-control study. *Eur J Clin Invest.* 2015 Oct;45(10):1069-76.
79. White WB, Wakefield DB, Moscufo N, Guttmann CRG, Kaplan RF, Bohannon RW, et al. Effects of Intensive Versus Standard Ambulatory Blood Pressure Control on Cerebrovascular Outcomes in Older People (INFINITY). *Circulation.* 2019 Nov 12;140(20):1626-35.
80. Group SR, Wright JT, Jr., Williamson JD, Whelton PK, Snyder JK, Sink KM, et al. A Randomized Trial of Intensive versus Standard Blood-Pressure Control. *N Engl J Med.* 2015 Nov 26;373(22):2103-16.
81. Sterne JAC, Savovic J, Page MJ, Elbers RG, Blencowe NS, Boutron I, et al. RoB 2: a revised tool for assessing risk of bias in randomised trials. *BMJ.* 2019 Aug 28;366:14898.
82. Aronow WS, Ahn C. Association of postprandial hypotension with incidence of falls, syncope, coronary events, stroke, and total mortality at 29-month follow-up in 499 older nursing home residents. *J Am Geriatr Soc.* 1997 Sep;45(9):1051-3.
83. Le Couteur DG, Fisher AA, Davis MW, McLean AJ. Postprandial systolic blood pressure responses of older people in residential care: association with risk of falling. *Gerontology.* 2003 Jul-Aug;49(4):260-4.
84. Puisieux F, Bulckaen H, Fauchais AL, Drumez S, Salomez-Granier F, Dewailly P. Ambulatory blood pressure monitoring and postprandial hypotension in elderly persons with falls or syncope. *J Gerontol A Biol Sci Med Sci.* 2000 Sep;55(9):M535-40.
85. Schoon Y, Olde Rikkert MG, Rongen S, Lagro J, Schalk B, Claassen JA. Head turning-induced hypotension in elderly people. *PLoS One.* 2013;8(8):e72837.
86. Davies AJ, Steen N, Kenny RA. Carotid sinus hypersensitivity is common in older patients presenting to an accident and emergency department with unexplained falls. *Age Ageing.* 2001 Jul;30(4):289-93.

87. Freitas J, Santos R, Azevedo E, Carvalho M. Carotid sinus syndrome in an unselected population of eight hundred consecutive patients with syncope. Prevalence and clinical profile. *Rev Port Cardiol.* 2004 Jun;23(6):835-40.
88. Kumar NP, Thomas A, Mudd P, Morris RO, Masud T. The usefulness of carotid sinus massage in different patient groups. *Age Ageing.* 2003 Nov;32(6):666-9.
89. Anpalahan M, Gibson S. The prevalence of Neurally Mediated Syncope in older patients presenting with unexplained falls. *Eur J Intern Med.* 2012 Mar;23(2):e48-52.
90. Murphy AL, Rowbotham BJ, Boyle RS, Thew CM, Fardoulis JA, Wilson K. Carotid sinus hypersensitivity in elderly nursing home patients. *Aust N Z J Med.* 1986 Feb;16(1):24-7.
91. Kenny RA, Richardson DA, Steen N, Bexton RS, Shaw FE, Bond J. Carotid sinus syndrome: a modifiable risk factor for nonaccidental falls in older adults (SAFE PACE). *J Am Coll Cardiol.* 2001 Nov 1;38(5):1491-6.
92. Parry SW, Steen N, Bexton RS, Tynan M, Kenny RA. Pacing in elderly recurrent fallers with carotid sinus hypersensitivity: a randomised, double-blind, placebo controlled crossover trial. *Heart.* 2009 Mar;95(5):405-9.
93. Ryan DJ, Nick S, Colette SM, Roseanne K. Carotid sinus syndrome, should we pace? A multicentre, randomised control trial (Safespace 2). *Heart.* 2010 Mar;96(5):347-51.
94. Donoghue OA, O'Connell MDL, Bourke R, Kenny RA. Is orthostatic hypotension and co-existing supine and seated hypertension associated with future falls in community-dwelling older adults? Results from The Irish Longitudinal Study on Ageing (TILDA). *PLoS One.* 2021;16(5):e0252212.
95. Finucane C, O'Connell MD, Donoghue O, Richardson K, Savva GM, Kenny RA. Impaired Orthostatic Blood Pressure Recovery Is Associated with Unexplained and Injurious Falls. *J Am Geriatr Soc.* 2017 Mar;65(3):474-82.
96. Gangavati A, Hajar I, Quach L, Jones RN, Kiely DK, Gagnon P, et al. Hypertension, orthostatic hypotension, and the risk of falls in a community-dwelling elderly population: the maintenance of balance, independent living, intellect, and zest in the elderly of Boston study. *J Am Geriatr Soc.* 2011 Mar;59(3):383-9.
97. Graafmans WC, Ooms ME, Hofstee HM, Bezemer PD, Bouter LM, Lips P. Falls in the elderly: a prospective study of risk factors and risk profiles. *Am J Epidemiol.* 1996 Jun 1;143(11):1129-36.
98. Heitterachi E, Lord SR, Meyerkort P, McCloskey I, Fitzpatrick R. Blood pressure changes on upright tilting predict falls in older people. *Age Ageing.* 2002 May;31(3):181-6.
99. McDonald C, Pearce M, Kerr SR, Newton J. A prospective study of the association between orthostatic hypotension and falls: definition matters. *Age Ageing.* 2017 May 1;46(3):439-45.
100. Moloney D, O'Connor J, Newman L, Scarlett S, Hernandez B, Kenny RA, et al. Clinical clustering of eight orthostatic haemodynamic patterns in The Irish Longitudinal Study on Ageing (TILDA). *Age Ageing.* 2021 May 5;50(3):854-60.
101. Ooi WL, Hossain M, Lipsitz LA. The association between orthostatic hypotension and recurrent falls in nursing home residents. *Am J Med.* 2000 Feb;108(2):106-11.
102. Rutan GH, Hermanson B, Bild DE, Kittner SJ, LaBaw F, Tell GS. Orthostatic hypotension in older adults. The Cardiovascular Health Study. CHS Collaborative Research Group. *Hypertension.* 1992 Jun;19(6 Pt 1):508-19.
103. Zhao M, Li S, Xu Y, Su X, Jiang H. Developing a Scoring Model to Predict the Risk of Injurious Falls in Elderly Patients: A Retrospective Case-Control Study in Multicenter Acute Hospitals. *Clin Interv Aging.* 2020;15:1767-78.
104. Davies AJ, Kenny RA. Falls presenting to the accident and emergency department: types of presentation and risk factor profile. *Age Ageing.* 1996 Sep;25(5):362-6.
105. Jodaitis L, Vaillant F, Snacken M, Boland B, Spinewine A, Dalleur O, et al. Orthostatic hypotension and associated conditions in geriatric inpatients. *Acta Clin Belg.* 2015 Aug;70(4):251-8.
106. Romero-Ortuno R, Cogan L, Foran T, Kenny RA, Fan CW. Continuous noninvasive orthostatic blood pressure measurements and their relationship with orthostatic intolerance, falls, and frailty in older people. *J Am Geriatr Soc.* 2011 Apr;59(4):655-65.
107. Tinetti ME, Williams TF, Mayewski R. Fall risk index for elderly patients based on number of chronic disabilities. *Am J Med.* 1986 Mar;80(3):429-34.
108. van der Velde N, van den Meiracker AH, Stricker BH, van der Cammen TJ. Measuring orthostatic hypotension with the Finometer device: is a blood pressure drop of one heartbeat clinically relevant? *Blood Press Monit.* 2007 Jun;12(3):167-71.
109. Bumin G, Uyanik M, Aki E, Kayihan H. An investigation of risk factors for falls in elderly people in a Turkish rest home: a pilot study. *Aging Clin Exp Res.* 2002 Jun;14(3):192-6.
110. Campbell AJ, Borrie MJ, Spears GF. Risk factors for falls in a community-based prospective study of people 70 years and older. *J Gerontol.* 1989 Jul;44(4):M112-7.

111. Campbell AJ, Reinken J, Allan BC, Martinez GS. Falls in old age: a study of frequency and related clinical factors. *Age Ageing*. 1981 Nov;10(4):264-70.
112. Ensrud KE, Nevitt MC, Yunis C, Hulley SB, Grimm RH, Cummings SR. Postural hypotension and postural dizziness in elderly women. The study of osteoporotic fractures. The Study of Osteoporotic Fractures Research Group. *Arch Intern Med*. 1992 May;152(5):1058-64.
113. Freud T, Punchik B, Press Y. Orthostatic Hypotension and Mortality in Elderly Frail Patients: A Retrospective Cross-Sectional Study. *Medicine (Baltimore)*. 2015 Jun;94(24):e977.
114. Hartog LC, Cimzar-Sweelssen M, Knipscheer A, Groenier KH, Kleefstra N, Bilo HJ, et al. Orthostatic hypotension does not predict recurrent falling in a nursing home population. *Arch Gerontol Geriatr*. 2017 Jan - Feb;68:39-43.
115. Liu BA, Topper AK, Reeves RA, Gryfe C, Maki BE. Falls among older people: relationship to medication use and orthostatic hypotension. *J Am Geriatr Soc*. 1995 Oct;43(10):1141-5.
116. Luukinen H, Koski K, Kivela SL, Laippala P. Social status, life changes, housing conditions, health, functional abilities and life-style as risk factors for recurrent falls among the home-dwelling elderly. *Public Health*. 1996 Mar;110(2):115-8.
117. Mader SL, Josephson KR, Rubenstein LZ. Low prevalence of postural hypotension among community-dwelling elderly. *JAMA*. 1987 Sep 18;258(11):1511-4.
118. Pasma JH, Bijlsma AY, Klip JM, Stijntjes M, Blauw GJ, Muller M, et al. Blood pressure associates with standing balance in elderly outpatients. *PLoS One*. 2014;9(9):e106808.
119. Schell K, Lyons D, Bodt B. Orthostatic Hypotension and Falls in Hospitalized Older Adults. *Clin Nurs Res*. 2021 Jun;30(5):699-706.
120. Welmer AK, Wang R, Rizzuto D, Ek S, Vetrano DL, Qiu C. Associations of blood pressure with risk of injurious falls in old age vary by functional status: A cohort study. *Exp Gerontol*. 2020 Oct 15;140:111038.
121. Kocyigit SE, Ates Bulut EAP, Aydin AE, Isik ATP. Improvement of nutritional status enhances cognitive and physical functions in older adults with orthostatic hypotension. *Nutrition*. 2021 Oct;90:111261.
122. Bhangu J HP, Rice C, McMahon CG, Crean P, Sutton R, Kenny R. FUSE: Falls and Unexplained Syncope in the Elderly, The Utility of Implantable Loop Recorders. *Irish Journal of Medical Science*. 2014;183.
123. Juraschek SP, Appel LJ, C MM, Mukamal KJ, Lipsitz LA, Blackford AL, et al. Comparison of supine and seated orthostatic hypotension assessments and their association with falls and orthostatic symptoms. *J Am Geriatr Soc*. 2022 Apr 22.
124. Tinetti ME, Baker DI, McAvay G, Claus EB, Garrett P, Gottschalk M, et al. A multifactorial intervention to reduce the risk of falling among elderly people living in the community. *N Engl J Med*. 1994 Sep 29;331(13):821-7.
125. Close J, Ellis M, Hooper R, Glucksman E, Jackson S, Swift C. Prevention of falls in the elderly trial (PROFET): a randomised controlled trial. *Lancet*. 1999 Jan 9;353(9147):93-7.
126. Gillespie LD, Robertson MC, Gillespie WJ, Sherrington C, Gates S, Clemson LM, et al. Interventions for preventing falls in older people living in the community. *Cochrane Database Syst Rev*. 2012 Sep 12(9):CD007146.
127. Montero-Odasso MM, Kamkar N, Pieruccini-Faria F, Osman A, Sarquis-Adamson Y, Close J, et al. Evaluation of Clinical Practice Guidelines on Fall Prevention and Management for Older Adults: A Systematic Review. *JAMA Netw Open*. 2021 Dec 1;4(12):e2138911.
128. Dautzenberg L, Beglinger S, Tsokani S, Zevgiti S, Rajjmann R, Rodondi N, et al. Interventions for preventing falls and fall-related fractures in community-dwelling older adults: A systematic review and network meta-analysis. *J Am Geriatr Soc*. 2021 Oct;69(10):2973-84.
129. Maggi R, Rafanelli M, Ceccofiglio A, Solari D, Brignole M, Ungar A. Additional diagnostic value of implantable loop recorder in patients with initial diagnosis of real or apparent transient loss of consciousness of uncertain origin [Europace 2014 16: 1226-1230]. *Europace*. 2015 Dec;17(12):1847.
130. Rafanelli M, Ruffolo E, Chisciotti VM, Brunetti MA, Ceccofiglio A, Tesi F, et al. Clinical aspects and diagnostic relevance of neuroautonomic evaluation in patients with unexplained falls. *Aging Clin Exp Res*. 2014 Feb;26(1):33-7.
131. Panel on Prevention of Falls in Older Persons, American Geriatrics Society and British Geriatrics Society. Summary of the Updated American Geriatrics Society/British Geriatrics Society clinical practice guideline for prevention of falls in older persons. *J Am Geriatr Soc*. 2011 Jan;59(1):148-57.

## Working Group 4: Exercise and Falls

### Recommendations for Working Group 4: Exercise and Falls

**Recommendation 1 (Interventions):** We recommend exercise programmes for fall prevention for community-dwelling older adults that include balance challenging and functional exercises (e.g. sit-to-stand, stepping) should be offered with sessions three times or more weekly which are individualized, progressed in intensity for at least 12 weeks and continued longer for greater effect. **GRADE: 1A**

**Recommendation 2 (Interventions):** We recommend inclusion, when feasible, of Tai Chi and/or additional individualized progressive resistance strength training. **GRADE: 1B**

| <i>Population:</i>             | Older adults                                                           | <i>Objective: Should community-dwelling older adults participate in exercise for falls prevention?</i>                                                             |                                                                                                                                                                                                                                                                                                                                                                                                                                                                                                                                                                                                                                                                                                                                                                                                                             |                                         |
|--------------------------------|------------------------------------------------------------------------|--------------------------------------------------------------------------------------------------------------------------------------------------------------------|-----------------------------------------------------------------------------------------------------------------------------------------------------------------------------------------------------------------------------------------------------------------------------------------------------------------------------------------------------------------------------------------------------------------------------------------------------------------------------------------------------------------------------------------------------------------------------------------------------------------------------------------------------------------------------------------------------------------------------------------------------------------------------------------------------------------------------|-----------------------------------------|
| <i>Intervention:</i>           | Exercise, as a stand-alone intervention, as a fall prevention activity |                                                                                                                                                                    |                                                                                                                                                                                                                                                                                                                                                                                                                                                                                                                                                                                                                                                                                                                                                                                                                             |                                         |
| <i>Comparison:</i>             | Usual care                                                             |                                                                                                                                                                    |                                                                                                                                                                                                                                                                                                                                                                                                                                                                                                                                                                                                                                                                                                                                                                                                                             |                                         |
| <i>Main outcomes:</i>          | Falls                                                                  |                                                                                                                                                                    |                                                                                                                                                                                                                                                                                                                                                                                                                                                                                                                                                                                                                                                                                                                                                                                                                             |                                         |
| <i>Setting:</i>                | Community                                                              |                                                                                                                                                                    |                                                                                                                                                                                                                                                                                                                                                                                                                                                                                                                                                                                                                                                                                                                                                                                                                             |                                         |
| <i>Perspective:</i>            | Global guidelines: older community-dwellers, clinicians, policy makers |                                                                                                                                                                    |                                                                                                                                                                                                                                                                                                                                                                                                                                                                                                                                                                                                                                                                                                                                                                                                                             |                                         |
| Decision Domain                |                                                                        | Judgements                                                                                                                                                         | Research Evidence                                                                                                                                                                                                                                                                                                                                                                                                                                                                                                                                                                                                                                                                                                                                                                                                           | Additional Considerations /Explanations |
| <b>Priority of the Problem</b> | Is the problem a priority?                                             | <ul style="list-style-type: none"> <li>○ No</li> <li>○ Probably no</li> <li>○ Uncertain</li> <li>○ Probably yes</li> <li>● <b>Yes</b></li> <li>○ Varies</li> </ul> | Falls in older age is a significant global public health issue as at least one-third of community-dwelling people aged 65 years or above fall each year [1, 2]. Falls also lead to injuries including fractures. The frequency of falls and fall-related injuries increases with age [3, 4]. In the United States, three million older people are treated in emergency departments for falls injuries each year [5], with one in five falls causing a serious injury including hip fracture or a head injury [6]. In Australia, the fall-related injury cases caused 1.2 million days of care over a year, and the cost of falls is predicted to rise to \$1.4 billion by 2051 [7] Falls and fall-related injuries increase morbidity and substantially reduce independence, as well as health-related quality of life [8]. |                                         |
|                                |                                                                        |                                                                                                                                                                    |                                                                                                                                                                                                                                                                                                                                                                                                                                                                                                                                                                                                                                                                                                                                                                                                                             |                                         |

|                                          |                                                                                                                                        |                                                                                                                                                                                                                                                                                                         |                                                                                                                                                                                                                                                                                                                                                                                                                                                                                                       |                            |                                          |                                                                                                               |
|------------------------------------------|----------------------------------------------------------------------------------------------------------------------------------------|---------------------------------------------------------------------------------------------------------------------------------------------------------------------------------------------------------------------------------------------------------------------------------------------------------|-------------------------------------------------------------------------------------------------------------------------------------------------------------------------------------------------------------------------------------------------------------------------------------------------------------------------------------------------------------------------------------------------------------------------------------------------------------------------------------------------------|----------------------------|------------------------------------------|---------------------------------------------------------------------------------------------------------------|
| <b>Benefits and harms</b><br>(see below) | Is there important uncertainty or variability in how much patients, researchers, clinicians and stake holders value the main outcomes? | <ul style="list-style-type: none"> <li>○ Important uncertainty or variability</li> <li>○ Possibly important uncertainty or variability</li> <li>○ Probably no important uncertainty of variability</li> <li>● <b>No important uncertainty of variability</b></li> <li>○ No known undesirable</li> </ul> | <i>Relative importance of the main outcomes of interest:</i>                                                                                                                                                                                                                                                                                                                                                                                                                                          |                            |                                          | Not formally assessed. It is assumed that most people place a high value on falls and fall-injury prevention. |
|                                          |                                                                                                                                        |                                                                                                                                                                                                                                                                                                         | <b>Outcome</b>                                                                                                                                                                                                                                                                                                                                                                                                                                                                                        | <b>Relative Importance</b> | <b>Certainty of the evidence (GRADE)</b> |                                                                                                               |
|                                          |                                                                                                                                        |                                                                                                                                                                                                                                                                                                         | Exercise (overall)                                                                                                                                                                                                                                                                                                                                                                                                                                                                                    | Critical                   | ⊕⊕⊕⊕<br>HIGH                             |                                                                                                               |
|                                          |                                                                                                                                        |                                                                                                                                                                                                                                                                                                         | Balance and functional exercise                                                                                                                                                                                                                                                                                                                                                                                                                                                                       | Critical                   | ⊕⊕⊕⊕<br>HIGH                             |                                                                                                               |
|                                          |                                                                                                                                        |                                                                                                                                                                                                                                                                                                         | Multiple categories of exercise                                                                                                                                                                                                                                                                                                                                                                                                                                                                       | Critical                   | ⊕⊕⊕○<br>MODERATE                         |                                                                                                               |
|                                          |                                                                                                                                        |                                                                                                                                                                                                                                                                                                         | Tai Chi                                                                                                                                                                                                                                                                                                                                                                                                                                                                                               | Important                  | ⊕⊕⊕○<br>MODERATE                         |                                                                                                               |
|                                          |                                                                                                                                        |                                                                                                                                                                                                                                                                                                         | Dance                                                                                                                                                                                                                                                                                                                                                                                                                                                                                                 | Important                  | ⊕○○○<br>VERY LOW                         |                                                                                                               |
|                                          |                                                                                                                                        |                                                                                                                                                                                                                                                                                                         | Resistance exercise                                                                                                                                                                                                                                                                                                                                                                                                                                                                                   | Important                  | ⊕○○○<br>VERY LOW                         |                                                                                                               |
|                                          |                                                                                                                                        |                                                                                                                                                                                                                                                                                                         | General physical activity (e.g. walking)                                                                                                                                                                                                                                                                                                                                                                                                                                                              | Important                  | ⊕○○○<br>VERY LOW                         |                                                                                                               |
|                                          |                                                                                                                                        |                                                                                                                                                                                                                                                                                                         |                                                                                                                                                                                                                                                                                                                                                                                                                                                                                                       |                            | ○○○○<br>MODERATE                         |                                                                                                               |
|                                          | What is the overall certainty of this evidence?                                                                                        | <ul style="list-style-type: none"> <li>○ No studies</li> <li>○ Very low</li> <li>○ Low</li> <li>○ Moderate</li> <li>● <b>High</b></li> </ul>                                                                                                                                                            | <b>Previous evidence showing greater impacts of high dose exercise interventions for falls prevention [9, 10].</b><br>Previous systematic reviews [9] showed the median intervention duration of interventions that were effective was six months with a total of 52 hours (approximately two hours per week) and that exercise programs that involved 3+ total hours per week and included balance and functional exercises were particularly effective (pooled rate ratio 0.58, 0.45 to 0.76) [10]. |                            |                                          |                                                                                                               |

|                                                                                                         |                                                                                                                                                                                                                                                       |                                             |                                        |                                 |                            |                                                                                                                                                                                                                                                                                                                                                                                                                                                                                                                                                                                                                                             |
|---------------------------------------------------------------------------------------------------------|-------------------------------------------------------------------------------------------------------------------------------------------------------------------------------------------------------------------------------------------------------|---------------------------------------------|----------------------------------------|---------------------------------|----------------------------|---------------------------------------------------------------------------------------------------------------------------------------------------------------------------------------------------------------------------------------------------------------------------------------------------------------------------------------------------------------------------------------------------------------------------------------------------------------------------------------------------------------------------------------------------------------------------------------------------------------------------------------------|
| How substantial are the desirable anticipated effects of the intervention?                              | <ul style="list-style-type: none"> <li>• <b>Large</b></li> <li>○ Moderate</li> <li>○ Small</li> <li>○ Trivial</li> <li>○ Varies</li> <li>○ Don't know</li> </ul>                                                                                      | <b>Summary of findings (GRADE):</b>         |                                        |                                 |                            | <b>Additional benefits from physical activity</b><br>Evidence reviews for physical activity guidelines confirm positive outcomes associated with physical activity in the areas of mortality, adiposity, cognition, functional ability, mental health, incidence of health conditions including cancer, cardiovascular disease, type 2 diabetes, osteoporosis [11] well as broader benefits of physical activity, including stress management, improved self-efficacy, sleep and social wellbeing [12].                                                                                                                                     |
|                                                                                                         |                                                                                                                                                                                                                                                       | <b>Outcome (rate of falls, rate ration)</b> | <b>Nº of patients</b>                  |                                 | <b>Effect</b>              |                                                                                                                                                                                                                                                                                                                                                                                                                                                                                                                                                                                                                                             |
|                                                                                                         | <b>Exercise (per 1000-person years)</b>                                                                                                                                                                                                               |                                             | <b>Control (per 1000-person years)</b> | <b>Relative effect (95% CI)</b> | <b>Difference (95% CI)</b> |                                                                                                                                                                                                                                                                                                                                                                                                                                                                                                                                                                                                                                             |
|                                                                                                         |                                                                                                                                                                                                                                                       | Exercise (overall)                          | 646<br>(95% CI 604-706)                | 850                             | 0.76<br>(0.71-0.83)        | 204 fewer per 1000 (from 144 to 244 fewer)                                                                                                                                                                                                                                                                                                                                                                                                                                                                                                                                                                                                  |
| How substantial are the undesirable anticipated effects of the intervention?                            | <ul style="list-style-type: none"> <li>• <b>Trivial</b></li> <li>○ Small</li> <li>○ Moderate</li> <li>○ Large</li> <li>○ Varies</li> <li>○ Don't know</li> </ul>                                                                                      | Balance and functional exercise             | 649<br>(95% CI 587-701)                | 865                             | 0.75<br>(0.69-0.81)        | 216 fewer per 1000 (from 164 to 278 fewer)                                                                                                                                                                                                                                                                                                                                                                                                                                                                                                                                                                                                  |
| Does the balance between desirable effects and undesirable effects favour the option of the comparison? | <ul style="list-style-type: none"> <li>• <b>Favours the option</b></li> <li>○ Probably favours the option</li> <li>○ Does not favour either</li> <li>○ Probably favours the comparison</li> <li>○ Favours the comparison</li> <li>○ Varies</li> </ul> | Multiple categories of exercise             | 873<br>(95% CI 696-1097)               | 1180                            | 0.74<br>(0.59-0.93)        | 307 fewer per 1000 (from 83 to 484 fewer)                                                                                                                                                                                                                                                                                                                                                                                                                                                                                                                                                                                                   |
|                                                                                                         |                                                                                                                                                                                                                                                       | Tai Chi                                     | 993<br>(95% CI 787-1251)               | 1290                            | 0.77<br>(0.61-0.97)        | 297 fewer per 1000 (from 39 to 493 fewer)                                                                                                                                                                                                                                                                                                                                                                                                                                                                                                                                                                                                   |
|                                                                                                         |                                                                                                                                                                                                                                                       | Dance                                       | 1072<br>(95% CI 784-1464)              | 800                             | 1.34<br>(0.98-1.83)        | 272 more per 1000 (from 16 fewer to 664 more)                                                                                                                                                                                                                                                                                                                                                                                                                                                                                                                                                                                               |
|                                                                                                         |                                                                                                                                                                                                                                                       |                                             |                                        |                                 |                            | <b>Risk of physical activity</b><br>The benefits of regular physical activity generally outweigh the risk of harm from adverse events [12, 13]. Adverse events can happen during any physical activity and include musculoskeletal injuries, cardiac events, heat injuries and infectious disease[13] but adverse events reported in trials are usually non-serious [8] [14]. Activities involving contact or collision with other people have higher injury rates but the risk of serious injury is relatively low with non-contact exercise [13]. Musculoskeletal injuries are usually related to the type of the activity, usual dose or |

|  |  |  |                                          |                           |      |                     |                                                 |                                                                                                     |
|--|--|--|------------------------------------------|---------------------------|------|---------------------|-------------------------------------------------|-----------------------------------------------------------------------------------------------------|
|  |  |  | Resistance exercise                      | 718<br>(95% CI 422-1241)  | 620  | 1.14<br>(0.67-1.97) | 197 more per 1000 (from 198 less to 621 more)   | volume (frequency, duration, and intensity) and rate of progression of the physical activity [13] . |
|  |  |  | General physical activity (e.g. walking) | 1283<br>(95% CI 691-2369) | 1410 | 0.91<br>(0.49-1.68) | 127 fewer per 1000 (from 719 fewer to 959 more) |                                                                                                     |

|                        |                                                                                                                                                                             |                                                                                                                                                                                                                                                                                                                                                                                                                                                                                                                                                                                                                                                                                                                                                                                                                                                                                                                                                                                                                                                                                                 |                                                                                                                                                                                                                                                                                                                                         |                                                                                                                                                                                                                                                                                                                                                                                                                                                                                                                                                                                                                                                    |  |
|------------------------|-----------------------------------------------------------------------------------------------------------------------------------------------------------------------------|-------------------------------------------------------------------------------------------------------------------------------------------------------------------------------------------------------------------------------------------------------------------------------------------------------------------------------------------------------------------------------------------------------------------------------------------------------------------------------------------------------------------------------------------------------------------------------------------------------------------------------------------------------------------------------------------------------------------------------------------------------------------------------------------------------------------------------------------------------------------------------------------------------------------------------------------------------------------------------------------------------------------------------------------------------------------------------------------------|-----------------------------------------------------------------------------------------------------------------------------------------------------------------------------------------------------------------------------------------------------------------------------------------------------------------------------------------|----------------------------------------------------------------------------------------------------------------------------------------------------------------------------------------------------------------------------------------------------------------------------------------------------------------------------------------------------------------------------------------------------------------------------------------------------------------------------------------------------------------------------------------------------------------------------------------------------------------------------------------------------|--|
| Values and preferences | Is there similarity about how much patients, researchers, clinicians and stake holders value the main Outcomes? Also include adverse effects and burden of the intervention | <ul style="list-style-type: none"> <li>○ No</li> <li>○ Probably no</li> <li>● <b>Uncertain</b></li> <li>○ Probably yes</li> <li>○ Yes</li> <li>○ Varies</li> </ul>                                                                                                                                                                                                                                                                                                                                                                                                                                                                                                                                                                                                                                                                                                                                                                                                                                                                                                                              |                                                                                                                                                                                                                                                                                                                                         |                                                                                                                                                                                                                                                                                                                                                                                                                                                                                                                                                                                                                                                    |  |
| Resources              | <p>What is the certainty of the evidence of resources requirements (costs)?</p> <p>Does the cost effectiveness favour the intervention or the comparison?</p>               | <ul style="list-style-type: none"> <li>○ No studies</li> <li>○ Very low</li> <li>● <b>Low</b></li> <li>○ Moderate</li> <li>○ High</li> </ul> <ul style="list-style-type: none"> <li>○ Favours the option</li> <li>● <b>Probably favours the option</b></li> <li>○ Does not favour either</li> <li>○ Probably favours the comparison</li> <li>○ Favours the comparison</li> </ul> <p>Varies Trial-based economic analyses of exercise for fall prevention have used different methods and have had variable findings but several have found exercise for fall prevention to be cost-saving or to dominate (to be less costly and more effective) over control [8] [16].</p> <p>An update to the latest review conducted by our group (manuscript in preparation) have identified additional studies and a summary is provided below according to exercise type (results displayed in US 2020 \$):</p> <p>Balance and functional exercise (n=6 trail-based studies):<br/>Incremental cost-effectiveness ration (ICER) range from cost-saving (more effective and less costly) to \$3,339/fall</p> | <p>The annual cost of providing exercise programs found to be effective for fall prevention was estimated at between \$500 and \$1200 per person year (2009 AUD, details below) [15]. Our recent review (manuscript in preparation) found that the cost of exercise programs varied from \$0.40 to \$777 per week (2020 US dollars)</p> | <p>The average treatment cost per fall injury treated for older adults was \$3906 in Australia, and the cost ranged between \$369 for non-hospital treatments to \$18454 for hospital admission [18].</p> <p>Overall, more favorable ICERs were found in sub-group analysis conducted for older participants.</p> <p>More work is needed to understand the cost-effectiveness of different fall prevention programs in different populations and settings. Previous studies have used heterogeneous methods making comparison of results difficult. Trial-based analyses have involved relatively short follow-up periods and trials have been</p> |  |



|  |                                                                                                                                                                                                                                                                                                                                                                                                                                                                                                                                                                                                                                                                                                                                                                                                                                                                                            |                                                                                                                                                                                                                                                                                                                                                                                                                                                                                                                                                                                                                                                                                                                                                                                                                                                                        |
|--|--------------------------------------------------------------------------------------------------------------------------------------------------------------------------------------------------------------------------------------------------------------------------------------------------------------------------------------------------------------------------------------------------------------------------------------------------------------------------------------------------------------------------------------------------------------------------------------------------------------------------------------------------------------------------------------------------------------------------------------------------------------------------------------------------------------------------------------------------------------------------------------------|------------------------------------------------------------------------------------------------------------------------------------------------------------------------------------------------------------------------------------------------------------------------------------------------------------------------------------------------------------------------------------------------------------------------------------------------------------------------------------------------------------------------------------------------------------------------------------------------------------------------------------------------------------------------------------------------------------------------------------------------------------------------------------------------------------------------------------------------------------------------|
|  | <p>prevented; \$9,510/injurious fall prevented; \$130,938/QALY.</p> <p>Multi-component intervention (n=2 trial-based studies): ICER ranging from \$229 to \$897/fall prevented; \$648/injurious fall prevented; \$29,156/QALY gained</p> <p>Tai-Chi (n=3 trial-based studies): ICER ranging from cost-saving to \$3,847/fall prevented; \$38,170/QALY gained. A model-based analysis found an incremental cost-effectiveness ratio of AUD 28,931 per QALY gained from investing in fall prevention programs assuming a program cost of AUD 700 per person and at a fall prevention risk ratio of 0.75 [17]. Two-way sensitivity analysis found that using a threshold of AUD 50,000 per QALY gained programs would remain cost effective at a program cost of AUD 1000 and an effectiveness of 0.73 and that a program cost of \$1500 would be cost effective at a risk ratio of 0.57.</p> | <p>underpowered to detect effects on serious but rare outcomes such as hospitalization and residential care admission. Thus modelled analyses may be more useful to guide funding decisions. The cost health systems are willing to pay per fall prevented are yet to be established.</p> <p>As there are other health benefits associated with ongoing exercise, the other health benefits from exercise should also be considered.</p> <p>Additional information on the costs and return on investment for Otago, Tai Chi and falls management exercise (FaME) relevant to the UK context can be found in a document prepared by Public Health England [19]<br/> <a href="https://www.gov.uk/government/publications/falls-prevention-cost-effective-commissioning">https://www.gov.uk/government/publications/falls-prevention-cost-effective-commissioning</a></p> |
|--|--------------------------------------------------------------------------------------------------------------------------------------------------------------------------------------------------------------------------------------------------------------------------------------------------------------------------------------------------------------------------------------------------------------------------------------------------------------------------------------------------------------------------------------------------------------------------------------------------------------------------------------------------------------------------------------------------------------------------------------------------------------------------------------------------------------------------------------------------------------------------------------------|------------------------------------------------------------------------------------------------------------------------------------------------------------------------------------------------------------------------------------------------------------------------------------------------------------------------------------------------------------------------------------------------------------------------------------------------------------------------------------------------------------------------------------------------------------------------------------------------------------------------------------------------------------------------------------------------------------------------------------------------------------------------------------------------------------------------------------------------------------------------|

|               |                                               |                                                                                                                                                                                          |                                                                                                                                                                                                                                                                                                                                                                                                                                                                                                                                                                                                                                                                                                                                                                                                                                                                                                           |                                                                                                                                                                                                                                                                                                                                          |
|---------------|-----------------------------------------------|------------------------------------------------------------------------------------------------------------------------------------------------------------------------------------------|-----------------------------------------------------------------------------------------------------------------------------------------------------------------------------------------------------------------------------------------------------------------------------------------------------------------------------------------------------------------------------------------------------------------------------------------------------------------------------------------------------------------------------------------------------------------------------------------------------------------------------------------------------------------------------------------------------------------------------------------------------------------------------------------------------------------------------------------------------------------------------------------------------------|------------------------------------------------------------------------------------------------------------------------------------------------------------------------------------------------------------------------------------------------------------------------------------------------------------------------------------------|
| Equity        | What would be the impact on health equity?    | <ul style="list-style-type: none"> <li>○ Increased</li> <li>○ Probably increased</li> <li>○ Uncertain</li> <li>○ Probably reduced</li> <li>○ Reduced</li> <li>● <b>Varies</b></li> </ul> |                                                                                                                                                                                                                                                                                                                                                                                                                                                                                                                                                                                                                                                                                                                                                                                                                                                                                                           | Effects on equity are likely to vary. Program implementation could decrease inequities in settings with no-cost or low-cost access to health professionals or to falls prevention exercise programs. In other settings fall prevention exercise programs may only be available to those who can pay for them so inequity could increase. |
| Acceptability | Is the option acceptable to key stakeholders? | <ul style="list-style-type: none"> <li>○ No</li> <li>○ Probably no</li> <li>○ Uncertain</li> <li>○ Probably yes</li> <li>○ Yes</li> <li>● <b>Varies</b></li> </ul>                       | The acceptability of exercise programs to participants, providers and funders is likely to vary between individuals, programs and settings and is likely to be impacted by cultural values and beliefs [20]. Preference for type and location of exercise is likely to vary between individuals [15]. Barriers to participation in fall prevention exercise are likely to include practical aspects such as transport, access and cost and attitudes such as denial of fall risk and beliefs that no additional prevention measures are necessary [21, 22]. Older people may be motivated to participate in fall-related interventions by a wide range of perceived benefits including interest and enjoyment, improved health, mood and independence [21]. Important factors for promoting adherence may include, physician advice, health professional supervision and the quality of instructors [23]. |                                                                                                                                                                                                                                                                                                                                          |

|             |                                            |                                                                                                                                                                                                                                                                                                       |                                                                                                         |                                                                                                                                                                                                                         |
|-------------|--------------------------------------------|-------------------------------------------------------------------------------------------------------------------------------------------------------------------------------------------------------------------------------------------------------------------------------------------------------|---------------------------------------------------------------------------------------------------------|-------------------------------------------------------------------------------------------------------------------------------------------------------------------------------------------------------------------------|
| Feasibility | Is the intervention feasible to implement? | <ul style="list-style-type: none"> <li><input type="radio"/> No</li> <li><input type="radio"/> Probably no</li> <li><input type="radio"/> Uncertain</li> <li><input checked="" type="radio"/> <b>Probably yes</b></li> <li><input type="radio"/> Yes</li> <li><input type="radio"/> Varies</li> </ul> | Most trials of fall prevention interventions have involved implementation in “real-world” settings [8]. | It is assumed that the ability of health care systems to fund such programs will vary between countries and jurisdictions, dependent upon funding and staffing. Benefits of exercise are lost when programs are ceased. |
|-------------|--------------------------------------------|-------------------------------------------------------------------------------------------------------------------------------------------------------------------------------------------------------------------------------------------------------------------------------------------------------|---------------------------------------------------------------------------------------------------------|-------------------------------------------------------------------------------------------------------------------------------------------------------------------------------------------------------------------------|

**Should \_\_\_ be recommended for older adults to prevent and manage falls?**

| Type of recommendation        | Strong recommendation against the intervention<br><input type="radio"/>                                                                                                                                                                                                                                                                                                                                                                                                                                                                                                                                                                                                                                                                                                                                                                                                                                                                                                                                                                                                                              | Weak recommendation against the intervention<br><input type="radio"/> | Conditional recommendation for either the intervention or the comparison<br><input type="radio"/> | Weak recommendation for the intervention<br><input type="radio"/> | Strong recommendation for the intervention<br><input checked="" type="radio"/> |
|-------------------------------|------------------------------------------------------------------------------------------------------------------------------------------------------------------------------------------------------------------------------------------------------------------------------------------------------------------------------------------------------------------------------------------------------------------------------------------------------------------------------------------------------------------------------------------------------------------------------------------------------------------------------------------------------------------------------------------------------------------------------------------------------------------------------------------------------------------------------------------------------------------------------------------------------------------------------------------------------------------------------------------------------------------------------------------------------------------------------------------------------|-----------------------------------------------------------------------|---------------------------------------------------------------------------------------------------|-------------------------------------------------------------------|--------------------------------------------------------------------------------|
| Recommendation                | <p>Recommendation 1: We recommend exercise programmes for fall prevention for community-dwelling older adults that include balance challenging and functional exercises (e.g. sit-to-stand, stepping) should be offered with sessions three times or more weekly which are individualized, progressed in intensity for at least 12 weeks and continued longer for greater effect. GRADE: 1A</p> <p>Recommendation 2: We recommend inclusion, when feasible, of Tai Chi and/or additional individualized progressive resistance strength training. GRADE: 1B</p>                                                                                                                                                                                                                                                                                                                                                                                                                                                                                                                                      |                                                                       |                                                                                                   |                                                                   |                                                                                |
| Justification                 | <p>The strength of evidence for exercise in preventing falls in older people living in the community is high. This recommendation places a high value on preventing falls in the older population. The strong recommendation also takes into consideration the additional benefits of exercise, the minimal harms and strong cost-effectiveness. The three most convincing forms of exercise are those classified as balance and functional training, Tai Chi, or more than one type of exercise (usually balance and functional exercise plus resistance or aerobic training).</p>                                                                                                                                                                                                                                                                                                                                                                                                                                                                                                                  |                                                                       |                                                                                                   |                                                                   |                                                                                |
| Subgroup considerations       | <p>This recommendation applies to all older people regardless of their assessed risk of falling or age.</p>                                                                                                                                                                                                                                                                                                                                                                                                                                                                                                                                                                                                                                                                                                                                                                                                                                                                                                                                                                                          |                                                                       |                                                                                                   |                                                                   |                                                                                |
| Implementation considerations | <p>Effective programs</p> <ul style="list-style-type: none"> <li>• typically involve challenging exercises undertaken on three days per week for a total time of two hours per week</li> <li>• can be delivered by health/ exercise professionals or trained instructors</li> <li>• can be delivered in a group or taught as an individualised home exercise program</li> </ul> <p>People at higher risk of falling should undertake supervised exercise with trained providers to ensure safety and effectiveness of exercise. Benefits of exercise are lost when programs are ceased. To maximise the uptake of interventions and ongoing adherence to programs, older people should be encouraged to choose their preferred exercise type and setting. When implementing exercise programs for fall prevention, the overall cost and the cost-effectiveness of the programs vary depending on the primary type of exercise chosen, the use of equipment, the location of the program, the person delivering the exercise program and the frequency of follow up on participants’ progression.</p> |                                                                       |                                                                                                   |                                                                   |                                                                                |

|                           |                                                                                                                                                                                                                                                                                                                                                                                                                                                                                                                                                                         |
|---------------------------|-------------------------------------------------------------------------------------------------------------------------------------------------------------------------------------------------------------------------------------------------------------------------------------------------------------------------------------------------------------------------------------------------------------------------------------------------------------------------------------------------------------------------------------------------------------------------|
| Monitoring and evaluation | Falls and the amount and type of physical activity participation should be monitored through national surveys, clinical audits etc.                                                                                                                                                                                                                                                                                                                                                                                                                                     |
| Research Priorities       | Research gaps include a lack of trials investigating the effect on falls of strength training as a single intervention, walking programmes, recreational activities (e.g. yoga, dance) and sports. There is also insufficient evidence about the impact of exercise on fall-related injuries. There is also a need for studies investigating the effect of commencing participation in exercise in middle age on falls and fall-related injuries in older age. Trials need to be conducted in a range of countries with differing aged care systems and funding models. |

### Footnotes for summary of findings table

\*Exercise was classified based on the Prevention of Falls Network Europe (ProFaNE) taxonomy that classifies exercise type as: i) gait, balance, and functional training; ii) strength/ resistance (including power); iii) flexibility; iv) three- dimensional (3D) exercise (e.g. Tai Chi, Qigong, dance); v) general physical activity; vi) endurance; and vii) other kind of exercises. The taxonomy allows for more than one type of exercise to be delivered within a program.

<sup>§</sup> A control intervention is one that is not thought to reduce falls, such as general health education, social visits, very gentle exercise, or 'sham' exercise not expected to impact on falls.

<sup>a</sup>Using Prevention of Falls Network Europe (ProFaNE) taxonomy, gait, balance, and functional training is: gait training = specific correction of walking technique, and changes of pace, level and direction; balance training = transferring bodyweight from one part of the body to another or challenging specific aspects of the balance systems; functional training = functional activities, based on the concept of task specificity. Training is assessment-based, tailored and progressed. Exercise programs included in this analysis contained a single primary exercise category (gait, balance, and functional training); these exercise programs may also include secondary categories of exercise.

<sup>b</sup>Using ProFaNE taxonomy, resistance training is any type of weight training (contraction of muscles against resistance to induce a training effect in the muscular system). Resistance is applied by body weight or external resistance. Training is assessment-based, tailored and progressed. Exercise programs included in this analysis had resistance training as the single primary exercise category; these exercise programs may also include secondary categories of exercise.

<sup>c</sup>Using ProFaNE taxonomy, 3D (Tai Chi) training uses upright posture, specific weight transferences and movements of the head and gaze, during constant movement in a fluid, repetitive, controlled manner through three spatial planes. Exercise programs included in this analysis had 3D (Tai Chi) training as the single primary exercise category; these exercise programs may also include secondary categories of exercise.

<sup>d</sup>Using ProFaNE taxonomy, 3D (dance) training uses dynamic movement qualities, patterns and speeds whilst engaged in constant movement in a fluid, repetitive, controlled manner through three spatial planes. Exercise programs included in this analysis had 3D (dance) training as the single primary exercise category; these exercise programs may also include secondary categories of exercise.

<sup>e</sup>Using ProFaNE taxonomy, physical activity is any movement of the body, produced by skeletal muscle, that causes energy expenditure to be substantially increased. Recommendations regarding intensity, frequency and duration are required in order to increase performance. Exercise programs included in this analysis had general physical activity (including walking) training as the single primary exercise category; these exercise programs may also include secondary categories of exercise.

<sup>f</sup>Using ProFaNE taxonomy, exercise programs included in this analysis had more than one primary exercise category. We categorised exercise based on the Prevention of Falls Network Europe (ProFaNE) taxonomy that classifies exercise type as: i) gait, balance, and functional (task) training; ii) strength/ resistance (including power); iii) flexibility; iv) three-dimensional (3D) exercise (e.g. Tai Chi, Qigong, dance); v) general physical activity; vi) endurance; and vii) other kind of exercises. The programs of ten included, as the primary intervention, gait, balance, and functional (task) training plus resistance training. The exercise programs may also include secondary categories of exercise.

**Further program cost information [15]**

| <i>Annual cost</i>                                                                                                                                             | <i>Cost per person 2009 AUD</i> |                |                |
|----------------------------------------------------------------------------------------------------------------------------------------------------------------|---------------------------------|----------------|----------------|
| <b>One-year home-based exercise program delivered by district nurse (with the involvement of physiotherapists in exercise intervention) [15]</b>               |                                 |                |                |
| Training cost                                                                                                                                                  | \$49.88                         |                |                |
| Recruitment, program and prescription and follow up                                                                                                            | \$886.28                        |                |                |
| Program quality control supervision                                                                                                                            | \$154.36                        |                |                |
| <b>TOTAL</b>                                                                                                                                                   | <b>\$1090.52</b>                |                |                |
| <b>One-year home-based exercise program delivered by general practice-based nurse (with the involvement of physiotherapists in exercise intervention) [15]</b> |                                 |                |                |
| Training cost                                                                                                                                                  | \$22.07                         |                |                |
| Recruitment, program and prescription and follow up                                                                                                            | \$1016.15                       |                |                |
| Program quality control supervision                                                                                                                            | \$194.67                        |                |                |
| <b>TOTAL</b>                                                                                                                                                   | <b>\$1232.89</b>                |                |                |
| <b>15-week Tai Chi group program[15]</b>                                                                                                                       |                                 |                |                |
| Recruitment and coordination cost                                                                                                                              | \$102.30                        |                |                |
| Training cost that includes cost of instructor, venue hire, music license fees per class                                                                       | \$367.50                        |                |                |
| <b>TOTAL</b>                                                                                                                                                   | <b>\$469.80</b>                 |                |                |
| <i>Cost per person 2018 £</i>                                                                                                                                  |                                 |                |                |
| Cost of three exercise interventions in the United Kingdom                                                                                                     | Otago program [19]              | FaME [19]      | Tai Chi [19]   |
| Staff time                                                                                                                                                     | £345.40                         | £121.53        | £238.20        |
| Staff training                                                                                                                                                 | £1.72                           | £4.23          | £3.58          |
| Equipment/Facilities                                                                                                                                           | £23.18                          | £47.19         | £78.52         |
| Transport                                                                                                                                                      | £50.00                          | £37.51         | £36.76         |
| Evaluation cost                                                                                                                                                | £21.01                          | £10.52         | £17.85         |
| <b>TOTAL</b>                                                                                                                                                   | <b>£441.31</b>                  | <b>£220.98</b> | <b>£374.91</b> |

## References

1. Campbell AJ, Borrie MJ, Spears GF et al (1990) Circumstances and Consequences of Falls Experienced by a Community Population 70 Years and over during a Prospective Study. *Age and Ageing*. 19:136-141.
2. Tinetti ME, Speechley M, Ginter SF (1988) Risk Factors for Falls among Elderly Persons Living in the Community. *The New England Journal of Medicine*. 319:1701-1707.
3. World Health Organisation, *WHO Global Report on Falls Prevention in Older Age*. 2007: Geneva, Switzerland.
4. Kannus P, Niemi S, Parkkari J et al (2020) Sharp Rise in Fall-Induced Cervical Spine Injuries Among Older Adults Between 1970 and 2017. *The Journals of Gerontology. Series A, Biological Sciences and Medical Sciences*. 75:2015-2019.
5. Centers for Disease Control and Prevention, *Web-based Injury Statistics Query and Reporting System (WISQARS)*, U.S. Department of Health & Human Services, Editor. 2016.
6. Centers for Disease Control and Prevention. *Older adult fall prevention: Factors about falls*. 2021; Available from: <https://www.cdc.gov/homeandrecreationalafety/falls/adultfalls.html>.
7. Australian Institute of Health and Welfare and Flinders University, *Trends in hospitalised injury due to falls in older people 2007–08 to 2016–17*, Australian Institute of Health and Welfare, Editor. 2019: Canberra, ACT.
8. Sherrington C, Fairhall NJ, Wallbank GK et al (2019) Exercise for preventing falls in older people living in the community. *Cochrane library*. 2019.
9. Ng CACM, Fairhall N, Wallbank G et al (2019) Exercise for falls prevention in community-dwelling older adults: trial and participant characteristics, interventions and bias in clinical trials from a systematic review. *BMJ Open Sport & Exercise Medicine*. 5:e000663.
10. Sherrington C, Fairhall N, Kwok W et al (2020) Evidence on physical activity and falls prevention for people aged 65+ years: systematic review to inform the WHO guidelines on physical activity and sedentary behaviour. *International Journal of Behavioral Nutrition and Physical Activity*. 17:144.
11. Bull FC, Al-Ansari SS, Biddle S et al (2020) World Health Organization 2020 guidelines on physical activity and sedentary behaviour. *British Journal of Sports Medicine*. 54:1451.
12. Department of Health and Social Care, *Physical activity guidelines: UK Chief Medical Officer" report 2019*.
13. 2018 Physical Activity Guidelines Advisory Committee, *Physical Activity Guidelines Advisory Committee Scientific Report*. 2018: Washington, DC. .
14. Physical Activity Guidelines Advisory Committee, *Physical Activity Guidelines Advisory Committee Report, 2008*, U.S. Department of Health and Human Services, Editor. 2008: Washington, DC:.
15. Day L, Hoareau E, Finch C et al, *Modelling the impact, costs and benefits of falls prevention measures to support policy-makers and program planners*. 2009, Monash University Accident Research Centre.
16. Olij BF, Ophuis RH, Polinder S et al (2018) Economic Evaluations of Falls Prevention Programs for Older Adults: A Systematic Review. *J Am Geriatr Soc*. 66:2197-2204.
17. Farag I, Howard K, Ferreira ML et al (2015) Economic modelling of a public health programme for fall prevention. *Age and Ageing*. 44:409-414.
18. Centre for Population Health, *The Incidence and Cost of Falls Injury Among Older People in New South Wales 2006/07.*, NSW Department of Health, Editor. 2010: Sydney, New South Wales.
19. Public Health, England, *A Return on Investment Tool for the Assessment of Falls Prevention Programmes for Older People Living in the Community*. 2018, Public Health England: London UK.
20. Stevens JA, Sleet DA, Rubenstein LZ (2018) The Influence of Older Adults' Beliefs and Attitudes on Adopting Fall Prevention Behaviors. *American Journal of Lifestyle Medicine*. 12:324-330.
21. Yardley L, Bishop FL, Beyer N et al (2006) Older People's Views of Falls-Prevention Interventions in Six European Countries. *The Gerontologist*. 46:650-660.
22. Franco MR, Howard K, Sherrington C et al (2016) Smallest worthwhile effect of exercise programs to prevent falls among older people: estimates from benefit-harm trade-off and discrete choice methods. *Age and ageing*. 45:806-812.
23. Cohen-Mansfield J, Marx MS, Biddison JR et al (2004) Socio-environmental exercise preferences among older adults. *Preventive medicine*. 38:804-811.

## Recommendations for Working Group 4: Exercise and Falls

### Recommendation 3: We recommend individualized supervised exercise as a falls prevention strategy for adults living in long-term care settings. GRADE: 1B

|                       |                                                                                                                                                       |                                                                                                                         |
|-----------------------|-------------------------------------------------------------------------------------------------------------------------------------------------------|-------------------------------------------------------------------------------------------------------------------------|
| <b>Population:</b>    | Older people                                                                                                                                          | <b>Objective:</b> Should exercise versus usual care be used to reduce falls in older people living in residential care? |
| <b>Intervention:</b>  | Exercise (as a stand-alone intervention) as a falls prevention activity (trials recording falls as aEs excluded; whole body vibration alone excluded) |                                                                                                                         |
| <b>Comparison:</b>    | Usual Care                                                                                                                                            |                                                                                                                         |
| <b>Main outcomes:</b> | Falls                                                                                                                                                 |                                                                                                                         |
| <b>Setting:</b>       | Residential aged care                                                                                                                                 |                                                                                                                         |
| <b>Perspective:</b>   | International guidelines: residents, clinicians, aged care managers and policy makers                                                                 |                                                                                                                         |

| Decision Domain                |                            | Judgements                                                                                                                                                         | Research Evidence                                                                                                                                                                                                                                                                                                                                                                                                                                                                                                                                                                                                                                                                                                                    | Additional Considerations /Explanations |
|--------------------------------|----------------------------|--------------------------------------------------------------------------------------------------------------------------------------------------------------------|--------------------------------------------------------------------------------------------------------------------------------------------------------------------------------------------------------------------------------------------------------------------------------------------------------------------------------------------------------------------------------------------------------------------------------------------------------------------------------------------------------------------------------------------------------------------------------------------------------------------------------------------------------------------------------------------------------------------------------------|-----------------------------------------|
| <b>Priority of the Problem</b> | Is the problem a priority? | <ul style="list-style-type: none"> <li>○ No</li> <li>○ Probably no</li> <li>○ Uncertain</li> <li>○ Probably yes</li> <li>● <b>Yes</b></li> <li>○ Varies</li> </ul> | Estimates of the proportion of older people living in residential aged care varies between countries, partly due to differences in definition and measurement, but is likely to range between 6 and 16 percent of those aged 80 and over [1, 2]. Falls in residential aged care have are common and cause significant morbidity and mortality, due to fall-related injuries and fractures, including hip fracture. Falls incidence varies but a “middle of the road” figure is 1.7 falls per person-year compared with 0.65 falls per person year in the community. Falls can be as high as 2.5 falls per person-year [3]. With the ageing of the population, the public health impact and prevalence of this problem is increasing. |                                         |



|                                                 |                                                                                                                                              |                                                                                                                                                                                                                                                                                                         |                                                              |                            |                                          |                                                                                                                                                                                                                                                                                                                                                                                                                                                                                                                                                                                                                                                                                                 |
|-------------------------------------------------|----------------------------------------------------------------------------------------------------------------------------------------------|---------------------------------------------------------------------------------------------------------------------------------------------------------------------------------------------------------------------------------------------------------------------------------------------------------|--------------------------------------------------------------|----------------------------|------------------------------------------|-------------------------------------------------------------------------------------------------------------------------------------------------------------------------------------------------------------------------------------------------------------------------------------------------------------------------------------------------------------------------------------------------------------------------------------------------------------------------------------------------------------------------------------------------------------------------------------------------------------------------------------------------------------------------------------------------|
| Benefits and harms<br>(see below)               | Is there important uncertainty or variability in how much patients, researchers, clinicians and stake holders value the main outcomes?       | <ul style="list-style-type: none"> <li>○ Important uncertainty or variability</li> <li>○ Possibly important uncertainty or variability</li> <li>○ Probably no important uncertainty of variability</li> <li>● <b>No important uncertainty of variability</b></li> <li>○ No known undesirable</li> </ul> | <b>Relative importance of the main outcomes of interest:</b> |                            |                                          | Not formally assessed. It is assumed that most people place a high value on falls and fall-injury prevention.                                                                                                                                                                                                                                                                                                                                                                                                                                                                                                                                                                                   |
|                                                 |                                                                                                                                              |                                                                                                                                                                                                                                                                                                         | <b>Outcome</b>                                               | <b>Relative Importance</b> | <b>Certainty of the evidence (GRADE)</b> |                                                                                                                                                                                                                                                                                                                                                                                                                                                                                                                                                                                                                                                                                                 |
|                                                 |                                                                                                                                              |                                                                                                                                                                                                                                                                                                         | Rate of falls                                                | Critical                   | ⊕⊕⊕○<br>MODERATE                         | Based on a <b>range of benefits of exercise</b> , the World Health Organisation guidelines recommend that all older adults should undertake regular physical activity and that older adults should be as physically active as their functional ability allows, and adjust their level of effort for physical activity relative to their level of fitness (WHO physical activity guidelines) <sup>[4]</sup> .<br><br>Effective multifactorial strategies in aged care (Becker 2003 <sup>[5]</sup> ; Dyer 2004 <sup>[6]</sup> ) have included exercise with individualised combination exercise interventions plus environmental modifications and staff training (Cameron 2018) <sup>[3]</sup> . |
|                                                 |                                                                                                                                              |                                                                                                                                                                                                                                                                                                         | Risk of Fracture                                             | Critical                   | ⊕⊕○○<br>LOW                              |                                                                                                                                                                                                                                                                                                                                                                                                                                                                                                                                                                                                                                                                                                 |
|                                                 |                                                                                                                                              |                                                                                                                                                                                                                                                                                                         |                                                              |                            | ○○○○<br>MODERATE                         |                                                                                                                                                                                                                                                                                                                                                                                                                                                                                                                                                                                                                                                                                                 |
|                                                 |                                                                                                                                              |                                                                                                                                                                                                                                                                                                         |                                                              |                            | ○○○○<br>MODERATE                         |                                                                                                                                                                                                                                                                                                                                                                                                                                                                                                                                                                                                                                                                                                 |
|                                                 |                                                                                                                                              |                                                                                                                                                                                                                                                                                                         |                                                              |                            | ○○○○<br>MODERATE                         |                                                                                                                                                                                                                                                                                                                                                                                                                                                                                                                                                                                                                                                                                                 |
|                                                 |                                                                                                                                              |                                                                                                                                                                                                                                                                                                         |                                                              |                            | ○○○○<br>MODERATE                         |                                                                                                                                                                                                                                                                                                                                                                                                                                                                                                                                                                                                                                                                                                 |
|                                                 |                                                                                                                                              |                                                                                                                                                                                                                                                                                                         |                                                              |                            | ○○○○<br>MODERATE                         |                                                                                                                                                                                                                                                                                                                                                                                                                                                                                                                                                                                                                                                                                                 |
|                                                 |                                                                                                                                              |                                                                                                                                                                                                                                                                                                         |                                                              |                            | ○○○○<br>MODERATE                         |                                                                                                                                                                                                                                                                                                                                                                                                                                                                                                                                                                                                                                                                                                 |
| What is the overall certainty of this evidence? | <ul style="list-style-type: none"> <li>○ No studies</li> <li>○ Very low</li> <li>○ Low</li> <li>● <b>Moderate</b></li> <li>○ High</li> </ul> |                                                                                                                                                                                                                                                                                                         |                                                              |                            |                                          |                                                                                                                                                                                                                                                                                                                                                                                                                                                                                                                                                                                                                                                                                                 |

|                                                                                                              |                                                                                                                                                                                                                                                       |                                                                  |                                                      |                         |                                                                                                                                                                                                                                                                                                                                                                    |                                                                                                                                                                                                                                                            |                                 |
|--------------------------------------------------------------------------------------------------------------|-------------------------------------------------------------------------------------------------------------------------------------------------------------------------------------------------------------------------------------------------------|------------------------------------------------------------------|------------------------------------------------------|-------------------------|--------------------------------------------------------------------------------------------------------------------------------------------------------------------------------------------------------------------------------------------------------------------------------------------------------------------------------------------------------------------|------------------------------------------------------------------------------------------------------------------------------------------------------------------------------------------------------------------------------------------------------------|---------------------------------|
| How substantial are the desirable anticipated effects of the intervention?                                   | <ul style="list-style-type: none"> <li>• <b>Large</b></li> <li>○ Moderate</li> <li>○ Small</li> <li>○ Trivial</li> <li>○ Varies</li> <li>○ Don't know</li> </ul>                                                                                      | <b>Summary of findings (GRADE):</b>                              |                                                      |                         |                                                                                                                                                                                                                                                                                                                                                                    | <p>Whilst there is some uncertainty about the effectiveness of exercise when all trials in aged care are pooled; examining the rate of falls as measured at the end of the intervention period demonstrates that exercise significantly reduces falls.</p> |                                 |
| How substantial are the undesirable anticipated effects of the intervention?                                 | <ul style="list-style-type: none"> <li>• <b>Trivial</b></li> <li>○ Small</li> <li>○ Moderate</li> <li>○ Large</li> <li>○ Varies</li> <li>○ Don't know</li> </ul>                                                                                      | <b>Outcome</b><br><b>N<sub>o</sub> of participants (studies)</b> | <b>Anticipated absolute effect on falls (95% CI)</b> |                         |                                                                                                                                                                                                                                                                                                                                                                    |                                                                                                                                                                                                                                                            | <b>Effect</b>                   |
| Does the balance between desirable effects and undesirable effects favour the option of the comparison?      | <ul style="list-style-type: none"> <li>• <b>Favours the option</b></li> <li>○ Probably favours the option</li> <li>○ Does not favour either</li> <li>○ Probably favours the comparison</li> <li>○ Favours the comparison</li> <li>○ Varies</li> </ul> |                                                                  | <b>Usual Care</b>                                    | <b>Exercise</b>         | <b>Difference</b>                                                                                                                                                                                                                                                                                                                                                  |                                                                                                                                                                                                                                                            | <b>Relative effect (95% CI)</b> |
| Rate of falls<br>N <sub>o</sub> of participants: 1701<br>(13 studies)                                        | 2300/1000-person years                                                                                                                                                                                                                                | 1,587/1000py<br>(1,150-2,208/1000py)                             | 713/1000py<br>fewer<br>(1150 fewer to 92 more)       | RR: 0.69<br>(0.50-0.96) | <p><b>Adverse events:</b><br/>           In Cameron 2018 <sup>[3]</sup>, 9/16 trials reported on adverse events, there was 1 serious adverse event reported/1032 participants (very low evidence).<sup>1</sup> No serious adverse events were reported in the additional 4 trials (642 participants) reporting adverse events contributing data in the update.</p> |                                                                                                                                                                                                                                                            |                                 |
| Number of people sustaining a fracture-all fractures<br>N <sub>o</sub> of participants: 407<br>(2 studies)   | 42/1000 people (4.2%)                                                                                                                                                                                                                                 | 37/1000 people (14-92/1000)                                      | 5 fewer per 1000<br>(28 fewer to 50 more)            | RR: 0.87<br>(0.34-2.20) |                                                                                                                                                                                                                                                                                                                                                                    |                                                                                                                                                                                                                                                            |                                 |
| Number of people sustaining a fracture – hip fractures<br>N <sub>o</sub> of participants: 186<br>(1 studies) | 23/1000 persons/year (2.3%)                                                                                                                                                                                                                           | 12/1000 people (1-120/1000)                                      | 11 fewer per 1000<br>(22 fewer to 97 more)           | RR: 0.50<br>(0.05-5.20) |                                                                                                                                                                                                                                                                                                                                                                    |                                                                                                                                                                                                                                                            |                                 |

|                                                                                                    |                                                                                                                                                                                    |                                                                                                                                                                    |                                                                                                                                                                                                                                                                                                                                                                                                                                                                                                                                                                                                                                                                                                                                                                                                                                                                                                                                                                                                                                                                                                                                                                                                                                                                                                                                                                                                                                                                                                                                                                                                                                                                                                    |                                                                                                                                                                                                                                                                                                                                                      |
|----------------------------------------------------------------------------------------------------|------------------------------------------------------------------------------------------------------------------------------------------------------------------------------------|--------------------------------------------------------------------------------------------------------------------------------------------------------------------|----------------------------------------------------------------------------------------------------------------------------------------------------------------------------------------------------------------------------------------------------------------------------------------------------------------------------------------------------------------------------------------------------------------------------------------------------------------------------------------------------------------------------------------------------------------------------------------------------------------------------------------------------------------------------------------------------------------------------------------------------------------------------------------------------------------------------------------------------------------------------------------------------------------------------------------------------------------------------------------------------------------------------------------------------------------------------------------------------------------------------------------------------------------------------------------------------------------------------------------------------------------------------------------------------------------------------------------------------------------------------------------------------------------------------------------------------------------------------------------------------------------------------------------------------------------------------------------------------------------------------------------------------------------------------------------------------|------------------------------------------------------------------------------------------------------------------------------------------------------------------------------------------------------------------------------------------------------------------------------------------------------------------------------------------------------|
| <p style="writing-mode: vertical-rl; transform: rotate(180deg);"><b>Values and preferences</b></p> | <p>Is there similarity about how much patients, researchers, clinicians and stake holders value the main Outcomes? Also include adverse effects and burden of the intervention</p> | <ul style="list-style-type: none"> <li>○ No</li> <li>○ Probably no</li> <li>● <b>Uncertain</b></li> <li>○ Probably yes</li> <li>○ Yes</li> <li>○ Varies</li> </ul> | <p>Adverse Events: 1 serious adverse event reported (death due to a ruptured abdominal aortic aneurysm one week after the follow-up tests, association could not definitely be ruled out) in 1 trial (183 participants)</p> <p>Three trials reported no differences in adverse events:</p> <ul style="list-style-type: none"> <li>● 1 trial (639 participants) reporting aches and pains, P=0.75</li> <li>● 1 trial (194 participants) reported no statistical difference in severe soreness (10 exercise versus 11 control), severe bruises (2 versus 1), severe fatigue (4 versus 1)</li> <li>● 1 trial reported no adverse events</li> </ul>                                                                                                                                                                                                                                                                                                                                                                                                                                                                                                                                                                                                                                                                                                                                                                                                                                                                                                                                                                                                                                                    |                                                                                                                                                                                                                                                                                                                                                      |
| <p style="writing-mode: vertical-rl; transform: rotate(180deg);"><b>Resources</b></p>              | <p>What is the certainty of the evidence of resources requirements (costs)?</p>                                                                                                    | <ul style="list-style-type: none"> <li>○ No studies</li> <li>○ Very low</li> <li>● <b>Low</b></li> <li>○ Moderate</li> <li>○ High</li> </ul>                       | <p>Most trials do not report resource use or costs. Cameron 20181 reported 2 older studies that included exercise interventions and evaluated costs of interventions.</p> <ul style="list-style-type: none"> <li>● Buettner (2002) reported lower healthcare service costs for an intervention group receiving daily walking plus a 3x weekly exercise for function program and a sensory air mat 2x weekly in comparison to usual care (\$30, 031 USD vs \$79, 535 USD). This study stated that falls were reduced but the effect estimate was not reported [7].</li> <li>● Mulrow (1994) reported an average intervention cost of \$USD 1,220 (95%CI \$412 to \$1832) vs \$189 (95%CI \$80 to \$298) for a 1:1 physical therapy program 3x weekly over 4 months vs. friendly visits control per person. The intervention in this study did not reduce falls, healthcare costs were \$USD 11,398 (95% CI \$10,929 to \$11,849) (control costs NR, not significantly different).</li> </ul> <p>More recently, Hewitt (2019) [8] reported costs of an effective combination exercise program with individually prescribed progressive resistance training plus balance exercise in a group setting delivered over 6 months as \$AUD 463 per participant. The costs included the initial purchase of gymnasium equipment (\$AU 60,000) and servicing (\$264 per participant). However, the equipment was transported and shared between facilities which is likely to underestimate the true cost to a single facility implementing the program. In addition, the analysed costs include a single staff activities officer however 2 activities officers and physiotherapist attendance once per</p> | <p>Intervention costs for an effective intervention are not clearly reported. The intervention costs per person are likely to be relatively small compared to the cost of residential care and may save healthcare costs overall. The implementation cost at a national level may be significant due to a potentially large eligible population.</p> |

|  |                                                                        |                                                                                                                                                                                                                                                       |                                                                                                                                                                                                                                                                                                                                                                                                                                                                                                                                                                                                                                                                                                                                                                                                                                                                                                                                                                    |                                                                                                                                                                                                                                                                                       |
|--|------------------------------------------------------------------------|-------------------------------------------------------------------------------------------------------------------------------------------------------------------------------------------------------------------------------------------------------|--------------------------------------------------------------------------------------------------------------------------------------------------------------------------------------------------------------------------------------------------------------------------------------------------------------------------------------------------------------------------------------------------------------------------------------------------------------------------------------------------------------------------------------------------------------------------------------------------------------------------------------------------------------------------------------------------------------------------------------------------------------------------------------------------------------------------------------------------------------------------------------------------------------------------------------------------------------------|---------------------------------------------------------------------------------------------------------------------------------------------------------------------------------------------------------------------------------------------------------------------------------------|
|  |                                                                        |                                                                                                                                                                                                                                                       | fortnight are recommended for program delivery.<br>Two small effective trials have used less resource intensive interventions: Jahanpeyma (2021) [9] tested the Otago program which utilises ankle weights and Irez (2011) [10] intervention used resistance bands, mats and exercise balls.                                                                                                                                                                                                                                                                                                                                                                                                                                                                                                                                                                                                                                                                       |                                                                                                                                                                                                                                                                                       |
|  | Does the cost effectiveness favour the intervention or the comparison? | <ul style="list-style-type: none"> <li>○ Favours the option</li> <li>● <b>Probably favours the option</b></li> <li>○ Does not favour either</li> <li>○ Probably favours the comparison</li> <li>○ Favours the comparison</li> <li>○ Varies</li> </ul> | <p>Most trials do not report cost-effectiveness analysis.</p> <p>The effective combination exercise program with individually prescribed progressive resistance training plus balance exercise in a group setting delivered over 6 months in Hewitt (2019) was cost-effective with a (bootstrapped) cost-effectiveness ratio of \$18 per fall per person avoided (95% CI -\$380.34 to \$417.85) [8]. This analysis included costs of equipment purchasing shared between participants, which is likely to be more favourable than the experience of a single aged care facility implementing the program.</p> <p>Scenario analysis indicated that the exercise program was dominant (ie both more effective and less costly), with a cost saving of \$333 per fall avoided in subsequent years, however this analysis did not capture the upfront equipment costs and assumed that the gym equipment had already been purchased and the programme implemented.</p> | <p>True implementation costs in Hewitt (2018) may be underestimated.</p> <p>No cost-effectiveness analysis was conducted for Jahanpeyma (2021) <sup>[9]</sup> or Irez (2011) <sup>[10]</sup>; these programs may be less costly but evidence for effectiveness is highly limited.</p> |

|               |                                               |                                                                                                                                                                                          |                                                                                                                                                                                                                                                                                                                                                                                                                                                                                                                           |                                                                                                                                                                                                                                                                                                                                                                                                                                                                                                            |
|---------------|-----------------------------------------------|------------------------------------------------------------------------------------------------------------------------------------------------------------------------------------------|---------------------------------------------------------------------------------------------------------------------------------------------------------------------------------------------------------------------------------------------------------------------------------------------------------------------------------------------------------------------------------------------------------------------------------------------------------------------------------------------------------------------------|------------------------------------------------------------------------------------------------------------------------------------------------------------------------------------------------------------------------------------------------------------------------------------------------------------------------------------------------------------------------------------------------------------------------------------------------------------------------------------------------------------|
| Equity        | What would be the impact on health equity?    | <ul style="list-style-type: none"> <li>○ Increased</li> <li>○ Probably increased</li> <li>○ Uncertain</li> <li>○ Probably reduced</li> <li>○ Reduced</li> <li>● <b>Varies</b></li> </ul> |                                                                                                                                                                                                                                                                                                                                                                                                                                                                                                                           | It is assumed that effects on equity are likely to vary. In systems where access is possible through public funding it may decrease inequities by improving falls outcomes in residents that have not previously had appropriate access to effective interventions. In jurisdictions where public funding to deliver the intervention cannot be accessed, and funding is required, implementation may be greater in facilities with higher levels of private funding/staffing and inequities may increase. |
| Acceptability | Is the option acceptable to key stakeholders? | <ul style="list-style-type: none"> <li>○ No</li> <li>○ Probably no</li> <li>○ Uncertain</li> <li>○ Probably yes</li> <li>○ Yes</li> <li>● <b>Varies</b></li> </ul>                       | The intervention arm of Hewitt (2018) recruited 26% (113/439) of eligible participants <sup>[11]</sup> . Whilst recruitment to trials may differ from participation in a program, this is likely to indicate a lack of universal acceptability. Attendance in this trial ranged from 81% to 56% of sessions in the first 25 weeks of individually prescribed exercise supervised by a physiotherapist but during the “maintenance phase” which was supervised by facility staff or volunteers was 51% to 31% of sessions. | It is assumed that the acceptability of an exercise program will vary between different residents, programs and settings.                                                                                                                                                                                                                                                                                                                                                                                  |

|             |                                            |                                                                                                                                                                    |  |                                                                                                                                                                                   |
|-------------|--------------------------------------------|--------------------------------------------------------------------------------------------------------------------------------------------------------------------|--|-----------------------------------------------------------------------------------------------------------------------------------------------------------------------------------|
| Feasibility | Is the intervention feasible to implement? | <ul style="list-style-type: none"> <li>○ No</li> <li>○ Probably no</li> <li>○ Uncertain</li> <li>○ Probably yes</li> <li>○ Yes</li> <li>● <b>Varies</b></li> </ul> |  | It is assumed that the ability of aged care providers to fund such programs will vary between countries and jurisdictions, dependent upon aged care funding systems and staffing. |
|-------------|--------------------------------------------|--------------------------------------------------------------------------------------------------------------------------------------------------------------------|--|-----------------------------------------------------------------------------------------------------------------------------------------------------------------------------------|

**Should \_\_\_ be recommended for older adults to prevent and manage falls?**

| Type of recommendation        | Strong recommendation against the intervention<br>○                                                                                                                                                                                                                                                                                                                                                                                                                                                                                                                                                                                                                                                                                                                                                                                                                                                                                                                                                                                                                                                                                                                                                   | Weak recommendation against the intervention<br>○ | Conditional recommendation for either the intervention or the comparison<br>○ | Weak recommendation for the intervention<br>● | Strong recommendation for the intervention<br>○ |
|-------------------------------|-------------------------------------------------------------------------------------------------------------------------------------------------------------------------------------------------------------------------------------------------------------------------------------------------------------------------------------------------------------------------------------------------------------------------------------------------------------------------------------------------------------------------------------------------------------------------------------------------------------------------------------------------------------------------------------------------------------------------------------------------------------------------------------------------------------------------------------------------------------------------------------------------------------------------------------------------------------------------------------------------------------------------------------------------------------------------------------------------------------------------------------------------------------------------------------------------------|---------------------------------------------------|-------------------------------------------------------------------------------|-----------------------------------------------|-------------------------------------------------|
| Recommendation                | Recommendation 3: We recommend individualized supervised exercise as a falls prevention strategy for adults living in long-term care settings. GRADE: 1B                                                                                                                                                                                                                                                                                                                                                                                                                                                                                                                                                                                                                                                                                                                                                                                                                                                                                                                                                                                                                                              |                                                   |                                                                               |                                               |                                                 |
| Justification                 | <p>The strength of evidence for exercise alone in preventing falls in older people living in residential care when measured at the end of the intervention period is moderate. This recommendation places a relatively high value on preventing falls in this population. This evidence plus additional benefits of exercise (see World Health Organisation guidelines <sup>[4]</sup> and evidence from exercise as a component of effective multifactorial strategies in aged care (Cameron 2018) <sup>[3]</sup>), minimal harms and likely cost-effectiveness contribute to the justification for a conditional positive recommendation.</p> <p>In terms of individual trials, the most convincing evidence for exercise for falls prevention in this population comes from Hewitt (2018) <sup>[12]</sup>, thus the exercise program in this trial plus a sensitivity analysis excluding a single trial with a poor exercise intervention, a subgroup analysis by exercise type and the effective multifactorial trials in Cameron (2018) <sup>[3]</sup> inform the practice points.</p>                                                                                                            |                                                   |                                                                               |                                               |                                                 |
| Subgroup considerations       | None, due to a lack of evidence. Whilst a subgroup analysis on type of exercise shows significant subgroup differences, this did not provide clearer guidance on the conditions needed for effective exercise interventions in aged care due to minimal numbers of trials in some subgroups and remaining high heterogeneity in others. Additional well conducted and clearly reported trials are required to further inform these considerations                                                                                                                                                                                                                                                                                                                                                                                                                                                                                                                                                                                                                                                                                                                                                     |                                                   |                                                                               |                                               |                                                 |
| Implementation considerations | <p>The cost-effectiveness of any program is strongly influenced by the effectiveness of the program. Whilst Hewitt (2018) was an effective program, the equipment purchase cost was \$AUD 60,000 (2015 costs) and the most effective initial 25-week phase included supervision by a physiotherapist. The cost-effectiveness analysis included a single activities officer although it is recommended implementing the program with a physiotherapist attendance once per fortnight and two trained activities officers for all other sessions<sup>[8]</sup>. Feasibility accounting for costs of staffing and equipment and staff availability need to be considered. Individual preferences of residents are likely to play a role in acceptability.</p> <p>Two other smaller trials (Irez (2011) <sup>[10]</sup> and Jahanpeyma (2021) <sup>[9]</sup> tested interventions that are likely to be less resource intensive (utilising resistance bands, mats and exercise balls <sup>[10]</sup> and ankle weights <sup>[9]</sup>) and may be less costly, although the evidence for the effectiveness of these interventions is highly limited and the cost-effectiveness has not been examined.</p> |                                                   |                                                                               |                                               |                                                 |

|                           |                                                                                                                                                                                                                                                                                                                                                                                                                                                                                                                                                                                                                                                                                                                                                                                                                                      |
|---------------------------|--------------------------------------------------------------------------------------------------------------------------------------------------------------------------------------------------------------------------------------------------------------------------------------------------------------------------------------------------------------------------------------------------------------------------------------------------------------------------------------------------------------------------------------------------------------------------------------------------------------------------------------------------------------------------------------------------------------------------------------------------------------------------------------------------------------------------------------|
| Monitoring and evaluation | Falls rates in aged care facilities are highly variable. Falls and fall-related injuries should be continuously monitored and evaluated over time with appropriate statistical techniques. The amount and type of physical activity undertaken should also be monitored.                                                                                                                                                                                                                                                                                                                                                                                                                                                                                                                                                             |
| Research Priorities       | The certainty of the evidence supporting the benefits of exercise in older people living in residential care is moderate but there remains a lack of trials to inform the type of exercise program that is most beneficial. Additional trials of a sample size powered to detect a reduction in falls, reporting all appropriate falls outcomes (rate of falls, risk of falls and injurious falls), with cost-effectiveness analyses and clearly describing the intervention and comparison components, setting and characteristics, enrolled participants (e.g. proportion of participants with cognitive impairment and its severity) and qualifications of the person delivering the exercise intervention are required. Trials need to be conducted in a range of countries with differing aged care systems and funding models. |

### References

1. Dyer SM, Tilden D (2021) Is Australia over-reliant on residential aged care to support our older population? *Med J Aust.* 215:46-46.e1.
2. Gibson DM (2021) Is Australia over-reliant on residential aged care to support our older population? *Med J Aust.* 215:45-45.e1.
3. Cameron ID, Dyer SM, Panagoda CE et al (2018) Interventions for preventing falls in older people in care facilities and hospitals. *Cochrane Database Syst Rev.* 9:Cd005465.
4. World Health Organisation, *WHO guidelines on physical activity and sedentary behaviour.* 2020, World Health Organisation,; Geneva.
5. Becker C, Kron M, Lindemann U et al (2003) Effectiveness of a multifaceted intervention on falls in nursing home residents. *Journal of the American Geriatrics Society.* 51:306-313.
6. Dyer CA, Taylor GJ, Reed M et al (2004) Falls prevention in residential care homes: a randomised controlled trial. *Age and Ageing.* 33:596-602.
7. Buettner LL (2002) Focus on caregiving. Falls prevention in dementia populations. *Provider.* 28:41-43.
8. Hewitt J, Saing S, Goodall S et al (2019) An economic evaluation of the SUNBEAM programme: a falls-prevention randomized controlled trial in residential aged care. *Clinical Rehabilitation.* 33:524-534.
9. Jahanpeyma P, Kayhan Koçak F, Yıldırım Y et al (2021) Effects of the Otago exercise program on falls, balance, and physical performance in older nursing home residents with high fall risk: a randomized controlled trial. *Eur Geriatr Med.* 12:107-115.
10. Irez GB, Ozdemir RA, Evin R et al (2011) Integrating pilates exercise into an exercise program for 65+ year-old women to reduce falls. *Journal of Sports Science & Medicine.* 10:105-111.
11. Hewitt J, Refshauge KM, Goodall S et al (2014) Does progressive resistance and balance exercise reduce falls in residential aged care? Randomized controlled trial protocol for the SUNBEAM program. *Clinical Interventions In Aging.* 9:369-376.
12. Hewitt J, Goodall S, Clemson L et al (2018) Progressive Resistance and Balance Training for Falls Prevention in Long-Term Residential Aged Care: A Cluster Randomized Trial of the Sunbeam Program. *Journal of the American Medical Directors Association.* 19:361-369.

## Recommendations for Working Group 4: Exercise and Falls

**Recommendation 4: We recommend that adults with Parkinson’s Disease at an early to mid-stage and with mild or no cognitive impairment are offered individualized exercise programmes including balance and resistant training exercise. GRADE: 1A**

| <b>Population:</b>      | People with Parkinson’s Disease                                                                                                          | <b>Objective:</b> <i>Should exercise versus no exercise be used to reduce falls in people with Parkinson’s disease?</i>                                                                                                                                                                                                                                                                                                                       |                                                                                                                                                                                                                                                                                                                                                                                                                                                                                                                                                                                                                                                                            |                                                                                                                                                                                                                                                                                                                                      |
|-------------------------|------------------------------------------------------------------------------------------------------------------------------------------|-----------------------------------------------------------------------------------------------------------------------------------------------------------------------------------------------------------------------------------------------------------------------------------------------------------------------------------------------------------------------------------------------------------------------------------------------|----------------------------------------------------------------------------------------------------------------------------------------------------------------------------------------------------------------------------------------------------------------------------------------------------------------------------------------------------------------------------------------------------------------------------------------------------------------------------------------------------------------------------------------------------------------------------------------------------------------------------------------------------------------------------|--------------------------------------------------------------------------------------------------------------------------------------------------------------------------------------------------------------------------------------------------------------------------------------------------------------------------------------|
| <b>Intervention:</b>    | Exercise (as a stand-alone intervention) designed as a falls prevention activity (ie, trials recording falls as adverse events excluded) | <b>Background:</b><br>Parkinson’s disease (PD) is a common neurodegenerative disorder. It is estimated that over 10 million people worldwide have PD, and this number is projected to grow exponentially over the next 20 years [1]. People with PD fall twice as often as people in the general older population, with some individuals falling multiple times per day [2]. These falls are costly to individuals and the healthcare system. |                                                                                                                                                                                                                                                                                                                                                                                                                                                                                                                                                                                                                                                                            |                                                                                                                                                                                                                                                                                                                                      |
| <b>Comparison:</b>      | Usual care or a non-active intervention                                                                                                  |                                                                                                                                                                                                                                                                                                                                                                                                                                               |                                                                                                                                                                                                                                                                                                                                                                                                                                                                                                                                                                                                                                                                            |                                                                                                                                                                                                                                                                                                                                      |
| <b>Main outcomes:</b>   | Falls                                                                                                                                    |                                                                                                                                                                                                                                                                                                                                                                                                                                               |                                                                                                                                                                                                                                                                                                                                                                                                                                                                                                                                                                                                                                                                            |                                                                                                                                                                                                                                                                                                                                      |
| <b>Setting:</b>         | All                                                                                                                                      |                                                                                                                                                                                                                                                                                                                                                                                                                                               |                                                                                                                                                                                                                                                                                                                                                                                                                                                                                                                                                                                                                                                                            |                                                                                                                                                                                                                                                                                                                                      |
| <b>Perspective:</b>     | International guidelines, community, residents, clinicians and policy makers                                                             |                                                                                                                                                                                                                                                                                                                                                                                                                                               |                                                                                                                                                                                                                                                                                                                                                                                                                                                                                                                                                                                                                                                                            |                                                                                                                                                                                                                                                                                                                                      |
| Decision Domain         |                                                                                                                                          | Judgements                                                                                                                                                                                                                                                                                                                                                                                                                                    | Research Evidence                                                                                                                                                                                                                                                                                                                                                                                                                                                                                                                                                                                                                                                          | Additional Considerations /Explanations                                                                                                                                                                                                                                                                                              |
| Priority of the Problem | Is the problem a priority?                                                                                                               | <ul style="list-style-type: none"> <li>○ No</li> <li>○ Probably no</li> <li>○ Uncertain</li> <li>○ Probably yes</li> <li>● <b>Yes</b></li> <li>○ Varies</li> </ul>                                                                                                                                                                                                                                                                            | <p>Around 60% of people with PD fall each year, and around 66% of these fall recurrently [2]. This is twice the rate of falls in the general older population [3]. Consequently, people with PD have an increased rate of injury, including a rate of hip fracture that is two [4] to four times greater [5] than people of the same age without PD. Falls are costly to the individual and the healthcare system and are a leading cause of reduced quality of life for the person with PD [6], caregiver burden [7]. and institutionalisation [8]. With the number of people with PD increasing rapidly [1], the public health impact of this problem is increasing.</p> | <p>Falls are costly to the individual and the healthcare system [9, 10]. Falls are associated with reduced quality of life [6], care giver burden [7] and nursing home admission [8]. There is evidence that many people with PD are fearful of falling and modify their activities to try to reduce their risk of falling [11].</p> |
|                         |                                                                                                                                          |                                                                                                                                                                                                                                                                                                                                                                                                                                               |                                                                                                                                                                                                                                                                                                                                                                                                                                                                                                                                                                                                                                                                            |                                                                                                                                                                                                                                                                                                                                      |



|                                          |                                                                                                                                        |                                                                                                                                                                                                                                                                                                                                                                                                                                                                                                                                                                            |                                                              |                     |                                   |                                                                                                                                                                                                                                                                                                                                                                                                                                                                                                                                                                                                                                                                                                                                                                                                                                                                                         |
|------------------------------------------|----------------------------------------------------------------------------------------------------------------------------------------|----------------------------------------------------------------------------------------------------------------------------------------------------------------------------------------------------------------------------------------------------------------------------------------------------------------------------------------------------------------------------------------------------------------------------------------------------------------------------------------------------------------------------------------------------------------------------|--------------------------------------------------------------|---------------------|-----------------------------------|-----------------------------------------------------------------------------------------------------------------------------------------------------------------------------------------------------------------------------------------------------------------------------------------------------------------------------------------------------------------------------------------------------------------------------------------------------------------------------------------------------------------------------------------------------------------------------------------------------------------------------------------------------------------------------------------------------------------------------------------------------------------------------------------------------------------------------------------------------------------------------------------|
| <b>Benefits and harms</b><br>(see below) | Is there important uncertainty or variability in how much patients, researchers, clinicians and stake holders value the main outcomes? | <ul style="list-style-type: none"> <li>○ Important uncertainty or variability</li> <li>○ Possibly important uncertainty or variability</li> <li>○ Probably no important uncertainty of variability</li> <li>● <b>No important uncertainty of variability</b></li> <li>○ No known undesirable</li> </ul>                                                                                                                                                                                                                                                                    | <b>Relative importance of the main outcomes of interest:</b> |                     |                                   | <p>Not formally assessed. It is assumed that most people with PD place a high value on falls and fall-injury prevention.</p> <p>A 25% reduction in fall rates in people with PD has been reported to be the minimum clinically important difference from a Delphi study [16].</p> <p>While there is little evidence about the efficacy of exercise for people with more advanced disease, there is some evidence that it may be beneficial in improving mobility and balance [17].</p> <p>Based on a range of benefits of exercise, the World Health Organisation guidelines recommend that all older adults should undertake regular physical activity and that older adults should be as physically active as their functional ability allows, and adjust their level of effort for physical activity relative to their level of fitness (WHO physical activity guidelines) [18].</p> |
|                                          | What is the overall certainty of this evidence?                                                                                        | <p>Mild to moderate PD with good cognition</p> <ul style="list-style-type: none"> <li>○ No studies</li> <li>○ Very low</li> <li>○ Low</li> <li>○ Moderate</li> <li>● <b>High</b></li> </ul> <p>Advanced PD</p> <ul style="list-style-type: none"> <li>○ No studies</li> <li>○ Very low</li> <li>● <b>Low</b></li> <li>○ Moderate</li> <li>○ High</li> </ul> <p>There is very low certainty evidence that exercise increases falls compared to control in people with more advanced disease, but there are no studies in people with impaired cognition (MMSE &lt; 24).</p> | Outcome                                                      | Relative Importance | Certainty of the evidence (GRADE) |                                                                                                                                                                                                                                                                                                                                                                                                                                                                                                                                                                                                                                                                                                                                                                                                                                                                                         |
|                                          |                                                                                                                                        |                                                                                                                                                                                                                                                                                                                                                                                                                                                                                                                                                                            | Rate of falls                                                | Critical            | ⊕⊕⊕○<br>MODERATE                  |                                                                                                                                                                                                                                                                                                                                                                                                                                                                                                                                                                                                                                                                                                                                                                                                                                                                                         |
|                                          |                                                                                                                                        |                                                                                                                                                                                                                                                                                                                                                                                                                                                                                                                                                                            |                                                              |                     | ○○○○<br>MODERATE                  |                                                                                                                                                                                                                                                                                                                                                                                                                                                                                                                                                                                                                                                                                                                                                                                                                                                                                         |
|                                          |                                                                                                                                        |                                                                                                                                                                                                                                                                                                                                                                                                                                                                                                                                                                            |                                                              |                     | ○○○○<br>MODERATE                  |                                                                                                                                                                                                                                                                                                                                                                                                                                                                                                                                                                                                                                                                                                                                                                                                                                                                                         |
|                                          |                                                                                                                                        |                                                                                                                                                                                                                                                                                                                                                                                                                                                                                                                                                                            |                                                              |                     | ○○○○<br>MODERATE                  |                                                                                                                                                                                                                                                                                                                                                                                                                                                                                                                                                                                                                                                                                                                                                                                                                                                                                         |
|                                          |                                                                                                                                        |                                                                                                                                                                                                                                                                                                                                                                                                                                                                                                                                                                            |                                                              |                     | ○○○○<br>MODERATE                  |                                                                                                                                                                                                                                                                                                                                                                                                                                                                                                                                                                                                                                                                                                                                                                                                                                                                                         |
|                                          |                                                                                                                                        |                                                                                                                                                                                                                                                                                                                                                                                                                                                                                                                                                                            |                                                              |                     | ○○○○<br>MODERATE                  |                                                                                                                                                                                                                                                                                                                                                                                                                                                                                                                                                                                                                                                                                                                                                                                                                                                                                         |
|                                          |                                                                                                                                        |                                                                                                                                                                                                                                                                                                                                                                                                                                                                                                                                                                            |                                                              |                     | ○○○○<br>MODERATE                  |                                                                                                                                                                                                                                                                                                                                                                                                                                                                                                                                                                                                                                                                                                                                                                                                                                                                                         |
|                                          |                                                                                                                                        |                                                                                                                                                                                                                                                                                                                                                                                                                                                                                                                                                                            |                                                              |                     | ○○○○<br>MODERATE                  |                                                                                                                                                                                                                                                                                                                                                                                                                                                                                                                                                                                                                                                                                                                                                                                                                                                                                         |

| <p>How substantial are the desirable anticipated effects of the intervention?</p>                              | <p>Mild to moderate PD with good cognition</p> <ul style="list-style-type: none"> <li>• <b>Large</b> <ul style="list-style-type: none"> <li>○ Moderate</li> <li>○ Small</li> <li>○ Trivial</li> <li>○ Varies</li> <li>○ Don't know</li> </ul> </li> </ul> <p>Advanced PD</p> <ul style="list-style-type: none"> <li>○ Large</li> <li>○ Moderate</li> <li>○ Small</li> <li>○ Trivial</li> <li>○ Varies</li> <li>• <b>Don't know</b></li> </ul>                                           | <p><b>Summary of findings (GRADE):</b></p> <table border="1" data-bbox="842 228 1654 678"> <thead> <tr> <th rowspan="2">Outcome</th> <th colspan="2">№ of patients</th> <th>Effect</th> </tr> <tr> <th>Intervention</th> <th>Control</th> <th>Relative / Absolute (95% CI)</th> </tr> </thead> <tbody> <tr> <td>Rate of falls (falls per person-year)<br/>Follow-up: range 2 weeks to 12 months</td> <td>6105 falls per 1000 people (5198-7178)</td> <td>8250 falls per 1000 people</td> <td>RR: 0.74 (0.63-0.87)</td> </tr> </tbody> </table>                                                                                                                                                                                                                                                                                                                                                                                                                                                                                                                                                                                        | Outcome                      | № of patients |  | Effect | Intervention | Control | Relative / Absolute (95% CI) | Rate of falls (falls per person-year)<br>Follow-up: range 2 weeks to 12 months | 6105 falls per 1000 people (5198-7178) | 8250 falls per 1000 people | RR: 0.74 (0.63-0.87) | <p>Evidence is from a Cochrane review currently under peer review [12, 13]. The overall certainty of the evidence was downgraded to moderate as most participants had mild to moderate disease and good cognition – ie, those with advanced disease and/or cognitive impairment were excluded. Therefore the evidence for people with mild to moderate disease and good cognition is high certainty.</p> |
|----------------------------------------------------------------------------------------------------------------|-----------------------------------------------------------------------------------------------------------------------------------------------------------------------------------------------------------------------------------------------------------------------------------------------------------------------------------------------------------------------------------------------------------------------------------------------------------------------------------------|---------------------------------------------------------------------------------------------------------------------------------------------------------------------------------------------------------------------------------------------------------------------------------------------------------------------------------------------------------------------------------------------------------------------------------------------------------------------------------------------------------------------------------------------------------------------------------------------------------------------------------------------------------------------------------------------------------------------------------------------------------------------------------------------------------------------------------------------------------------------------------------------------------------------------------------------------------------------------------------------------------------------------------------------------------------------------------------------------------------------------------------|------------------------------|---------------|--|--------|--------------|---------|------------------------------|--------------------------------------------------------------------------------|----------------------------------------|----------------------------|----------------------|----------------------------------------------------------------------------------------------------------------------------------------------------------------------------------------------------------------------------------------------------------------------------------------------------------------------------------------------------------------------------------------------------------|
| Outcome                                                                                                        | № of patients                                                                                                                                                                                                                                                                                                                                                                                                                                                                           |                                                                                                                                                                                                                                                                                                                                                                                                                                                                                                                                                                                                                                                                                                                                                                                                                                                                                                                                                                                                                                                                                                                                       |                              | Effect        |  |        |              |         |                              |                                                                                |                                        |                            |                      |                                                                                                                                                                                                                                                                                                                                                                                                          |
|                                                                                                                | Intervention                                                                                                                                                                                                                                                                                                                                                                                                                                                                            | Control                                                                                                                                                                                                                                                                                                                                                                                                                                                                                                                                                                                                                                                                                                                                                                                                                                                                                                                                                                                                                                                                                                                               | Relative / Absolute (95% CI) |               |  |        |              |         |                              |                                                                                |                                        |                            |                      |                                                                                                                                                                                                                                                                                                                                                                                                          |
| Rate of falls (falls per person-year)<br>Follow-up: range 2 weeks to 12 months                                 | 6105 falls per 1000 people (5198-7178)                                                                                                                                                                                                                                                                                                                                                                                                                                                  | 8250 falls per 1000 people                                                                                                                                                                                                                                                                                                                                                                                                                                                                                                                                                                                                                                                                                                                                                                                                                                                                                                                                                                                                                                                                                                            | RR: 0.74 (0.63-0.87)         |               |  |        |              |         |                              |                                                                                |                                        |                            |                      |                                                                                                                                                                                                                                                                                                                                                                                                          |
| <p>How substantial are the undesirable anticipated effects of the intervention?</p>                            | <p>Mild to moderate PD with good cognition</p> <ul style="list-style-type: none"> <li>○ Trivial</li> <li>• <b>Small</b> <ul style="list-style-type: none"> <li>○ Moderate</li> <li>○ Large</li> <li>○ Varies</li> <li>○ Don't know</li> </ul> </li> </ul> <p>Advanced PD</p> <ul style="list-style-type: none"> <li>○ Trivial</li> <li>○ Small</li> <li>○ Moderate</li> <li>• <b>Large</b> <ul style="list-style-type: none"> <li>○ Varies</li> <li>○ Don't know</li> </ul> </li> </ul> | <p>Comments: Overall, exercise probably reduces the number of falls by 26% (95% CI 37% reduction to 13% reduction).</p> <p>Guide to the data:<br/>In the population of people with Parkinson's disease involved in exercise trials, if 1000 people with Parkinson's disease were followed over 1 year, the number of falls in the overall population would be 8250, compared to 6105 (95% CI 5198-7178) in people receiving exercise intervention.</p> <p><b>Overall analysis-- Mild to moderate disease and good cognition:</b><br/>There is <u>high certainty</u> evidence, therefore that <u>exercise reduces falls</u> in people with mild to moderate disease and good cognition by 26% (37% reduction to 13% as per the table above). The rate ratio overall is 0.74 (0.63 to 0.87).</p> <p><b>Subgroup analysis</b><br/><b>100% supervision:</b> There is <u>low certainty</u> evidence, that exercise that is fully supervised may reduce falls by 44% (59% reduction to 33% reduction). The rate ratio is 0.56 (0.41 to 0.77)<br/><b>&lt;100% supervision:</b> There is <u>moderate certainty</u> evidence that exercise</p> |                              |               |  |        |              |         |                              |                                                                                |                                        |                            |                      |                                                                                                                                                                                                                                                                                                                                                                                                          |
| <p>Does the balance between desirable effects and undesirable effects favour the option of the comparison?</p> | <p>Mild to moderate PD with good cognition</p> <ul style="list-style-type: none"> <li>• <b>Favours the option</b> <ul style="list-style-type: none"> <li>○ Probably favours the option</li> <li>○ Does not favour either</li> <li>○ Probably favours the</li> </ul> </li> </ul>                                                                                                                                                                                                         | <p><b>Subgroup analysis</b><br/><b>100% supervision:</b> There is <u>low certainty</u> evidence, that exercise that is fully supervised may reduce falls by 44% (59% reduction to 33% reduction). The rate ratio is 0.56 (0.41 to 0.77)<br/><b>&lt;100% supervision:</b> There is <u>moderate certainty</u> evidence that exercise</p>                                                                                                                                                                                                                                                                                                                                                                                                                                                                                                                                                                                                                                                                                                                                                                                                |                              |               |  |        |              |         |                              |                                                                                |                                        |                            |                      |                                                                                                                                                                                                                                                                                                                                                                                                          |

|  |                                                                                                                                                                                                                                                                                                                                                                                         |                                                                                                                                                                                                                                                                                                                                                                                                                                                                                                                                                                                                                                                                                                                                                                                                                                                                                                                                                                                                                                                                                                                                                                                                                                                          |  |
|--|-----------------------------------------------------------------------------------------------------------------------------------------------------------------------------------------------------------------------------------------------------------------------------------------------------------------------------------------------------------------------------------------|----------------------------------------------------------------------------------------------------------------------------------------------------------------------------------------------------------------------------------------------------------------------------------------------------------------------------------------------------------------------------------------------------------------------------------------------------------------------------------------------------------------------------------------------------------------------------------------------------------------------------------------------------------------------------------------------------------------------------------------------------------------------------------------------------------------------------------------------------------------------------------------------------------------------------------------------------------------------------------------------------------------------------------------------------------------------------------------------------------------------------------------------------------------------------------------------------------------------------------------------------------|--|
|  | <p>comparison</p> <ul style="list-style-type: none"> <li>○ Favours the comparison</li> <li>○ Varies</li> </ul> <p>Advanced PD</p> <ul style="list-style-type: none"> <li>○ Favours the option</li> <li>○ Probably favours the option</li> <li>● <b>Does not favour either</b></li> <li>○ Probably favours the comparison</li> <li>○ Favours the comparison</li> <li>○ Varies</li> </ul> | <p>that is partially supervised probably reduces the rate of falls by 15% (25% reduction to 3% reduction). The rate ratio is 0.85 (0.75 to 0.97).</p> <p><b>Pooled subgroup data</b></p> <p><b>More advanced disease:</b> Two studies performed subgroup analyses according to disease severity. When the subgroup data for participants with more advanced disease ([14], MDS-UPDRS equivalent motor score of <math>\geq 34</math>; [15], MDS-UPDRS motor score <math>\geq 39</math>) is pooled, there is <u>very low certainty evidence</u>, therefore we are unsure of the effect of exercise on the rate of falls in people with moderately advanced disease. The rate ratio for this subgroup was 1.47 (1.11 to 1.94) – ie, a 47% <u>increase</u> in the rate of falls (11% increase to 94% increase). Notably, the exercise programs in these trials were minimally supervised. There are no studies with participants with substantially impaired cognition (MMSE &lt; 24).</p> <p><b>Adverse Events</b></p> <p>The unpublished Cochrane review found that adverse events were not reported consistently, however when they were reported, they were overall minor and transient in nature (eg muscle soreness, musculoskeletal injury) [12].</p> |  |
|--|-----------------------------------------------------------------------------------------------------------------------------------------------------------------------------------------------------------------------------------------------------------------------------------------------------------------------------------------------------------------------------------------|----------------------------------------------------------------------------------------------------------------------------------------------------------------------------------------------------------------------------------------------------------------------------------------------------------------------------------------------------------------------------------------------------------------------------------------------------------------------------------------------------------------------------------------------------------------------------------------------------------------------------------------------------------------------------------------------------------------------------------------------------------------------------------------------------------------------------------------------------------------------------------------------------------------------------------------------------------------------------------------------------------------------------------------------------------------------------------------------------------------------------------------------------------------------------------------------------------------------------------------------------------|--|

|                        |                                                                                                                                                                             |                                                                                                                                                                                                                                                       |                                                                                                                                                                                                                                                                                                                                          |                                                                                                                                                                                                                                                                             |
|------------------------|-----------------------------------------------------------------------------------------------------------------------------------------------------------------------------|-------------------------------------------------------------------------------------------------------------------------------------------------------------------------------------------------------------------------------------------------------|------------------------------------------------------------------------------------------------------------------------------------------------------------------------------------------------------------------------------------------------------------------------------------------------------------------------------------------|-----------------------------------------------------------------------------------------------------------------------------------------------------------------------------------------------------------------------------------------------------------------------------|
| Values and preferences | Is there similarity about how much patients, researchers, clinicians and stake holders value the main Outcomes? Also include adverse effects and burden of the intervention | <ul style="list-style-type: none"> <li>○ No</li> <li>○ Probably no</li> <li>● <b>Uncertain</b></li> <li>○ Probably yes</li> <li>○ Yes</li> <li>○ Varies</li> </ul>                                                                                    |                                                                                                                                                                                                                                                                                                                                          |                                                                                                                                                                                                                                                                             |
| Resources              | What is the certainty of the evidence of resources requirements (costs)?                                                                                                    | <ul style="list-style-type: none"> <li>○ No studies</li> <li>○ Very low</li> <li>○ Low</li> <li>○ Moderate</li> <li>○ High</li> <li>● <b>Varies</b></li> </ul>                                                                                        | [19-23]                                                                                                                                                                                                                                                                                                                                  | Studies with less supervision have lower costs, however the subgroup analysis shows that full supervision may be more effective than less supervision. The implementation cost at a national level may be significant.                                                      |
|                        | Does the cost effectiveness favour the intervention or the comparison?                                                                                                      | <ul style="list-style-type: none"> <li>○ Favours the option</li> <li>○ Probably favours the option</li> <li>○ Does not favour either</li> <li>○ Probably favours the comparison</li> <li>○ Favours the comparison</li> <li>● <b>Varies</b></li> </ul> | The most cost-effective programs [14, 25, 26] have involved twice weekly group-based Tai-Chi delivered by an instructor [26] or balance and strengthening exercises [14, 25] delivered in a group setting by a physiotherapist (weekly for [25], monthly for [14]) with additional twice [25] to thrice [14] weekly home-based sessions. | Very little data but appears that exercise may be cost effective in terms of cost per fall prevented in people with mild to moderate disease severity and good cognition. Negative ICERs indicate that the intervention is dominant, i.e., more effective, and less costly. |

|        |                                            |                                                                                                                                                                                          |                   |                                                                                                                                                                                                                                                                                                                                                                                                                                                                                                                                                                                                                                                                                                                                                          |
|--------|--------------------------------------------|------------------------------------------------------------------------------------------------------------------------------------------------------------------------------------------|-------------------|----------------------------------------------------------------------------------------------------------------------------------------------------------------------------------------------------------------------------------------------------------------------------------------------------------------------------------------------------------------------------------------------------------------------------------------------------------------------------------------------------------------------------------------------------------------------------------------------------------------------------------------------------------------------------------------------------------------------------------------------------------|
| Equity | What would be the impact on health equity? | <ul style="list-style-type: none"> <li>○ Increased</li> <li>○ Probably increased</li> <li>○ Uncertain</li> <li>○ Probably reduced</li> <li>○ Reduced</li> <li>● <b>Varies</b></li> </ul> | No research found | <p>Effects on equity are likely to vary. In systems where access is possible through public funding it may decrease inequities by improving access to intervention in people with PD that have not previously had appropriate access to effective interventions. In jurisdictions where public funding to deliver the intervention cannot be accessed, and funding is required, intervention may only be accessed by individuals who are able to pay, so inequities may increase.</p> <p>In research studies, exercise has typically been delivered and/or prescribed and/ by a health professional with expertise in PD, mostly physiotherapists. While ideal, such trained health professionals may not always be available in every jurisdiction.</p> |
|--------|--------------------------------------------|------------------------------------------------------------------------------------------------------------------------------------------------------------------------------------------|-------------------|----------------------------------------------------------------------------------------------------------------------------------------------------------------------------------------------------------------------------------------------------------------------------------------------------------------------------------------------------------------------------------------------------------------------------------------------------------------------------------------------------------------------------------------------------------------------------------------------------------------------------------------------------------------------------------------------------------------------------------------------------------|

|                                                         |                                                      |                                                                                                                                                                    |                                                                                                                                                                                                                     |                                                                                                |
|---------------------------------------------------------|------------------------------------------------------|--------------------------------------------------------------------------------------------------------------------------------------------------------------------|---------------------------------------------------------------------------------------------------------------------------------------------------------------------------------------------------------------------|------------------------------------------------------------------------------------------------|
| <p style="text-align: center;"><b>Acceptability</b></p> | <p>Is the option acceptable to key stakeholders?</p> | <ul style="list-style-type: none"> <li>○ No</li> <li>○ Probably no</li> <li>○ Uncertain</li> <li>○ Probably yes</li> <li>○ Yes</li> <li>● <b>Varies</b></li> </ul> | <p>The option is acceptable to people with PD. Retention rates in exercise trials is generally high (&gt;85%) and there is good adherence to exercise interventions in people with PD (generally &gt;80%) [28].</p> | <p>The acceptability of an exercise program is likely to vary between individuals with PD.</p> |
|---------------------------------------------------------|------------------------------------------------------|--------------------------------------------------------------------------------------------------------------------------------------------------------------------|---------------------------------------------------------------------------------------------------------------------------------------------------------------------------------------------------------------------|------------------------------------------------------------------------------------------------|

|             |                                            |                                                                                                                                                                                                                                                                                                       |                                                                            |                                                                                                                                                                                                                                             |
|-------------|--------------------------------------------|-------------------------------------------------------------------------------------------------------------------------------------------------------------------------------------------------------------------------------------------------------------------------------------------------------|----------------------------------------------------------------------------|---------------------------------------------------------------------------------------------------------------------------------------------------------------------------------------------------------------------------------------------|
| Feasibility | Is the intervention feasible to implement? | <ul style="list-style-type: none"> <li><input type="radio"/> No</li> <li><input type="radio"/> Probably no</li> <li><input type="radio"/> Uncertain</li> <li><input type="radio"/> Probably yes</li> <li><input type="radio"/> Yes</li> <li><input checked="" type="radio"/> <b>Varies</b></li> </ul> | Research has shown exercise interventions for people with PD are feasible. | The ability of health care systems to fund such programs will vary between countries and jurisdictions, dependent upon funding and staffing. Cost constraints may be barriers to providing widely available exercise by trained therapists. |
|-------------|--------------------------------------------|-------------------------------------------------------------------------------------------------------------------------------------------------------------------------------------------------------------------------------------------------------------------------------------------------------|----------------------------------------------------------------------------|---------------------------------------------------------------------------------------------------------------------------------------------------------------------------------------------------------------------------------------------|

**Should \_\_\_ be recommended for older adults to prevent and manage falls?**

| Type of recommendation | Strong recommendation against the intervention<br><input type="radio"/>                                                                                                                                                                                                                                                                                                                                                                                                                                                                                                                                                                                                                                                                                                                                                                                                                                                                                                                                                                                                                                                                                                                                                                                                                                                                                                                                                                                                                                                                                                                                                                                                                                                                            | Weak recommendation against the intervention<br><input type="radio"/> | Conditional recommendation for either the intervention or the comparison<br><input type="radio"/> | Weak recommendation for the intervention<br><input type="radio"/> | Strong recommendation for the intervention<br><input checked="" type="radio"/> |
|------------------------|----------------------------------------------------------------------------------------------------------------------------------------------------------------------------------------------------------------------------------------------------------------------------------------------------------------------------------------------------------------------------------------------------------------------------------------------------------------------------------------------------------------------------------------------------------------------------------------------------------------------------------------------------------------------------------------------------------------------------------------------------------------------------------------------------------------------------------------------------------------------------------------------------------------------------------------------------------------------------------------------------------------------------------------------------------------------------------------------------------------------------------------------------------------------------------------------------------------------------------------------------------------------------------------------------------------------------------------------------------------------------------------------------------------------------------------------------------------------------------------------------------------------------------------------------------------------------------------------------------------------------------------------------------------------------------------------------------------------------------------------------|-----------------------------------------------------------------------|---------------------------------------------------------------------------------------------------|-------------------------------------------------------------------|--------------------------------------------------------------------------------|
| Recommendation         | <p>Recommendation 3: We recommend individualized supervised exercise as a falls prevention strategy for adults living in long-term care settings. GRADE: 1B</p> <p>Recommendation 4: We recommend that people with Parkinson’s Disease at an early to mid-stage and with mild or no cognitive impairment are offered individualized exercise programmes including balance and resistant training exercise. GRADE: 1A</p>                                                                                                                                                                                                                                                                                                                                                                                                                                                                                                                                                                                                                                                                                                                                                                                                                                                                                                                                                                                                                                                                                                                                                                                                                                                                                                                           |                                                                       |                                                                                                   |                                                                   |                                                                                |
| Justification          | <p>Justification (recommendation 1)<br/>Given the high frequency of falls amongst people with PD, the effectiveness of exercise in reducing falls in people with mild to moderate disease, and the minor and transient effects of most exercise-related adverse events, we concluded that most people with mild to moderate PD would choose to undertake a falls prevention exercise program.</p> <p>Justification (recommendation 2)<br/>Increasing the level of supervision may improve the effectiveness of the exercise. People with PD have complex impairments, therefore a trained health or fitness professional should be involved in the prescription and monitoring of the exercise if possible.</p> <p>Justification (recommendation 3)<br/>There is a lack of research regarding the effect of exercise on falls in people with advanced disease and/or impaired cognition. However, there is very low certainty evidence that minimally supervised exercise may substantially increase the rate of falls in people with more advanced disease.</p> <p><b>Detailed justification</b><br/><u>Balance of effects</u><br/>Although information about adverse events associated with exercise in people with PD is inconsistently reported, the balance of desirable and undesirable effects favours exercise. Exercise reduces fall rates by 26% in people with mild to moderate disease and good cognition. This equates to 2,145 fewer falls per year per 1,000 people with PD who undertake an exercise program. Adverse events from exercise interventions appear to be infrequent, minor and transient in nature (eg muscle soreness and musculoskeletal injuries). We therefore conclude that the net benefit for these people</p> |                                                                       |                                                                                                   |                                                                   |                                                                                |

|                               |                                                                                                                                                                                                                                                                                                                                                                                                                                                                                                                                                                                                                                                                                                                                                                                                                                                                                                                                                                                                                                                                                                                                                                                                                                                                                                                                                                                                                                                                                                                                                                                                                                                                                                                                                                                                                                                                                                                                                                                                                                                                                                                                                                                                                                                                                                                                                                                                                                                                                                                                                                                                                                                  |
|-------------------------------|--------------------------------------------------------------------------------------------------------------------------------------------------------------------------------------------------------------------------------------------------------------------------------------------------------------------------------------------------------------------------------------------------------------------------------------------------------------------------------------------------------------------------------------------------------------------------------------------------------------------------------------------------------------------------------------------------------------------------------------------------------------------------------------------------------------------------------------------------------------------------------------------------------------------------------------------------------------------------------------------------------------------------------------------------------------------------------------------------------------------------------------------------------------------------------------------------------------------------------------------------------------------------------------------------------------------------------------------------------------------------------------------------------------------------------------------------------------------------------------------------------------------------------------------------------------------------------------------------------------------------------------------------------------------------------------------------------------------------------------------------------------------------------------------------------------------------------------------------------------------------------------------------------------------------------------------------------------------------------------------------------------------------------------------------------------------------------------------------------------------------------------------------------------------------------------------------------------------------------------------------------------------------------------------------------------------------------------------------------------------------------------------------------------------------------------------------------------------------------------------------------------------------------------------------------------------------------------------------------------------------------------------------|
|                               | <p>with PD is high.</p> <p>Fully supervised exercise may have a greater effect on reducing falls, however there is no evidence regarding the effect of supervision on the number or nature of adverse events. There is a subgroup difference between fully supervised and less than fully supervised exercise, where fully supervised exercise may reduce fall rates by 44% (equivalent to 3,630 fewer falls per year per 1,000 people with PD who undertake an exercise program) and less than fully supervised exercise probably reduces fall rates by 15% (equivalent to 1,238 fewer falls per year per 1,000 people with PD who undertake an exercise program). We consider it unlikely that increased supervision would increase adverse events, and therefore the balance of effects favours increased supervision.</p> <p>The balance of effects is less clear for people with advanced disease. There is little information to guide recommendations for this group, and we are unsure if exercise has an adverse effect of increasing the rate of falls in this group. There are no studies including participants with PD and impaired cognition (MMSE &lt; 24).</p> <p><u>Quality of evidence</u></p> <p>While the level of certainty that exercise reduces falls in people with PD overall is moderate, there is a high level of certainty that it reduces falls in people with mild to moderate disease and good cognition. Fully supervised exercise may lead to a greater reduction in fall rates (low certainty evidence).</p> <p>We are unsure if exercise increases fall rates in people with more advanced disease due to minimal evidence that is of very low certainty for this group.</p> <p><u>Values and preferences</u></p> <p>The alternative management strategy is for no exercise. The acceptability of an exercise program is likely to vary between individuals with PD. However, research trials have high overall retention and adherence rates. Additionally, most people with PD fear falling and are willing to undertake activities designed to reduce their risk of falling. This suggests that many people with PD would prefer to undertake exercise if it would reduce their rate of falling.</p> <p><u>Costs</u></p> <p>There is little information about the cost effectiveness of exercise for fall prevention in people with PD, however there is some evidence that it may be cost-effective in people with mild to moderate disease and no cognitive impairment. Additionally, the cost of this intervention is relatively small to moderate, depending on the level of supervision provided.</p> |
| Subgroup considerations       | Recommendations are made on the basis of subgroup analyses.                                                                                                                                                                                                                                                                                                                                                                                                                                                                                                                                                                                                                                                                                                                                                                                                                                                                                                                                                                                                                                                                                                                                                                                                                                                                                                                                                                                                                                                                                                                                                                                                                                                                                                                                                                                                                                                                                                                                                                                                                                                                                                                                                                                                                                                                                                                                                                                                                                                                                                                                                                                      |
| Implementation considerations | <p>A training program will be required for therapists/exercise providers to ensure they have the expertise in exercise prescription for people with PD.</p> <p>Systems will be required to make affordable exercise options widely available to people with PD.</p> <p>Providing fully supervised exercise may not be acceptable to health care services due to the cost and resource requirements.</p>                                                                                                                                                                                                                                                                                                                                                                                                                                                                                                                                                                                                                                                                                                                                                                                                                                                                                                                                                                                                                                                                                                                                                                                                                                                                                                                                                                                                                                                                                                                                                                                                                                                                                                                                                                                                                                                                                                                                                                                                                                                                                                                                                                                                                                          |



|                           |                                                                                                                                                                                                                                                                                                                                                                                                                                                                                                                                                                                                                                                                                                                                        |
|---------------------------|----------------------------------------------------------------------------------------------------------------------------------------------------------------------------------------------------------------------------------------------------------------------------------------------------------------------------------------------------------------------------------------------------------------------------------------------------------------------------------------------------------------------------------------------------------------------------------------------------------------------------------------------------------------------------------------------------------------------------------------|
|                           | <p>Effectiveness of the exercise intervention will drive the cost-effectiveness of the program.</p> <p>In people with mild to moderate disease, programs that include an exercise class taught by a health professional supplemented with home-based training (eg.[13]) are likely to be more cost effective.</p>                                                                                                                                                                                                                                                                                                                                                                                                                      |
| Monitoring and evaluation | <p>Falls and fall-related injuries should be continuously monitored and evaluated over time with appropriate statistical techniques. The amount and type of physical activity undertaken should also be monitored.</p>                                                                                                                                                                                                                                                                                                                                                                                                                                                                                                                 |
| Research Priorities       | <p>The type, dose and location of exercise that is best to reduce falls</p> <p>The level of supervision required to be optimally effective</p> <p>Effect of exercise interventions on fall rates in people with advanced disease and/or cognitive impairment</p> <p>Cost effectiveness of fall prevention exercise</p> <p>Strategies to implement exercise into the routine care of people with PD</p> <p>Effect of exercise on adverse events</p> <p>The effect of multifactorial and multiple component interventions, including exercise, on fall rates across the PD disease spectrum.</p> <p>Trials need to be conducted in a range of countries with differing health care and community support systems and funding models.</p> |

## References

1. Dorsey ER, Elbaz A, Nichols E (2018) Global, regional, and national burden of Parkinson's disease, 1990-2016: a systematic analysis for the Global Burden of Disease Study 2016. *Lancet Neurol.* 17:939-953.
2. Allen NE, Schwarzel AK, Canning CG (2013) Recurrent falls in Parkinson's disease: a systematic review. *Parkinsons Dis.* 2013:906274.
3. Sherrington C, Fairhall NJ, Wallbank GK et al (2019) Exercise for preventing falls in older people living in the community. *Cochrane Database Syst Rev.* 1:Cd012424.
4. Kalilani L, Asgharnejad M, Palokangas T et al (2016) Comparing the Incidence of Falls/Fractures in Parkinson's Disease Patients in the US Population. *pLoS One.* 11:e0161689.
5. Walker RW, Chaplin A, Hancock RL et al (2013) Hip fractures in people with idiopathic Parkinson's disease: incidence and outcomes. *Mov Disord.* 28:334-40.
6. Soh SE, McGinley JL, Watts JJ et al (2013) Determinants of health-related quality of life in people with Parkinson's disease: a path analysis. *Qual Life Res.* 22:1543-53.
7. Schrag A, Hovris A, Morley D et al (2006) Caregiver-burden in parkinson's disease is closely associated with psychiatric symptoms, falls, and disability. *Parkinsonism Relat Disord.* 12:35-41.
8. Walker RW, Palmer J, Stancliffe J et al (2014) Experience of care home residents with Parkinson's disease: Reason for admission and service use. *Geriatr Gerontol Int.* 14:947-53.
9. Paul SS, Harvey L, Canning CG et al (2017) Fall-related hospitalization in people with Parkinson's disease. *Eur J Neurol.* 24:523-529.
10. Weir S, Samnaliev M, Kuo TC et al (2018) Short- and long-term cost and utilization of health care resources in Parkinson's disease in the UK. *Mov Disord.* 33:974-981.
11. Huang Y, Canning CG, Song J et al (2021) How does perceived fall risk influence decisions about whether to undertake activities in people with Parkinson's disease and their care partners? A qualitative study. *Disabil Rehabil.* 1-9.
12. Allen NE, Canning CG, Almeida LRS et al (Under review) Interventions for preventing falls in Parkinson's disease. *Cochrane Database of Systematic Reviews.*
13. Canning CG, Allen NE, Bloem BR et al (2015) Interventions for preventing falls in Parkinson's disease. *Cochrane Database of Systematic Reviews.*
14. Canning CG, Sherrington C, Lord SR et al (2015) Exercise for falls prevention in Parkinson disease: a randomized controlled trial. *Neurology.* 84:304-12.
15. Chivers Seymour K, Pickering R, Rochester L et al (2019) Multicentre, randomised controlled trial of PDSAFE, a physiotherapist-delivered fall prevention programme for people with Parkinson's. *J Neurol Neurosurg Psychiatry.* 90:774-782.
16. Henderson EJ, Morgan GS, Amin J et al (2019) The minimum clinically important difference (MCID) for a falls intervention in Parkinson's: A delphi study. *Parkinsonism Relat Disord.* 61:106-110.
17. Capato TTC, Nonnekes J, de Vries NM et al (2020) Effects of multimodal balance training supported by rhythmical auditory stimuli in people with advanced stages of Parkinson's disease: a pilot randomized clinical trial. *J Neurol Sci.* 418:117086.
18. WHO, *WHO guidelines on physical activity and sedentary behaviour.* 2020, World Health Organisation: Geneva.
19. Farag I, Sherrington C, Hayes A et al (2016) Economic evaluation of a falls prevention exercise program among people With Parkinson's disease. *Mov Disord.* 31:53-61.
20. Xin Y, Ashburn A, Pickering RM et al (2020) Cost-effectiveness of the PDSAFE personalised physiotherapy intervention for fall prevention in Parkinson's: an economic evaluation alongside a randomised controlled trial. *BMC Neurol.* 20:295.
21. Gandolfi M, Geroi C, Dimitrova E et al (2017) Virtual Reality Telerehabilitation for Postural Instability in Parkinson's Disease: A Multicenter, Single-Blind, Randomized, Controlled Trial. *Biomed Res Int.* 2017:7962826.
22. Fletcher E, Goodwin VA, Richards SH et al (2012) An exercise intervention to prevent falls in Parkinson's: an economic evaluation. *BMC Health Serv Res.* 12:426.
23. Li F, Harmer P (2015) Economic Evaluation of a Tai Ji Quan Intervention to Reduce Falls in People With Parkinson Disease, Oregon, 2008-2011. *Prev Chronic Dis.* 12:E120.

24. Munneke M, Nijkrake MJ, Keus SH et al (2010) Efficacy of community-based physiotherapy networks for patients with Parkinson's disease: a cluster-randomised trial. *Lancet Neurol.* 9:46-54.
25. Goodwin VA, Richards SH, Henley W et al (2011) An exercise intervention to prevent falls in people with Parkinson's disease: a pragmatic randomised controlled trial. *J Neurol Neurosurg Psychiatry.* 82:1232-8.
26. Li F, Harmer P, Fitzgerald K et al (2012) Tai chi and postural stability in patients with Parkinson's disease. *N Engl J Med.* 366:511-9.
27. Goetz CG, Tilley BC, Shaftman SR et al (2008) Movement Disorder Society-sponsored revision of the Unified Parkinson's Disease Rating Scale (MDS-UPDRS): scale presentation and clinimetric testing results. *Mov Disord.* 23:2129-70.
28. Allen NE, Sherrington C, Suriyarachchi GD et al (2012) Exercise and motor training in people with Parkinson's disease: a systematic review of participant characteristics, intervention delivery, retention rates, adherence, and adverse events in clinical trials. *Parkinsons Dis.* 2012:854328.

## **Recommendations for Working Group 4: Exercise and Falls**

**Recommendation 5: We conditionally recommend that older adults after a stroke should be offered participation in individualized exercise programmes aimed at improving balance/strength/walking to prevent falls. GRADE:2C**

| <b>Population:</b>             | People with stroke                                                                | <b>Objective:</b> Should exercise versus no exercise be used to reduce falls in people with Stroke?                                                                |                                                                                                                                                                                                                                                                                                                                                                                                                                                                                                                                                                                                                                                                                                       |                                                                                                                                                                                                                                                                                                                                                           |
|--------------------------------|-----------------------------------------------------------------------------------|--------------------------------------------------------------------------------------------------------------------------------------------------------------------|-------------------------------------------------------------------------------------------------------------------------------------------------------------------------------------------------------------------------------------------------------------------------------------------------------------------------------------------------------------------------------------------------------------------------------------------------------------------------------------------------------------------------------------------------------------------------------------------------------------------------------------------------------------------------------------------------------|-----------------------------------------------------------------------------------------------------------------------------------------------------------------------------------------------------------------------------------------------------------------------------------------------------------------------------------------------------------|
| <b>Intervention:</b>           | Exercise aimed at improving strength/balance/walking                              |                                                                                                                                                                    |                                                                                                                                                                                                                                                                                                                                                                                                                                                                                                                                                                                                                                                                                                       |                                                                                                                                                                                                                                                                                                                                                           |
| <b>Comparison:</b>             | No exercise or exercise not challenging to balance                                |                                                                                                                                                                    |                                                                                                                                                                                                                                                                                                                                                                                                                                                                                                                                                                                                                                                                                                       |                                                                                                                                                                                                                                                                                                                                                           |
| <b>Main outcomes:</b>          | Falls                                                                             |                                                                                                                                                                    |                                                                                                                                                                                                                                                                                                                                                                                                                                                                                                                                                                                                                                                                                                       |                                                                                                                                                                                                                                                                                                                                                           |
| <b>Setting:</b>                | All                                                                               |                                                                                                                                                                    |                                                                                                                                                                                                                                                                                                                                                                                                                                                                                                                                                                                                                                                                                                       |                                                                                                                                                                                                                                                                                                                                                           |
| <b>Perspective:</b>            | International guidelines: people with stroke, health professionals, policy makers |                                                                                                                                                                    |                                                                                                                                                                                                                                                                                                                                                                                                                                                                                                                                                                                                                                                                                                       |                                                                                                                                                                                                                                                                                                                                                           |
| Decision Domain                |                                                                                   | Judgements                                                                                                                                                         | Research Evidence                                                                                                                                                                                                                                                                                                                                                                                                                                                                                                                                                                                                                                                                                     | Additional Considerations /Explanations                                                                                                                                                                                                                                                                                                                   |
| <b>Priority of the Problem</b> | Is the problem a priority?                                                        | <ul style="list-style-type: none"> <li>○ No</li> <li>○ Probably no</li> <li>○ Uncertain</li> <li>○ Probably yes</li> <li>● <b>Yes</b></li> <li>○ Varies</li> </ul> | Between 50 and 73% of people with stroke will fall in a given year [1, 2], which is twice the likelihood of falls in the general older population [3]. People with stroke also have higher rates of injury, particularly fractured neck of femur, with a rate 2 times higher than in the general population [4]. Falls are costly to the individual and the healthcare system [5] and have a negative impact on quality of life, concerns about falling and participation [6, 7]. Despite recent advances in treatment of acute stroke, the world-wide incidence and prevalence of stroke is increasing [8, 9]. Therefore the public health impact of falls in people with stroke is also increasing. | Falls are costly to the individual and the healthcare system [5]. Falls are associated with reduced quality of life, concerns about falling[6, 7], care giver burden [10] and nursing home admission [11]. There is evidence that many people with stroke are fearful of falling and modify their activities to try to reduce their risk of falling [12]. |

|                                          |                                                                                                                                        |                                                                                                                                                                                                                                                                                                         |                                                              |                            |                                          |                                                                                                                                                                                                                                                                                                                                                                                                                                                                                                                                                                                                                                                                                                 |
|------------------------------------------|----------------------------------------------------------------------------------------------------------------------------------------|---------------------------------------------------------------------------------------------------------------------------------------------------------------------------------------------------------------------------------------------------------------------------------------------------------|--------------------------------------------------------------|----------------------------|------------------------------------------|-------------------------------------------------------------------------------------------------------------------------------------------------------------------------------------------------------------------------------------------------------------------------------------------------------------------------------------------------------------------------------------------------------------------------------------------------------------------------------------------------------------------------------------------------------------------------------------------------------------------------------------------------------------------------------------------------|
| <b>Benefits and harms</b><br>(see below) | Is there important uncertainty or variability in how much patients, researchers, clinicians and stake holders value the main outcomes? | <ul style="list-style-type: none"> <li>○ Important uncertainty or variability</li> <li>○ Possibly important uncertainty or variability</li> <li>○ Probably no important uncertainty of variability</li> <li>● <b>No important uncertainty of variability</b></li> <li>○ No known undesirable</li> </ul> | <b>Relative importance of the main outcomes of interest:</b> |                            |                                          | <p>Not formally assessed. It is assumed that most people with stroke place a high value on falls and fall-injury prevention.</p> <p>Based on a range of benefits of exercise, the World Health Organization guidelines recommend that all older adults should undertake regular physical activity and that older adults should be as physically active as their functional ability allows, and adjust their level of effort for physical activity relative to their level of fitness [18]. For people with stroke, exercise may be beneficial for other aspects including reducing disability, improving cardiovascular fitness, mood and targeting risk factors for further stroke [19-22]</p> |
|                                          | What is the overall certainty of this evidence?                                                                                        | <ul style="list-style-type: none"> <li>○ No studies</li> <li>○ Very low</li> <li>● <b>Low</b></li> <li>○ Moderate</li> <li>○ High</li> </ul>                                                                                                                                                            | <b>Outcome</b>                                               | <b>Relative Importance</b> | <b>Certainty of the evidence (GRADE)</b> |                                                                                                                                                                                                                                                                                                                                                                                                                                                                                                                                                                                                                                                                                                 |
|                                          |                                                                                                                                        |                                                                                                                                                                                                                                                                                                         | Rate of falls                                                | Critical                   | ⊕⊕○○<br>LOW                              |                                                                                                                                                                                                                                                                                                                                                                                                                                                                                                                                                                                                                                                                                                 |
|                                          |                                                                                                                                        |                                                                                                                                                                                                                                                                                                         |                                                              |                            | ○○○○<br>MODERATE                         |                                                                                                                                                                                                                                                                                                                                                                                                                                                                                                                                                                                                                                                                                                 |
|                                          |                                                                                                                                        |                                                                                                                                                                                                                                                                                                         |                                                              |                            | ○○○○<br>MODERATE                         |                                                                                                                                                                                                                                                                                                                                                                                                                                                                                                                                                                                                                                                                                                 |
|                                          |                                                                                                                                        |                                                                                                                                                                                                                                                                                                         |                                                              |                            | ○○○○<br>MODERATE                         |                                                                                                                                                                                                                                                                                                                                                                                                                                                                                                                                                                                                                                                                                                 |
|                                          |                                                                                                                                        |                                                                                                                                                                                                                                                                                                         |                                                              |                            | ○○○○<br>MODERATE                         |                                                                                                                                                                                                                                                                                                                                                                                                                                                                                                                                                                                                                                                                                                 |
|                                          |                                                                                                                                        |                                                                                                                                                                                                                                                                                                         |                                                              |                            | ○○○○<br>MODERATE                         |                                                                                                                                                                                                                                                                                                                                                                                                                                                                                                                                                                                                                                                                                                 |
|                                          |                                                                                                                                        |                                                                                                                                                                                                                                                                                                         |                                                              |                            | ○○○○<br>MODERATE                         |                                                                                                                                                                                                                                                                                                                                                                                                                                                                                                                                                                                                                                                                                                 |
|                                          |                                                                                                                                        |                                                                                                                                                                                                                                                                                                         |                                                              |                            | ○○○○<br>MODERATE                         |                                                                                                                                                                                                                                                                                                                                                                                                                                                                                                                                                                                                                                                                                                 |

|                                                                                                                                                         |                                                                                                                                                                                                                                                       |                                                                                                                                                                                                                                                                                                                                                                                                                                                                                                                                                                                                                                                                                                                                                                                                                                                                                                                                                                                                                                                                                                                                                                                |                                   |                                             |                                                          |                             |  |
|---------------------------------------------------------------------------------------------------------------------------------------------------------|-------------------------------------------------------------------------------------------------------------------------------------------------------------------------------------------------------------------------------------------------------|--------------------------------------------------------------------------------------------------------------------------------------------------------------------------------------------------------------------------------------------------------------------------------------------------------------------------------------------------------------------------------------------------------------------------------------------------------------------------------------------------------------------------------------------------------------------------------------------------------------------------------------------------------------------------------------------------------------------------------------------------------------------------------------------------------------------------------------------------------------------------------------------------------------------------------------------------------------------------------------------------------------------------------------------------------------------------------------------------------------------------------------------------------------------------------|-----------------------------------|---------------------------------------------|----------------------------------------------------------|-----------------------------|--|
| <p>How substantial are the desirable anticipated effects of the intervention?</p>                                                                       | <ul style="list-style-type: none"> <li>• <b>Large</b></li> <li>○ Moderate</li> <li>○ Small</li> <li>○ Trivial</li> <li>○ Varies</li> <li>○ Don't know</li> </ul>                                                                                      | <p><i>Summary of findings (GRADE):</i></p>                                                                                                                                                                                                                                                                                                                                                                                                                                                                                                                                                                                                                                                                                                                                                                                                                                                                                                                                                                                                                                                                                                                                     |                                   |                                             |                                                          |                             |  |
| <p>How substantial are the undesirable anticipated effects of the intervention?</p>                                                                     | <ul style="list-style-type: none"> <li>○ Trivial</li> <li>• <b>Small</b></li> <li>○ Moderate</li> <li>○ Large</li> <li>○ Varies</li> <li>○ Don't know</li> </ul>                                                                                      | <p><b>Outcome</b></p>                                                                                                                                                                                                                                                                                                                                                                                                                                                                                                                                                                                                                                                                                                                                                                                                                                                                                                                                                                                                                                                                                                                                                          | <p><b>Intervention</b></p>        |                                             | <p><b>Effect</b></p>                                     |                             |  |
| <p>Does the balance between desirable effects and undesirable effects favour the option of the comparison?</p>                                          | <ul style="list-style-type: none"> <li>○ Favours the option</li> <li>• <b>Probably favours the option</b></li> <li>○ Does not favour either</li> <li>○ Probably favours the comparison</li> <li>○ Favours the comparison</li> <li>○ Varies</li> </ul> | <p>Rate of falls<br/>No of participants:638 (6 studies, 8 comparisons)</p>                                                                                                                                                                                                                                                                                                                                                                                                                                                                                                                                                                                                                                                                                                                                                                                                                                                                                                                                                                                                                                                                                                     | <p>1780 per 1000 person-years</p> | <p>979 per 1000 person-years (694-1388)</p> | <p>801 fewer per 1000 (from 1085 fewer to 373 fewer)</p> | <p>RR: 0.55 (0.39-0.78)</p> |  |
| <p>The evidence sources are the most recent Cochrane Review [13] and search of literature since the last search date stated in the Cochrane Review.</p> |                                                                                                                                                                                                                                                       | <p>The most recent Cochrane Review [13] concluded that for preventing falls in people after stroke, exercise may reduce the rate of falls compared to control, but that there is uncertainty about the result. The pooled result was a rate ratio of 0.72, 95%CI 0.45 to 0.94 including 764 participants, rated as low quality evidence according to the GRADE criteria. However, this review included some studies in which the control condition consisted of exercises that also target balance, strength and gait performance. While this is a valid approach in terms of evidence review, for the purpose of guidelines, the clinical question is whether exercise targeted at balance, strength or gait should be prescribed compared to no exercise or exercise that does not challenge balance e.g. upper limb. On this basis 2 studies were excluded: Dean 2010 [14], and Mansfield 2018 [15]. An additional study (Lau 2014 [16]) was excluded because the control condition included exercise that was the same as the intervention (but without full body vibration). One additional study that was published since the Cochrane review was also included [17]</p> |                                   |                                             |                                                          |                             |  |
| <p>The overall certainty of the evidence was downgraded to low due to inconsistency and imprecision</p>                                                 |                                                                                                                                                                                                                                                       |                                                                                                                                                                                                                                                                                                                                                                                                                                                                                                                                                                                                                                                                                                                                                                                                                                                                                                                                                                                                                                                                                                                                                                                |                                   |                                             |                                                          |                             |  |

|  |  |                                                                                                                                                                                                                                                                                                                                                                                                                      |  |
|--|--|----------------------------------------------------------------------------------------------------------------------------------------------------------------------------------------------------------------------------------------------------------------------------------------------------------------------------------------------------------------------------------------------------------------------|--|
|  |  | <p><b>Overall analysis Stroke (not including acute stroke):</b> There is <u>low</u> certainty evidence, that <u>strength, balance, and gait exercise</u> decreases falls compared to no exercise or exercise that doesn't challenge balance. The level of certainty in this evidence review is the same as the Cochrane Review [13].</p> <p>There were insufficient studies to undertake any sub-group analysis.</p> |  |
|--|--|----------------------------------------------------------------------------------------------------------------------------------------------------------------------------------------------------------------------------------------------------------------------------------------------------------------------------------------------------------------------------------------------------------------------|--|

|                                                                                                    |                                                                                                                                                                                                                                                                                                                                                                                                                                                                                                                                                         |                                                                                                                                                                    |                                                                                                                                                                                                                                                                                                                                                                                                                                                                 |                                                                                                                                                                                                                                                                                                                                                                                                                                                                                                                   |
|----------------------------------------------------------------------------------------------------|---------------------------------------------------------------------------------------------------------------------------------------------------------------------------------------------------------------------------------------------------------------------------------------------------------------------------------------------------------------------------------------------------------------------------------------------------------------------------------------------------------------------------------------------------------|--------------------------------------------------------------------------------------------------------------------------------------------------------------------|-----------------------------------------------------------------------------------------------------------------------------------------------------------------------------------------------------------------------------------------------------------------------------------------------------------------------------------------------------------------------------------------------------------------------------------------------------------------|-------------------------------------------------------------------------------------------------------------------------------------------------------------------------------------------------------------------------------------------------------------------------------------------------------------------------------------------------------------------------------------------------------------------------------------------------------------------------------------------------------------------|
| <p style="writing-mode: vertical-rl; transform: rotate(180deg);"><b>Values and preferences</b></p> | <p>Is there similarity about how much patients, researchers, clinicians and stake holders value the main Outcomes? Also include adverse effects and burden of the intervention</p>                                                                                                                                                                                                                                                                                                                                                                      | <ul style="list-style-type: none"> <li>○ No</li> <li>○ Probably no</li> <li>● <b>Uncertain</b></li> <li>○ Probably yes</li> <li>○ Yes</li> <li>○ Varies</li> </ul> |                                                                                                                                                                                                                                                                                                                                                                                                                                                                 |                                                                                                                                                                                                                                                                                                                                                                                                                                                                                                                   |
| <p style="writing-mode: vertical-rl; transform: rotate(180deg);"><b>Resources</b></p>              | <p>What is the certainty of the evidence of resources requirements (costs)?</p>                                                                                                                                                                                                                                                                                                                                                                                                                                                                         | <ul style="list-style-type: none"> <li>○ No studies</li> <li>○ Very low</li> <li>○ Low</li> <li>○ Moderate</li> <li>○ High</li> <li>● <b>Varies</b></li> </ul>     | <p>The included trials did not report costs of implementing the intervention. Collins (2018) [23] examined the costs and effectiveness of providing supervised exercise classes to people with stroke, which is broadly equivalent to the resources that might be required to deliver falls prevention exercise classes for people with stroke. The resource requirements are likely to vary with the type of exercise delivered and degree of supervision.</p> | <p>Intervention costs for an effective intervention have not been reported in the included studies. Resource requirements are likely to vary with amount of supervision provided and need for equipment. The intervention costs per individual are likely to be small relative to costs associated with injury, decreased quality of life and need for health care. The overall costs to implement exercise to a national population is likely to be high considering the total number of people with stroke.</p> |
|                                                                                                    | <p>Does the cost effectiveness favour the intervention or the comparison?</p> <ul style="list-style-type: none"> <li>○ Favours the option</li> <li>○ Probably favours the option</li> <li>○ Does not favour either</li> <li>○ Probably favours the comparison</li> <li>○ Favours the comparison</li> </ul> <p><b>Varies</b> The included trials did not report cost-effectiveness. Collins 2018 [23] reported that supervised exercise classes were cost-effective in improving physical fitness after stroke, but did not consider falls outcomes.</p> | <p>The cost-effectiveness for exercise in preventing falls in people with stroke is unknown.</p>                                                                   |                                                                                                                                                                                                                                                                                                                                                                                                                                                                 |                                                                                                                                                                                                                                                                                                                                                                                                                                                                                                                   |



|        |                                            |                                                                                                                                                                                          |                   |                                                                                                                                                                                                                                                                                                                                                                                                                                                                                                                                                                                                                                                                                                                                                                                                                                                                                                 |
|--------|--------------------------------------------|------------------------------------------------------------------------------------------------------------------------------------------------------------------------------------------|-------------------|-------------------------------------------------------------------------------------------------------------------------------------------------------------------------------------------------------------------------------------------------------------------------------------------------------------------------------------------------------------------------------------------------------------------------------------------------------------------------------------------------------------------------------------------------------------------------------------------------------------------------------------------------------------------------------------------------------------------------------------------------------------------------------------------------------------------------------------------------------------------------------------------------|
| Equity | What would be the impact on health equity? | <ul style="list-style-type: none"> <li>○ Increased</li> <li>○ Probably increased</li> <li>○ Uncertain</li> <li>○ Probably reduced</li> <li>○ Reduced</li> <li>● <b>Varies</b></li> </ul> | No research found | <p>It is assumed that effects on equity are likely to vary. In systems where access is possible through public funding it may decrease inequities by improving access to intervention in people with stroke that have not previously had appropriate access to effective interventions. In jurisdictions where public funding to deliver the intervention cannot be accessed, and funding is required, intervention may only be accessed by individuals who are able to pay, so inequities may increase.</p> <p>In research studies, exercise has typically been delivered and/or prescribed and/ by a health professional with expertise in stroke, mostly physiotherapists. Physical fitness training, ideally led by trained professionals is beneficial for people after stroke [22]. While ideal, such trained health professionals may not always be available in every jurisdiction.</p> |
|--------|--------------------------------------------|------------------------------------------------------------------------------------------------------------------------------------------------------------------------------------------|-------------------|-------------------------------------------------------------------------------------------------------------------------------------------------------------------------------------------------------------------------------------------------------------------------------------------------------------------------------------------------------------------------------------------------------------------------------------------------------------------------------------------------------------------------------------------------------------------------------------------------------------------------------------------------------------------------------------------------------------------------------------------------------------------------------------------------------------------------------------------------------------------------------------------------|

|                                                  |                                                      |                                                                                                                                                                    |                                                        |                                                                                                                                                                                                                                              |
|--------------------------------------------------|------------------------------------------------------|--------------------------------------------------------------------------------------------------------------------------------------------------------------------|--------------------------------------------------------|----------------------------------------------------------------------------------------------------------------------------------------------------------------------------------------------------------------------------------------------|
| <p style="text-align: center;">Acceptability</p> | <p>Is the option acceptable to key stakeholders?</p> | <ul style="list-style-type: none"> <li>○ No</li> <li>○ Probably no</li> <li>○ Uncertain</li> <li>○ Probably yes</li> <li>○ Yes</li> <li>● <b>Varies</b></li> </ul> | <p>Adherence to exercise after stroke is variable.</p> | <p>It is assumed that the acceptability of an exercise program is likely to vary between individuals with stroke and according to exercise type. There is currently a lack of research about how individual factors influence adherence.</p> |
|--------------------------------------------------|------------------------------------------------------|--------------------------------------------------------------------------------------------------------------------------------------------------------------------|--------------------------------------------------------|----------------------------------------------------------------------------------------------------------------------------------------------------------------------------------------------------------------------------------------------|

|             |                                            |                                                                                                                                                                    |                                                                                |                                                                                                                                                                                                                                                                |
|-------------|--------------------------------------------|--------------------------------------------------------------------------------------------------------------------------------------------------------------------|--------------------------------------------------------------------------------|----------------------------------------------------------------------------------------------------------------------------------------------------------------------------------------------------------------------------------------------------------------|
| Feasibility | Is the intervention feasible to implement? | <ul style="list-style-type: none"> <li>○ No</li> <li>○ Probably no</li> <li>○ Uncertain</li> <li>○ Probably yes</li> <li>○ Yes</li> <li>● <b>Varies</b></li> </ul> | Research has shown exercise interventions for people with stroke are feasible. | It is assumed that the ability of health care systems to fund such programs will vary between countries and jurisdictions, dependent upon funding and staffing. Cost constraints may be barriers to providing widely available exercise by trained therapists. |
|-------------|--------------------------------------------|--------------------------------------------------------------------------------------------------------------------------------------------------------------------|--------------------------------------------------------------------------------|----------------------------------------------------------------------------------------------------------------------------------------------------------------------------------------------------------------------------------------------------------------|

**Should \_\_\_ be recommended for older adults to prevent and manage falls?**

| Type of recommendation        | Strong recommendation against the intervention<br>○                                                                                                                                                                                                                                                                                                                                                                                                                                                                                                                                                                                                                                                                     | Weak recommendation against the intervention<br>○ | Conditional recommendation for either the intervention or the comparison<br>○ | Weak recommendation for the intervention<br>● | Strong recommendation for the intervention<br>○ |
|-------------------------------|-------------------------------------------------------------------------------------------------------------------------------------------------------------------------------------------------------------------------------------------------------------------------------------------------------------------------------------------------------------------------------------------------------------------------------------------------------------------------------------------------------------------------------------------------------------------------------------------------------------------------------------------------------------------------------------------------------------------------|---------------------------------------------------|-------------------------------------------------------------------------------|-----------------------------------------------|-------------------------------------------------|
| Recommendation                | Recommendation 5: We conditionally recommend that older adults after a stroke should be offered participation in individualized exercise programmes aimed at improving balance/strength/walking to prevent falls. GRADE:2C                                                                                                                                                                                                                                                                                                                                                                                                                                                                                              |                                                   |                                                                               |                                               |                                                 |
| Justification                 | The above recommendation is based on the point estimate and other systematic review evidence of health benefits of exercise aimed at improving strength/balance/walking in this clinical group [18] .                                                                                                                                                                                                                                                                                                                                                                                                                                                                                                                   |                                                   |                                                                               |                                               |                                                 |
| Subgroup considerations       | Subgroups were not considered due to small number of studies.                                                                                                                                                                                                                                                                                                                                                                                                                                                                                                                                                                                                                                                           |                                                   |                                                                               |                                               |                                                 |
| Implementation considerations | The optimal dosage and level of supervision of exercise for falls prevention in people after stroke is not known due to lack of evidence.                                                                                                                                                                                                                                                                                                                                                                                                                                                                                                                                                                               |                                                   |                                                                               |                                               |                                                 |
| Monitoring and evaluation     | Falls and fall-related injuries should be continuously monitored and evaluated over time with appropriate statistical techniques. The amount and type of physical activity undertaken should also be monitored.                                                                                                                                                                                                                                                                                                                                                                                                                                                                                                         |                                                   |                                                                               |                                               |                                                 |
| Research Priorities           | Overall, the number of studies and the certainty of evidence supporting the benefits of exercise for falls prevention in people with stroke is low. Additional research is needed with appropriate sample sizes to examine the effects of exercise compared to no exercise on all falls outcomes including injury. Health economic evaluation also needs to be incorporated into the design and reporting of trials. Additionally, more research is required to examine the effects of research on falls in for different levels of stroke severity and in different stages of acuity. Trials need to be conducted in a range of countries with differing health care and community support systems and funding models. |                                                   |                                                                               |                                               |                                                 |

## References

1. Ashburn A, Hyndman D, Pickering R et al (2008) Predicting people with stroke at risk of falls. *Age and Ageing*. 37:270-276.
2. Jørgensen L, Engstad T, Jacobsen BK (2002) Higher incidence of falls in long-term stroke survivors than in population controls: depressive symptoms predict falls after stroke. *Stroke*. 33:542-547.
3. Sherrington C, Fairhall NJ, Wallbank GK et al (2019) Exercise for preventing falls in older people living in the community. *Cochrane database of systematic reviews*.
4. Pouwels S, Lalmohamed A, Leufkens B et al (2009) Risk of Hip/Femur Fracture After Stroke. *Stroke*. 40:3281-3285.
5. Burns ER, Stevens JA, Lee R (2016) The direct costs of fatal and non-fatal falls among older adults—United States. *Journal of safety research*. 58:99-103.
6. Schoene D, Heller C, Aung YN et al (2019) A systematic review on the influence of fear of falling on quality of life in older people: is there a role for falls? *Clinical interventions in aging*. 14:701.
7. Stenhagen M, Ekström H, Nordell E et al (2014) Accidental falls, health-related quality of life and life satisfaction: A prospective study of the general elderly population. *Archives of Gerontology and Geriatrics*. 58:95-100.
8. Venketasubramanian N (2021) Stroke Epidemiology in Oceania: A Review. *Neuroepidemiology*:1-10.
9. Feigin VL, Lawes CM, Bennett DA et al (2003) Stroke epidemiology: a review of population-based studies of incidence, prevalence, and case-fatality in the late 20<sup>th</sup> century. *Lancet Neurol*. 2:43-53.
10. Joo H, Wang G, Yee SL et al (2017) Economic burden of informal caregiving associated with history of stroke and falls among older adults in the US. *American journal of preventive medicine*. 53:S197-S204.
11. Gill TM, Murphy TE, Gahbauer EA et al (2013) Association of Injurious Falls With Disability Outcomes and Nursing Home Admissions in Community-Living Older Persons. *American Journal of Epidemiology*. 178:418-425.
12. Schmid AA, Arnold SE, Jones VA et al (2015) Fear of Falling in People With Chronic Stroke. *The American Journal of Occupational Therapy*. 69:6903350020p1-6903350020p5.
13. Denissen S, Staring W, Kunkel D et al (2019) Interventions for preventing falls in people after stroke. *Cochrane Database of Systematic Reviews*.
14. Dean CM, Ada L, Bampton J et al (2010) Treadmill walking with body weight support in subacute non-ambulatory stroke improves walking capacity more than overground walking: a randomised trial. *Journal of physiotherapy*. 56:97-103.
15. Mansfield A, Aquilino A, Danells CJ et al (2018) Does perturbation-based balance training prevent falls among individuals with chronic stroke? A randomised controlled trial. *BMJ open*. 8:e021510.
16. Lau RW, Yip SP, Pang MY (2012) Whole-body vibration has no effect on neuromotor function and falls in chronic stroke. *Medicine and science in sports and exercise*. 44:1409-1418.
17. Pang MYC, Yang L, Ouyang H et al (2018) Dual-task exercise reduces cognitive-motor interference in walking and falls after stroke: a randomized controlled study. *Stroke*. 49:2990-2998.
18. World Health Organization, *WHO guidelines on physical activity and sedentary behaviour*. . 2020: Geneva: World Health Organization; 2020. Licence: CC BY-NC-SA 3.0 IGO. <https://www.who.int/publications/i/item/9789240015128>.
19. Marsden DL, Dunn A, Callister R et al (2013) Characteristics of exercise training interventions to improve cardiorespiratory fitness after stroke: a systematic review with meta-analysis. *Neurorehabilitation and neural repair*. 27:775-788.
20. D'Isabella NT, Shkredova DA, Richardson JA et al (2017) Effects of exercise on cardiovascular risk factors following stroke or transient ischemic attack: a systematic review and meta-analysis. *Clinical Rehabilitation*. 31:1561-1572.
21. Eng JJ, Reime B (2014) Exercise for depressive symptoms in stroke patients: a systematic review and meta-analysis. *Clinical Rehabilitation*. 28:731-739.
22. Saunders DH, Sanderson M, Hayes S et al (2020) Physical fitness training for stroke patients. *Cochrane Database Syst Rev*. 3:Cd003316.
23. Collins M, Clifton E, Van Wijck F et al (2018) Cost-effectiveness of physical fitness training for stroke survivors. *Journal of the Royal College of Physicians of Edinburgh*. 48:62-8.

## Recommendations for Working Group 4: Exercise and Falls

**Recommendation 6: We recommend that older adults after sustaining a hip fracture should be offered an individualized and progressive exercise programme aimed at improving mobility (i.e. standing up, balance, walking, climbing stairs) as a fall prevention strategy. GRADE: 1B**

**Recommendation 7: We conditionally recommend that such programmes for older adults after a hip fracture are best commenced in hospitals and continued in the community. GRADE: 2C (In-patients) & 1A (Community)**

| <b>Population:</b>             | Older adults                                                                               | <i>Objective: Should mobility interventions versus no additional mobility interventions be used in adults after hip fracture?</i>                                  |                                                                                                                                                                                                                                                                                                                                                                                                                                                                                                                                                                                                                                                                                                                                                                                                                                                                                                                               |                                         |
|--------------------------------|--------------------------------------------------------------------------------------------|--------------------------------------------------------------------------------------------------------------------------------------------------------------------|-------------------------------------------------------------------------------------------------------------------------------------------------------------------------------------------------------------------------------------------------------------------------------------------------------------------------------------------------------------------------------------------------------------------------------------------------------------------------------------------------------------------------------------------------------------------------------------------------------------------------------------------------------------------------------------------------------------------------------------------------------------------------------------------------------------------------------------------------------------------------------------------------------------------------------|-----------------------------------------|
| <b>Intervention:</b>           | Exercise to improve mobility after hip fracture surgery, (trials recording falls outcomes) |                                                                                                                                                                    |                                                                                                                                                                                                                                                                                                                                                                                                                                                                                                                                                                                                                                                                                                                                                                                                                                                                                                                               |                                         |
| <b>Comparison:</b>             | Usual care                                                                                 |                                                                                                                                                                    |                                                                                                                                                                                                                                                                                                                                                                                                                                                                                                                                                                                                                                                                                                                                                                                                                                                                                                                               |                                         |
| <b>Main outcomes:</b>          | Falls                                                                                      |                                                                                                                                                                    |                                                                                                                                                                                                                                                                                                                                                                                                                                                                                                                                                                                                                                                                                                                                                                                                                                                                                                                               |                                         |
| <b>Setting:</b>                | In hospital or community                                                                   |                                                                                                                                                                    |                                                                                                                                                                                                                                                                                                                                                                                                                                                                                                                                                                                                                                                                                                                                                                                                                                                                                                                               |                                         |
| <b>Perspective:</b>            | International guidelines: clinicians, aged care managers and policy makers                 |                                                                                                                                                                    |                                                                                                                                                                                                                                                                                                                                                                                                                                                                                                                                                                                                                                                                                                                                                                                                                                                                                                                               |                                         |
| Decision Domain                |                                                                                            | Judgements                                                                                                                                                         | Research Evidence                                                                                                                                                                                                                                                                                                                                                                                                                                                                                                                                                                                                                                                                                                                                                                                                                                                                                                             | Additional Considerations /Explanations |
| <b>Priority of the Problem</b> | Is the problem a priority?                                                                 | <ul style="list-style-type: none"> <li>○ No</li> <li>○ Probably no</li> <li>○ Uncertain</li> <li>○ Probably yes</li> <li>● <b>Yes</b></li> <li>○ Varies</li> </ul> | The global call to action to improve the care of people with fragility fractures identified the need to urgently improve acute and post-acute care following fragility fracture, plus secondary prevention to prevent further fractures [1]. Worldwide, an estimated 1.26 million hip fractures occurred in adults in 1990, with predictions of numbers rising to 6.26 million by the year 2050 [2] This together with the generally unfavourable outcome in survivors, many of whom end up more dependent and move into residential care, means that the burden on society from hip fractures is immense and increasing [3] Although surgery is generally successful, few people recover fully from their hip fracture [3]. Most survivors fail to regain their former levels of mobility and activity, many become more dependent, and 10 to 60% of survivors will be unable to return to their previous residence [4] [5]. |                                         |
|                                |                                                                                            |                                                                                                                                                                    |                                                                                                                                                                                                                                                                                                                                                                                                                                                                                                                                                                                                                                                                                                                                                                                                                                                                                                                               |                                         |

|                                                 |                                                                                                                                              |                                                                                                                                                                                                                                                                                                         |                                                              |                            |                                          |                                                                                                               |
|-------------------------------------------------|----------------------------------------------------------------------------------------------------------------------------------------------|---------------------------------------------------------------------------------------------------------------------------------------------------------------------------------------------------------------------------------------------------------------------------------------------------------|--------------------------------------------------------------|----------------------------|------------------------------------------|---------------------------------------------------------------------------------------------------------------|
| Benefits and harms<br>(see below)               | Is there important uncertainty or variability in how much patients, researchers, clinicians and stake holders value the main outcomes?       | <ul style="list-style-type: none"> <li>○ Important uncertainty or variability</li> <li>○ Possibly important uncertainty or variability</li> <li>○ Probably no important uncertainty of variability</li> <li>● <b>No important uncertainty of variability</b></li> <li>○ No known undesirable</li> </ul> | <b>Relative importance of the main outcomes of interest:</b> |                            |                                          | Not formally assessed. It is assumed that most people place a high value on falls and fall-injury prevention. |
|                                                 |                                                                                                                                              |                                                                                                                                                                                                                                                                                                         | <b>Outcome</b>                                               | <b>Relative Importance</b> | <b>Certainty of the evidence (GRADE)</b> |                                                                                                               |
|                                                 |                                                                                                                                              |                                                                                                                                                                                                                                                                                                         | Rate of falls                                                | Critical                   | ⊕⊕⊕○<br>MODERATE                         |                                                                                                               |
|                                                 |                                                                                                                                              |                                                                                                                                                                                                                                                                                                         | Mobility                                                     | Critical                   | ⊕⊕○○<br>LOW                              |                                                                                                               |
|                                                 |                                                                                                                                              |                                                                                                                                                                                                                                                                                                         |                                                              |                            | ○○○○<br>MODERATE                         |                                                                                                               |
|                                                 |                                                                                                                                              |                                                                                                                                                                                                                                                                                                         |                                                              |                            | ○○○○<br>MODERATE                         |                                                                                                               |
|                                                 |                                                                                                                                              |                                                                                                                                                                                                                                                                                                         |                                                              |                            | ○○○○<br>MODERATE                         |                                                                                                               |
|                                                 |                                                                                                                                              |                                                                                                                                                                                                                                                                                                         |                                                              |                            | ○○○○<br>MODERATE                         |                                                                                                               |
|                                                 |                                                                                                                                              |                                                                                                                                                                                                                                                                                                         |                                                              |                            | ○○○○<br>MODERATE                         |                                                                                                               |
|                                                 |                                                                                                                                              |                                                                                                                                                                                                                                                                                                         |                                                              |                            | ○○○○<br>MODERATE                         |                                                                                                               |
| What is the overall certainty of this evidence? | <ul style="list-style-type: none"> <li>○ No studies</li> <li>○ Very low</li> <li>○ Low</li> <li>● <b>Moderate</b></li> <li>○ High</li> </ul> |                                                                                                                                                                                                                                                                                                         |                                                              |                            |                                          |                                                                                                               |

|                                                                                                                                                                                                                                           |                                            |                                                                                                                                                                                                                                                                                                                                                                                                                                                                                                                                                                                                                                                                                                                                                                                                                                                                                                                                                                                                                                                                                                                                                                                                                                                                                                                                              |
|-------------------------------------------------------------------------------------------------------------------------------------------------------------------------------------------------------------------------------------------|--------------------------------------------|----------------------------------------------------------------------------------------------------------------------------------------------------------------------------------------------------------------------------------------------------------------------------------------------------------------------------------------------------------------------------------------------------------------------------------------------------------------------------------------------------------------------------------------------------------------------------------------------------------------------------------------------------------------------------------------------------------------------------------------------------------------------------------------------------------------------------------------------------------------------------------------------------------------------------------------------------------------------------------------------------------------------------------------------------------------------------------------------------------------------------------------------------------------------------------------------------------------------------------------------------------------------------------------------------------------------------------------------|
| <p>□ How substantial are the desirable anticipated effects of the intervention? Large</p> <ul style="list-style-type: none"> <li>• <b>Moderate</b></li> <li>○ Small</li> <li>○ Trivial</li> <li>○ Varies</li> <li>○ Don't know</li> </ul> | <p><i>Summary of findings (GRADE):</i></p> | <p>According to the World Health Organization 2020 guidelines on physical activity and sedentary behaviour, [6] the health outcomes associated with participation in physical activity include all-cause and cause-specific mortality, adiposity, cognition, functional ability, mental health and incidence of health conditions including cancer, cardiovascular disease, type 2 diabetes and osteoporosis.</p> <p>Based on this range of benefits of exercise the World Health Organisation guidelines recommend that all older adults should undertake regular physical activity and that older adults should be as physically active as their functional ability allows, and adjust their level of effort for physical activity relative to their level of fitness.</p> <p>In a Cochrane Collaboration systematic review with 40 included studies measuring the effect of mobility interventions in adults after hip fracture (6 of which measured fall outcomes and were considered in this document), mobility interventions lead to a statistically significant, but not clinically significant, benefit to health-related quality of life, a small significant improvement in mobility and there was no evidence of an effect on mortality or fracture. Adverse events related to the intervention were few and not serious [7]</p> |
|-------------------------------------------------------------------------------------------------------------------------------------------------------------------------------------------------------------------------------------------|--------------------------------------------|----------------------------------------------------------------------------------------------------------------------------------------------------------------------------------------------------------------------------------------------------------------------------------------------------------------------------------------------------------------------------------------------------------------------------------------------------------------------------------------------------------------------------------------------------------------------------------------------------------------------------------------------------------------------------------------------------------------------------------------------------------------------------------------------------------------------------------------------------------------------------------------------------------------------------------------------------------------------------------------------------------------------------------------------------------------------------------------------------------------------------------------------------------------------------------------------------------------------------------------------------------------------------------------------------------------------------------------------|

|                                                                                                         |                                                                                                                                                                                                                                                       |                                                                                                                                                                                                                                                                                                             |                                                                                                                    |                                |                                                |
|---------------------------------------------------------------------------------------------------------|-------------------------------------------------------------------------------------------------------------------------------------------------------------------------------------------------------------------------------------------------------|-------------------------------------------------------------------------------------------------------------------------------------------------------------------------------------------------------------------------------------------------------------------------------------------------------------|--------------------------------------------------------------------------------------------------------------------|--------------------------------|------------------------------------------------|
|                                                                                                         |                                                                                                                                                                                                                                                       |                                                                                                                                                                                                                                                                                                             | Some qualitative research reports people place high value on avoiding pain and loss of mobility with hip fracture. |                                |                                                |
|                                                                                                         |                                                                                                                                                                                                                                                       | <b>Outcome</b>                                                                                                                                                                                                                                                                                              | <b>With mobility intervention</b>                                                                                  | <b>№ of patients (studies)</b> | <b>Effect<br/>Relative / Absolute (95% CI)</b> |
|                                                                                                         |                                                                                                                                                                                                                                                       | Falls rate (inpatient and post hospital combined)                                                                                                                                                                                                                                                           | The mean was 0.19 lower (0.32 lower to 0.03 lower)                                                                 |                                | RR: 0.81 (0.68-0.97)                           |
| How substantial are the undesirable anticipated effects of the intervention?                            | <ul style="list-style-type: none"> <li>• <b>Trivial</b></li> <li>○ Small</li> <li>○ Moderate</li> <li>○ Large</li> <li>○ Varies</li> <li>○ Don't know</li> </ul>                                                                                      | Mobility – overall analysis<br>Continuous observed outcomes (a higher score indicates better mobility)<br>[(follow-up: range 5 days to 4 months)]                                                                                                                                                           | 0.39 standard deviations higher (0.08-0.70 higher)                                                                 | 633 (11)                       | SMD: 0.39 (0.08-0.70)                          |
| Does the balance between desirable effects and undesirable effects favour the option of the comparison? | <ul style="list-style-type: none"> <li>○ Favours the option</li> <li>• <b>Probably favours the option</b></li> <li>○ Does not favour either</li> <li>○ Probably favours the comparison</li> <li>○ Favours the comparison</li> <li>○ Varies</li> </ul> | Comments:<br>Based on Cohen's effect sizes, mobility strategies may cause a moderate increase in mobility compared with control (SMD 0.39).<br>Types of intervention in included trials: gait, balance and functional exercise: 8 studies; resistance exercise: 2 studies; electrical stimulation: 1 study. |                                                                                                                    |                                |                                                |



|                                                                  |                                                                                                                                                                                    |                                                                                                                                                                    |                                                                                                                                                                                                                                                                                                                                                                                                                                                                                                                                                                                                                                                                                                                                                                                                                                                                                                                                                                                                                                                           |                                                                                                                                                                                                                                                               |
|------------------------------------------------------------------|------------------------------------------------------------------------------------------------------------------------------------------------------------------------------------|--------------------------------------------------------------------------------------------------------------------------------------------------------------------|-----------------------------------------------------------------------------------------------------------------------------------------------------------------------------------------------------------------------------------------------------------------------------------------------------------------------------------------------------------------------------------------------------------------------------------------------------------------------------------------------------------------------------------------------------------------------------------------------------------------------------------------------------------------------------------------------------------------------------------------------------------------------------------------------------------------------------------------------------------------------------------------------------------------------------------------------------------------------------------------------------------------------------------------------------------|---------------------------------------------------------------------------------------------------------------------------------------------------------------------------------------------------------------------------------------------------------------|
| <p style="text-align: center;"><b>Values and preferences</b></p> | <p>Is there similarity about how much patients, researchers, clinicians and stake holders value the main Outcomes? Also include adverse effects and burden of the intervention</p> | <ul style="list-style-type: none"> <li>○ No</li> <li>○ Probably no</li> <li>● <b>Uncertain</b></li> <li>○ Probably yes</li> <li>○ Yes</li> <li>○ Varies</li> </ul> |                                                                                                                                                                                                                                                                                                                                                                                                                                                                                                                                                                                                                                                                                                                                                                                                                                                                                                                                                                                                                                                           |                                                                                                                                                                                                                                                               |
| <p style="text-align: center;"><b>Resources</b></p>              | <p>What is the certainty of the evidence of resources requirements (costs)?</p>                                                                                                    | <ul style="list-style-type: none"> <li>○ No studies</li> <li>○ Very low</li> <li>● <b>Low</b></li> <li>○ Moderate</li> <li>○ High</li> </ul>                       | <p>Two of the 40 included studies explored the cost of healthcare post hip fracture [8, 9] however neither reported the intervention costs separately. Taraldsen [8] reported health care costs from the broad healthcare perspective (EUR 26219 for intervention group, for exercise program twice/week for ten weeks, 4 mths after hip fracture, c.f. EUR 25976 for the usual care control group. Williams [9] reported the cost of the intervention (six additional home-based exercise sessions), health services and social services from a public sector perspective, with the intervention group cost of GBP 149,243 compared with GBP 105,243 in the control group.</p> <p>Economic modelling for a public health program of fall prevention [10], conducted in community dwelling older people who were not specifically post hip fracture, found that the cost was \$1232.89, however this is likely to underestimate costs of delivery for the intervention and for this population it is likely to require delivery by a physiotherapist.</p> | <p>The intervention costs per person are relatively small compared to the costs associated with reduced mobility (e.g. length of stay, allied health, community services). The intervention costs per person are likely to save healthcare costs overall.</p> |

|                                                                               |                                                                                                                                                                                                                                                       |                                                                                                                                                                                                                                                                                                                                                                                                                                                                        |                                                                                                  |
|-------------------------------------------------------------------------------|-------------------------------------------------------------------------------------------------------------------------------------------------------------------------------------------------------------------------------------------------------|------------------------------------------------------------------------------------------------------------------------------------------------------------------------------------------------------------------------------------------------------------------------------------------------------------------------------------------------------------------------------------------------------------------------------------------------------------------------|--------------------------------------------------------------------------------------------------|
| <p>Does the cost effectiveness favour the intervention or the comparison?</p> | <ul style="list-style-type: none"> <li>○ Favours the option</li> <li>○ Probably favours the option</li> <li>○ Does not favour either</li> <li>○ Probably favours the comparison</li> <li>○ Favours the comparison</li> <li>● <b>Varies</b></li> </ul> | <p>In the systematic review, two studies evaluated cost effectiveness.</p> <p>In Taraldsen 2019 [8], the probability that the intervention (additional 20 sessions over 10 weeks of structured, home exercise targeting gait and balance) was cost-effective was below 39% for any ICER ceiling ratio below 150 000 EUR per QALY gained.</p> <p>Williams 2016 [9] did not conduct cost-effectiveness analysis due to the lack of between-group difference in QALY.</p> | <p>The cost-effectiveness is strongly driven by the effectiveness of the individual program.</p> |
|-------------------------------------------------------------------------------|-------------------------------------------------------------------------------------------------------------------------------------------------------------------------------------------------------------------------------------------------------|------------------------------------------------------------------------------------------------------------------------------------------------------------------------------------------------------------------------------------------------------------------------------------------------------------------------------------------------------------------------------------------------------------------------------------------------------------------------|--------------------------------------------------------------------------------------------------|

|               |                                               |                                                                                                                                                                                          |  |                                                                                                                                                                                                                                                                                                              |
|---------------|-----------------------------------------------|------------------------------------------------------------------------------------------------------------------------------------------------------------------------------------------|--|--------------------------------------------------------------------------------------------------------------------------------------------------------------------------------------------------------------------------------------------------------------------------------------------------------------|
| Equity        | What would be the impact on health equity?    | <ul style="list-style-type: none"> <li>○ Increased</li> <li>○ Probably increased</li> <li>○ Uncertain</li> <li>○ Probably reduced</li> <li>○ Reduced</li> <li>● <b>Varies</b></li> </ul> |  | It is assumed that the effects on equity are likely to vary. In systems where access to post-hospital intervention programs are possible through public funding it may decrease inequities by improving falls outcomes in adults that have not previously had appropriate access to effective interventions. |
| Acceptability | Is the option acceptable to key stakeholders? | <ul style="list-style-type: none"> <li>○ No</li> <li>○ Probably no</li> <li>○ Uncertain</li> <li>○ Probably yes</li> <li>○ Yes</li> <li>● <b>Varies</b></li> </ul>                       |  | It is assumed that the acceptability of an exercise program will vary between different patients, programs and settings.                                                                                                                                                                                     |

|             |                                            |                                                                                                                                                                    |  |                                                                                                                                                         |
|-------------|--------------------------------------------|--------------------------------------------------------------------------------------------------------------------------------------------------------------------|--|---------------------------------------------------------------------------------------------------------------------------------------------------------|
| Feasibility | Is the intervention feasible to implement? | <ul style="list-style-type: none"> <li>○ No</li> <li>○ Probably no</li> <li>○ Uncertain</li> <li>○ Probably yes</li> <li>○ Yes</li> <li>● <b>Varies</b></li> </ul> |  | It is assumed that the ability of hospitals and community rehabilitation providers to fund such programs will vary between countries and jurisdictions. |
|-------------|--------------------------------------------|--------------------------------------------------------------------------------------------------------------------------------------------------------------------|--|---------------------------------------------------------------------------------------------------------------------------------------------------------|

**Should \_\_\_ be recommended for older adults to prevent and manage falls?**

| Type of recommendation        | Strong recommendation against the intervention<br>○                                                                                                                                                                                                                                                                                                                                                                                                                                                                                                                                                                                                                                                                                                                                                           | Weak recommendation against the intervention<br>○ | Conditional recommendation for either the intervention or the comparison<br>○ | Weak recommendation for the intervention<br>● | Strong recommendation for the intervention<br>○ |
|-------------------------------|---------------------------------------------------------------------------------------------------------------------------------------------------------------------------------------------------------------------------------------------------------------------------------------------------------------------------------------------------------------------------------------------------------------------------------------------------------------------------------------------------------------------------------------------------------------------------------------------------------------------------------------------------------------------------------------------------------------------------------------------------------------------------------------------------------------|---------------------------------------------------|-------------------------------------------------------------------------------|-----------------------------------------------|-------------------------------------------------|
| Recommendation                | <p>Recommendation 6: We recommend that older adults after sustaining a hip fracture should be offered an individualised and progressive exercise programme aimed at improving mobility (i.e. standing up, balance, walking, climbing stairs) as a fall prevention strategy. GRADE 1B.</p> <p>Recommendation 7: We conditionally recommend that such programmes for older adults after a hip fracture are best commenced in hospitals and continued in the community. GRADE 2C (In-patients) &amp; 1A (Community)</p>                                                                                                                                                                                                                                                                                          |                                                   |                                                                               |                                               |                                                 |
| Justification                 | <p>The strength of evidence for exercise in preventing falls in older people post hip fracture is moderate. This recommendation places a relatively high value on preventing falls in this population. This value, plus additional benefits of exercise (see World Health Organisation guidelines), and minimal harms contribute to the justification for a strong positive recommendation.</p> <p>The components of effective fall prevention trials in the community [11] inform the consensus-based recommendations.</p>                                                                                                                                                                                                                                                                                   |                                                   |                                                                               |                                               |                                                 |
| Subgroup considerations       | <p>There is a lack of evidence of the effectiveness of exercise specifically in people post-hip fracture with cognitive impairment. Only two studies that measured fall outcomes included participants with cognitive impairment one trial where all 18 participants were aged &gt;90 [12], and another where 54 of the 160 participants had Cognitive impairment with ≥3 adjusted errors on the Short Portable Mental Status Questionnaire [13]. Combining the results of these two studies provided no evidence of an effect of intervention on falls and the certainty of the evidence was assessed as low, using GRADE. Despite uncertainty regarding whether exercise reduces falls in older people with cognitive impairment, the wider benefits of exercise to this population must be considered.</p> |                                                   |                                                                               |                                               |                                                 |
| Implementation considerations | <p>The cost-effectiveness of any program is strongly influenced by the effectiveness of the program.</p> <p>A training program will be required for therapists/exercise providers to ensure they have the expertise in exercise prescription for people following hip fracture.</p> <p>Systems will be required to make affordable exercise options widely available to people post hip fracture.</p> <p>Intervention programs are likely to require specific tailoring and motivational strategies to keep participants post hip fracture engaged in exercise for sufficient dose to see falls prevention effects.</p> <p>Effectiveness of the intervention will drive the cost-effectiveness of the program.</p>                                                                                            |                                                   |                                                                               |                                               |                                                 |

|                           |                                                                                                                                                                                                                                                                                                                                                                                                                                                                                                                                                                                                                                                                                                                                                                                                                                                                                                                                                                                                                       |
|---------------------------|-----------------------------------------------------------------------------------------------------------------------------------------------------------------------------------------------------------------------------------------------------------------------------------------------------------------------------------------------------------------------------------------------------------------------------------------------------------------------------------------------------------------------------------------------------------------------------------------------------------------------------------------------------------------------------------------------------------------------------------------------------------------------------------------------------------------------------------------------------------------------------------------------------------------------------------------------------------------------------------------------------------------------|
| Monitoring and evaluation | Falls and fall-related injuries should be continuously monitored and evaluated over time with appropriate statistical techniques. The amount and type of physical activity undertaken should also be monitored.                                                                                                                                                                                                                                                                                                                                                                                                                                                                                                                                                                                                                                                                                                                                                                                                       |
| Research Priorities       | <ul style="list-style-type: none"> <li>• Sufficiently powered, preferably multi-centred, high quality randomised controlled trials are needed.</li> <li>• Research should focus on interventions that are likely to have a beneficial overall, long-term impact; thus, trials should have long-term (one year or more) and comprehensive follow up including the collection of validated and patient-orientated outcome measures, and economic outcomes.</li> <li>• Research is needed to determine the relative impact of type, dose and location of exercise that is best to reduce falls and the level of supervision required to be optimally effective</li> <li>• Trials need to be conducted in a range of countries with differing health care and community support systems and funding models.</li> <li>• Effect of exercise interventions on fall rates in people cognitive impairment</li> <li>• Cost effectiveness of fall prevention exercise</li> <li>• Effect of exercise on adverse events</li> </ul> |

## References

1. Dreinhofer KE, Mitchell PJ, Begue T et al (2018) A global call to action to improve the care of people with fragility fractures. *Injury*. 49:1393-1397.
2. Curtis EM, Moon RJ, Harvey NC et al (2017) The impact of fragility fracture and approaches to osteoporosis risk assessment worldwide. *Bone*. 104:29-38.
3. Dyer SM, Crotty M, Fairhall N et al (2016) A critical review of the long-term disability outcomes following hip fracture. *BMC Geriatr*. 16:158.
4. Magaziner J, Hawkes W, Hebel JR et al (2000) Recovery from hip fracture in eight areas of function. *J Gerontol A Biol Sci Med Sci*. 55:M498-507.
5. Royal College of Physicians, *National Hip Fracture Database annual report 2019*. 2019, RCP: London.
6. World Health Organization, *WHO guidelines on physical activity and sedentary behaviour*. 2020: Geneva.
7. Fairhall N, Mak JCS, Diong J et al (2021) Interventions for improving mobility after hip fracture surgery in adults Cochrane Database of Systematic Reviews. (Under Review).
8. Taraldsen K, Thingstad P, Dohl O et al (2019) Short and long-term clinical effectiveness and cost-effectiveness of a late-phase community-based balance and gait exercise program following hip fracture. The EVA-Hip Randomised Controlled Trial. *PLoS One*. 14:e0224971.
9. Williams NH, Roberts JL, Din NU et al (2016) Fracture in the Elderly Multidisciplinary Rehabilitation (FEMuR): a phase II randomised feasibility study of a multidisciplinary rehabilitation package following hip fracture. *BMJ Open*. 6:e012422.
10. Farag I, Howard K, Ferreira ML et al (2015) Economic modelling of a public health programme for fall prevention. *Age Ageing*. 44:409-14.
11. Sherrington C, Michaleff ZA, Fairhall N et al (2017) Exercise to prevent falls in older adults: an updated systematic review and meta-analysis. *Br J Sports Med*. 51:1750-1758.
12. Ohoka T, Urabe Y, Shirakawa T (2015) Therapeutic exercises for proximal femoral fracture of super-aged patients: effect of walking assistance using body weight-supported treadmill training *Physiotherapy*. 101:e1124-5.
13. Moseley AM, Sherrington C, Lord SR et al (2009) Mobility training after hip fracture: a randomised controlled trial. *Age Ageing*. 38:74-80.

## Recommendations for Working Group 4: Exercise and Falls

**Recommendation 8: We recommend that community-dwelling older adults with cognitive impairment (mild cognitive impairment and mild to moderate dementia) should be offered an exercise programme to prevent falls. GRADE: 1B**

| <b>Population:</b>             | Older people                                                                                                                                                                     | <i>Objective: Should exercise versus usual care be used to reduce falls in older people with cognitive impairment?</i>                                             |                                                                                                                                                                                                                                                                                                                                                                                                                                                                                                                                                                                                         |                                         |
|--------------------------------|----------------------------------------------------------------------------------------------------------------------------------------------------------------------------------|--------------------------------------------------------------------------------------------------------------------------------------------------------------------|---------------------------------------------------------------------------------------------------------------------------------------------------------------------------------------------------------------------------------------------------------------------------------------------------------------------------------------------------------------------------------------------------------------------------------------------------------------------------------------------------------------------------------------------------------------------------------------------------------|-----------------------------------------|
| <b>Intervention:</b>           | Exercise (as a stand-alone intervention) as a falls prevention activity or as a way to improve physical function and balance (trials recording falls as adverse events included) |                                                                                                                                                                    |                                                                                                                                                                                                                                                                                                                                                                                                                                                                                                                                                                                                         |                                         |
| <b>Comparison:</b>             | Usual care, seated exercise or no exercise (eg. social activity, falls prevention advice)                                                                                        |                                                                                                                                                                    |                                                                                                                                                                                                                                                                                                                                                                                                                                                                                                                                                                                                         |                                         |
| <b>Main outcomes:</b>          | Falls                                                                                                                                                                            |                                                                                                                                                                    |                                                                                                                                                                                                                                                                                                                                                                                                                                                                                                                                                                                                         |                                         |
| <b>Setting:</b>                | Community and residential aged care                                                                                                                                              |                                                                                                                                                                    |                                                                                                                                                                                                                                                                                                                                                                                                                                                                                                                                                                                                         |                                         |
| <b>Perspective:</b>            | International guidelines: community, residents, clinicians, aged care managers and policy makers                                                                                 |                                                                                                                                                                    |                                                                                                                                                                                                                                                                                                                                                                                                                                                                                                                                                                                                         |                                         |
| Decision Domain                |                                                                                                                                                                                  | Judgements                                                                                                                                                         | Research Evidence                                                                                                                                                                                                                                                                                                                                                                                                                                                                                                                                                                                       | Additional Considerations /Explanations |
| <b>Priority of the Problem</b> | Is the problem a priority?                                                                                                                                                       | <ul style="list-style-type: none"> <li>○ No</li> <li>○ Probably no</li> <li>○ Uncertain</li> <li>○ Probably yes</li> <li>● <b>Yes</b></li> <li>○ Varies</li> </ul> | Overall, the incidence of falls in older people with CI/dementia is more than twice that of cognitively intact older people [1-3] and the incidence of multiple/recurrent falls is also doubled [4]. Injurious falls are more common, and the risk of hip fracture is increased three to four-fold [5-8]. The risk of institutionalization and death are also increased after a fall in this population, particularly after an injurious fall [5, 7, 9-12]. Few people return to their previous level of function after hip fracture and having CI/dementia is associated with poorer outcomes [13-16]. |                                         |

|                                                 |                                                                                                                                                                                                                                                                                                                                    |                                                                                                                                                                                                                                                                                                         |                                                              |                            |                                          |                                                                                                               |
|-------------------------------------------------|------------------------------------------------------------------------------------------------------------------------------------------------------------------------------------------------------------------------------------------------------------------------------------------------------------------------------------|---------------------------------------------------------------------------------------------------------------------------------------------------------------------------------------------------------------------------------------------------------------------------------------------------------|--------------------------------------------------------------|----------------------------|------------------------------------------|---------------------------------------------------------------------------------------------------------------|
| Benefits and harms<br>(see below)               | Is there important uncertainty or variability in how much patients, researchers, clinicians and stake holders value the main outcomes?                                                                                                                                                                                             | <ul style="list-style-type: none"> <li>○ Important uncertainty or variability</li> <li>○ Possibly important uncertainty or variability</li> <li>○ Probably no important uncertainty of variability</li> <li>● <b>No important uncertainty of variability</b></li> <li>○ No known undesirable</li> </ul> | <b>Relative importance of the main outcomes of interest:</b> |                            |                                          | Not formally assessed. It is assumed that most people place a high value on falls and fall-injury prevention. |
|                                                 |                                                                                                                                                                                                                                                                                                                                    |                                                                                                                                                                                                                                                                                                         | <b>Outcome</b>                                               | <b>Relative Importance</b> | <b>Certainty of the evidence (GRADE)</b> |                                                                                                               |
|                                                 |                                                                                                                                                                                                                                                                                                                                    |                                                                                                                                                                                                                                                                                                         | Exercise (overall)                                           | Critical                   | ⊕⊕⊕○<br>MODERATE                         |                                                                                                               |
|                                                 |                                                                                                                                                                                                                                                                                                                                    |                                                                                                                                                                                                                                                                                                         | Community                                                    | Critical                   | ⊕⊕⊕○<br>MODERATE                         |                                                                                                               |
|                                                 |                                                                                                                                                                                                                                                                                                                                    |                                                                                                                                                                                                                                                                                                         | Residential Care                                             | Critical                   | ⊕⊕⊕⊕<br>HIGH                             |                                                                                                               |
|                                                 |                                                                                                                                                                                                                                                                                                                                    |                                                                                                                                                                                                                                                                                                         |                                                              |                            | ○○○○<br>MODERATE                         |                                                                                                               |
|                                                 |                                                                                                                                                                                                                                                                                                                                    |                                                                                                                                                                                                                                                                                                         |                                                              |                            | ○○○○<br>MODERATE                         |                                                                                                               |
|                                                 |                                                                                                                                                                                                                                                                                                                                    |                                                                                                                                                                                                                                                                                                         |                                                              |                            | ○○○○<br>MODERATE                         |                                                                                                               |
|                                                 |                                                                                                                                                                                                                                                                                                                                    |                                                                                                                                                                                                                                                                                                         |                                                              |                            | ○○○○<br>MODERATE                         |                                                                                                               |
|                                                 |                                                                                                                                                                                                                                                                                                                                    |                                                                                                                                                                                                                                                                                                         |                                                              |                            | ○○○○<br>MODERATE                         |                                                                                                               |
| What is the overall certainty of this evidence? | <p>Community</p> <ul style="list-style-type: none"> <li>○ No studies</li> <li>○ Very low</li> <li>○ Low</li> <li>● <b>Moderate</b></li> <li>○ High</li> </ul> <p>Residential Care</p> <ul style="list-style-type: none"> <li>○ No studies</li> <li>○ Very low</li> <li>○ Low</li> <li>○ Moderate</li> <li>● <b>High</b></li> </ul> |                                                                                                                                                                                                                                                                                                         |                                                              |                            |                                          |                                                                                                               |



|                                                                                                                |                                                                                                                                                                                                                                                       |                                               |                                                  |                                                                 |                                                                                                                                                                                                                                                                                                                                                                                                                                                                                                                                                                                                                                                                                                                                                                                                                                                                                                                                                                                                                                                                                                                                                                                                                                                             |
|----------------------------------------------------------------------------------------------------------------|-------------------------------------------------------------------------------------------------------------------------------------------------------------------------------------------------------------------------------------------------------|-----------------------------------------------|--------------------------------------------------|-----------------------------------------------------------------|-------------------------------------------------------------------------------------------------------------------------------------------------------------------------------------------------------------------------------------------------------------------------------------------------------------------------------------------------------------------------------------------------------------------------------------------------------------------------------------------------------------------------------------------------------------------------------------------------------------------------------------------------------------------------------------------------------------------------------------------------------------------------------------------------------------------------------------------------------------------------------------------------------------------------------------------------------------------------------------------------------------------------------------------------------------------------------------------------------------------------------------------------------------------------------------------------------------------------------------------------------------|
| <p>How substantial are the desirable anticipated effects of the intervention?</p>                              | <ul style="list-style-type: none"> <li>• <b>Large</b></li> <li>○ Moderate</li> <li>○ Small</li> <li>○ Trivial</li> <li>○ Varies</li> <li>○ Don't know</li> </ul>                                                                                      | <p><i>Summary of findings (GRADE):</i></p>    |                                                  |                                                                 | <p>Test for subgroup differences: <math>\text{Chi}^2 = 2.12</math>, <math>\text{df} = 1</math> (<math>P = 0.15</math>), <math>I^2 = 53\%</math> ; subgroup analyses also conducted excluding 2 studies ([17] (n=20) , [18](n=110)) where the setting was unclear or where participants from both community and residential care settings were included.</p> <p><b>Adverse events-- undesirable effects</b></p> <p>Out of 13 studies included in our overall meta-analysis, 10 studies reported on adverse events with a varying level of detail. Three studies did not report adverse events [17-19].</p> <p><i>Studies that recorded falls as adverse events / complications</i></p> <p>Four studies, two in the community subgroup [20, 21] and two in the residential care subgroup [22, 23] considered falls as adverse events or complications.</p> <p><u>Community setting</u></p> <p>Lamb (2018) [20] reported 25 adverse events occurred (eight were possibly related, nine probably related, and eight definitely related) and four serious related adverse events (one hospital admission for exercise induced angina, two injurious falls, and one case of substantially worsening hip pain) in the exercise arm and no reports in the usual</p> |
| <p>How substantial are the undesirable anticipated effects of the intervention?</p>                            | <ul style="list-style-type: none"> <li>• <b>Trivial</b></li> <li>○ Small</li> <li>○ Moderate</li> <li>○ Large</li> <li>○ Varies</li> <li>○ Don't know</li> </ul>                                                                                      | <p><b>Outcome</b></p>                         | <p><b>Nº of participants</b></p>                 | <p><b>Effect</b></p> <p><b>Relative / Absolute (95% CI)</b></p> |                                                                                                                                                                                                                                                                                                                                                                                                                                                                                                                                                                                                                                                                                                                                                                                                                                                                                                                                                                                                                                                                                                                                                                                                                                                             |
| <p>Does the balance between desirable effects and undesirable effects favour the option of the comparison?</p> | <ul style="list-style-type: none"> <li>• <b>Favours the option</b></li> <li>○ Probably favours the option</li> <li>○ Does not favour either</li> <li>○ Probably favours the comparison</li> <li>○ Favours the comparison</li> <li>○ Varies</li> </ul> | <p>Exercise (overall)<br/>Rate of falls</p>   | <p>1795<br/>(15 comparisons from 13 studies)</p> | <p>0.77<br/>(0.62-0.96)</p>                                     |                                                                                                                                                                                                                                                                                                                                                                                                                                                                                                                                                                                                                                                                                                                                                                                                                                                                                                                                                                                                                                                                                                                                                                                                                                                             |
|                                                                                                                |                                                                                                                                                                                                                                                       | <p>Community<br/>Rate of falls</p>            | <p>1220<br/>(9 comparisons in 7 studies)</p>     | <p>0.71<br/>(0.50-0.99)</p>                                     |                                                                                                                                                                                                                                                                                                                                                                                                                                                                                                                                                                                                                                                                                                                                                                                                                                                                                                                                                                                                                                                                                                                                                                                                                                                             |
|                                                                                                                |                                                                                                                                                                                                                                                       | <p>Residential<br/>Care<br/>Rate of falls</p> | <p>443<br/>(4 studies)</p>                       | <p>0.95<br/>(0.77-1.16)</p>                                     |                                                                                                                                                                                                                                                                                                                                                                                                                                                                                                                                                                                                                                                                                                                                                                                                                                                                                                                                                                                                                                                                                                                                                                                                                                                             |

|  |  |  |  |  |  |                                                                                                                                                                                                                                                                                                                                                                                                                                                                                                                                                                                                                                                                                                                                                                                                                                                                                                                                                                                                                                                                                                                                                                                |
|--|--|--|--|--|--|--------------------------------------------------------------------------------------------------------------------------------------------------------------------------------------------------------------------------------------------------------------------------------------------------------------------------------------------------------------------------------------------------------------------------------------------------------------------------------------------------------------------------------------------------------------------------------------------------------------------------------------------------------------------------------------------------------------------------------------------------------------------------------------------------------------------------------------------------------------------------------------------------------------------------------------------------------------------------------------------------------------------------------------------------------------------------------------------------------------------------------------------------------------------------------|
|  |  |  |  |  |  | <p>care arm. In the exercise arm an adverse event was reported by 23/329 participants (7.0%, 95% CI 4.7% to 10.3%) (note that the program included high intensity aerobic exercise, which might bring more adverse events).</p> <p>Pitkala 2013 [21]: Participants in the control group suffered the most falls per person-year (<math>P&lt;001</math>). The incidences of fractures or hospitalizations did not differ between groups.</p> <p><u>Residential care</u></p> <p>De Souto Barreto 2017 [22] reported less falls (adverse events) in the intervention.</p> <p>Rolland 2007 [23]: Deaths were related to the comorbidities, and none of the deaths were directly or indirectly attributable to an adverse effect of the exercise program.</p> <p>There were no significant group differences during the 12months between the exercise program group and the routine medical care group in observed total number of falls (139 vs 136), fractures (5 vs 2), or deaths (7 vs 8). No malaise or syncope was noted during the exercise sessions. During the study period, five falls occurred during the exercise session. One of them caused a wound of the scalp.</p> |
|--|--|--|--|--|--|--------------------------------------------------------------------------------------------------------------------------------------------------------------------------------------------------------------------------------------------------------------------------------------------------------------------------------------------------------------------------------------------------------------------------------------------------------------------------------------------------------------------------------------------------------------------------------------------------------------------------------------------------------------------------------------------------------------------------------------------------------------------------------------------------------------------------------------------------------------------------------------------------------------------------------------------------------------------------------------------------------------------------------------------------------------------------------------------------------------------------------------------------------------------------------|

|  |  |  |  |  |  |                                                                                                                                                                                                                                                                                                                                                                                                                                                                                                                                                                                                                                                                                                                                                                                                                                                                                                                                                                                                                                                                                                                                                               |
|--|--|--|--|--|--|---------------------------------------------------------------------------------------------------------------------------------------------------------------------------------------------------------------------------------------------------------------------------------------------------------------------------------------------------------------------------------------------------------------------------------------------------------------------------------------------------------------------------------------------------------------------------------------------------------------------------------------------------------------------------------------------------------------------------------------------------------------------------------------------------------------------------------------------------------------------------------------------------------------------------------------------------------------------------------------------------------------------------------------------------------------------------------------------------------------------------------------------------------------|
|  |  |  |  |  |  | <p><i>Studies that did not record falls as adverse events</i></p> <p>Goldberg 2019 [24]: There were 19 recorded adverse events. Five were related to the intervention but not serious, 12 were serious but not related, 2 were neither serious nor related to the intervention. They were all recorded in the active intervention groups, but were subject to ascertainment bias as these groups had much more contact with therapists.</p> <p>Nyman 2019 [25]: Tai Chi was found to be safe with no serious adverse events experienced in relation to practising Tai Chi in class or at home. No serious adverse events were related to participation in the trial.</p> <p>Suttanon 2013 [26]: There were no falls or other serious adverse events associated with performing the exercise programme.</p> <p>Taylor 2021 [27]: There were 4 falls associated with the intervention. One fall occurred while a participant was descending the stairs during an occupational therapy home assessment and 3 participants fell during an exercise session. There were no significant injuries associated with these falls. One participant sustained a small</p> |
|--|--|--|--|--|--|---------------------------------------------------------------------------------------------------------------------------------------------------------------------------------------------------------------------------------------------------------------------------------------------------------------------------------------------------------------------------------------------------------------------------------------------------------------------------------------------------------------------------------------------------------------------------------------------------------------------------------------------------------------------------------------------------------------------------------------------------------------------------------------------------------------------------------------------------------------------------------------------------------------------------------------------------------------------------------------------------------------------------------------------------------------------------------------------------------------------------------------------------------------|

|  |  |  |  |  |  |                                                                                                                                                                                                                                                                                                                                                                                                                                                                                                                        |
|--|--|--|--|--|--|------------------------------------------------------------------------------------------------------------------------------------------------------------------------------------------------------------------------------------------------------------------------------------------------------------------------------------------------------------------------------------------------------------------------------------------------------------------------------------------------------------------------|
|  |  |  |  |  |  | <p>skin tear attempting to complete a knee extension exercise in sitting. No other adverse events were reported.</p> <p>Toots 2019 [28]: All adverse events recorded during exercise sessions were minor or temporary</p> <p>Wesson 2013 [29]: No serious adverse events related to the intervention were reported during the study period. Minor complaints relating to stiffness, dizziness and mild joint pain (n=4; 36%) were reported by participants intermittently and exercises were adjusted accordingly.</p> |
|--|--|--|--|--|--|------------------------------------------------------------------------------------------------------------------------------------------------------------------------------------------------------------------------------------------------------------------------------------------------------------------------------------------------------------------------------------------------------------------------------------------------------------------------------------------------------------------------|

|                                                                  |                                                                                                                                                                                    |                                                                                                                                                                    |                                                                                                                                                                                                                                                                                                                                                                                                                                                                                                                                                                                                                                                                                                                                                                                                                                                                                                                                                                                                                                                                      |                                                                                                                                                                                                                                                                                                                                                                                                                                                                                                                                                                                                                                                                                                                                                                         |
|------------------------------------------------------------------|------------------------------------------------------------------------------------------------------------------------------------------------------------------------------------|--------------------------------------------------------------------------------------------------------------------------------------------------------------------|----------------------------------------------------------------------------------------------------------------------------------------------------------------------------------------------------------------------------------------------------------------------------------------------------------------------------------------------------------------------------------------------------------------------------------------------------------------------------------------------------------------------------------------------------------------------------------------------------------------------------------------------------------------------------------------------------------------------------------------------------------------------------------------------------------------------------------------------------------------------------------------------------------------------------------------------------------------------------------------------------------------------------------------------------------------------|-------------------------------------------------------------------------------------------------------------------------------------------------------------------------------------------------------------------------------------------------------------------------------------------------------------------------------------------------------------------------------------------------------------------------------------------------------------------------------------------------------------------------------------------------------------------------------------------------------------------------------------------------------------------------------------------------------------------------------------------------------------------------|
| <p style="text-align: center;"><b>Values and preferences</b></p> | <p>Is there similarity about how much patients, researchers, clinicians and stake holders value the main Outcomes? Also include adverse effects and burden of the intervention</p> | <ul style="list-style-type: none"> <li>○ No</li> <li>○ Probably no</li> <li>● <b>Uncertain</b></li> <li>○ Probably yes</li> <li>○ Yes</li> <li>○ Varies</li> </ul> |                                                                                                                                                                                                                                                                                                                                                                                                                                                                                                                                                                                                                                                                                                                                                                                                                                                                                                                                                                                                                                                                      |                                                                                                                                                                                                                                                                                                                                                                                                                                                                                                                                                                                                                                                                                                                                                                         |
| <p style="text-align: center;"><b>Resources</b></p>              | <p>What is the certainty of the evidence of resources requirements (costs)?</p>                                                                                                    | <ul style="list-style-type: none"> <li>○ No studies</li> <li>○ Very low</li> <li>○ Low</li> <li>○ Moderate</li> <li>○ High</li> <li>● <b>Varies</b></li> </ul>     | <p>Only two trials reported on resource use or costs.</p> <p>Pitkala (2013) [21] (community setting) reported costs for the three arms of their exercise RCT:</p> <ul style="list-style-type: none"> <li>- Control group US\$ 34,121 (\$24,559 to \$43,681)</li> <li>- Home exercise: US\$ 25,112 (\$17,642 to 32,581)</li> <li>- Group-based exercise: US\$22,066 (\$15,931 to \$28,199)</li> </ul> <p>The cost of health and social services for the patient-carer dyads (in US\$ per dyad per year) were significantly lower for the group-based exercise compared with the control group (p=0.03) but there was no statistically significant difference between the home-based group and the control group (p=0.13).</p> <p>Nyman (2019) [25](community setting) reported on the costs of:</p> <ul style="list-style-type: none"> <li>-the Tai Chi instructors – total cost : £26,995</li> <li>- the mean cost per intervention group dyad : £631, which was reportedly “markedly higher than dyads’ willingness to pay” (average (SD) £ 5.6 (2.8)) .</li> </ul> | <p>Only two studies to date reported costs of running an exercise intervention to prevent falls in people with cognitive impairment.</p> <p>The first study’s interventions [21] are not representative of other trials (eg. home exercise included a physiotherapist coming the participants’ homes twice a week for 12-months, hence the costs of the home program was higher than the group-based program).The group-based exercise intervention costs for this study were significantly smaller than for the control group. The cost of home-based exercise intervention in this study was not different from the control. The home-based program was more effective.</p> <p>The 2<sup>nd</sup> study [25] only reported on the cost of hiring the instructors.</p> |

|                                                                               |                                                                                                                                                                                                                                                                                                                                                     |                                                                                                  |
|-------------------------------------------------------------------------------|-----------------------------------------------------------------------------------------------------------------------------------------------------------------------------------------------------------------------------------------------------------------------------------------------------------------------------------------------------|--------------------------------------------------------------------------------------------------|
| <p>Does the cost effectiveness favour the intervention or the comparison?</p> | <ul style="list-style-type: none"> <li>○ Favours the option</li> <li>○ Probably favours the option</li> <li>○ Does not favour either</li> <li>○ Probably favours the comparison</li> <li>○ Favours the comparison</li> </ul> <p><b>Varies</b> There does not appear to be any research study that has reported ICER hence there is no evidence.</p> | <p>The cost-effectiveness is strongly driven by the effectiveness of the individual program.</p> |
|-------------------------------------------------------------------------------|-----------------------------------------------------------------------------------------------------------------------------------------------------------------------------------------------------------------------------------------------------------------------------------------------------------------------------------------------------|--------------------------------------------------------------------------------------------------|

|        |                                            |                                                                                                                                                                                          |                    |                                                                                                                                                                                                                                                                                                                                                                                                                                                                                                                                                                                                                                                                                                                                                                                                                                                    |
|--------|--------------------------------------------|------------------------------------------------------------------------------------------------------------------------------------------------------------------------------------------|--------------------|----------------------------------------------------------------------------------------------------------------------------------------------------------------------------------------------------------------------------------------------------------------------------------------------------------------------------------------------------------------------------------------------------------------------------------------------------------------------------------------------------------------------------------------------------------------------------------------------------------------------------------------------------------------------------------------------------------------------------------------------------------------------------------------------------------------------------------------------------|
| Equity | What would be the impact on health equity? | <ul style="list-style-type: none"> <li>○ Increased</li> <li>○ Probably increased</li> <li>○ Uncertain</li> <li>○ Probably reduced</li> <li>○ Reduced</li> <li>● <b>Varies</b></li> </ul> | No research found. | <p>It is assumed that effects on equity are likely to vary. In residential care where access is possible through public funding it may decrease inequities by improving falls outcomes in residents that have not previously had appropriate access to effective interventions. In residential care where public funding to deliver the intervention cannot be accessed, and funding is required, implementation may be greater in facilities with higher levels of private funding/staffing and inequities may increase. Similarly, in the community, access varies. Some areas have access to exercise programs to prevent falls, but in some instances, cognitive impairment is an exclusion criterion. In other areas, access to appropriate programs may be limited and/or costly, as well as having exclusions for cognitive impairment.</p> |
|--------|--------------------------------------------|------------------------------------------------------------------------------------------------------------------------------------------------------------------------------------------|--------------------|----------------------------------------------------------------------------------------------------------------------------------------------------------------------------------------------------------------------------------------------------------------------------------------------------------------------------------------------------------------------------------------------------------------------------------------------------------------------------------------------------------------------------------------------------------------------------------------------------------------------------------------------------------------------------------------------------------------------------------------------------------------------------------------------------------------------------------------------------|

|                                                         |                                                      |                                                                                                                                                                    |  |                                                                                                                                             |
|---------------------------------------------------------|------------------------------------------------------|--------------------------------------------------------------------------------------------------------------------------------------------------------------------|--|---------------------------------------------------------------------------------------------------------------------------------------------|
| <p style="text-align: center;"><b>Acceptability</b></p> | <p>Is the option acceptable to key stakeholders?</p> | <ul style="list-style-type: none"> <li>○ No</li> <li>○ Probably no</li> <li>○ Uncertain</li> <li>○ Probably yes</li> <li>○ Yes</li> <li>● <b>Varies</b></li> </ul> |  | <p>It is assumed that it is likely that acceptability of exercise may vary between individuals, their caregivers, settings and program.</p> |
|---------------------------------------------------------|------------------------------------------------------|--------------------------------------------------------------------------------------------------------------------------------------------------------------------|--|---------------------------------------------------------------------------------------------------------------------------------------------|



|             |                                            |                                                                                                                                                                    |                                                                                                                                                                                                                                                                                                                                                                                                                                                                                                                      |                                                                                                                                                                                                                                                                                                                                                                                                                                                                                                                                                                                                                                                                                                                                                                             |
|-------------|--------------------------------------------|--------------------------------------------------------------------------------------------------------------------------------------------------------------------|----------------------------------------------------------------------------------------------------------------------------------------------------------------------------------------------------------------------------------------------------------------------------------------------------------------------------------------------------------------------------------------------------------------------------------------------------------------------------------------------------------------------|-----------------------------------------------------------------------------------------------------------------------------------------------------------------------------------------------------------------------------------------------------------------------------------------------------------------------------------------------------------------------------------------------------------------------------------------------------------------------------------------------------------------------------------------------------------------------------------------------------------------------------------------------------------------------------------------------------------------------------------------------------------------------------|
| Feasibility | Is the intervention feasible to implement? | <ul style="list-style-type: none"> <li>○ No</li> <li>○ Probably no</li> <li>○ Uncertain</li> <li>○ Probably yes</li> <li>○ Yes</li> <li>● <b>Varies</b></li> </ul> | Realist review on exercise-based falls prevention programmes for older adults with cognitive impairment [30] reported that motivation to undertake the falls prevention interventions in this population was underpinned by two key elements: “perceived benefit” and “support”, from both the participants and carers point of view. “Benefits of exercise perceived by the carer or supporter for the person with dementia include: mood, behaviour, weight, flexibility, ageing, and enjoyment of everyday life.” | It is assumed that the ability for communities and residential care to implement exercise will vary between countries, settings, funding systems and staffing. Feasibility may also depend on the program to be implemented e.g. the successful FINALEX intervention [21] which involved 2h x2/week of home physiotherapy may be difficult to implement in many countries in the community. In contrast, a Tai-Chi intervention similar to that effectively delivered by Nyman [25], that is, once a week in class practice, supplemented by home practice and home behavioural change techniques might be easily implemented using existing community services. The group setting, low infrastructure and equipment requirements may also make it a low-cost intervention. |
|-------------|--------------------------------------------|--------------------------------------------------------------------------------------------------------------------------------------------------------------------|----------------------------------------------------------------------------------------------------------------------------------------------------------------------------------------------------------------------------------------------------------------------------------------------------------------------------------------------------------------------------------------------------------------------------------------------------------------------------------------------------------------------|-----------------------------------------------------------------------------------------------------------------------------------------------------------------------------------------------------------------------------------------------------------------------------------------------------------------------------------------------------------------------------------------------------------------------------------------------------------------------------------------------------------------------------------------------------------------------------------------------------------------------------------------------------------------------------------------------------------------------------------------------------------------------------|

**Should \_\_\_ be recommended for older adults to prevent and manage falls?**

| Type of recommendation | Strong recommendation against the intervention<br>○                                                                                                                                                                                                                                                                                                                                                                                                         | Weak recommendation against the intervention<br>○ | Conditional recommendation for either the intervention or the comparison<br>○ | Weak recommendation for the intervention<br>○ | Strong recommendation for the intervention<br>● |
|------------------------|-------------------------------------------------------------------------------------------------------------------------------------------------------------------------------------------------------------------------------------------------------------------------------------------------------------------------------------------------------------------------------------------------------------------------------------------------------------|---------------------------------------------------|-------------------------------------------------------------------------------|-----------------------------------------------|-------------------------------------------------|
| Recommendation         | Recommendation 8: We recommend that community-dwelling older adults with cognitive impairment (mild cognitive impairment and mild to moderate dementia) should be offered an exercise programme to prevent falls. GRADE: 1B                                                                                                                                                                                                                                 |                                                   |                                                                               |                                               |                                                 |
| Justification          | The certainty of evidence for exercise to prevent falls in older people with cognitive impairment living in the community is moderate. This recommendation places a relatively high value on preventing falls in this population. This value, plus additional benefits of exercise (see World Health Organization guidelines [31], perceptions of benefits by carers [30]) and minimal harms contribute to the justification for a positive recommendation. |                                                   |                                                                               |                                               |                                                 |

|                               |                                                                                                                                                                                                                                                                                                                                                                                                                                                                                                                                                                                                                                                                                                                                                                                                                                                                                                                                                                                                                                                                                                                                                                                                                                                                                      |
|-------------------------------|--------------------------------------------------------------------------------------------------------------------------------------------------------------------------------------------------------------------------------------------------------------------------------------------------------------------------------------------------------------------------------------------------------------------------------------------------------------------------------------------------------------------------------------------------------------------------------------------------------------------------------------------------------------------------------------------------------------------------------------------------------------------------------------------------------------------------------------------------------------------------------------------------------------------------------------------------------------------------------------------------------------------------------------------------------------------------------------------------------------------------------------------------------------------------------------------------------------------------------------------------------------------------------------|
| Subgroup considerations       | <p>Recommendations are made on the basis of subgroup analyses.</p> <p>While residents of care facilities tended to have lower cognitive ability (in 3 out of 4 studies scores for cognitive ability were lower than most scores reported in the cohorts from the community setting), there are many other factors that may differ between the two settings and the people residing in the two settings. The small number of studies prevents us from making recommendations with regards to effectiveness of falls prevention exercise relative to level of cognitive impairment.</p>                                                                                                                                                                                                                                                                                                                                                                                                                                                                                                                                                                                                                                                                                                |
| Implementation considerations | <p>The studies demonstrating the strongest fall prevention effects both included a strong balance component and involved 50 hours or more of exercise. However while one was home-based and involved two hours, twice weekly exercise supervised by a physiotherapist, for 12-months [21], the other was group-based tai-chi delivered once a week and supplemented with home-based practice. The differential modes of delivery (home vs. group, physiotherapist vs. instructor), frequency of delivery (once versus twice a week) prevent from providing specific recommendations. The study samples also differed: older people with Alzheimer’s disease [21] versus older people with a diagnosis of dementia [25]. While the intended dose for both studies was high (50+ hours), only 7% of participants (n=3) adhered to this dose in the tai-chi intervention. The home-based and group-based multicomponent interventions [21] had high adherence (“The median numbers of session participations were 81 (range, 7-89) in the home-exercise group and 75 (range, 7-89) in the group-exercise group”) but the home-based exercise was most efficacious in preventing falls. Effectiveness of the exercise intervention will drive the cost-effectiveness of the program.</p> |
| Monitoring and evaluation     | <p>Fall rates in residential care can be highly variable. Fall rates in the community can differ by dementia subtype.</p> <p>Falls and fall-related injuries should be continuously monitored and evaluated over time with appropriate statistical techniques. The amount and type of physical activity undertaken should also be monitored.</p>                                                                                                                                                                                                                                                                                                                                                                                                                                                                                                                                                                                                                                                                                                                                                                                                                                                                                                                                     |
| Research Priorities           | <p>Trials to determine:</p> <ul style="list-style-type: none"> <li>-optimal type, dose, mode of delivery and level of supervision of exercise depending in residential care setting</li> <li>-optimal type, dose, mode of delivery and level of supervision of exercise depending on cognitive impairment subtype</li> <li>-cost-effectiveness of fall prevention exercise programs</li> </ul> <p>Trials need to be conducted in a range of countries with differing aged care systems and funding models.</p>                                                                                                                                                                                                                                                                                                                                                                                                                                                                                                                                                                                                                                                                                                                                                                       |

## References

1. Allan LM, Ballard CG, Rowan EN et al (2009) Incidence and prediction of falls in dementia: a prospective study in older people. *pLoS ONE*. 4:e5521.
2. Tinetti ME, Speechley M, Ginter SF (1988) Risk Factors for Falls among Elderly Persons Living in the Community. *New England Journal of Medicine*. 319:1701-1707.
3. Vassallo M, Mallela SK, Williams A et al (2009) Fall risk factors in elderly patients with cognitive impairment on rehabilitation wards. *Geriatrics and Gerontology International*. 9:41-46.
4. Taylor ME, Delbaere K, Lord SR et al (2013) Physical impairments in cognitively impaired older people: implications for risk of falls. *International Psychogeriatrics*. 25:148-156.
5. Baker NL, Cook MN, Arrighi HM et al (2011) Hip fracture risk and subsequent mortality among Alzheimer's disease patients in the United Kingdom, 1988-2007. *Age Ageing*. 40:49-54.
6. Weller I, Schatzker J (2004) Hip fractures and Alzheimer's disease in elderly institutionalized Canadians. *Annals of Epidemiology*. 14:319-24.
7. Harvey L, Mitchell R, Brodaty H et al (2016) The influence of dementia on injury-related hospitalisations and outcomes in older adults. *Injury*. 47:226-234.
8. Harvey L, Mitchell R, Brodaty H et al (2016) Differing trends in fall-related fracture and non-fracture injuries in older people with and without dementia. *Archives of Gerontology and Geriatrics*. 67:61-67.
9. Cree M, Soskolne CL, Belseck E et al (2000) Mortality and institutionalization following hip fracture. *J Am Geriatr Soc*. 48:283-8.
10. Scandol JP, Toson B, Close JC (2012) Fall-related hip fracture hospitalisations and the prevalence of dementia within older people in New South Wales, Australia: An analysis of linked data. *Injury*. 44:776-783.
11. Marottoli RA, Berkman LF, Leo-Summers L et al (1994) Predictors of mortality and institutionalization after hip fracture: the New Haven EPESE cohort. *Established Populations for Epidemiologic Studies of the Elderly*. *Am J Public Health*. 84:1807-12.
12. Poynter L, Kwan J, Sayer AA et al (2011) Does cognitive impairment affect rehabilitation outcome? *J Am Geriatr Soc*. 59:2108-11.
13. Gruber-Baldini AL, Zimmerman S, Morrison RS et al (2003) Cognitive impairment in hip fracture patients: timing of detection and longitudinal follow-up. *Journal of the American Geriatrics Society*. 51:1227-36.
14. Magaziner J, Simonsick EM, Kashner TM et al (1990) Predictors of functional recovery one year following hospital discharge for hip fracture: a prospective study. *Journal of gerontology*. 45:M101-7.
15. Lenze EJ, Munin MC, Dew MA et al (2004) Adverse effects of depression and cognitive impairment on rehabilitation participation and recovery from hip fracture. *International Journal of Geriatric Psychiatry*. 19:472-478.
16. van Dortmont LMC, Douw CM, van Breukelen AMA et al (2000) Outcome after hemi-arthroplasty for displaced intracapsular femoral neck fracture related to mental state. *Injury*. 31:327-331.
17. Toulotte C, Fabre C, Dangremont B et al (2003) Effects of physical training on the physical capacity of frail, demented patients with a history of falling: a randomised controlled trial. *Age Ageing*. 32:67-73.
18. Zieschang T, Schwenk M, Becker C et al (2017) Falls and Physical Activity in Persons With Mild to Moderate Dementia Participating in an Intensive Motor Training: Randomized Controlled Trial. *Alzheimer Dis Assoc Disord*. 31:307-314.
19. Kovács E, Sztruhár Jónásné I, Karóczy CK et al (2013) Effects of a multimodal exercise program on balance, functional mobility and fall risk in older adults with cognitive impairment: a randomized controlled single-blind study. *Eur J Phys Rehabil Med*. 49:639-48.
20. Lamb SE, Sheehan B, Atherton N et al (2018) Dementia And Physical Activity (DAPA) trial of moderate to high intensity exercise training for people with dementia: randomised controlled trial. *Bmj*. 361:k1675.
21. Pitkälä KH, Pöysti MM, Laakkonen ML et al (2013) Effects of the Finnish Alzheimer disease exercise trial (FINALEX): a randomized controlled trial. *JAMA Intern Med*. 173:894-901.
22. de Souto Barreto P, Cesari M, Denormandie P et al (2017) Exercise or Social Intervention for Nursing Home Residents with Dementia: A Pilot Randomized, Controlled Trial. *J Am Geriatr Soc*. 65:E123-e129.
23. Rolland Y, Pillard F, Klapouszczak A et al (2007) Exercise program for nursing home residents with Alzheimer's disease: a 1-year randomized, controlled trial. *J Am Geriatr Soc*. 55:158-65.
24. Goldberg SE, van der Wardt V, Brand A et al (2019) Promoting activity, Independence and stability in early dementia (PrAISED): a, multisite, randomised controlled, feasibility trial. *BMC Geriatr*. 19:353.
25. Nyman SR, Ingram W, Sanders J et al (2019) Randomised Controlled Trial Of The Effect Of Tai Chi On Postural Balance Of People With Dementia. *Clin Interv Aging*. 14:2017-2029.

26. Suttanon P, Hill KD, Said CM et al (2013) Feasibility, safety and preliminary evidence of the effectiveness of a home-based exercise programme for older people with Alzheimer's disease: a pilot randomized controlled trial. *Clin Rehabil.* 27:427-38.
27. Taylor ME, Wesson J, Sherrington C et al (2021) Tailored Exercise and Home Hazard Reduction Program for Fall Prevention in Older People With Cognitive Impairment: The i-FOCIS Randomized Controlled Trial. *J Gerontol A Biol Sci Med Sci.* 76:655-665.
28. Toots A, Wiklund R, Littbrand H et al (2019) The Effects of Exercise on Falls in Older People With Dementia Living in Nursing Homes: A Randomized Controlled Trial. *J Am Med Dir Assoc.* 20:835-842.e1.
29. Wesson J, Clemson L, Brodaty H et al (2013) A feasibility study and pilot randomised trial of a tailored prevention program to reduce falls in older people with mild dementia. *BMC Geriatr.* 13:89.
30. Booth V, Harwood R, Hancox JE et al (2019) Motivation as a mechanism underpinning exercise-based falls prevention programmes for older adults with cognitive impairment: a realist review. *BMJ Open.* 9:e024982.
31. WHO, WHO guidelines on physical activity and sedentary behaviour. 2020, World Health Organisation: Geneva.

## Working Group 5: Falls in Hospitals

### Recommendations for Working Group 5: Falls in Hospitals

**Recommendation 1 (Hospital Assessments):** We conditionally recommend performing multifactorial falls risk assessment in all hospitalised older adults >65 years of age. We recommend against using scored falls risk screening tools in hospitals for multifactorial falls assessment in older adults. **GRADE 2B.**

**Recommendation 2 (Hospital Assessment):** We recommend conducting a post-fall assessment in 74 hospitalized older adults following a fall in order to identify the mechanism of the fall, any resulting injuries, any precipitating factors (such as new intercurrent illness, complications or delirium), to reassess the individual's fall risk factors, and adjust the intervention strategy for the 74 hospitalized older adults. **GRADE E.**

| <b>Population:</b>      | Hospital patients $\geq 65$ years of age | <b>Objective:</b> To review the literature to assess the effectiveness of multifactorial falls risk assessment and falls risk screening tools to prevent falls in hospitalized older adults. |                   |                                         |
|-------------------------|------------------------------------------|----------------------------------------------------------------------------------------------------------------------------------------------------------------------------------------------|-------------------|-----------------------------------------|
| <b>Intervention:</b>    | Multifactorial falls risk assessment     |                                                                                                                                                                                              |                   |                                         |
| <b>Comparison:</b>      | Usual care                               |                                                                                                                                                                                              |                   |                                         |
| <b>Main outcomes:</b>   | Falls                                    |                                                                                                                                                                                              |                   |                                         |
| <b>Setting:</b>         | Acute hospital care setting              |                                                                                                                                                                                              |                   |                                         |
| <b>Perspective:</b>     | Population                               |                                                                                                                                                                                              |                   |                                         |
| Decision Domain         |                                          | Judgements                                                                                                                                                                                   | Research Evidence | Additional Considerations /Explanations |
| Priority of the Problem | Is the problem a priority?               | <ul style="list-style-type: none"> <li>○ No</li> <li>○ Probably no</li> <li>○ Uncertain</li> <li>○ Probably yes</li> <li>● <b>Yes</b></li> <li>○ Varies</li> </ul>                           |                   |                                         |

|                                                 |                                                                                                                                              |                                                                                                                                                                                                                                                                                                         |                                                              |                            |                                          |       |
|-------------------------------------------------|----------------------------------------------------------------------------------------------------------------------------------------------|---------------------------------------------------------------------------------------------------------------------------------------------------------------------------------------------------------------------------------------------------------------------------------------------------------|--------------------------------------------------------------|----------------------------|------------------------------------------|-------|
| <b>Benefits and harms</b><br>(see below)        | Is there important uncertainty or variability in how much patients, researchers, clinicians and stake holders value the main outcomes?       | <ul style="list-style-type: none"> <li>○ Important uncertainty or variability</li> <li>○ Possibly important uncertainty or variability</li> <li>● <b>Probably no important uncertainty of variability</b></li> <li>○ No important uncertainty of variability</li> <li>○ No known undesirable</li> </ul> | <b>Relative importance of the main outcomes of interest:</b> |                            |                                          | None. |
|                                                 |                                                                                                                                              |                                                                                                                                                                                                                                                                                                         | <b>Outcome</b>                                               | <b>Relative Importance</b> | <b>Certainty of the evidence (GRADE)</b> |       |
|                                                 |                                                                                                                                              |                                                                                                                                                                                                                                                                                                         | Falls                                                        | Critical                   | ⊕⊕⊕○<br>MODERATE                         |       |
|                                                 |                                                                                                                                              |                                                                                                                                                                                                                                                                                                         | Fall rate                                                    | Critical                   | ⊕⊕⊕○<br>MODERATE                         |       |
|                                                 |                                                                                                                                              |                                                                                                                                                                                                                                                                                                         |                                                              |                            | ○○○○<br>MODERATE                         |       |
|                                                 |                                                                                                                                              |                                                                                                                                                                                                                                                                                                         |                                                              |                            | ○○○○<br>MODERATE                         |       |
|                                                 |                                                                                                                                              |                                                                                                                                                                                                                                                                                                         |                                                              |                            | ○○○○<br>MODERATE                         |       |
|                                                 |                                                                                                                                              |                                                                                                                                                                                                                                                                                                         |                                                              |                            | ○○○○<br>MODERATE                         |       |
|                                                 |                                                                                                                                              |                                                                                                                                                                                                                                                                                                         |                                                              |                            | ○○○○<br>MODERATE                         |       |
|                                                 |                                                                                                                                              |                                                                                                                                                                                                                                                                                                         |                                                              |                            | ○○○○<br>MODERATE                         |       |
| What is the overall certainty of this evidence? | <ul style="list-style-type: none"> <li>○ No studies</li> <li>○ Very low</li> <li>○ Low</li> <li>● <b>Moderate</b></li> <li>○ High</li> </ul> |                                                                                                                                                                                                                                                                                                         |                                                              |                            |                                          |       |

|                                                                                                         |                                                                                                                                                                                                                                                       |                                                      |                                                                                                          |                                                                                                                |                                |                                                      |
|---------------------------------------------------------------------------------------------------------|-------------------------------------------------------------------------------------------------------------------------------------------------------------------------------------------------------------------------------------------------------|------------------------------------------------------|----------------------------------------------------------------------------------------------------------|----------------------------------------------------------------------------------------------------------------|--------------------------------|------------------------------------------------------|
| How substantial are the desirable anticipated effects of the intervention?                              | <ul style="list-style-type: none"> <li>○ Large</li> <li>○ Moderate</li> <li>● <b>Small</b></li> <li>○ Trivial</li> <li>○ Varies</li> <li>○ Don't know</li> </ul>                                                                                      | <b>Summary of findings (GRADE): 2B</b>               |                                                                                                          |                                                                                                                |                                |                                                      |
|                                                                                                         |                                                                                                                                                                                                                                                       | <b>Outcome</b>                                       | <b>Intervention</b>                                                                                      | <b>Control</b>                                                                                                 |                                | <b>Effect</b><br><b>Relative / Absolute (95% CI)</b> |
| How substantial are the undesirable anticipated effects of the intervention?                            | <ul style="list-style-type: none"> <li>● <b>Trivial</b></li> <li>○ Small</li> <li>○ Moderate</li> <li>○ Large</li> <li>○ Varies</li> <li>○ Don't know</li> </ul>                                                                                      | Fall rate <sup>4</sup>                               | Fall risk screening tool component and associated summary scores and numerical risk ratings were removed | Fall risk screening tools to detect patients at high falls risk continued as usual                             | IRR = 0.809<br>(0.538 – 1.217) |                                                      |
|                                                                                                         |                                                                                                                                                                                                                                                       | Falls rate <sup>5</sup>                              | Removing a falls risk screening tool from an overall falls risk assessment program<br>Usual care         | Falls rate per month<br>IRR = 0.84<br>(0.67 – 1.05)<br>Falls rate with injuries<br>IRR = 0.90<br>(0.26 – 3.09) |                                |                                                      |
|                                                                                                         |                                                                                                                                                                                                                                                       | Falls rate in hospitals <sup>6</sup><br>(aged 55-64) | Multifactorial falls risk assessment, followed by implementation of multidomain interventions            | Usual care                                                                                                     | IRR = 0.80<br>(0.64 – 1.01)    |                                                      |
| Does the balance between desirable effects and undesirable effects favour the option of the comparison? | <ul style="list-style-type: none"> <li>○ Favours the option</li> <li>● <b>Probably favours the option</b></li> <li>○ Does not favour either</li> <li>○ Probably favours the comparison</li> <li>○ Favours the comparison</li> <li>○ Varies</li> </ul> |                                                      |                                                                                                          |                                                                                                                |                                |                                                      |

|                                                                                             |                                                                                                                                                                                    |                                                                                                                                                                                                                                                                                                                                                                                                                                    |                                                                                                                                    |  |
|---------------------------------------------------------------------------------------------|------------------------------------------------------------------------------------------------------------------------------------------------------------------------------------|------------------------------------------------------------------------------------------------------------------------------------------------------------------------------------------------------------------------------------------------------------------------------------------------------------------------------------------------------------------------------------------------------------------------------------|------------------------------------------------------------------------------------------------------------------------------------|--|
| <p style="writing-mode: vertical-rl; transform: rotate(180deg);">Values and preferences</p> | <p>Is there similarity about how much patients, researchers, clinicians and stake holders value the main Outcomes? Also include adverse effects and burden of the intervention</p> | <ul style="list-style-type: none"> <li><input type="radio"/> No</li> <li><input type="radio"/> Probably no</li> <li><input type="radio"/> Uncertain</li> <li><input type="radio"/> Probably yes</li> <li><input checked="" type="radio"/> <b>Yes</b></li> <li><input type="radio"/> Varies</li> </ul>                                                                                                                              |                                                                                                                                    |  |
| <p style="writing-mode: vertical-rl; transform: rotate(180deg);">Resources</p>              | <p>What is the certainty of the evidence of resources requirements (costs)?</p>                                                                                                    | <ul style="list-style-type: none"> <li><input type="radio"/> No studies</li> <li><input checked="" type="radio"/> <b>Very low</b></li> <li><input type="radio"/> Low</li> <li><input type="radio"/> Moderate</li> <li><input type="radio"/> High</li> </ul>                                                                                                                                                                        | <p>No specific costs mentioned however the intervention involves the removal of a falls risk screening tool and an assessment.</p> |  |
|                                                                                             | <p>Does the cost effectiveness favour the intervention or the comparison?</p>                                                                                                      | <ul style="list-style-type: none"> <li><input type="radio"/> No studies</li> <li><input type="radio"/> Favours the option</li> <li><input checked="" type="radio"/> <b>Probably favours the option</b></li> <li><input type="radio"/> Does not favour either</li> <li><input type="radio"/> Probably favours the comparison</li> <li><input type="radio"/> Favours the comparison</li> <li><input type="radio"/> Varies</li> </ul> |                                                                                                                                    |  |



|               |                                               |                                                                                                                                                                                                                                                                                                                             |  |  |
|---------------|-----------------------------------------------|-----------------------------------------------------------------------------------------------------------------------------------------------------------------------------------------------------------------------------------------------------------------------------------------------------------------------------|--|--|
| Equity        | What would be the impact on health equity?    | <ul style="list-style-type: none"> <li><input type="radio"/> Increased</li> <li><input type="radio"/> Probably increased</li> <li><input checked="" type="radio"/> <b>Uncertain</b></li> <li><input type="radio"/> Probably reduced</li> <li><input type="radio"/> Reduced</li> <li><input type="radio"/> Varies</li> </ul> |  |  |
| Acceptability | Is the option acceptable to key stakeholders? | <ul style="list-style-type: none"> <li><input type="radio"/> No</li> <li><input type="radio"/> Probably no</li> <li><input type="radio"/> Uncertain</li> <li><input checked="" type="radio"/> Probably yes</li> <li><input type="radio"/> Yes</li> <li><input type="radio"/> Varies</li> </ul>                              |  |  |

|             |                                            |                                                                                                                                                                                                                                                                                                       |  |  |
|-------------|--------------------------------------------|-------------------------------------------------------------------------------------------------------------------------------------------------------------------------------------------------------------------------------------------------------------------------------------------------------|--|--|
| Feasibility | Is the intervention feasible to implement? | <ul style="list-style-type: none"> <li><input type="radio"/> No</li> <li><input type="radio"/> Probably no</li> <li><input type="radio"/> Uncertain</li> <li><input type="radio"/> Probably yes</li> <li><input checked="" type="radio"/> <b>Yes</b></li> <li><input type="radio"/> Varies</li> </ul> |  |  |
|-------------|--------------------------------------------|-------------------------------------------------------------------------------------------------------------------------------------------------------------------------------------------------------------------------------------------------------------------------------------------------------|--|--|

**Should hospitalized patients >65 years of age have a multifactorial falls risk assessment and recommend against using falls risk screening tools in hospitals, as all older hospitalized adults are at risk for falls be recommended for older adults to prevent and manage falls?**

| Type of recommendation        | Strong recommendation against the intervention<br><input type="radio"/>                                                                                                                                                                                                                                                                                                                                                                                                                                                                                                                                                                                                                                                                       | Weak recommendation against the intervention<br><input type="radio"/> | Conditional recommendation for either the intervention or the comparison<br><input type="radio"/> | Weak recommendation for the intervention<br><input type="radio"/> | Strong recommendation for the intervention<br><input checked="" type="radio"/> |
|-------------------------------|-----------------------------------------------------------------------------------------------------------------------------------------------------------------------------------------------------------------------------------------------------------------------------------------------------------------------------------------------------------------------------------------------------------------------------------------------------------------------------------------------------------------------------------------------------------------------------------------------------------------------------------------------------------------------------------------------------------------------------------------------|-----------------------------------------------------------------------|---------------------------------------------------------------------------------------------------|-------------------------------------------------------------------|--------------------------------------------------------------------------------|
| Recommendation                | <p>Recommendation 1: We conditionally recommend performing multifactorial falls risk assessment in all hospitalized older adults &gt;65 years of age. We recommend against using scored falls risk screening tools in hospitals for multifactorial falls risk assessment in older adults. <b>GRADE 2B.</b></p> <p>Recommendation 2: We recommend conducting a post-fall assessment in hospitalized older adults following a fall in order to identify the mechanism of the fall, any resulting injuries, any precipitating factors (such as new intercurrent illness, complications or delirium), to reassess the individual's fall risk factors, and adjust the intervention strategy for the hospitalized older adults. <b>GRADE E.</b></p> |                                                                       |                                                                                                   |                                                                   |                                                                                |
| Justification                 | Falls risk screening tools and multifactorial falls risk assessments are sometimes used interchangeably, but there are substantial differences. There is a case for divesting from fall risk screening tool scoring, as it does not reduce falls and takes valuable time. Falls risk assessment is a more detailed process used to identify underlying risk factors and inform the development of a care plan to reduce falls and injuries.                                                                                                                                                                                                                                                                                                   |                                                                       |                                                                                                   |                                                                   |                                                                                |
| Subgroup considerations       | Younger patients (aged 55-64 years) with neurological disorders, stroke, cognitive impairment/delirium, hip fractures, or anyone that clinicians have judged as 'at risk' of falls should also undergo a multifactorial falls risk assessment.                                                                                                                                                                                                                                                                                                                                                                                                                                                                                                |                                                                       |                                                                                                   |                                                                   |                                                                                |
| Implementation considerations | <ul style="list-style-type: none"> <li>• Highlight that a conversation about multifactorial falls risk assessment should occur at admission.</li> <li>• Falls risk assessments should be complete as soon as practical following admission.</li> <li>• Falls risk assessments should be reviewed if there is a change in a patient's condition or if the patient falls.</li> <li>• The results of multifactorial falls risk assessments need to be documented, recorded, and used to formulate the patient care plan.</li> <li>• Clinical reasoning/judgment should be considered when deciding which falls prevention interventions to implement.</li> </ul>                                                                                 |                                                                       |                                                                                                   |                                                                   |                                                                                |
| Monitoring and evaluation     | Processes to ensure multifactorial falls risk assessments are being completed in a timely and accurate manner (e.g., regular audits) should be considered.                                                                                                                                                                                                                                                                                                                                                                                                                                                                                                                                                                                    |                                                                       |                                                                                                   |                                                                   |                                                                                |

|                     |                                                                                                                                                                                                                                                                                    |
|---------------------|------------------------------------------------------------------------------------------------------------------------------------------------------------------------------------------------------------------------------------------------------------------------------------|
| Research Priorities | The evidence is sufficient now NOT to investigate the assessment screening tools further in the acute setting, but it should be further investigated in rehabilitation setting. Further research is also warranted on the utility and effectiveness of falls detection technology. |
|---------------------|------------------------------------------------------------------------------------------------------------------------------------------------------------------------------------------------------------------------------------------------------------------------------------|

## Recommendations for Working Group 5: Falls in Hospitals

**Recommendation 1 (Hospitals Management and Interventions): We recommend that a tailored education on falls prevention should be delivered to all hospitalised older adults ( $\geq 65$  years of age) and other high-risk groups. GRADE 1A.**

| <b>Population:</b>      | Hospital patients $\geq 65$ years of age | <b>Objective:</b> To review the literature to assess whether education (alone or in conjunction with other falls prevention interventions) effectively reduces falls and determine what modes of education are most feasible. |                   |                                         |
|-------------------------|------------------------------------------|-------------------------------------------------------------------------------------------------------------------------------------------------------------------------------------------------------------------------------|-------------------|-----------------------------------------|
| <b>Intervention:</b>    | Tailored patient education               |                                                                                                                                                                                                                               |                   |                                         |
| <b>Comparison:</b>      | Usual care                               |                                                                                                                                                                                                                               |                   |                                         |
| <b>Main outcomes:</b>   | Falls                                    |                                                                                                                                                                                                                               |                   |                                         |
| <b>Setting:</b>         | Hospital care                            |                                                                                                                                                                                                                               |                   |                                         |
| <b>Perspective:</b>     | Hospital population                      |                                                                                                                                                                                                                               |                   |                                         |
| Decision Domain         |                                          | Judgements                                                                                                                                                                                                                    | Research Evidence | Additional Considerations /Explanations |
| Priority of the Problem | Is the problem a priority?               | <ul style="list-style-type: none"> <li>○ No</li> <li>○ Probably no</li> <li>○ Uncertain</li> <li>○ Probably yes</li> <li>● <b>Yes</b></li> <li>○ Varies</li> </ul>                                                            |                   |                                         |

|                                                 |                                                                                                                                              |                                                                                                                                                                                                                                                                                                         |                                                              |                            |                                          |       |
|-------------------------------------------------|----------------------------------------------------------------------------------------------------------------------------------------------|---------------------------------------------------------------------------------------------------------------------------------------------------------------------------------------------------------------------------------------------------------------------------------------------------------|--------------------------------------------------------------|----------------------------|------------------------------------------|-------|
| Benefits and harms<br>(see below)               | Is there important uncertainty or variability in how much patients, researchers, clinicians and stake holders value the main outcomes?       | <ul style="list-style-type: none"> <li>○ Important uncertainty or variability</li> <li>○ Possibly important uncertainty or variability</li> <li>● <b>Probably no important uncertainty of variability</b></li> <li>○ No important uncertainty of variability</li> <li>○ No known undesirable</li> </ul> | <b>Relative importance of the main outcomes of interest:</b> |                            |                                          | None. |
|                                                 |                                                                                                                                              |                                                                                                                                                                                                                                                                                                         | <b>Outcome</b>                                               | <b>Relative Importance</b> | <b>Certainty of the evidence (GRADE)</b> |       |
|                                                 |                                                                                                                                              |                                                                                                                                                                                                                                                                                                         | Falls                                                        | Critical                   | ⊕⊕⊕○<br>MODERATE                         |       |
|                                                 |                                                                                                                                              |                                                                                                                                                                                                                                                                                                         | Rate of falls                                                | Critical                   | ⊕⊕⊕○<br>MODERATE                         |       |
|                                                 |                                                                                                                                              |                                                                                                                                                                                                                                                                                                         |                                                              |                            | ○○○○<br>MODERATE                         |       |
|                                                 |                                                                                                                                              |                                                                                                                                                                                                                                                                                                         |                                                              |                            | ○○○○<br>MODERATE                         |       |
|                                                 |                                                                                                                                              |                                                                                                                                                                                                                                                                                                         |                                                              |                            | ○○○○<br>MODERATE                         |       |
|                                                 |                                                                                                                                              |                                                                                                                                                                                                                                                                                                         |                                                              |                            | ○○○○<br>MODERATE                         |       |
|                                                 |                                                                                                                                              |                                                                                                                                                                                                                                                                                                         |                                                              |                            | ○○○○<br>MODERATE                         |       |
|                                                 |                                                                                                                                              |                                                                                                                                                                                                                                                                                                         |                                                              |                            | ○○○○<br>MODERATE                         |       |
| What is the overall certainty of this evidence? | <ul style="list-style-type: none"> <li>○ No studies</li> <li>○ Very low</li> <li>○ Low</li> <li>● <b>Moderate</b></li> <li>○ High</li> </ul> |                                                                                                                                                                                                                                                                                                         |                                                              |                            |                                          |       |

|                                                                                                         |                                                                                                                                                                                                                                                       |                                        |                                  |                |                                                                                      |
|---------------------------------------------------------------------------------------------------------|-------------------------------------------------------------------------------------------------------------------------------------------------------------------------------------------------------------------------------------------------------|----------------------------------------|----------------------------------|----------------|--------------------------------------------------------------------------------------|
| How substantial are the desirable anticipated effects of the intervention?                              | <ul style="list-style-type: none"> <li>○ Large</li> <li>● <b>Moderate</b></li> <li>○ Small</li> <li>○ Trivial</li> <li>○ Varies</li> <li>○ Don't know</li> </ul>                                                                                      | <b>Summary of findings (GRADE): 1A</b> |                                  |                |                                                                                      |
|                                                                                                         |                                                                                                                                                                                                                                                       |                                        | <b>N<sup>o</sup> of patients</b> |                |                                                                                      |
| How substantial are the undesirable anticipated effects of the intervention?                            | <ul style="list-style-type: none"> <li>● <b>Trivial</b></li> <li>○ Small</li> <li>○ Moderate</li> <li>○ Large</li> <li>○ Varies</li> <li>○ Don't know</li> </ul>                                                                                      | <b>Outcome</b>                         | <b>Intervention</b>              | <b>Control</b> | <b>Relative / Absolute (95% CI)</b>                                                  |
|                                                                                                         |                                                                                                                                                                                                                                                       | Falls rate <sup>2</sup>                |                                  |                | Hospital and post discharge populations<br>RR = 0.77<br>(0.69 – 0.87)                |
| Does the balance between desirable effects and undesirable effects favour the option of the comparison? | <ul style="list-style-type: none"> <li>○ Favours the option</li> <li>● <b>Probably favours the option</b></li> <li>○ Does not favour either</li> <li>○ Probably favours the comparison</li> <li>○ Favours the comparison</li> <li>○ Varies</li> </ul> | Falls rate <sup>2</sup>                |                                  |                | Proportion of fallers who became patients in hospitals<br>RR = 0.78<br>(0.70 – 0.87) |
|                                                                                                         |                                                                                                                                                                                                                                                       |                                        |                                  |                |                                                                                      |

|                                                                        |                                                                                                                                                                             |                                                                                                                                                                                                                                                                             |                                                                                                                                              |  |
|------------------------------------------------------------------------|-----------------------------------------------------------------------------------------------------------------------------------------------------------------------------|-----------------------------------------------------------------------------------------------------------------------------------------------------------------------------------------------------------------------------------------------------------------------------|----------------------------------------------------------------------------------------------------------------------------------------------|--|
| Values and preferences                                                 | Is there similarity about how much patients, researchers, clinicians and stake holders value the main Outcomes? Also include adverse effects and burden of the intervention | <ul style="list-style-type: none"> <li>○ No</li> <li>○ Probably no</li> <li>○ Uncertain</li> <li>● <b>Probably yes</b></li> <li>○ Yes</li> <li>○ Varies</li> </ul>                                                                                                          |                                                                                                                                              |  |
|                                                                        | Resources                                                                                                                                                                   | What is the certainty of the evidence of resources requirements (costs)?                                                                                                                                                                                                    | <ul style="list-style-type: none"> <li>● <b>No studies</b></li> <li>○ Very low</li> <li>○ Low</li> <li>○ Moderate</li> <li>○ High</li> </ul> |  |
| Does the cost effectiveness favour the intervention or the comparison? |                                                                                                                                                                             | <ul style="list-style-type: none"> <li>● <b>No studies</b></li> <li>○ Favours the option</li> <li>○ Probably favours the option</li> <li>○ Does not favour either</li> <li>○ Probably favours the comparison</li> <li>○ Favours the comparison</li> <li>○ Varies</li> </ul> |                                                                                                                                              |  |

|               |                                               |                                                                                                                                                                                                                                                                                                                             |  |  |
|---------------|-----------------------------------------------|-----------------------------------------------------------------------------------------------------------------------------------------------------------------------------------------------------------------------------------------------------------------------------------------------------------------------------|--|--|
| Equity        | What would be the impact on health equity?    | <ul style="list-style-type: none"> <li><input type="radio"/> Increased</li> <li><input type="radio"/> Probably increased</li> <li><input checked="" type="radio"/> <b>Uncertain</b></li> <li><input type="radio"/> Probably reduced</li> <li><input type="radio"/> Reduced</li> <li><input type="radio"/> Varies</li> </ul> |  |  |
| Acceptability | Is the option acceptable to key stakeholders? | <ul style="list-style-type: none"> <li><input type="radio"/> No</li> <li><input type="radio"/> Probably no</li> <li><input type="radio"/> Uncertain</li> <li><input checked="" type="radio"/> <b>Probably yes</b></li> <li><input type="radio"/> Yes</li> <li><input type="radio"/> Varies</li> </ul>                       |  |  |



|             |                                            |                                                                                                                                                                                                                                                                                                       |  |  |
|-------------|--------------------------------------------|-------------------------------------------------------------------------------------------------------------------------------------------------------------------------------------------------------------------------------------------------------------------------------------------------------|--|--|
| Feasibility | Is the intervention feasible to implement? | <ul style="list-style-type: none"> <li><input type="radio"/> No</li> <li><input type="radio"/> Probably no</li> <li><input type="radio"/> Uncertain</li> <li><input type="radio"/> Probably yes</li> <li><input checked="" type="radio"/> <b>Yes</b></li> <li><input type="radio"/> Varies</li> </ul> |  |  |
|-------------|--------------------------------------------|-------------------------------------------------------------------------------------------------------------------------------------------------------------------------------------------------------------------------------------------------------------------------------------------------------|--|--|

**Should tailored patient education on falls prevention should be delivered to all hospitalized patients  $\geq 65$  years of age and other high-risk groups be recommended for older adults to prevent and manage falls?**

| Type of recommendation        | Strong recommendation against the intervention<br><input type="radio"/>                                                                                                                                                                                                                                                                                                                                                                                                                                                                                                                                                 | Weak recommendation against the intervention<br><input type="radio"/> | Conditional recommendation for either the intervention or the comparison<br><input type="radio"/> | Weak recommendation for the intervention<br><input type="radio"/> | Strong recommendation for the intervention<br><input checked="" type="radio"/> |
|-------------------------------|-------------------------------------------------------------------------------------------------------------------------------------------------------------------------------------------------------------------------------------------------------------------------------------------------------------------------------------------------------------------------------------------------------------------------------------------------------------------------------------------------------------------------------------------------------------------------------------------------------------------------|-----------------------------------------------------------------------|---------------------------------------------------------------------------------------------------|-------------------------------------------------------------------|--------------------------------------------------------------------------------|
| Recommendation                | Recommendation 1: We recommend that a tailored patient education on falls prevention should be delivered to all hospitalised older adults ( $\geq 65$ years of age) and other high-risk groups. GRADE 1A.                                                                                                                                                                                                                                                                                                                                                                                                               |                                                                       |                                                                                                   |                                                                   |                                                                                |
| Justification                 | Some patients initiate risky decisions about mobility based on their own judgements, without always seeking help from nurses or other health professionals. This could be due to a lack of knowledge or behavioural symptoms of delirium and dementia. Patient education is one strategy to address this. Patient education assists patients in self-manage their own falls risk by increasing a person's awareness of their own falls risk and providing them with strategies to mitigate falls whilst hospitalized. Education is usually delivered in conjunction with other strategies (no evidence it works alone). |                                                                       |                                                                                                   |                                                                   |                                                                                |
| Subgroup considerations       | This recommendation may not be relevant for people with cognitive impairment, but it may be relevant for their family members/carers [4].                                                                                                                                                                                                                                                                                                                                                                                                                                                                               |                                                                       |                                                                                                   |                                                                   |                                                                                |
| Implementation considerations | The use of interpreters should be considered when providing education to people from culturally and linguistically diverse backgrounds.                                                                                                                                                                                                                                                                                                                                                                                                                                                                                 |                                                                       |                                                                                                   |                                                                   |                                                                                |
| Monitoring and evaluation     | Strategies to evaluate the impact of education packages should be considered.                                                                                                                                                                                                                                                                                                                                                                                                                                                                                                                                           |                                                                       |                                                                                                   |                                                                   |                                                                                |
| Research Priorities           | More research is needed to investigate new and innovative strategies and health literacy techniques to provide education (e.g., Teach-back).                                                                                                                                                                                                                                                                                                                                                                                                                                                                            |                                                                       |                                                                                                   |                                                                   |                                                                                |

## Recommendations for Working Group 5: Falls in Hospitals

**Recommendation 2 (Hospitals Management and Interventions):** We recommend that personalised single or multidomain falls prevention strategies based on identified risk factors or behaviours or situations be implemented for all hospitalized older adults ( $\geq 65$  years of age), or younger individuals identified by the health professionals as at risk of falls. **GRADE: 1C (Acute care) & 1B (Sub-acute care).**

| <b>Population:</b>      | Hospital patients $\geq 65$ years of age | <b>Objective:</b> To review the literature to evaluate the effectiveness of falls prevention interventions on reducing falls in hospitalized older adults.  |                   |                                         |
|-------------------------|------------------------------------------|-------------------------------------------------------------------------------------------------------------------------------------------------------------|-------------------|-----------------------------------------|
| <b>Intervention:</b>    | Falls prevention strategies.             |                                                                                                                                                             |                   |                                         |
| <b>Comparison:</b>      | Usual care                               |                                                                                                                                                             |                   |                                         |
| <b>Main outcomes:</b>   | Falls                                    |                                                                                                                                                             |                   |                                         |
| <b>Setting:</b>         | Hospital care                            |                                                                                                                                                             |                   |                                         |
| <b>Perspective:</b>     | Hospital population                      |                                                                                                                                                             |                   |                                         |
| Decision Domain         |                                          | Judgements                                                                                                                                                  | Research Evidence | Additional Considerations /Explanations |
| Priority of the Problem | Is the problem a priority?               | <ul style="list-style-type: none"> <li>○ No</li> <li>○ Probably no</li> <li>○ Uncertain</li> <li>○ Probably yes</li> <li>● Yes</li> <li>○ Varies</li> </ul> |                   |                                         |

|                                                 |                                                                                                                                              |                                                                                                                                                                                                                                                                                                         |                                                              |                            |                                          |       |
|-------------------------------------------------|----------------------------------------------------------------------------------------------------------------------------------------------|---------------------------------------------------------------------------------------------------------------------------------------------------------------------------------------------------------------------------------------------------------------------------------------------------------|--------------------------------------------------------------|----------------------------|------------------------------------------|-------|
| Benefits and harms<br>(see below)               | Is there important uncertainty or variability in how much patients, researchers, clinicians and stake holders value the main outcomes?       | <ul style="list-style-type: none"> <li>○ Important uncertainty or variability</li> <li>○ Possibly important uncertainty or variability</li> <li>● <b>Probably no important uncertainty of variability</b></li> <li>○ No important uncertainty of variability</li> <li>○ No known undesirable</li> </ul> | <b>Relative importance of the main outcomes of interest:</b> |                            |                                          | None. |
|                                                 |                                                                                                                                              |                                                                                                                                                                                                                                                                                                         | <b>Outcome</b>                                               | <b>Relative Importance</b> | <b>Certainty of the evidence (GRADE)</b> |       |
|                                                 |                                                                                                                                              |                                                                                                                                                                                                                                                                                                         | Falls                                                        | Critical                   | ⊕⊕⊕○<br>MODERATE                         |       |
|                                                 |                                                                                                                                              |                                                                                                                                                                                                                                                                                                         | Rate of falls                                                | Critical                   | ⊕⊕⊕○<br>MODERATE                         |       |
|                                                 |                                                                                                                                              |                                                                                                                                                                                                                                                                                                         |                                                              |                            | ○○○○<br>MODERATE                         |       |
|                                                 |                                                                                                                                              |                                                                                                                                                                                                                                                                                                         |                                                              |                            | ○○○○<br>MODERATE                         |       |
|                                                 |                                                                                                                                              |                                                                                                                                                                                                                                                                                                         |                                                              |                            | ○○○○<br>MODERATE                         |       |
|                                                 |                                                                                                                                              |                                                                                                                                                                                                                                                                                                         |                                                              |                            | ○○○○<br>MODERATE                         |       |
|                                                 |                                                                                                                                              |                                                                                                                                                                                                                                                                                                         |                                                              |                            | ○○○○<br>MODERATE                         |       |
|                                                 |                                                                                                                                              |                                                                                                                                                                                                                                                                                                         |                                                              |                            | ○○○○<br>MODERATE                         |       |
| What is the overall certainty of this evidence? | <ul style="list-style-type: none"> <li>○ No studies</li> <li>○ Very low</li> <li>○ Low</li> <li>● <b>Moderate</b></li> <li>○ High</li> </ul> |                                                                                                                                                                                                                                                                                                         |                                                              |                            |                                          |       |

|                                                                                                         |                                                                                                                                                                                                                                                       |                                     |                                  |  |                                                                                                              |
|---------------------------------------------------------------------------------------------------------|-------------------------------------------------------------------------------------------------------------------------------------------------------------------------------------------------------------------------------------------------------|-------------------------------------|----------------------------------|--|--------------------------------------------------------------------------------------------------------------|
| How substantial are the desirable anticipated effects of the intervention?                              | <ul style="list-style-type: none"> <li>○ Large</li> <li>○ Moderate</li> <li>● <b>Small</b></li> <li>○ Trivial</li> <li>○ Varies</li> <li>○ Don't know</li> </ul>                                                                                      | <b>Summary of findings (GRADE):</b> |                                  |  | * Multidomain intervention in hospitals<br>** subacute setting<br>*** multidomain interventions on fall risk |
| How substantial are the undesirable anticipated effects of the intervention?                            | <ul style="list-style-type: none"> <li>● <b>Trivial</b></li> <li>○ Small</li> <li>○ Moderate</li> <li>○ Large</li> <li>○ Varies</li> <li>○ Don't know</li> </ul>                                                                                      | <b>Outcome</b>                      | <b>N<sub>o</sub> of patients</b> |  |                                                                                                              |
| Does the balance between desirable effects and undesirable effects favour the option of the comparison? | <ul style="list-style-type: none"> <li>○ Favours the option</li> <li>● <b>Probably favours the option</b></li> <li>○ Does not favour either</li> <li>○ Probably favours the comparison</li> <li>○ Favours the comparison</li> <li>○ Varies</li> </ul> | Fall rate <sup>5</sup>              |                                  |  | * RR = 0.80<br>(0.64 – 1.01)<br>** RR = 0.67<br>(0.54 – 0.83)<br>*** RR = 0.82<br>(0.62 – 1.09)              |
|                                                                                                         |                                                                                                                                                                                                                                                       | Falls rate (hospital) <sup>9</sup>  | Patient and staff education      |  | RaR = 0.70<br>(0.51 – 0.96)<br>OR = 0.62<br>(0.47 – 0.83)                                                    |
|                                                                                                         |                                                                                                                                                                                                                                                       |                                     |                                  |  |                                                                                                              |

|                        |                                                                                                                                                                                |                                                                                                                                                                                                                                                                             |                                                                                                    |  |
|------------------------|--------------------------------------------------------------------------------------------------------------------------------------------------------------------------------|-----------------------------------------------------------------------------------------------------------------------------------------------------------------------------------------------------------------------------------------------------------------------------|----------------------------------------------------------------------------------------------------|--|
| Values and preferences | Is there similarity about how much patients, researchers, clinicians and stake holders value the main Outcomes?<br>Also include adverse effects and burden of the intervention | <ul style="list-style-type: none"> <li>○ No</li> <li>○ Probably no</li> <li>○ Uncertain</li> <li>○ Probably yes</li> <li>○ Yes</li> <li>○ Varies</li> </ul>                                                                                                                 |                                                                                                    |  |
| Resources              | What is the certainty of the evidence of resources requirements (costs)?                                                                                                       | <ul style="list-style-type: none"> <li>○ No studies</li> <li>● <b>Very low</b></li> <li>○ Low</li> <li>○ Moderate</li> <li>○ High</li> </ul>                                                                                                                                | Recommendation is against the use of expensive fall risk assessment tools as single interventions. |  |
|                        | Does the cost effectiveness favour the intervention or the comparison?                                                                                                         | <ul style="list-style-type: none"> <li>○ No studies</li> <li>● <b>Favours the option</b></li> <li>○ Probably favours the option</li> <li>○ Does not favour either</li> <li>○ Probably favours the comparison</li> <li>○ Favours the comparison</li> <li>○ Varies</li> </ul> |                                                                                                    |  |

|               |                                               |                                                                                                                                                                                                                                                                                                                             |  |  |
|---------------|-----------------------------------------------|-----------------------------------------------------------------------------------------------------------------------------------------------------------------------------------------------------------------------------------------------------------------------------------------------------------------------------|--|--|
| Equity        | What would be the impact on health equity?    | <ul style="list-style-type: none"> <li><input type="radio"/> Increased</li> <li><input type="radio"/> Probably increased</li> <li><input checked="" type="radio"/> <b>Uncertain</b></li> <li><input type="radio"/> Probably reduced</li> <li><input type="radio"/> Reduced</li> <li><input type="radio"/> Varies</li> </ul> |  |  |
| Acceptability | Is the option acceptable to key stakeholders? | <ul style="list-style-type: none"> <li><input type="radio"/> No</li> <li><input type="radio"/> Probably no</li> <li><input type="radio"/> Uncertain</li> <li><input checked="" type="radio"/> <b>Probably yes</b></li> <li><input type="radio"/> Yes</li> <li><input type="radio"/> Varies</li> </ul>                       |  |  |

|             |                                            |                                                                                                                                                                                                                                                                                                       |  |  |
|-------------|--------------------------------------------|-------------------------------------------------------------------------------------------------------------------------------------------------------------------------------------------------------------------------------------------------------------------------------------------------------|--|--|
| Feasibility | Is the intervention feasible to implement? | <ul style="list-style-type: none"> <li><input type="radio"/> No</li> <li><input type="radio"/> Probably no</li> <li><input type="radio"/> Uncertain</li> <li><input type="radio"/> Probably yes</li> <li><input checked="" type="radio"/> <b>Yes</b></li> <li><input type="radio"/> Varies</li> </ul> |  |  |
|-------------|--------------------------------------------|-------------------------------------------------------------------------------------------------------------------------------------------------------------------------------------------------------------------------------------------------------------------------------------------------------|--|--|

**Should appropriate falls prevention strategies be implemented for all hospitalized patients ≥ 65 years of age or younger patients at risk of falls be recommended for older adults to prevent and manage falls?**

| Type of recommendation        | Strong recommendation against the intervention<br><input type="radio"/>                                                                                                                                                                                                                                                                                                                                                                                             | Weak recommendation against the intervention<br><input type="radio"/> | Conditional recommendation for either the intervention or the comparison<br><input type="radio"/> | Weak recommendation for the intervention<br><input type="radio"/> | Strong recommendation for the intervention<br><input checked="" type="radio"/> |
|-------------------------------|---------------------------------------------------------------------------------------------------------------------------------------------------------------------------------------------------------------------------------------------------------------------------------------------------------------------------------------------------------------------------------------------------------------------------------------------------------------------|-----------------------------------------------------------------------|---------------------------------------------------------------------------------------------------|-------------------------------------------------------------------|--------------------------------------------------------------------------------|
| Recommendation                | Recommendation 2: We recommend that personalised single or multidomain falls prevention strategies based on identified risk factors or behaviours or situations should be implemented for all hospitalised older adults (≥ 65 years of age), or younger individuals identified by the health professionals as at risk of falls. GRADE: 1C (Acute care) & 1B (Sub-acute care).                                                                                       |                                                                       |                                                                                                   |                                                                   |                                                                                |
| Justification                 | Developing and implementing a tailored falls prevention plan of care based on the findings of a multifactorial falls risk assessment may reduce falls in hospitals and their associated consequences: including deterioration of patient physical function due to fall-related injuries, social isolation, anxiety and depression, impaired rehabilitation, longer hospital stays and incapacity to return home, as well as increased health and social care costs. |                                                                       |                                                                                                   |                                                                   |                                                                                |
| Subgroup considerations       | Falls prevention interventions for patients with cognitive impairment and/or at high risk of delirium should be implemented in consultation with the patient and their family members/careers.                                                                                                                                                                                                                                                                      |                                                                       |                                                                                                   |                                                                   |                                                                                |
| Implementation considerations | Falls prevention interventions should adjust to the local resources and budget. Most multifactorial falls prevention programs are cost-effective but require time dedication by local staff, which is not always available at organizations with staff shortages or limited resources. In that case, caregivers and family members could assist with some components of the falls prevention program.                                                               |                                                                       |                                                                                                   |                                                                   |                                                                                |
| Monitoring and evaluation     | Interventions should be monitored on a regular basis to ensure they are implemented as intended and effective.                                                                                                                                                                                                                                                                                                                                                      |                                                                       |                                                                                                   |                                                                   |                                                                                |
| Research Priorities           | Further studies are warranted to develop/evaluate effective falls prevention interventions that reduce falls in hospitalized older adults, including those with cognitive impairment.                                                                                                                                                                                                                                                                               |                                                                       |                                                                                                   |                                                                   |                                                                                |

## Recommendations for Working Group 5: Falls in Nursing Homes

**Recommendation 1 (Care home assessment): We recommend against falls risk screening to identify care home residents at risk for falls, since all residents should be considered at high risk of falls.**

**GRADE: 1A**

| <b>Population:</b>             | Older adults $\geq 65$ years of age in nursing homes | <i><b>Objective:</b> Nursing home residents have an increased risk of falling due to physical frailty and/or cognitive decline. (Close &amp; Lord, 2011) Hence, they would all benefit from a multifactorial falls assessment and tailored interventions. However, this approach is time and resource-intensive and therefore not always feasible in routine practice. By identifying residents at the highest risk, a multifactorial falls risk assessment and tailored interventions can be offered to those older persons who could benefit most from it. (Nunan et al., 2018) The objective was to review the literature to assess what falls risk screening tool or process should be performed in nursing homes to identify residents with increased fall risk.</i> |                   |                                         |
|--------------------------------|------------------------------------------------------|---------------------------------------------------------------------------------------------------------------------------------------------------------------------------------------------------------------------------------------------------------------------------------------------------------------------------------------------------------------------------------------------------------------------------------------------------------------------------------------------------------------------------------------------------------------------------------------------------------------------------------------------------------------------------------------------------------------------------------------------------------------------------|-------------------|-----------------------------------------|
| <b>Intervention:</b>           | No fall risk screening                               |                                                                                                                                                                                                                                                                                                                                                                                                                                                                                                                                                                                                                                                                                                                                                                           |                   |                                         |
| <b>Comparison:</b>             | Fall risk screening                                  |                                                                                                                                                                                                                                                                                                                                                                                                                                                                                                                                                                                                                                                                                                                                                                           |                   |                                         |
| <b>Main outcomes:</b>          | Falls                                                |                                                                                                                                                                                                                                                                                                                                                                                                                                                                                                                                                                                                                                                                                                                                                                           |                   |                                         |
| <b>Setting:</b>                | Nursing homes                                        |                                                                                                                                                                                                                                                                                                                                                                                                                                                                                                                                                                                                                                                                                                                                                                           |                   |                                         |
| <b>Perspective:</b>            | Nursing home populations                             |                                                                                                                                                                                                                                                                                                                                                                                                                                                                                                                                                                                                                                                                                                                                                                           |                   |                                         |
| Decision Domain                |                                                      | Judgements                                                                                                                                                                                                                                                                                                                                                                                                                                                                                                                                                                                                                                                                                                                                                                | Research Evidence | Additional Considerations /Explanations |
| <b>Priority of the Problem</b> | Is the problem a priority?                           | <ul style="list-style-type: none"> <li>○ No</li> <li>○ Probably no</li> <li>○ Uncertain</li> <li>○ Probably yes</li> <li>● <b>Yes</b></li> <li>○ Varies</li> </ul>                                                                                                                                                                                                                                                                                                                                                                                                                                                                                                                                                                                                        |                   |                                         |



|                                                 |                                                                                                                                              |                                                                                                                                                                                                                                                                                                         |                                                              |                            |                                          |       |
|-------------------------------------------------|----------------------------------------------------------------------------------------------------------------------------------------------|---------------------------------------------------------------------------------------------------------------------------------------------------------------------------------------------------------------------------------------------------------------------------------------------------------|--------------------------------------------------------------|----------------------------|------------------------------------------|-------|
| <b>Benefits and harms</b><br>(see below)        | Is there important uncertainty or variability in how much patients, researchers, clinicians and stake holders value the main outcomes?       | <ul style="list-style-type: none"> <li>○ Important uncertainty or variability</li> <li>○ Possibly important uncertainty or variability</li> <li>● <b>Probably no important uncertainty of variability</b></li> <li>○ No important uncertainty of variability</li> <li>○ No known undesirable</li> </ul> | <i>Relative importance of the main outcomes of interest:</i> |                            |                                          | None. |
|                                                 |                                                                                                                                              |                                                                                                                                                                                                                                                                                                         | <b>Outcome</b>                                               | <b>Relative Importance</b> | <b>Certainty of the evidence (GRADE)</b> |       |
|                                                 |                                                                                                                                              |                                                                                                                                                                                                                                                                                                         | Rate of falls                                                | Critical                   | ⊕⊕⊕⊕<br>High                             |       |
|                                                 |                                                                                                                                              |                                                                                                                                                                                                                                                                                                         | Risk of falling                                              | Critical                   | ⊕⊕⊕⊕<br>High                             |       |
|                                                 |                                                                                                                                              |                                                                                                                                                                                                                                                                                                         |                                                              |                            | ○○○○<br>MODERATE                         |       |
|                                                 |                                                                                                                                              |                                                                                                                                                                                                                                                                                                         |                                                              |                            | ○○○○<br>MODERATE                         |       |
|                                                 |                                                                                                                                              |                                                                                                                                                                                                                                                                                                         |                                                              |                            | ○○○○<br>MODERATE                         |       |
|                                                 |                                                                                                                                              |                                                                                                                                                                                                                                                                                                         |                                                              |                            | ○○○○<br>MODERATE                         |       |
|                                                 |                                                                                                                                              |                                                                                                                                                                                                                                                                                                         |                                                              |                            | ○○○○<br>MODERATE                         |       |
|                                                 |                                                                                                                                              |                                                                                                                                                                                                                                                                                                         |                                                              |                            | ○○○○<br>MODERATE                         |       |
| What is the overall certainty of this evidence? | <ul style="list-style-type: none"> <li>○ No studies</li> <li>○ Very low</li> <li>○ Low</li> <li>○ Moderate</li> <li>● <b>High</b></li> </ul> |                                                                                                                                                                                                                                                                                                         |                                                              |                            |                                          |       |

|                                                                                                         |                                                                                                                                                                                                                                                       |                                        |                                    |                         |                             |
|---------------------------------------------------------------------------------------------------------|-------------------------------------------------------------------------------------------------------------------------------------------------------------------------------------------------------------------------------------------------------|----------------------------------------|------------------------------------|-------------------------|-----------------------------|
| How substantial are the desirable anticipated effects of the intervention?                              | <ul style="list-style-type: none"> <li>○ Large</li> <li>○ Moderate</li> <li>○ Small</li> <li>● <b>Trivial</b></li> <li>○ Varies</li> <li>○ Don't know</li> </ul>                                                                                      | <b>Summary of findings (GRADE): 1A</b> |                                    |                         | (Cameron et al, 2018)       |
| How substantial are the undesirable anticipated effects of the intervention?                            | <ul style="list-style-type: none"> <li>● <b>Trivial</b></li> <li>○ Small</li> <li>○ Moderate</li> <li>○ Large</li> <li>○ Varies</li> <li>○ Don't know</li> </ul>                                                                                      | <b>Outcome</b>                         | <b>Nº of patients</b>              |                         |                             |
| Does the balance between desirable effects and undesirable effects favour the option of the comparison? | <ul style="list-style-type: none"> <li>○ Favours the option</li> <li>○ Probably favours the option</li> <li>● <b>Does not favour either</b></li> <li>○ Probably favours the comparison</li> <li>○ Favours the comparison</li> <li>○ Varies</li> </ul> | Rate of falls                          | Use of a fall risk-assessment tool | Nurse's judgement alone | RaR = 0.96<br>(0.84 – 1.10) |
|                                                                                                         |                                                                                                                                                                                                                                                       | Risk of falling                        | Use of a fall risk-assessment tool | Nurse's judgement alone | RR = 0.99<br>(0.85 – 1.16)  |
|                                                                                                         |                                                                                                                                                                                                                                                       |                                        |                                    |                         |                             |

|                                                                                                    |                                                                                                                                                                                        |                                                                                                                                                                                                                                                                             |                                                                                                                    |  |
|----------------------------------------------------------------------------------------------------|----------------------------------------------------------------------------------------------------------------------------------------------------------------------------------------|-----------------------------------------------------------------------------------------------------------------------------------------------------------------------------------------------------------------------------------------------------------------------------|--------------------------------------------------------------------------------------------------------------------|--|
| <p style="writing-mode: vertical-rl; transform: rotate(180deg);"><b>Values and preferences</b></p> | <p>Is there similarity about how much patients, researchers, clinicians and stake holders value the main Outcomes?<br/>Also include adverse effects and burden of the intervention</p> | <ul style="list-style-type: none"> <li>○ No</li> <li>○ Probably no</li> <li>○ Uncertain</li> <li>● <b>Probably yes</b></li> <li>○ Yes</li> <li>○ Varies</li> </ul>                                                                                                          |                                                                                                                    |  |
| <p style="writing-mode: vertical-rl; transform: rotate(180deg);"><b>Resources</b></p>              | <p>What is the certainty of the evidence of resources requirements (costs)?</p>                                                                                                        | <ul style="list-style-type: none"> <li>○ No studies</li> <li>○ <b>Very low</b></li> <li>○ Low</li> <li>○ Moderate</li> <li>○ High</li> </ul>                                                                                                                                | <p>Recommends against the use of fall risk screening tools, no added cost associated with this recommendation.</p> |  |
|                                                                                                    | <p>Does the cost effectiveness favour the intervention or the comparison?</p>                                                                                                          | <ul style="list-style-type: none"> <li>○ No studies</li> <li>● <b>Favours the option</b></li> <li>○ Probably favours the option</li> <li>○ Does not favour either</li> <li>○ Probably favours the comparison</li> <li>○ Favours the comparison</li> <li>○ Varies</li> </ul> |                                                                                                                    |  |

|               |                                               |                                                                                                                                                                                                                                                                                                                             |  |  |
|---------------|-----------------------------------------------|-----------------------------------------------------------------------------------------------------------------------------------------------------------------------------------------------------------------------------------------------------------------------------------------------------------------------------|--|--|
| Equity        | What would be the impact on health equity?    | <ul style="list-style-type: none"> <li><input type="radio"/> Increased</li> <li><input type="radio"/> Probably increased</li> <li><input checked="" type="radio"/> <b>Uncertain</b></li> <li><input type="radio"/> Probably reduced</li> <li><input type="radio"/> Reduced</li> <li><input type="radio"/> Varies</li> </ul> |  |  |
| Acceptability | Is the option acceptable to key stakeholders? | <ul style="list-style-type: none"> <li><input type="radio"/> No</li> <li><input type="radio"/> Probably no</li> <li><input type="radio"/> Uncertain</li> <li><input checked="" type="radio"/> <b>Probably yes</b></li> <li><input type="radio"/> Yes</li> <li><input type="radio"/> Varies</li> </ul>                       |  |  |

|                    |                                            |                                                                                                                                                                                                                                                                                                       |  |  |
|--------------------|--------------------------------------------|-------------------------------------------------------------------------------------------------------------------------------------------------------------------------------------------------------------------------------------------------------------------------------------------------------|--|--|
| <b>Feasibility</b> | Is the intervention feasible to implement? | <ul style="list-style-type: none"> <li><input type="radio"/> No</li> <li><input type="radio"/> Probably no</li> <li><input type="radio"/> Uncertain</li> <li><input type="radio"/> Probably yes</li> <li><input checked="" type="radio"/> <b>Yes</b></li> <li><input type="radio"/> Varies</li> </ul> |  |  |
|--------------------|--------------------------------------------|-------------------------------------------------------------------------------------------------------------------------------------------------------------------------------------------------------------------------------------------------------------------------------------------------------|--|--|

**Should \_\_\_ be recommended for older adults to prevent and manage falls?**

| Type of recommendation        | Strong recommendation against the intervention<br><input type="radio"/>                                                                                                                                                                                                                                                                                                                                                                                                                                                                                                                                                                                                                                                                                                                                                                                                                                | Weak recommendation against the intervention<br><input type="radio"/> | Conditional recommendation for either the intervention or the comparison<br><input type="radio"/> | Weak recommendation for the intervention<br><input type="radio"/> | Strong recommendation for the intervention<br><input checked="" type="radio"/> |
|-------------------------------|--------------------------------------------------------------------------------------------------------------------------------------------------------------------------------------------------------------------------------------------------------------------------------------------------------------------------------------------------------------------------------------------------------------------------------------------------------------------------------------------------------------------------------------------------------------------------------------------------------------------------------------------------------------------------------------------------------------------------------------------------------------------------------------------------------------------------------------------------------------------------------------------------------|-----------------------------------------------------------------------|---------------------------------------------------------------------------------------------------|-------------------------------------------------------------------|--------------------------------------------------------------------------------|
| Recommendation                | Recommendation 1: We recommend against falls risk screening to identify care home residents at risk for falls, since all residents should be considered at high risk of falls. GRADE: 1A                                                                                                                                                                                                                                                                                                                                                                                                                                                                                                                                                                                                                                                                                                               |                                                                       |                                                                                                   |                                                                   |                                                                                |
| Justification                 | There is often confusion between the terms “fall risk screening” and “fall risk assessment” in literature. Screening can be defined as “a process that primarily aims to identify people at increased risk of falls”, whereas assessment can be described as “a process that aims to identify factors that increase the risk of a fall that can be dealt with by subsequent interventions.” (Close & Lord, 2011) There is no evidence that falls risk screening can successfully identify nursing home residents at risk for falls. And because almost all residents have an increased risk of falling and therefore almost all would benefit from a multifactorial falls risk assessment for fall prevention, staff should invest their scarce time in multifactorial falls risk assessments and interventions instead of screening, starting with residents who have a fall history. (Vlaeyen, 2021) |                                                                       |                                                                                                   |                                                                   |                                                                                |
| Subgroup considerations       | Not applicable.                                                                                                                                                                                                                                                                                                                                                                                                                                                                                                                                                                                                                                                                                                                                                                                                                                                                                        |                                                                       |                                                                                                   |                                                                   |                                                                                |
| Implementation considerations | Not applicable.                                                                                                                                                                                                                                                                                                                                                                                                                                                                                                                                                                                                                                                                                                                                                                                                                                                                                        |                                                                       |                                                                                                   |                                                                   |                                                                                |
| Monitoring and evaluation     | Not applicable.                                                                                                                                                                                                                                                                                                                                                                                                                                                                                                                                                                                                                                                                                                                                                                                                                                                                                        |                                                                       |                                                                                                   |                                                                   |                                                                                |
| Research Priorities           | Because current methods have insufficient psychometric properties to predict falls among residents, there is an urgent need for accurate tools. More research on identifying residents with the highest fall risk is warranted, as these residents benefit the most from multifactorial falls risk assessments and subsequent tailored interventions. Innovative technologies may facilitate new perspectives. Therefore, future studies could focus on developing and evaluating smart technologies. In addition, many screening tools are being developed, but too few are validated in different settings, especially nursing homes. (Vlaeyen et al., 2021)                                                                                                                                                                                                                                         |                                                                       |                                                                                                   |                                                                   |                                                                                |

## Recommendations for Working Group 5: Falls in Nursing Homes

**Recommendation 2 (Care home assessment): We recommend performing a multifactorial falls risk assessment at admission to identify factors contributing to fall risk and implementing appropriate interventions to avoid falls and fall-related injuries in care home older adults. GRADE: 1C.**

| <b>Population:</b>      | Older adults $\geq 65$ years of age  | <b>Objective:</b> <i>The objective was to review the literature to evaluate the effectiveness of falls prevention assessment and interventions on reducing the rate and risk of falling in nursing homes.</i> |                   |                                         |
|-------------------------|--------------------------------------|---------------------------------------------------------------------------------------------------------------------------------------------------------------------------------------------------------------|-------------------|-----------------------------------------|
| <b>Intervention:</b>    | Multifactorial falls risk assessment |                                                                                                                                                                                                               |                   |                                         |
| <b>Comparison:</b>      | Standard care                        |                                                                                                                                                                                                               |                   |                                         |
| <b>Main outcomes:</b>   | Falls                                |                                                                                                                                                                                                               |                   |                                         |
| <b>Setting:</b>         | Nursing homes                        |                                                                                                                                                                                                               |                   |                                         |
| <b>Perspective:</b>     | Nursing home population              |                                                                                                                                                                                                               |                   |                                         |
| Decision Domain         |                                      | Judgements                                                                                                                                                                                                    | Research Evidence | Additional Considerations /Explanations |
| Priority of the Problem | Is the problem a priority?           | <ul style="list-style-type: none"> <li>○ No</li> <li>○ Probably no</li> <li>○ Uncertain</li> <li>○ Probably yes</li> <li>● Yes</li> <li>○ Varies</li> </ul>                                                   |                   |                                         |

|                                                 |                                                                                                                                              |                                                                                                                                                                                                                                                                                                         |                                                              |                            |                                          |       |
|-------------------------------------------------|----------------------------------------------------------------------------------------------------------------------------------------------|---------------------------------------------------------------------------------------------------------------------------------------------------------------------------------------------------------------------------------------------------------------------------------------------------------|--------------------------------------------------------------|----------------------------|------------------------------------------|-------|
| <b>Benefits and harms</b><br>(see below)        | Is there Important uncertainty or variability in how much patients, researchers, clinicians and stake holders value the main outcomes?       | <ul style="list-style-type: none"> <li>○ Important uncertainty or variability</li> <li>○ Possibly important uncertainty or variability</li> <li>● <b>Probably no important uncertainty of variability</b></li> <li>○ No important uncertainty of variability</li> <li>○ No known undesirable</li> </ul> | <i>Relative importance of the main outcomes of interest:</i> |                            |                                          | None. |
|                                                 |                                                                                                                                              |                                                                                                                                                                                                                                                                                                         | <b>Outcome</b>                                               | <b>Relative Importance</b> | <b>Certainty of the evidence (GRADE)</b> |       |
|                                                 |                                                                                                                                              |                                                                                                                                                                                                                                                                                                         | Falls                                                        | Critical                   | ⊕⊕⊕○<br>MODERATE                         |       |
|                                                 |                                                                                                                                              |                                                                                                                                                                                                                                                                                                         |                                                              |                            | ○○○○<br>MODERATE                         |       |
|                                                 |                                                                                                                                              |                                                                                                                                                                                                                                                                                                         |                                                              |                            | ○○○○<br>MODERATE                         |       |
|                                                 |                                                                                                                                              |                                                                                                                                                                                                                                                                                                         |                                                              |                            | ○○○○<br>MODERATE                         |       |
|                                                 |                                                                                                                                              |                                                                                                                                                                                                                                                                                                         |                                                              |                            | ○○○○<br>MODERATE                         |       |
|                                                 |                                                                                                                                              |                                                                                                                                                                                                                                                                                                         |                                                              |                            | ○○○○<br>MODERATE                         |       |
|                                                 |                                                                                                                                              |                                                                                                                                                                                                                                                                                                         |                                                              |                            | ○○○○<br>MODERATE                         |       |
|                                                 |                                                                                                                                              |                                                                                                                                                                                                                                                                                                         |                                                              |                            | ○○○○<br>MODERATE                         |       |
| What is the overall certainty of this evidence? | <ul style="list-style-type: none"> <li>○ No studies</li> <li>○ Very low</li> <li>○ Low</li> <li>● <b>Moderate</b></li> <li>○ High</li> </ul> |                                                                                                                                                                                                                                                                                                         |                                                              |                            |                                          |       |

|                                                                                                         |                                                                                                                                                                                                                                                       |                                            |                       |                            |  |                                     |
|---------------------------------------------------------------------------------------------------------|-------------------------------------------------------------------------------------------------------------------------------------------------------------------------------------------------------------------------------------------------------|--------------------------------------------|-----------------------|----------------------------|--|-------------------------------------|
| How substantial are the desirable anticipated effects of the intervention?                              | <ul style="list-style-type: none"> <li>○ Large</li> <li>● <b>Moderate</b></li> <li>○ Small</li> <li>○ Trivial</li> <li>○ Varies</li> <li>○ Don't know</li> </ul>                                                                                      | <i>Summary of findings (GRADE): 1C</i>     |                       |                            |  |                                     |
|                                                                                                         |                                                                                                                                                                                                                                                       | <b>Outcome</b>                             | <b>Nº of patients</b> |                            |  | <b>Effect</b>                       |
|                                                                                                         |                                                                                                                                                                                                                                                       |                                            | <b>Intervention</b>   | <b>Control</b>             |  | <b>Relative / Absolute (95% CI)</b> |
| How substantial are the undesirable anticipated effects of the intervention?                            | <ul style="list-style-type: none"> <li>● <b>Trivial</b></li> <li>○ Small</li> <li>○ Moderate</li> <li>○ Large</li> <li>○ Varies</li> <li>○ Don't know</li> </ul>                                                                                      | Number of falls (multidomain intervention) |                       | RR = 0.65<br>(0.45 – 0.94) |  |                                     |
| Does the balance between desirable effects and undesirable effects favour the option of the comparison? | <ul style="list-style-type: none"> <li>○ Favours the option</li> <li>● <b>Probably favours the option</b></li> <li>○ Does not favour either</li> <li>○ Probably favours the comparison</li> <li>○ Favours the comparison</li> <li>○ Varies</li> </ul> |                                            |                       |                            |  |                                     |



|                                                                        |                                                                                                                                                                             |                                                                                                                                                                                                                                                                             |                                                                                                                                              |  |
|------------------------------------------------------------------------|-----------------------------------------------------------------------------------------------------------------------------------------------------------------------------|-----------------------------------------------------------------------------------------------------------------------------------------------------------------------------------------------------------------------------------------------------------------------------|----------------------------------------------------------------------------------------------------------------------------------------------|--|
| Values and preferences                                                 | Is there similarity about how much patients, researchers, clinicians and stake holders value the main Outcomes? Also include adverse effects and burden of the intervention | <ul style="list-style-type: none"> <li>○ No</li> <li>○ Probably no</li> <li>○ Uncertain</li> <li>● <b>Probably yes</b></li> <li>○ Yes</li> <li>○ Varies</li> </ul>                                                                                                          |                                                                                                                                              |  |
|                                                                        | Resources                                                                                                                                                                   | What is the certainty of the evidence of resources requirements (costs)?                                                                                                                                                                                                    | <ul style="list-style-type: none"> <li>● <b>No studies</b></li> <li>○ Very low</li> <li>○ Low</li> <li>○ Moderate</li> <li>○ High</li> </ul> |  |
| Does the cost effectiveness favour the intervention or the comparison? |                                                                                                                                                                             | <ul style="list-style-type: none"> <li>● <b>No studies</b></li> <li>○ Favours the option</li> <li>○ Probably favours the option</li> <li>○ Does not favour either</li> <li>○ Probably favours the comparison</li> <li>○ Favours the comparison</li> <li>○ Varies</li> </ul> |                                                                                                                                              |  |

|               |                                               |                                                                                                                                                                                                                                                                                                                             |  |  |
|---------------|-----------------------------------------------|-----------------------------------------------------------------------------------------------------------------------------------------------------------------------------------------------------------------------------------------------------------------------------------------------------------------------------|--|--|
| Equity        | What would be the impact on health equity?    | <ul style="list-style-type: none"> <li><input type="radio"/> Increased</li> <li><input type="radio"/> Probably increased</li> <li><input checked="" type="radio"/> <b>Uncertain</b></li> <li><input type="radio"/> Probably reduced</li> <li><input type="radio"/> Reduced</li> <li><input type="radio"/> Varies</li> </ul> |  |  |
| Acceptability | Is the option acceptable to key stakeholders? | <ul style="list-style-type: none"> <li><input type="radio"/> No</li> <li><input type="radio"/> Probably no</li> <li><input type="radio"/> Uncertain</li> <li><input checked="" type="radio"/> <b>Probably yes</b></li> <li><input type="radio"/> Yes</li> <li><input type="radio"/> Varies</li> </ul>                       |  |  |

|             |                                            |                                                                                                                                                                                                                                                                                                       |  |  |
|-------------|--------------------------------------------|-------------------------------------------------------------------------------------------------------------------------------------------------------------------------------------------------------------------------------------------------------------------------------------------------------|--|--|
| Feasibility | Is the intervention feasible to implement? | <ul style="list-style-type: none"> <li><input type="radio"/> No</li> <li><input type="radio"/> Probably no</li> <li><input type="radio"/> Uncertain</li> <li><input checked="" type="radio"/> <b>Probably yes</b></li> <li><input type="radio"/> Yes</li> <li><input type="radio"/> Varies</li> </ul> |  |  |
|-------------|--------------------------------------------|-------------------------------------------------------------------------------------------------------------------------------------------------------------------------------------------------------------------------------------------------------------------------------------------------------|--|--|

**Should \_\_\_ be recommended for older adults to prevent and manage falls?**

| Type of recommendation        | Strong recommendation against the intervention<br><input type="radio"/>                                                                                                                                                                                                                                                                                                                                                                                                                                                                                                                                                                                                                                                                                                                                                                                                                                                                                                                                                                                                                                                                                                                                                                                                                                                                                                                                                                                                                                                                                                                                                                                                                                                                                                                                | Weak recommendation against the intervention<br><input type="radio"/> | Conditional recommendation for either the intervention or the comparison<br><input type="radio"/> | Weak recommendation for the intervention<br><input type="radio"/> | Strong recommendation for the intervention<br><input checked="" type="radio"/> |
|-------------------------------|--------------------------------------------------------------------------------------------------------------------------------------------------------------------------------------------------------------------------------------------------------------------------------------------------------------------------------------------------------------------------------------------------------------------------------------------------------------------------------------------------------------------------------------------------------------------------------------------------------------------------------------------------------------------------------------------------------------------------------------------------------------------------------------------------------------------------------------------------------------------------------------------------------------------------------------------------------------------------------------------------------------------------------------------------------------------------------------------------------------------------------------------------------------------------------------------------------------------------------------------------------------------------------------------------------------------------------------------------------------------------------------------------------------------------------------------------------------------------------------------------------------------------------------------------------------------------------------------------------------------------------------------------------------------------------------------------------------------------------------------------------------------------------------------------------|-----------------------------------------------------------------------|---------------------------------------------------------------------------------------------------|-------------------------------------------------------------------|--------------------------------------------------------------------------------|
| Recommendation                | Recommendation 2: We recommend performing a multifactorial falls risk assessment at admission to identify factors contributing to fall risk and implementing appropriate interventions to avoid falls and fall-related injuries in care home older adults. GRADE: 1C.                                                                                                                                                                                                                                                                                                                                                                                                                                                                                                                                                                                                                                                                                                                                                                                                                                                                                                                                                                                                                                                                                                                                                                                                                                                                                                                                                                                                                                                                                                                                  |                                                                       |                                                                                                   |                                                                   |                                                                                |
| Justification                 | Whilst there is a lack of firm evidence that a multifactorial falls risk assessment and multidomain interventions can successfully reduce the rate and risk of falling in nursing homes, incorporating such a multifactorial falls risk assessment and intervention, where appropriate, is warranted.                                                                                                                                                                                                                                                                                                                                                                                                                                                                                                                                                                                                                                                                                                                                                                                                                                                                                                                                                                                                                                                                                                                                                                                                                                                                                                                                                                                                                                                                                                  |                                                                       |                                                                                                   |                                                                   |                                                                                |
| Subgroup considerations       | Falls prevention interventions for residents with cognitive impairment should be implemented in consultation with the resident and his family members/caregivers.<br>For palliative care residents, recommendation 2 is not endorsed.                                                                                                                                                                                                                                                                                                                                                                                                                                                                                                                                                                                                                                                                                                                                                                                                                                                                                                                                                                                                                                                                                                                                                                                                                                                                                                                                                                                                                                                                                                                                                                  |                                                                       |                                                                                                   |                                                                   |                                                                                |
| Implementation considerations | <p>Successful implementation of fall prevention depends on many factors across different healthcare levels. Interventions that assess and take account of the care home context and which empower care home staff and organisations as partners in design and implementation” seems needed. (Logan et al. 2022)</p> <p>The focus of implementation interventions should be on modifiable barriers and facilitators such as communication, knowledge, and skills. Effective fall prevention must consist of multidomain interventions that target each resident’s fall risk profile and should be tailored to overcome context-specific barriers and put into action the identified facilitators. (Vlaeyen et al. 2017)</p> <p>Development of supporting structured tools, such as an implementation plan for fall prevention, could potentially improve the implementation of fall prevention assessment and intervention strategies. (Poels et al. to be submitted)</p> <p>Fall prevention interventions need to incorporate the older person’s beliefs and attitudes towards falls and their management when developing an agreed care plan with them and/or their caregivers.</p> <ul style="list-style-type: none"> <li>• “Guide to Action Care Home” (GtACH) Tool. (Logan, 2019&amp;2021; Robertson, 2012; Walker, 2016)</li> <li>• Logan et al. (2022) confirmed that an intervention, which includes awareness-raising, education, decision, and implementation support, could be a cost-effective way to reduce fall rate in nursing homes without decreasing activity of increasing dependency in residents. The authors state that it is possible that the intervention succeeded because of its comprehensiveness, the empowerment and recognition of the pivotal role played by</li> </ul> |                                                                       |                                                                                                   |                                                                   |                                                                                |

|                           |                                                                                                                                                                                                                                                                                                                                                                                                                                                                                                                                                                                                                                                                                                                                                                                                                                                                                                                                                                                                                                                                                                                                                                                                           |
|---------------------------|-----------------------------------------------------------------------------------------------------------------------------------------------------------------------------------------------------------------------------------------------------------------------------------------------------------------------------------------------------------------------------------------------------------------------------------------------------------------------------------------------------------------------------------------------------------------------------------------------------------------------------------------------------------------------------------------------------------------------------------------------------------------------------------------------------------------------------------------------------------------------------------------------------------------------------------------------------------------------------------------------------------------------------------------------------------------------------------------------------------------------------------------------------------------------------------------------------------|
|                           | <p>care home staff in designing, implementing, and delivering the program. “Evidence Booster: Best Practice Guideline Implementation and Estimated Cost Savings”, RNAO, <a href="https://rnao.ca/bpg/resources/evidence-booster-best-practice-guideline-implementation-and-estimated-cost-savings">https://rnao.ca/bpg/resources/evidence-booster-best-practice-guideline-implementation-and-estimated-cost-savings</a></p> <ul style="list-style-type: none"> <li>• “Evidence Booster: Best Practice Guideline Implementation to Reduce Falls in Older Adults”, RNAO, <a href="https://rnao.ca/bpg/resources/evidence-booster-best-practice-guideline-implementation-reduce-falls-older-adults">https://rnao.ca/bpg/resources/evidence-booster-best-practice-guideline-implementation-reduce-falls-older-adults</a></li> <li>• Evaluation of the Guide to Action Care Home fall prevention programme in care homes for older people: protocol for a multicenter, single-blinded, cluster randomised controlled trial (FinCH), <a href="https://www.nottingham.ac.uk/emran/documents/issue-25-emran-feb-2019.pdf">https://www.nottingham.ac.uk/emran/documents/issue-25-emran-feb-2019.pdf</a></li> </ul> |
| Monitoring and evaluation | <p>We recommend performing a multifactorial falls risk assessment at admission to identify factors contributing to fall risk and determine appropriate interventions and follow-up measures to avoid falls and fall-related injuries. This assessment should be repeated at least once annually or when the residents’ condition changes and based on resource availability in each setting.</p>                                                                                                                                                                                                                                                                                                                                                                                                                                                                                                                                                                                                                                                                                                                                                                                                          |
| Research Priorities       | <p>More research on fall prevention interventions is needed that include people with cognitive impairment and dementia is to improve the generalizability of these interventions to the typical nursing home resident. (Gulka, 2020)</p>                                                                                                                                                                                                                                                                                                                                                                                                                                                                                                                                                                                                                                                                                                                                                                                                                                                                                                                                                                  |

## Recommendations for Working Group 5: Falls in Nursing Homes

**Recommendation 3 (Care home assessment):** We recommend conducting a post-fall assessment in care home residents following a fall in order to identify the mechanism of the falls, any resulting injuries, to reassess the resident's fall risk factors, adjust the intervention strategy for the resident and avoid unnecessary transfer to hospital. **GRADE: E**

| <b>Population:</b>             | Older adults $\geq 65$ years of age | <i>Objective: The objective was to review the literature to assess what interventions or processes should occur immediately following a fall in nursing home residents.</i> |                   |                                         |
|--------------------------------|-------------------------------------|-----------------------------------------------------------------------------------------------------------------------------------------------------------------------------|-------------------|-----------------------------------------|
| <b>Intervention:</b>           | Post-fall assessment                |                                                                                                                                                                             |                   |                                         |
| <b>Comparison:</b>             | N/A                                 |                                                                                                                                                                             |                   |                                         |
| <b>Main outcomes:</b>          | Falls                               |                                                                                                                                                                             |                   |                                         |
| <b>Setting:</b>                | Care homes                          |                                                                                                                                                                             |                   |                                         |
| <b>Perspective:</b>            | Care home population                |                                                                                                                                                                             |                   |                                         |
| Decision Domain                |                                     | Judgements                                                                                                                                                                  | Research Evidence | Additional Considerations /Explanations |
| <b>Priority of the Problem</b> | Is the problem a priority?          | <ul style="list-style-type: none"> <li>○ No</li> <li>○ Probably no</li> <li>○ Uncertain</li> <li>○ Probably yes</li> <li>● <b>Yes</b></li> <li>○ Varies</li> </ul>          |                   |                                         |

|                                                 |                                                                                                                                              |                                                                                                                                                                                                                                                                                                         |                                                              |                            |                                          |       |
|-------------------------------------------------|----------------------------------------------------------------------------------------------------------------------------------------------|---------------------------------------------------------------------------------------------------------------------------------------------------------------------------------------------------------------------------------------------------------------------------------------------------------|--------------------------------------------------------------|----------------------------|------------------------------------------|-------|
| <b>Benefits and harms</b><br>(see below)        | Is there Important uncertainty or variability in how much patients, researchers, clinicians and stake holders value the main outcomes?       | <ul style="list-style-type: none"> <li>○ Important uncertainty or variability</li> <li>○ Possibly important uncertainty or variability</li> <li>● <b>Probably no important uncertainty of variability</b></li> <li>○ No important uncertainty of variability</li> <li>○ No known undesirable</li> </ul> | <i>Relative importance of the main outcomes of interest:</i> |                            |                                          | None. |
|                                                 |                                                                                                                                              |                                                                                                                                                                                                                                                                                                         | <b>Outcome</b>                                               | <b>Relative Importance</b> | <b>Certainty of the evidence (GRADE)</b> |       |
|                                                 |                                                                                                                                              |                                                                                                                                                                                                                                                                                                         | Falls                                                        | Critical                   | ○○○○<br>N/A                              |       |
|                                                 |                                                                                                                                              |                                                                                                                                                                                                                                                                                                         |                                                              |                            | ○○○○<br>MODERATE                         |       |
|                                                 |                                                                                                                                              |                                                                                                                                                                                                                                                                                                         |                                                              |                            | ○○○○<br>MODERATE                         |       |
|                                                 |                                                                                                                                              |                                                                                                                                                                                                                                                                                                         |                                                              |                            | ○○○○<br>MODERATE                         |       |
|                                                 |                                                                                                                                              |                                                                                                                                                                                                                                                                                                         |                                                              |                            | ○○○○<br>MODERATE                         |       |
|                                                 |                                                                                                                                              |                                                                                                                                                                                                                                                                                                         |                                                              |                            | ○○○○<br>MODERATE                         |       |
|                                                 |                                                                                                                                              |                                                                                                                                                                                                                                                                                                         |                                                              |                            | ○○○○<br>MODERATE                         |       |
|                                                 |                                                                                                                                              |                                                                                                                                                                                                                                                                                                         |                                                              |                            | ○○○○<br>MODERATE                         |       |
| What is the overall certainty of this evidence? | <ul style="list-style-type: none"> <li>● <b>No studies</b></li> <li>○ Very low</li> <li>○ Low</li> <li>○ Moderate</li> <li>○ High</li> </ul> |                                                                                                                                                                                                                                                                                                         |                                                              |                            |                                          |       |

|                                                                                                         |                                                                                                                                                                                                                                                       |                                                                              |                                                                                                                                                                  |                |                                                                                                                                |                                     |
|---------------------------------------------------------------------------------------------------------|-------------------------------------------------------------------------------------------------------------------------------------------------------------------------------------------------------------------------------------------------------|------------------------------------------------------------------------------|------------------------------------------------------------------------------------------------------------------------------------------------------------------|----------------|--------------------------------------------------------------------------------------------------------------------------------|-------------------------------------|
| How substantial are the desirable anticipated effects of the intervention?                              | <ul style="list-style-type: none"> <li>○ Large</li> <li>○ Moderate</li> <li>○ Small</li> <li>○ Trivial</li> <li>○ Varies</li> <li>● <b>Don't know</b></li> </ul>                                                                                      | <b>Summary of findings (GRADE):</b>                                          |                                                                                                                                                                  |                | No evidence provided, only guidelines (RNAO, 2017 & EVV, 2022) on steps to perform was included to support the recommendation. |                                     |
|                                                                                                         |                                                                                                                                                                                                                                                       | <b>Outcome</b>                                                               | <b>Nº of patients</b>                                                                                                                                            |                |                                                                                                                                | <b>Effect</b>                       |
|                                                                                                         |                                                                                                                                                                                                                                                       |                                                                              | <b>Intervention</b>                                                                                                                                              | <b>Control</b> |                                                                                                                                | <b>Relative / Absolute (95% CI)</b> |
|                                                                                                         |                                                                                                                                                                                                                                                       | How substantial are the undesirable anticipated effects of the intervention? | <ul style="list-style-type: none"> <li>○ Trivial</li> <li>○ Small</li> <li>○ Moderate</li> <li>○ Large</li> <li>○ Varies</li> <li>● <b>Don't know</b></li> </ul> |                |                                                                                                                                |                                     |
|                                                                                                         |                                                                                                                                                                                                                                                       |                                                                              |                                                                                                                                                                  |                |                                                                                                                                |                                     |
| Does the balance between desirable effects and undesirable effects favour the option of the comparison? | <ul style="list-style-type: none"> <li>○ Favours the option</li> <li>○ Probably favours the option</li> <li>● <b>Does not favour either</b></li> <li>○ Probably favours the comparison</li> <li>○ Favours the comparison</li> <li>○ Varies</li> </ul> |                                                                              |                                                                                                                                                                  |                |                                                                                                                                |                                     |

|                                                                        |                                                                                                                                                                             |                                                                                                                                                                                                                                                                      |                                                                                                                                       |  |
|------------------------------------------------------------------------|-----------------------------------------------------------------------------------------------------------------------------------------------------------------------------|----------------------------------------------------------------------------------------------------------------------------------------------------------------------------------------------------------------------------------------------------------------------|---------------------------------------------------------------------------------------------------------------------------------------|--|
| Values and preferences                                                 | Is there similarity about how much patients, researchers, clinicians and stake holders value the main Outcomes? Also include adverse effects and burden of the intervention | <ul style="list-style-type: none"> <li>○ No</li> <li>○ Probably no</li> <li>○ Uncertain</li> <li>● <b>Probably yes</b></li> <li>○ Yes</li> <li>○ Varies</li> </ul>                                                                                                   |                                                                                                                                       |  |
|                                                                        | Resources                                                                                                                                                                   | What is the certainty of the evidence of resources requirements (costs)?                                                                                                                                                                                             | <ul style="list-style-type: none"> <li>● No studies</li> <li>○ Very low</li> <li>○ Low</li> <li>○ Moderate</li> <li>○ High</li> </ul> |  |
| Does the cost effectiveness favour the intervention or the comparison? |                                                                                                                                                                             | <ul style="list-style-type: none"> <li>● No studies</li> <li>○ Favours the option</li> <li>○ Probably favours the option</li> <li>○ Does not favour either</li> <li>○ Probably favours the comparison</li> <li>○ Favours the comparison</li> <li>○ Varies</li> </ul> |                                                                                                                                       |  |



|               |                                               |                                                                                                                                                                                                                                                                                                                      |  |  |
|---------------|-----------------------------------------------|----------------------------------------------------------------------------------------------------------------------------------------------------------------------------------------------------------------------------------------------------------------------------------------------------------------------|--|--|
| Equity        | What would be the impact on health equity?    | <ul style="list-style-type: none"> <li><input type="radio"/> Increased</li> <li><input type="radio"/> Probably increased</li> <li><input checked="" type="radio"/> Uncertain</li> <li><input type="radio"/> Probably reduced</li> <li><input type="radio"/> Reduced</li> <li><input type="radio"/> Varies</li> </ul> |  |  |
| Acceptability | Is the option acceptable to key stakeholders? | <ul style="list-style-type: none"> <li><input type="radio"/> No</li> <li><input type="radio"/> Probably no</li> <li><input type="radio"/> Uncertain</li> <li><input checked="" type="radio"/> <b>Probably yes</b></li> <li><input type="radio"/> Yes</li> <li><input type="radio"/> Varies</li> </ul>                |  |  |

|             |                                            |                                                                                                                                                                    |  |  |
|-------------|--------------------------------------------|--------------------------------------------------------------------------------------------------------------------------------------------------------------------|--|--|
| Feasibility | Is the intervention feasible to implement? | <ul style="list-style-type: none"> <li>○ No</li> <li>○ Probably no</li> <li>○ Uncertain</li> <li>● <b>Probably yes</b></li> <li>○ Yes</li> <li>○ Varies</li> </ul> |  |  |
|-------------|--------------------------------------------|--------------------------------------------------------------------------------------------------------------------------------------------------------------------|--|--|

**Should conducting a post-fall assessment in order to avoid unnecessary transfer to acute care following a fall in nursing home residents be recommended for older adults to prevent and manage falls?**

| Type of recommendation        | Strong recommendation against the intervention<br>○                                                                                                                                                                                                                                                                                                                                                                                                                                                                                                                                                                                                                                                                                                                                                                                                                                                                                                                                                                                                                                                                                                                                                                                                                                                                                                                                                                                                                                                                                                                                                                                                                                                                                                                                                                                        | Weak recommendation against the intervention<br>○ | Conditional recommendation for either the intervention or the comparison<br>○ | Weak recommendation for the intervention<br>○ | Strong recommendation for the intervention<br>● |
|-------------------------------|--------------------------------------------------------------------------------------------------------------------------------------------------------------------------------------------------------------------------------------------------------------------------------------------------------------------------------------------------------------------------------------------------------------------------------------------------------------------------------------------------------------------------------------------------------------------------------------------------------------------------------------------------------------------------------------------------------------------------------------------------------------------------------------------------------------------------------------------------------------------------------------------------------------------------------------------------------------------------------------------------------------------------------------------------------------------------------------------------------------------------------------------------------------------------------------------------------------------------------------------------------------------------------------------------------------------------------------------------------------------------------------------------------------------------------------------------------------------------------------------------------------------------------------------------------------------------------------------------------------------------------------------------------------------------------------------------------------------------------------------------------------------------------------------------------------------------------------------|---------------------------------------------------|-------------------------------------------------------------------------------|-----------------------------------------------|-------------------------------------------------|
| Recommendation                | Recommendation 3: We recommend conducting a post-fall assessment in care home residents following a fall in order to identify the mechanism of the fall, any resulting injuries, to reassess the resident’s fall risk factors, adjust the intervention strategy for the resident and avoid unnecessary transfer to hospital. GRADE: E                                                                                                                                                                                                                                                                                                                                                                                                                                                                                                                                                                                                                                                                                                                                                                                                                                                                                                                                                                                                                                                                                                                                                                                                                                                                                                                                                                                                                                                                                                      |                                                   |                                                                               |                                               |                                                 |
| Justification                 | Although there is little evidence for this recommendation, the working group considered this an important recommendation based on expert consensus.                                                                                                                                                                                                                                                                                                                                                                                                                                                                                                                                                                                                                                                                                                                                                                                                                                                                                                                                                                                                                                                                                                                                                                                                                                                                                                                                                                                                                                                                                                                                                                                                                                                                                        |                                                   |                                                                               |                                               |                                                 |
| Subgroup considerations       | Not applicable.                                                                                                                                                                                                                                                                                                                                                                                                                                                                                                                                                                                                                                                                                                                                                                                                                                                                                                                                                                                                                                                                                                                                                                                                                                                                                                                                                                                                                                                                                                                                                                                                                                                                                                                                                                                                                            |                                                   |                                                                               |                                               |                                                 |
| Implementation considerations | <ul style="list-style-type: none"> <li>● AHRQ (Agency for Healthcare Research and Quality). The Falls Management Program: A Quality Improvement Initiative for Nursing Facilities: Chapter 2 Fall response. <a href="https://www.ahrq.gov/patient-safety/settings/long-term-care/resource/injuries/fallsp/2018/man2.html">https://www.ahrq.gov/patient-safety/settings/long-term-care/resource/injuries/fallsp/2018/man2.html</a></li> <li>● “Evidence Booster: Best Practice Guideline Implementation and Estimated Cost Savings”, RNAO, <a href="https://mao.ca/bpg/resources/evidence-booster-best-practice-guideline-implementation-and-estimated-cost-savings">https://mao.ca/bpg/resources/evidence-booster-best-practice-guideline-implementation-and-estimated-cost-savings</a></li> <li>● Examples of post-fall assessments: <ul style="list-style-type: none"> <li>○ “Falls Debriefing and Action Plan from St. Joseph’s Healthcare Hamilton (Ontario, Canada)”. (RNAO, 2017. Appendix J.)</li> <li>○ “Post fall protocol for Hampshire County Council Adult Services (NHS England)”. <a href="https://www.nhs.uk/NHSEngland/keogh-review/Documents/quick-guides/background-docs/4-Hampshire%20falls%20protocol.pdf">https://www.nhs.uk/NHSEngland/keogh-review/Documents/quick-guides/background-docs/4-Hampshire%20falls%20protocol.pdf</a></li> </ul> </li> </ul> <p>Post fall multidisciplinary management guidelines for Western Australian Health Care Settings, 2018. <a href="https://www.osrecruitment.health.wa.gov.au/-/media/Files/Corporate/general-documents/Health-Networks/Falls-prevention/WA-Post-Fall-Guidelines_Final_2018_PDF.pdf">https://www.osrecruitment.health.wa.gov.au/-/media/Files/Corporate/general-documents/Health-Networks/Falls-prevention/WA-Post-Fall-Guidelines_Final_2018_PDF.pdf</a></p> |                                                   |                                                                               |                                               |                                                 |
| Monitoring and evaluation     | A post-fall assessment should be provided after every fall incident in order to avoid unnecessary transfer to acute care following a fall in nursing home residents.                                                                                                                                                                                                                                                                                                                                                                                                                                                                                                                                                                                                                                                                                                                                                                                                                                                                                                                                                                                                                                                                                                                                                                                                                                                                                                                                                                                                                                                                                                                                                                                                                                                                       |                                                   |                                                                               |                                               |                                                 |

|                     |                                                                                     |
|---------------------|-------------------------------------------------------------------------------------|
| Research Priorities | More research is needed regarding the exact content of such a post-fall assessment. |
|---------------------|-------------------------------------------------------------------------------------|

## Recommendations for Working Group 5: Falls in Hospitals and Nursing Homes

**Recommendation 1 (Care Homes Management and Interventions): We recommend a multifaceted approach to falls reduction for care home residents including care home staff training, systematic use of a multidomain decision support tool and implementation of falls prevention actions. GRADE: 1B**

| <i>Population:</i>      |                            | <i>Objective:</i>                                                                                                                                           |                                                                                          |                                         |
|-------------------------|----------------------------|-------------------------------------------------------------------------------------------------------------------------------------------------------------|------------------------------------------------------------------------------------------|-----------------------------------------|
| <i>Intervention:</i>    |                            |                                                                                                                                                             |                                                                                          |                                         |
| <i>Comparison:</i>      |                            |                                                                                                                                                             |                                                                                          |                                         |
| <i>Main outcomes:</i>   |                            |                                                                                                                                                             |                                                                                          |                                         |
| <i>Setting:</i>         |                            |                                                                                                                                                             |                                                                                          |                                         |
| <i>Perspective:</i>     |                            |                                                                                                                                                             |                                                                                          |                                         |
| Decision Domain         |                            | Judgements                                                                                                                                                  | Research Evidence                                                                        | Additional Considerations /Explanations |
| Priority of the Problem | Is the problem a priority? | <ul style="list-style-type: none"> <li>○ No</li> <li>○ Probably no</li> <li>○ Uncertain</li> <li>○ Probably yes</li> <li>○ Yes</li> <li>○ Varies</li> </ul> | <b>Based on expert opinion, No supporting evidence provided for this recommendation.</b> |                                         |

|                                                 |                                                                                                                                        |                                                                                                                                                                                                                                                                                                  |                                                              |                            |                                          |       |
|-------------------------------------------------|----------------------------------------------------------------------------------------------------------------------------------------|--------------------------------------------------------------------------------------------------------------------------------------------------------------------------------------------------------------------------------------------------------------------------------------------------|--------------------------------------------------------------|----------------------------|------------------------------------------|-------|
| <b>Benefits and harms</b><br>(see below)        | Is there important uncertainty or variability in how much patients, researchers, clinicians and stake holders value the main outcomes? | <ul style="list-style-type: none"> <li>○ Important uncertainty or variability</li> <li>○ Possibly important uncertainty or variability</li> <li>○ Probably no important uncertainty of variability</li> <li>○ No important uncertainty of variability</li> <li>○ No known undesirable</li> </ul> | <i>Relative importance of the main outcomes of interest:</i> |                            |                                          | None. |
|                                                 |                                                                                                                                        |                                                                                                                                                                                                                                                                                                  | <b>Outcome</b>                                               | <b>Relative Importance</b> | <b>Certainty of the evidence (GRADE)</b> |       |
|                                                 |                                                                                                                                        |                                                                                                                                                                                                                                                                                                  |                                                              |                            | ○○○○<br>MODERATE                         |       |
|                                                 |                                                                                                                                        |                                                                                                                                                                                                                                                                                                  |                                                              |                            | ○○○○<br>MODERATE                         |       |
|                                                 |                                                                                                                                        |                                                                                                                                                                                                                                                                                                  |                                                              |                            | ○○○○<br>MODERATE                         |       |
|                                                 |                                                                                                                                        |                                                                                                                                                                                                                                                                                                  |                                                              |                            | ○○○○<br>MODERATE                         |       |
|                                                 |                                                                                                                                        |                                                                                                                                                                                                                                                                                                  |                                                              |                            | ○○○○<br>MODERATE                         |       |
|                                                 |                                                                                                                                        |                                                                                                                                                                                                                                                                                                  |                                                              |                            | ○○○○<br>MODERATE                         |       |
|                                                 |                                                                                                                                        |                                                                                                                                                                                                                                                                                                  |                                                              |                            | ○○○○<br>MODERATE                         |       |
|                                                 |                                                                                                                                        |                                                                                                                                                                                                                                                                                                  |                                                              |                            | ○○○○<br>MODERATE                         |       |
| What is the overall certainty of this evidence? | <ul style="list-style-type: none"> <li>○ No studies</li> <li>○ Very low</li> <li>○ Low</li> <li>○ Moderate</li> <li>○ High</li> </ul>  |                                                                                                                                                                                                                                                                                                  |                                                              |                            |                                          |       |

|                                                                                                                                                                                                                                                    |                                                                                                                                                                                                                                                |                |                       |                |                                     |  |
|----------------------------------------------------------------------------------------------------------------------------------------------------------------------------------------------------------------------------------------------------|------------------------------------------------------------------------------------------------------------------------------------------------------------------------------------------------------------------------------------------------|----------------|-----------------------|----------------|-------------------------------------|--|
| <input type="checkbox"/> How substantial are the desirable anticipated effects of the intervention? Large <ul style="list-style-type: none"> <li>○ Moderate</li> <li>○ Small</li> <li>○ Trivial</li> <li>○ Varies</li> <li>○ Don't know</li> </ul> | <i>Summary of findings (GRADE):</i>                                                                                                                                                                                                            |                |                       |                |                                     |  |
|                                                                                                                                                                                                                                                    |                                                                                                                                                                                                                                                | <b>Outcome</b> | <b>Nº of patients</b> |                | <b>Effect</b>                       |  |
|                                                                                                                                                                                                                                                    |                                                                                                                                                                                                                                                |                | <b>Intervention</b>   | <b>Control</b> | <b>Relative / Absolute (95% CI)</b> |  |
| How substantial are the undesirable anticipated effects of the intervention?                                                                                                                                                                       | <ul style="list-style-type: none"> <li>○ Trivial</li> <li>○ Small</li> <li>○ Moderate</li> <li>○ Large</li> <li>○ Varies</li> <li>○ Don't know</li> </ul>                                                                                      |                |                       |                |                                     |  |
| Does the balance between desirable effects and undesirable effects favour the option of the comparison?                                                                                                                                            | <ul style="list-style-type: none"> <li>○ Favours the option</li> <li>○ Probably favours the option</li> <li>○ Does not favour either</li> <li>○ Probably favours the comparison</li> <li>○ Favours the comparison</li> <li>○ Varies</li> </ul> |                |                       |                |                                     |  |

|                                                                        |                                                                                                                                                                                |                                                                                                                                                                                                                                                |                                                                                                                                       |  |
|------------------------------------------------------------------------|--------------------------------------------------------------------------------------------------------------------------------------------------------------------------------|------------------------------------------------------------------------------------------------------------------------------------------------------------------------------------------------------------------------------------------------|---------------------------------------------------------------------------------------------------------------------------------------|--|
| <b>Values and preferences</b>                                          | Is there similarity about how much patients, researchers, clinicians and stake holders value the main Outcomes?<br>Also include adverse effects and burden of the intervention | <ul style="list-style-type: none"> <li>○ No</li> <li>○ Probably no</li> <li>○ Uncertain</li> <li>○ Probably yes</li> <li>○ Yes</li> <li>○ Varies</li> </ul>                                                                                    |                                                                                                                                       |  |
|                                                                        | <b>Resources</b>                                                                                                                                                               | What is the certainty of the evidence of resources requirements (costs)?                                                                                                                                                                       | <ul style="list-style-type: none"> <li>○ No studies</li> <li>○ Very low</li> <li>○ Low</li> <li>○ Moderate</li> <li>○ High</li> </ul> |  |
| Does the cost effectiveness favour the intervention or the comparison? |                                                                                                                                                                                | <ul style="list-style-type: none"> <li>○ Favours the option</li> <li>○ Probably favours the option</li> <li>○ Does not favour either</li> <li>○ Probably favours the comparison</li> <li>○ Favours the comparison</li> <li>○ Varies</li> </ul> |                                                                                                                                       |  |

|               |                                               |                                                                                                                                                                                   |  |  |
|---------------|-----------------------------------------------|-----------------------------------------------------------------------------------------------------------------------------------------------------------------------------------|--|--|
| Equity        | What would be the impact on health equity?    | <ul style="list-style-type: none"> <li>○ Increased</li> <li>○ Probably increased</li> <li>○ Uncertain</li> <li>○ Probably reduced</li> <li>○ Reduced</li> <li>○ Varies</li> </ul> |  |  |
| Acceptability | Is the option acceptable to key stakeholders? | <ul style="list-style-type: none"> <li>○ No</li> <li>○ Probably no</li> <li>○ Uncertain</li> <li>○ Probably yes</li> <li>○ Yes</li> <li>○ Varies</li> </ul>                       |  |  |



|                    |                                            |                                                                                                                                                                                                     |  |  |
|--------------------|--------------------------------------------|-----------------------------------------------------------------------------------------------------------------------------------------------------------------------------------------------------|--|--|
| <b>Feasibility</b> | Is the intervention feasible to implement? | <input type="radio"/> No<br><input type="radio"/> Probably no<br><input type="radio"/> Uncertain<br><input type="radio"/> Probably yes<br><input type="radio"/> Yes<br><input type="radio"/> Varies |  |  |
|--------------------|--------------------------------------------|-----------------------------------------------------------------------------------------------------------------------------------------------------------------------------------------------------|--|--|

**Should \_\_\_ be recommended for older adults to prevent and manage falls?**

| Type of recommendation        | Strong recommendation against the intervention<br><input type="radio"/> | Weak recommendation against the intervention<br><input type="radio"/> | Conditional recommendation for either the intervention or the comparison<br><input type="radio"/> | Weak recommendation for the intervention<br><input type="radio"/> | Strong recommendation for the intervention<br><input type="radio"/> |
|-------------------------------|-------------------------------------------------------------------------|-----------------------------------------------------------------------|---------------------------------------------------------------------------------------------------|-------------------------------------------------------------------|---------------------------------------------------------------------|
| Recommendation                |                                                                         |                                                                       |                                                                                                   |                                                                   |                                                                     |
| Justification                 |                                                                         |                                                                       |                                                                                                   |                                                                   |                                                                     |
| Subgroup considerations       |                                                                         |                                                                       |                                                                                                   |                                                                   |                                                                     |
| Implementation considerations |                                                                         |                                                                       |                                                                                                   |                                                                   |                                                                     |
| Monitoring and evaluation     |                                                                         |                                                                       |                                                                                                   |                                                                   |                                                                     |
| Research Priorities           |                                                                         |                                                                       |                                                                                                   |                                                                   |                                                                     |

## Recommendations for Working Group 5: Falls in Nursing Homes

**Recommendation 2 (Care homes management and interventions): We recommend against the use of physical restraints as a measure for falls prevention in care homes. GRADE: 1B**

| <b>Population:</b>      | Older adults $\geq 65$ years of age | <b>Objective:</b> <i>The objective was to review the literature to assess if physical restraints should be used as a measure for falls prevention in nursing home residents.</i>                                                                                                                      |                   |                                         |
|-------------------------|-------------------------------------|-------------------------------------------------------------------------------------------------------------------------------------------------------------------------------------------------------------------------------------------------------------------------------------------------------|-------------------|-----------------------------------------|
| <b>Intervention:</b>    | No longer using physical restraints |                                                                                                                                                                                                                                                                                                       |                   |                                         |
| <b>Comparison:</b>      | Using physical restraints           |                                                                                                                                                                                                                                                                                                       |                   |                                         |
| <b>Main outcomes:</b>   | Falls                               |                                                                                                                                                                                                                                                                                                       |                   |                                         |
| <b>Setting:</b>         | Nursing home                        |                                                                                                                                                                                                                                                                                                       |                   |                                         |
| <b>Perspective:</b>     | Nursing home population             |                                                                                                                                                                                                                                                                                                       |                   |                                         |
| Decision Domain         |                                     | Judgements                                                                                                                                                                                                                                                                                            | Research Evidence | Additional Considerations /Explanations |
| Priority of the Problem | Is the problem a priority?          | <ul style="list-style-type: none"> <li><input type="radio"/> No</li> <li><input type="radio"/> Probably no</li> <li><input type="radio"/> Uncertain</li> <li><input type="radio"/> Probably yes</li> <li><input checked="" type="radio"/> <b>Yes</b></li> <li><input type="radio"/> Varies</li> </ul> |                   |                                         |

|                                                 |                                                                                                                                              |                                                                                                                                                                                                                                                                                                         |                                                              |                            |                                          |       |
|-------------------------------------------------|----------------------------------------------------------------------------------------------------------------------------------------------|---------------------------------------------------------------------------------------------------------------------------------------------------------------------------------------------------------------------------------------------------------------------------------------------------------|--------------------------------------------------------------|----------------------------|------------------------------------------|-------|
| Benefits and harms<br>(see below)               | Is there important uncertainty or variability in how much patients, researchers, clinicians and stake holders value the main outcomes?       | <ul style="list-style-type: none"> <li>○ Important uncertainty or variability</li> <li>○ Possibly important uncertainty or variability</li> <li>● <b>Probably no important uncertainty of variability</b></li> <li>○ No important uncertainty of variability</li> <li>○ No known undesirable</li> </ul> | <i>Relative importance of the main outcomes of interest:</i> |                            |                                          | None. |
|                                                 |                                                                                                                                              |                                                                                                                                                                                                                                                                                                         | <b>Outcome</b>                                               | <b>Relative Importance</b> | <b>Certainty of the evidence (GRADE)</b> |       |
|                                                 |                                                                                                                                              |                                                                                                                                                                                                                                                                                                         | Fall risk                                                    | Critical                   | ⊕⊕⊕○<br>MODERATE                         |       |
|                                                 |                                                                                                                                              |                                                                                                                                                                                                                                                                                                         |                                                              |                            | ○○○○<br>MODERATE                         |       |
|                                                 |                                                                                                                                              |                                                                                                                                                                                                                                                                                                         |                                                              |                            | ○○○○<br>MODERATE                         |       |
|                                                 |                                                                                                                                              |                                                                                                                                                                                                                                                                                                         |                                                              |                            | ○○○○<br>MODERATE                         |       |
|                                                 |                                                                                                                                              |                                                                                                                                                                                                                                                                                                         |                                                              |                            | ○○○○<br>MODERATE                         |       |
|                                                 |                                                                                                                                              |                                                                                                                                                                                                                                                                                                         |                                                              |                            | ○○○○<br>MODERATE                         |       |
|                                                 |                                                                                                                                              |                                                                                                                                                                                                                                                                                                         |                                                              |                            | ○○○○<br>MODERATE                         |       |
|                                                 |                                                                                                                                              |                                                                                                                                                                                                                                                                                                         |                                                              |                            | ○○○○<br>MODERATE                         |       |
| What is the overall certainty of this evidence? | <ul style="list-style-type: none"> <li>○ No studies</li> <li>○ Very low</li> <li>○ Low</li> <li>● <b>Moderate</b></li> <li>○ High</li> </ul> |                                                                                                                                                                                                                                                                                                         |                                                              |                            |                                          |       |

|                                                                                                         |                                                                                                                                                                                                                                                       |                                              |                                  |                |                                                          |                                                                       |
|---------------------------------------------------------------------------------------------------------|-------------------------------------------------------------------------------------------------------------------------------------------------------------------------------------------------------------------------------------------------------|----------------------------------------------|----------------------------------|----------------|----------------------------------------------------------|-----------------------------------------------------------------------|
| How substantial are the desirable anticipated effects of the intervention?                              | <ul style="list-style-type: none"> <li>○ Large</li> <li>○ Moderate</li> <li>● <b>Small</b></li> <li>○ Trivial</li> <li>○ Varies</li> <li>○ Don't know</li> </ul>                                                                                      | <b>Summary of findings (GRADE): 1B</b>       |                                  |                | Use of physical restraints act as a proxy for falls risk |                                                                       |
| How substantial are the undesirable anticipated effects of the intervention?                            | <ul style="list-style-type: none"> <li>● <b>Trivial</b></li> <li>○ Small</li> <li>○ Moderate</li> <li>○ Large</li> <li>○ Varies</li> <li>○ Don't know</li> </ul>                                                                                      |                                              | <b>N<sup>o</sup> of patients</b> |                | <b>Effect</b>                                            | Multicomponent study on reducing physical restraint use vs usual care |
|                                                                                                         |                                                                                                                                                                                                                                                       | <b>Outcome</b>                               | <b>Intervention</b>              | <b>Control</b> | <b>Relative / Absolute (95% CI)</b>                      |                                                                       |
|                                                                                                         |                                                                                                                                                                                                                                                       | Physical restraint use (proxy of falls risk) | 8002                             | 8935           | RR = 0.83<br>(0.73 – 0.94)                               |                                                                       |
|                                                                                                         |                                                                                                                                                                                                                                                       | Physical restraint use (short term)          | 2209                             | 2006           | RR = 0.86<br>(0.73 – 1.02)                               |                                                                       |
| Does the balance between desirable effects and undesirable effects favour the option of the comparison? | <ul style="list-style-type: none"> <li>○ Favours the option</li> <li>● <b>Probably favours the option</b></li> <li>○ Does not favour either</li> <li>○ Probably favours the comparison</li> <li>○ Favours the comparison</li> <li>○ Varies</li> </ul> | Physical restraint use (medium term)         | 7733                             | 8510           | RR = 0.82<br>(0.69 – 0.98)                               |                                                                       |

|                                                                        |                                                                                                                                                                                |                                                                                                                                                                                                                                                                             |                                                                                                                                              |  |
|------------------------------------------------------------------------|--------------------------------------------------------------------------------------------------------------------------------------------------------------------------------|-----------------------------------------------------------------------------------------------------------------------------------------------------------------------------------------------------------------------------------------------------------------------------|----------------------------------------------------------------------------------------------------------------------------------------------|--|
| Values and preferences                                                 | Is there similarity about how much patients, researchers, clinicians and stake holders value the main Outcomes?<br>Also include adverse effects and burden of the intervention | <ul style="list-style-type: none"> <li>○ No</li> <li>○ Probably no</li> <li>○ Uncertain</li> <li>● <b>Probably yes</b></li> <li>○ Yes</li> <li>○ Varies</li> </ul>                                                                                                          |                                                                                                                                              |  |
|                                                                        | Resources                                                                                                                                                                      | What is the certainty of the evidence of resources requirements (costs)?                                                                                                                                                                                                    | <ul style="list-style-type: none"> <li>● <b>No studies</b></li> <li>○ Very low</li> <li>○ Low</li> <li>○ Moderate</li> <li>○ High</li> </ul> |  |
| Does the cost effectiveness favour the intervention or the comparison? |                                                                                                                                                                                | <ul style="list-style-type: none"> <li>● <b>No studies</b></li> <li>○ Favours the option</li> <li>○ Probably favours the option</li> <li>○ Does not favour either</li> <li>○ Probably favours the comparison</li> <li>○ Favours the comparison</li> <li>○ Varies</li> </ul> |                                                                                                                                              |  |

|               |                                               |                                                                                                                                                                                                                                                                                                                             |  |  |
|---------------|-----------------------------------------------|-----------------------------------------------------------------------------------------------------------------------------------------------------------------------------------------------------------------------------------------------------------------------------------------------------------------------------|--|--|
| Equity        | What would be the impact on health equity?    | <ul style="list-style-type: none"> <li><input type="radio"/> Increased</li> <li><input type="radio"/> Probably increased</li> <li><input checked="" type="radio"/> <b>Uncertain</b></li> <li><input type="radio"/> Probably reduced</li> <li><input type="radio"/> Reduced</li> <li><input type="radio"/> Varies</li> </ul> |  |  |
| Acceptability | Is the option acceptable to key stakeholders? | <ul style="list-style-type: none"> <li><input type="radio"/> No</li> <li><input type="radio"/> Probably no</li> <li><input type="radio"/> Uncertain</li> <li><input checked="" type="radio"/> <b>Probably yes</b></li> <li><input type="radio"/> Yes</li> <li><input type="radio"/> Varies</li> </ul>                       |  |  |

|             |                                            |                                                                                                                                                                                                                       |  |  |
|-------------|--------------------------------------------|-----------------------------------------------------------------------------------------------------------------------------------------------------------------------------------------------------------------------|--|--|
| Feasibility | Is the intervention feasible to implement? | <input type="radio"/> No<br><input type="radio"/> Probably no<br><input type="radio"/> Uncertain<br><input checked="" type="radio"/> <b>Probably yes</b><br><input type="radio"/> Yes<br><input type="radio"/> Varies |  |  |
|-------------|--------------------------------------------|-----------------------------------------------------------------------------------------------------------------------------------------------------------------------------------------------------------------------|--|--|

**Should \_\_\_ be recommended for older adults to prevent and manage falls?**

| Type of recommendation        | Strong recommendation against the intervention<br><input type="radio"/>                                                                                                                                                                                                                                                                                                                                                                                                                                                                                                                                              | Weak recommendation against the intervention<br><input type="radio"/> | Conditional recommendation for either the intervention or the comparison<br><input type="radio"/> | Weak recommendation for the intervention<br><input type="radio"/> | Strong recommendation for the intervention<br><input checked="" type="radio"/> |
|-------------------------------|----------------------------------------------------------------------------------------------------------------------------------------------------------------------------------------------------------------------------------------------------------------------------------------------------------------------------------------------------------------------------------------------------------------------------------------------------------------------------------------------------------------------------------------------------------------------------------------------------------------------|-----------------------------------------------------------------------|---------------------------------------------------------------------------------------------------|-------------------------------------------------------------------|--------------------------------------------------------------------------------|
| Recommendation                | Recommendation 2: We recommend against the use of physical restraints as a measure for falls prevention in care homes. GRADE: 1B                                                                                                                                                                                                                                                                                                                                                                                                                                                                                     |                                                                       |                                                                                                   |                                                                   |                                                                                |
| Justification                 | Based on the evidence, the working group considered this an important issue and recommends against the use of physical restraints as a measure for falls prevention in nursing homes.                                                                                                                                                                                                                                                                                                                                                                                                                                |                                                                       |                                                                                                   |                                                                   |                                                                                |
| Subgroup considerations       | Not applicable                                                                                                                                                                                                                                                                                                                                                                                                                                                                                                                                                                                                       |                                                                       |                                                                                                   |                                                                   |                                                                                |
| Implementation considerations | <ul style="list-style-type: none"> <li>Alternative approaches to restraints: Registered Nurses' Association of Ontario. (2012). Promoting safety: Alternative approaches to the use of restraints. Toronto, ON: Author. RAO. ca/bpg/guidelines/promoting-safety-alternative-approaches-use-restraints (RAO, 2017)</li> <li>Evidence Booster: Becoming restraint-free— The impact on falls rate. <a href="https://rno.ca/bpg/resources/evidence-booster-becoming-restraint-free-impact-falls-rate">https://rno.ca/bpg/resources/evidence-booster-becoming-restraint-free-impact-falls-rate</a> (RAO, 2017)</li> </ul> |                                                                       |                                                                                                   |                                                                   |                                                                                |
| Monitoring and evaluation     | Not applicable, but the nursing home practice should be monitored on a regular basis to ensure that physical restraints are NOT used as a measure for falls prevention.                                                                                                                                                                                                                                                                                                                                                                                                                                              |                                                                       |                                                                                                   |                                                                   |                                                                                |
| Research Priorities           | Considering the findings of Brugnolli et al. (2020), additional studies implementing and evaluating educational programs alone or with consultation/guidance might offer additional evidence of the effectiveness of these programs on reducing physical restraints use in nursing homes.                                                                                                                                                                                                                                                                                                                            |                                                                       |                                                                                                   |                                                                   |                                                                                |

## Recommendations for Working Group 5: Nursing Homes

**Recommendation 3 (Care Homes Management and Interventions): We recommend nutritional optimisation including food rich in calcium and proteins, as well as vitamin D supplementation as part of a multidomain intervention for falls prevention in care home residents. GRADE: 1B**

|                         |                                                      |                                                                                                                                                                                                |                   |                                          |
|-------------------------|------------------------------------------------------|------------------------------------------------------------------------------------------------------------------------------------------------------------------------------------------------|-------------------|------------------------------------------|
| <i>Population:</i>      | Older adults $\geq 65$ years of age in nursing homes | <i>Objective: The objective was to review the literature to assess if vitamin D supplementation should be given as part of a multidomain intervention for falls in nursing home residents.</i> |                   |                                          |
| <i>Intervention:</i>    | Vitamin D supplementation                            |                                                                                                                                                                                                |                   |                                          |
| <i>Comparison:</i>      | No vitamin d                                         |                                                                                                                                                                                                |                   |                                          |
| <i>Main outcomes:</i>   | Falls                                                |                                                                                                                                                                                                |                   |                                          |
| <i>Setting:</i>         | Nursing homes                                        |                                                                                                                                                                                                |                   |                                          |
| <i>Perspective:</i>     | Nursing home population                              |                                                                                                                                                                                                |                   |                                          |
| Decision Domain         |                                                      | Judgements                                                                                                                                                                                     | Research Evidence | Additional Considerations / Explanations |
| Priority of the Problem | Is the problem a priority?                           | <ul style="list-style-type: none"> <li>○ No</li> <li>○ Probably no</li> <li>○ Uncertain</li> <li>○ Probably yes</li> <li>● Yes</li> <li>○ Varies</li> </ul>                                    |                   |                                          |



|                                                 |                                                                                                                                        |                                                                                                                                                                                                                                                                                                  |                                                              |                     |                                   |       |
|-------------------------------------------------|----------------------------------------------------------------------------------------------------------------------------------------|--------------------------------------------------------------------------------------------------------------------------------------------------------------------------------------------------------------------------------------------------------------------------------------------------|--------------------------------------------------------------|---------------------|-----------------------------------|-------|
| Benefits and harms<br>(see below)               | Is there important uncertainty or variability in how much patients, researchers, clinicians and stake holders value the main outcomes? | <ul style="list-style-type: none"> <li>○ Important uncertainty or variability</li> <li>○ Possibly important uncertainty or variability</li> <li>● Probably no important uncertainty of variability</li> <li>○ No important uncertainty of variability</li> <li>○ No known undesirable</li> </ul> | <i>Relative importance of the main outcomes of interest:</i> |                     |                                   | None. |
|                                                 |                                                                                                                                        |                                                                                                                                                                                                                                                                                                  | Outcome                                                      | Relative Importance | Certainty of the evidence (GRADE) |       |
|                                                 |                                                                                                                                        |                                                                                                                                                                                                                                                                                                  | Rate of falls                                                | Critical            | ⊕⊕⊕○<br>MODERATE                  |       |
|                                                 |                                                                                                                                        |                                                                                                                                                                                                                                                                                                  | Risk of falls                                                | Critical            | ⊕⊕⊕○<br>MODERATE                  |       |
|                                                 |                                                                                                                                        |                                                                                                                                                                                                                                                                                                  |                                                              |                     | ○○○○<br>MODERATE                  |       |
|                                                 |                                                                                                                                        |                                                                                                                                                                                                                                                                                                  |                                                              |                     | ○○○○<br>MODERATE                  |       |
|                                                 |                                                                                                                                        |                                                                                                                                                                                                                                                                                                  |                                                              |                     | ○○○○<br>MODERATE                  |       |
|                                                 |                                                                                                                                        |                                                                                                                                                                                                                                                                                                  |                                                              |                     | ○○○○<br>MODERATE                  |       |
|                                                 |                                                                                                                                        |                                                                                                                                                                                                                                                                                                  |                                                              |                     | ○○○○<br>MODERATE                  |       |
|                                                 |                                                                                                                                        |                                                                                                                                                                                                                                                                                                  |                                                              |                     | ○○○○<br>MODERATE                  |       |
| What is the overall certainty of this evidence? | <ul style="list-style-type: none"> <li>○ No studies</li> <li>○ Very low</li> <li>○ Low</li> <li>● Moderate</li> <li>○ High</li> </ul>  |                                                                                                                                                                                                                                                                                                  |                                                              |                     |                                   |       |

|                                                                                                         |                                                                                                                                                                                                                                                |                                        |               |         |                                                 |                                                  |
|---------------------------------------------------------------------------------------------------------|------------------------------------------------------------------------------------------------------------------------------------------------------------------------------------------------------------------------------------------------|----------------------------------------|---------------|---------|-------------------------------------------------|--------------------------------------------------|
| How substantial are the desirable anticipated effects of the intervention?                              | <ul style="list-style-type: none"> <li>○ Large</li> <li>● Moderate</li> <li>○ Small</li> <li>○ Trivial</li> <li>○ Varies</li> <li>○ Don't know</li> </ul>                                                                                      | <i>Summary of findings (GRADE): 1B</i> |               |         |                                                 |                                                  |
|                                                                                                         |                                                                                                                                                                                                                                                |                                        | № of patients |         |                                                 | Effect                                           |
|                                                                                                         |                                                                                                                                                                                                                                                | Outcome                                | Intervention  | Control |                                                 | Relative / Absolute (95% CI)                     |
|                                                                                                         |                                                                                                                                                                                                                                                | Rate of falls (Cameron et al. 2018)    |               |         |                                                 | RaR = 0.72 (0.55 – 0.95)<br>I <sup>2</sup> = 62% |
| How substantial are the undesirable anticipated effects of the intervention?                            | <ul style="list-style-type: none"> <li>● Trivial</li> <li>○ Small</li> <li>○ Moderate</li> <li>○ Large</li> <li>○ Varies</li> <li>○ Don't know</li> </ul>                                                                                      | Risk of falling (Cameron et al. 2018)  |               |         | RR = 0.92 (0.76 – 1.12)<br>I <sup>2</sup> = 42% |                                                  |
|                                                                                                         |                                                                                                                                                                                                                                                |                                        |               |         |                                                 |                                                  |
| Does the balance between desirable effects and undesirable effects favour the option of the comparison? | <ul style="list-style-type: none"> <li>○ Favours the option</li> <li>● Probably favours the option</li> <li>○ Does not favour either</li> <li>○ Probably favours the comparison</li> <li>○ Favours the comparison</li> <li>○ Varies</li> </ul> |                                        |               |         |                                                 |                                                  |

|                        |                                                                                                                                                                                |                                                                                                                                                                                                                                                                                                                                                                                                                             |  |  |
|------------------------|--------------------------------------------------------------------------------------------------------------------------------------------------------------------------------|-----------------------------------------------------------------------------------------------------------------------------------------------------------------------------------------------------------------------------------------------------------------------------------------------------------------------------------------------------------------------------------------------------------------------------|--|--|
| Values and preferences | Is there similarity about how much patients, researchers, clinicians and stake holders value the main Outcomes?<br>Also include adverse effects and burden of the intervention | <ul style="list-style-type: none"> <li><input type="radio"/> No</li> <li><input type="radio"/> Probably no</li> <li><input type="radio"/> Uncertain</li> <li><input checked="" type="radio"/> Probably yes</li> <li><input type="radio"/> Yes</li> <li><input type="radio"/> Varies</li> </ul>                                                                                                                              |  |  |
| Resources              | What is the certainty of the evidence of resources requirements (costs)?                                                                                                       | <ul style="list-style-type: none"> <li><input type="radio"/> No studies</li> <li><input type="radio"/> Very low</li> <li><input checked="" type="radio"/> Low</li> <li><input type="radio"/> Moderate</li> <li><input type="radio"/> High</li> </ul>                                                                                                                                                                        |  |  |
|                        | Does the cost effectiveness favour the intervention or the comparison?                                                                                                         | <ul style="list-style-type: none"> <li><input type="radio"/> No studies</li> <li><input type="radio"/> Favours the option</li> <li><input checked="" type="radio"/> Probably favours the option</li> <li><input type="radio"/> Does not favour either</li> <li><input type="radio"/> Probably favours the comparison</li> <li><input type="radio"/> Favours the comparison</li> <li><input type="radio"/> Varies</li> </ul> |  |  |

|               |                                               |                                                                                                                                                                                                                                                                                                                      |  |  |
|---------------|-----------------------------------------------|----------------------------------------------------------------------------------------------------------------------------------------------------------------------------------------------------------------------------------------------------------------------------------------------------------------------|--|--|
| Equity        | What would be the impact on health equity?    | <ul style="list-style-type: none"> <li><input type="radio"/> Increased</li> <li><input type="radio"/> Probably increased</li> <li><input checked="" type="radio"/> Uncertain</li> <li><input type="radio"/> Probably reduced</li> <li><input type="radio"/> Reduced</li> <li><input type="radio"/> Varies</li> </ul> |  |  |
| Acceptability | Is the option acceptable to key stakeholders? | <ul style="list-style-type: none"> <li><input type="radio"/> No</li> <li><input type="radio"/> Probably no</li> <li><input type="radio"/> Uncertain</li> <li><input checked="" type="radio"/> Probably yes</li> <li><input type="radio"/> Yes</li> <li><input type="radio"/> Varies</li> </ul>                       |  |  |

|             |                                            |                                                                                                                                                             |  |  |
|-------------|--------------------------------------------|-------------------------------------------------------------------------------------------------------------------------------------------------------------|--|--|
| Feasibility | Is the intervention feasible to implement? | <ul style="list-style-type: none"> <li>○ No</li> <li>○ Probably no</li> <li>○ Uncertain</li> <li>○ Probably yes</li> <li>● Yes</li> <li>○ Varies</li> </ul> |  |  |
|-------------|--------------------------------------------|-------------------------------------------------------------------------------------------------------------------------------------------------------------|--|--|

**Should vitamin D supplementation as part of a multidomain intervention for falls prevention in nursing home residents be recommended for older adults to prevent and manage falls?**

| Type of recommendation        | Strong recommendation against the intervention<br>○                                                                                                                                                                                                                                                                                                                                                                                                                                                                                                                                                                              | Weak recommendation against the intervention<br>○ | Conditional recommendation for either the intervention or the comparison<br>○ | Weak recommendation for the intervention<br>● | Strong recommendation for the intervention<br>○ |
|-------------------------------|----------------------------------------------------------------------------------------------------------------------------------------------------------------------------------------------------------------------------------------------------------------------------------------------------------------------------------------------------------------------------------------------------------------------------------------------------------------------------------------------------------------------------------------------------------------------------------------------------------------------------------|---------------------------------------------------|-------------------------------------------------------------------------------|-----------------------------------------------|-------------------------------------------------|
| Recommendation                | Recommendation 3: We recommend nutritional optimisation including food rich in calcium and proteins, as well as vitamin D supplementation as part of a multidomain intervention for falls prevention in care home residents. GRADE: 1B                                                                                                                                                                                                                                                                                                                                                                                           |                                                   |                                                                               |                                               |                                                 |
| Justification                 | Although there is moderate evidence that vitamin D supplementation can reduce falls in aged care residents, there is a lack of firm evidence for its role as part of a holistic multifactorial fall's prevention intervention is warranted in older nursing home residents. Although there is moderate evidence that vitamin D supplementation can reduce falls in aged care residents, there is a lack of firm evidence for its role as part of a holistic multifactorial fall's prevention intervention                                                                                                                        |                                                   |                                                                               |                                               |                                                 |
| Subgroup considerations       | Not applicable.                                                                                                                                                                                                                                                                                                                                                                                                                                                                                                                                                                                                                  |                                                   |                                                                               |                                               |                                                 |
| Implementation considerations | Implementing vitamin D supplementation as part of a multidomain intervention for falls in nursing home residents is complex in the nursing home setting despite the relatively low cost. Walker et al. (2020) aimed to increase vitamin D supplement use uptake in Australian residential aged care facilities by evaluating a range of strategies to support implementation. They concluded that some strategies appeared to be associated with better outcomes, but the overall impact was limited and recommended that the role of organizational and governmental support for implementation should be investigated further. |                                                   |                                                                               |                                               |                                                 |
| Monitoring and evaluation     | We recommend performing a multifactorial falls risk assessment at admission to identify factors contributing to fall risk and determine appropriate interventions and follow-up measures to avoid falls and fall-related injuries. This assessment should be repeated at least once annually or when the residents' condition changes and based on resource availability in each setting and should include vitamin D supplementation.                                                                                                                                                                                           |                                                   |                                                                               |                                               |                                                 |
| Research Priorities           | Increasing the implementation and uptake of vitamin D supplements should be a research priority. (Walker et al. 2020). More studies are needed to investigate the effect of vitamin D supplementation on falls in older nursing home residents                                                                                                                                                                                                                                                                                                                                                                                   |                                                   |                                                                               |                                               |                                                 |

## Recommendations for Working Group 5: Falls in Nursing Homes

**Recommendation 4 (Care Homes Management and Interventions): We recommend including the promotion of exercise training (when feasible and safe) as part of a multidomain falls prevention intervention in care homes. GRADE: 1C**

| <b>Population:</b>             | Older adults $\geq 65$ years of age | <b>Objective:</b> <i>The objective was to review the literature to assess if physical activity should be given as part of a multidomain intervention for falls in nursing home residents.</i>                                                                                                         |                   |                                         |
|--------------------------------|-------------------------------------|-------------------------------------------------------------------------------------------------------------------------------------------------------------------------------------------------------------------------------------------------------------------------------------------------------|-------------------|-----------------------------------------|
| <b>Intervention:</b>           | Physical exercise                   |                                                                                                                                                                                                                                                                                                       |                   |                                         |
| <b>Comparison:</b>             | No exercise                         |                                                                                                                                                                                                                                                                                                       |                   |                                         |
| <b>Main outcomes:</b>          | Falls                               |                                                                                                                                                                                                                                                                                                       |                   |                                         |
| <b>Setting:</b>                | Nursing home                        |                                                                                                                                                                                                                                                                                                       |                   |                                         |
| <b>Perspective:</b>            | Nursing home population             |                                                                                                                                                                                                                                                                                                       |                   |                                         |
| Decision Domain                |                                     | Judgements                                                                                                                                                                                                                                                                                            | Research Evidence | Additional Considerations /Explanations |
| <b>Priority of the Problem</b> | Is the problem a priority?          | <ul style="list-style-type: none"> <li><input type="radio"/> No</li> <li><input type="radio"/> Probably no</li> <li><input type="radio"/> Uncertain</li> <li><input type="radio"/> Probably yes</li> <li><input checked="" type="radio"/> <b>Yes</b></li> <li><input type="radio"/> Varies</li> </ul> |                   |                                         |

|                                                 |                                                                                                                                        |                                                                                                                                                                                                                                                                                                         |                                                              |                            |                                          |       |
|-------------------------------------------------|----------------------------------------------------------------------------------------------------------------------------------------|---------------------------------------------------------------------------------------------------------------------------------------------------------------------------------------------------------------------------------------------------------------------------------------------------------|--------------------------------------------------------------|----------------------------|------------------------------------------|-------|
| Benefits and harms<br>(see below)               | Is there important uncertainty or variability in how much patients, researchers, clinicians and stake holders value the main outcomes? | <ul style="list-style-type: none"> <li>○ Important uncertainty or variability</li> <li>○ Possibly important uncertainty or variability</li> <li>● <b>Probably no important uncertainty of variability</b></li> <li>○ No important uncertainty of variability</li> <li>○ No known undesirable</li> </ul> | <i>Relative importance of the main outcomes of interest:</i> |                            |                                          | None. |
|                                                 |                                                                                                                                        |                                                                                                                                                                                                                                                                                                         | <b>Outcome</b>                                               | <b>Relative Importance</b> | <b>Certainty of the evidence (GRADE)</b> |       |
|                                                 |                                                                                                                                        |                                                                                                                                                                                                                                                                                                         | Fall prevention                                              | Critical                   | N/A                                      |       |
|                                                 |                                                                                                                                        |                                                                                                                                                                                                                                                                                                         |                                                              |                            | ○○○○<br>MODERATE                         |       |
|                                                 |                                                                                                                                        |                                                                                                                                                                                                                                                                                                         |                                                              |                            | ○○○○<br>MODERATE                         |       |
|                                                 |                                                                                                                                        |                                                                                                                                                                                                                                                                                                         |                                                              |                            | ○○○○<br>MODERATE                         |       |
|                                                 |                                                                                                                                        |                                                                                                                                                                                                                                                                                                         |                                                              |                            | ○○○○<br>MODERATE                         |       |
|                                                 |                                                                                                                                        |                                                                                                                                                                                                                                                                                                         |                                                              |                            | ○○○○<br>MODERATE                         |       |
|                                                 |                                                                                                                                        |                                                                                                                                                                                                                                                                                                         |                                                              |                            | ○○○○<br>MODERATE                         |       |
|                                                 |                                                                                                                                        |                                                                                                                                                                                                                                                                                                         |                                                              |                            | ○○○○<br>MODERATE                         |       |
| What is the overall certainty of this evidence? | <ul style="list-style-type: none"> <li>● No studies</li> <li>○ Very low</li> <li>○ Low</li> <li>○ Moderate</li> <li>○ High</li> </ul>  |                                                                                                                                                                                                                                                                                                         |                                                              |                            |                                          |       |

|                                                                                                         |                                                                                                                                                                                                                                                       |                                                                              |                                                                                                                                                                  |                |                                                                 |                                     |
|---------------------------------------------------------------------------------------------------------|-------------------------------------------------------------------------------------------------------------------------------------------------------------------------------------------------------------------------------------------------------|------------------------------------------------------------------------------|------------------------------------------------------------------------------------------------------------------------------------------------------------------|----------------|-----------------------------------------------------------------|-------------------------------------|
| How substantial are the desirable anticipated effects of the intervention?                              | <ul style="list-style-type: none"> <li>○ Large</li> <li>○ Moderate</li> <li>○ Small</li> <li>○ Trivial</li> <li>○ Varies</li> <li>● <b>Don't know</b></li> </ul>                                                                                      | <b>Summary of findings (GRADE):</b>                                          |                                                                                                                                                                  |                | Provided references do not cover the topic of falls prevention. |                                     |
|                                                                                                         |                                                                                                                                                                                                                                                       | <b>Outcome</b>                                                               | <b>N<sup>o</sup> of patients</b>                                                                                                                                 |                |                                                                 | <b>Effect</b>                       |
|                                                                                                         |                                                                                                                                                                                                                                                       |                                                                              | <b>Intervention</b>                                                                                                                                              | <b>Control</b> |                                                                 | <b>Relative / Absolute (95% CI)</b> |
|                                                                                                         |                                                                                                                                                                                                                                                       | How substantial are the undesirable anticipated effects of the intervention? | <ul style="list-style-type: none"> <li>○ Trivial</li> <li>○ Small</li> <li>○ Moderate</li> <li>○ Large</li> <li>○ Varies</li> <li>● <b>Don't know</b></li> </ul> |                |                                                                 |                                     |
|                                                                                                         |                                                                                                                                                                                                                                                       |                                                                              |                                                                                                                                                                  |                |                                                                 |                                     |
| Does the balance between desirable effects and undesirable effects favour the option of the comparison? | <ul style="list-style-type: none"> <li>○ Favours the option</li> <li>○ Probably favours the option</li> <li>● <b>Does not favour either</b></li> <li>○ Probably favours the comparison</li> <li>○ Favours the comparison</li> <li>○ Varies</li> </ul> |                                                                              |                                                                                                                                                                  |                |                                                                 |                                     |



|                                                                        |                                                                                                                                                                             |                                                                                                                                                                                                                                                                             |                                                                                                                                              |  |
|------------------------------------------------------------------------|-----------------------------------------------------------------------------------------------------------------------------------------------------------------------------|-----------------------------------------------------------------------------------------------------------------------------------------------------------------------------------------------------------------------------------------------------------------------------|----------------------------------------------------------------------------------------------------------------------------------------------|--|
| Values and preferences                                                 | Is there similarity about how much patients, researchers, clinicians and stake holders value the main Outcomes? Also include adverse effects and burden of the intervention | <ul style="list-style-type: none"> <li>○ No</li> <li>○ Probably no</li> <li>● <b>Uncertain</b></li> <li>○ Probably yes</li> <li>○ Yes</li> <li>○ Varies</li> </ul>                                                                                                          |                                                                                                                                              |  |
|                                                                        | Resources                                                                                                                                                                   | What is the certainty of the evidence of resources requirements (costs)?                                                                                                                                                                                                    | <ul style="list-style-type: none"> <li>● <b>No studies</b></li> <li>○ Very low</li> <li>○ Low</li> <li>○ Moderate</li> <li>○ High</li> </ul> |  |
| Does the cost effectiveness favour the intervention or the comparison? |                                                                                                                                                                             | <ul style="list-style-type: none"> <li>● <b>No studies</b></li> <li>○ Favours the option</li> <li>○ Probably favours the option</li> <li>○ Does not favour either</li> <li>○ Probably favours the comparison</li> <li>○ Favours the comparison</li> <li>○ Varies</li> </ul> |                                                                                                                                              |  |

|               |                                               |                                                                                                                                                                                                                                                                                                                             |  |  |
|---------------|-----------------------------------------------|-----------------------------------------------------------------------------------------------------------------------------------------------------------------------------------------------------------------------------------------------------------------------------------------------------------------------------|--|--|
| Equity        | What would be the impact on health equity?    | <ul style="list-style-type: none"> <li><input type="radio"/> Increased</li> <li><input type="radio"/> Probably increased</li> <li><input checked="" type="radio"/> <b>Uncertain</b></li> <li><input type="radio"/> Probably reduced</li> <li><input type="radio"/> Reduced</li> <li><input type="radio"/> Varies</li> </ul> |  |  |
| Acceptability | Is the option acceptable to key stakeholders? | <ul style="list-style-type: none"> <li><input type="radio"/> No</li> <li><input type="radio"/> Probably no</li> <li><input checked="" type="radio"/> <b>Uncertain</b></li> <li><input type="radio"/> Probably yes</li> <li><input type="radio"/> Yes</li> <li><input type="radio"/> Varies</li> </ul>                       |  |  |

|             |                                            |                                                                                                                                                                    |  |  |
|-------------|--------------------------------------------|--------------------------------------------------------------------------------------------------------------------------------------------------------------------|--|--|
| Feasibility | Is the intervention feasible to implement? | <ul style="list-style-type: none"> <li>○ No</li> <li>○ Probably no</li> <li>● <b>Uncertain</b></li> <li>○ Probably yes</li> <li>○ Yes</li> <li>○ Varies</li> </ul> |  |  |
|-------------|--------------------------------------------|--------------------------------------------------------------------------------------------------------------------------------------------------------------------|--|--|

**Should \_\_\_ be recommended for older adults to prevent and manage falls?**

| Type of recommendation        | Strong recommendation against the intervention<br>○                                                                                                                                                                                                                                                                                                                                                                                                                                                                                                                                                                                                                         | Weak recommendation against the intervention<br>○ | Conditional recommendation for either the intervention or the comparison<br>○ | Weak recommendation for the intervention<br>○ | Strong recommendation for the intervention<br>● |
|-------------------------------|-----------------------------------------------------------------------------------------------------------------------------------------------------------------------------------------------------------------------------------------------------------------------------------------------------------------------------------------------------------------------------------------------------------------------------------------------------------------------------------------------------------------------------------------------------------------------------------------------------------------------------------------------------------------------------|---------------------------------------------------|-------------------------------------------------------------------------------|-----------------------------------------------|-------------------------------------------------|
| Recommendation                | Recommendation 4: We recommend including the promotion of exercise training (when feasible and safe) as part of a multidomain falls prevention intervention in care homes. GRADE: 1C                                                                                                                                                                                                                                                                                                                                                                                                                                                                                        |                                                   |                                                                               |                                               |                                                 |
| Justification                 | Although there is little evidence for this recommendation, the working group considered this an important recommendation based on expert consensus.                                                                                                                                                                                                                                                                                                                                                                                                                                                                                                                         |                                                   |                                                                               |                                               |                                                 |
| Subgroup considerations       | There are specific moderate exercise programs that could be implemented and tailored to residents living with dementia, which have demonstrated high level of adherence, and could slow the progressive deterioration in ability to perform AD's in this population.                                                                                                                                                                                                                                                                                                                                                                                                        |                                                   |                                                                               |                                               |                                                 |
| Implementation considerations | <ul style="list-style-type: none"> <li>● “Evidence Booster: Best Practice Guideline Implementation and Estimated Cost Savings”, RNAO, <a href="https://mao.ca/bpg/resources/evidence-booster-best-practice-guideline-implementation-and-estimated-cost-savings">https://mao.ca/bpg/resources/evidence-booster-best-practice-guideline-implementation-and-estimated-cost-savings</a></li> <li>● “Guidelines on Physical Activity and Sedentary Behavior” WHO, Chapter “Adoption, dissemination, implementation and evaluation, <a href="https://www.who.int/publications/i/item/9789240015128">https://www.who.int/publications/i/item/9789240015128</a>, p 70-75</li> </ul> |                                                   |                                                                               |                                               |                                                 |
| Monitoring and evaluation     | Falls and injury rate, amount and type of physical activity participation as well as health conditions, disease severity and dementia sub-types if applicable, should be monitored through national surveys and audits.                                                                                                                                                                                                                                                                                                                                                                                                                                                     |                                                   |                                                                               |                                               |                                                 |
| Research Priorities           | Studies evaluating the effectiveness and feasibility of physical activity (on fall-related outcomes) in nursing homes are needed to develop informed guidelines and recommendations for addressing sedentary behavior.                                                                                                                                                                                                                                                                                                                                                                                                                                                      |                                                   |                                                                               |                                               |                                                 |

## References

1. Haines TP, Hill K, Walsh W, Osborne R. Design-related bias in hospital fall risk screening tool predictive accuracy evaluations: systematic review and meta-analysis. *J Gerontol A Biol Sci Med Sci*. 2007 Jun;62(6):664-72.
2. NICE (National Institute for Health and Care Excellence). Falls in older people. National Institute for Health and Care Excellence; 2015. p. 10-4.
3. Morris ME, Haines T, Hill AM, Cameron ID, Jones C, Jazayeri D, et al. Divesting from a Scored Hospital Fall Risk Assessment Tool (FRAT): A Cluster Randomized Non-Inferiority Trial. *J Am Geriatr Soc*. 2021 Sep;69(9):2598-604.
4. Jellett J, Williams C, Clayton D, Plummer V, Haines T. Falls risk score removal does not impact inpatient falls: A stepped-wedge, cluster-randomised trial. *J Clin Nurs*. 2020 Dec;29(23-24):4505-13.
5. Billington J, Fahey T, Galvin R. Diagnostic accuracy of the STRATIFY clinical prediction rule for falls: a systematic review and meta-analysis. *BMC Fam Pract*. 2012 Aug 7;13:76.
6. Cameron ID, Dyer SM, Panagoda CE, Murray GR, Hill KD, Cumming RG, et al. Interventions for preventing falls in older people in care facilities and hospitals. *Cochrane Database Syst Rev*. 2018 Sep 7;9:CD005465.
7. Morris ME, Webster K, Jones C, Hill AM, Haines T, McPhail S, et al. Interventions to reduce falls in hospitals: a systematic review and meta-analysis. *Age Ageing*. 2022 May 1;51(5).
8. Heng H, Jazayeri D, Shaw L, Kiegaldie D, Hill AM, Morris ME. Hospital falls prevention with patient education: a scoping review. *BMC Geriatr*. 2020 Apr 15;20(1):140.
9. Hill AM, McPhail SM, Waldron N, Etherton-Beer C, Ingram K, Flicker L, et al. Fall rates in hospital rehabilitation units after individualised patient and staff education programmes: a pragmatic, stepped-wedge, cluster-randomised controlled trial. *Lancet*. 2015 Jun 27;385(9987):2592-9.
10. Haines TP, Hill AM, Hill KD, McPhail S, Oliver D, Brauer S, et al. Patient education to prevent falls among older hospital inpatients: a randomized controlled trial. *Arch Intern Med*. 2011 Mar 28;171(6):516-24.
11. Stern C, Jayasekara R. Interventions to reduce the incidence of falls in older adult patients in acute-care hospitals: a systematic review. *Int J Evid Based Healthc*. 2009 Dec;7(4):243-9.
12. Hshieh TT, Yue J, Oh E, Puelle M, Dowal S, Trivison T, et al. Effectiveness of multicomponent nonpharmacological delirium interventions: a meta-analysis. *JAMA Intern Med*. 2015 Apr;175(4):512-20.
13. Sahota O, Drummond A, Kendrick D, Grainge MJ, Vass C, Sach T, et al. REFINE (REducing Falls in In-patienT Elderly) using bed and bedside chair pressure sensors linked to radio-pagers in acute hospital care: a randomised controlled trial. *Age Ageing*. 2014 Mar;43(2):247-53.
14. Jazayeri D, Heng H, Slade SC, Seymour B, Lui R, Volpe D, et al. Benefits and risks of non-slip socks in hospitals: a rapid review. *Int J Qual Health Care*. 2021 Apr 9;33(2).
15. Sze TW, Leng CY, Lin SK. The effectiveness of physical restraints in reducing falls among adults in acute care hospitals and nursing homes: a systematic review. *JB Libr Syst Rev*. 2012;10(5):307-51.
16. Close JC, Lord SR. Fall assessment in older people. *BMJ*. 2011 Sep 14;343:d5153.
17. Nunan S, Brown Wilson C, Henwood T, Parker D. Fall risk assessment tools for use among older adults in long-term care settings: A systematic review of the literature. *Australas J Ageing*. 2018 Mar;37(1):23-33.
18. da Costa BR, Rutjes AW, Mendy A, Freund-Heritage R, Vieira ER. Can falls risk prediction tools correctly identify fall-prone elderly rehabilitation inpatients? A systematic review and meta-analysis. *PLoS One*. 2012;7(7):e41061.
19. Lee J, Geller AI, Strasser DC. Analytical review: focus on fall screening assessments. *PM R*. 2013 Jul;5(7):609-21.
20. Perell KL, Nelson A, Goldman RL, Luther SL, Prieto-Lewis N, Rubenstein LZ. Fall risk assessment measures: an analytic review. *J Gerontol A Biol Sci Med Sci*. 2001 Dec;56(12):M761-6.
21. Kehinde JO. Instruments for measuring fall risk in older adults living in long-term care facilities: an integrative review. *J Gerontol Nurs*. 2009 Oct;35(10):46-55.
22. Scott V, Votova K, Scanlan A, Close J. Multifactorial and functional mobility assessment tools for fall risk among older adults in community, home-support, long-term and acute care settings. *Age Ageing*. 2007 Mar;36(2):130-9.
23. Expertisecentrum Val- en fractuurpreventie Vlaanderen. Vlaamse richtlijn “Valpreventie in woonzorgcentra”. opdracht van de Werkgroep Ontwikkeling Richtlijnen Eerste Lijn (WOREL): van EBPracticenet; 2022.

24. Nederlandse Vereniging voor Klinische Geriatrie. Preventie van valincidenten bij ouderen: NVKG (Nederlandse Vereniging voor Klinische Geriatrie); 2017.
25. Nordin E, Lindelof N, Rosendahl E, Jensen J, Lundin-Olsson L. Prognostic validity of the Timed Up-and-Go test, a modified Get-Up-and-Go test, staff's global judgement and fall history in evaluating fall risk in residential care facilities. *Age Ageing*. 2008 Jul;37(4):442-8.
26. Vlaeyen E, Poels J, Colemonts U, Peeters L, Leysens G, Delbaere K, et al. Predicting Falls in Nursing Homes: A Prospective Multicenter Cohort Study Comparing Fall History, Staff Clinical Judgment, the Care Home Falls Screen, and the Fall Risk Classification Algorithm. *J Am Med Dir Assoc*. 2021 Feb;22(2):380-7.
27. Barker AL, Nitz JC, Low Choy NL, Haines T. Measuring fall risk and predicting who will fall: clinimetric properties of four fall risk assessment tools for residential aged care. *J Gerontol A Biol Sci Med Sci*. 2009 Aug;64(8):916-24.
28. Bentzen H, Bergland A, Forsen L. Diagnostic accuracy of three types of fall risk methods for predicting falls in nursing homes. *Aging Clin Exp Res*. 2011 Jun;23(3):187-95.
29. Delbaere K, Close JC, Menz HB, Cumming RG, Cameron ID, Sambrook PN, et al. Development and validation of fall risk screening tools for use in residential aged care facilities. *Med J Aust*. 2008 Aug 18;189(4):193-6.
30. Vlaeyen E, Coussement J, Leysens G, Van der Elst E, Delbaere K, Cambier D, et al. Characteristics and effectiveness of fall prevention programs in nursing homes: a systematic review and meta-analysis of randomized controlled trials. *J Am Geriatr Soc*. 2015 Feb;63(2):211-21.
31. Gulka HJ, Patel V, Arora T, McArthur C, Iaboni A. Efficacy and Generalizability of Falls Prevention Interventions in Nursing Homes: A Systematic Review and Meta-analysis. *J Am Med Dir Assoc*. 2020 Aug;21(8):1024-35 e4.
32. Logan PA, Horne JC, Gladman JRF, Gordon AL, Sach T, Clark A, et al. Multifactorial falls prevention programme compared with usual care in UK care homes for older people: multicentre cluster randomised controlled trial with economic evaluation. *BMJ*. 2021 Dec 7;375:e066991.
33. RNAO (Registered Nurse's Association of Ontario). Preventing Falls and Reducing Injury from Falls. 2017:132.
34. Vlaeyen E, Stas J, Leysens G, Van der Elst E, Janssens E, Dejaeger E, et al. Implementation of fall prevention in residential care facilities: A systematic review of barriers and facilitators. *Int J Nurs Stud*. 2017 May;70:110-21.
35. Zia A, Kamaruzzaman SB, Myint PK, Tan MP. The association of antihypertensives with postural blood pressure and falls among seniors residing in the community: a case-control study. *Eur J Clin Invest*. 2015 Oct;45(10):1069-76.
36. Logan P, McCartney K, Armstrong S, et al. Evaluation of the Guide to Action Care Home fall prevention programme in care homes for older people: protocol for a multicentre, single-blinded, cluster randomized controlled trial (FinCH). East Midlands Research into Ageing Network (EMRAN) Discussion Paper Series, 2019.
37. Walker GM, Armstrong S, Gordon AL, Gladman J, Robertson K, Ward M, et al. The Falls In Care Home study: a feasibility randomized controlled trial of the use of a risk assessment and decision support tool to prevent falls in care homes. *Clin Rehabil*. 2016 Oct;30(10):972-83.
38. Logan PA, Horne JC, Allen F, Armstrong SJ, Clark AB, Conroy S, et al. A multidomain decision support tool to prevent falls in older people: the FinCH cluster RCT. *Health Technol Assess*. 2022 Jan;26(9):1-136.
39. Beauchet O, Dubost V, Revel Delhom C, Berrut G, Belmin J, French Society of G, et al. How to manage recurrent falls in clinical practice: guidelines of the French Society of Geriatrics and Gerontology. *J Nutr Health Aging*. 2011 Jan;15(1):79-84.
40. Beuscart JB, Pelayo S, Robert L, Thevelin S, Marien S, Dalleur O. Medication review and reconciliation in older adults. *Eur Geriatr Med*. 2021 Jun;12(3):499-507.
41. National Institute for Health and Care Excellence (NICE). Falls in older people: assessing risk and prevention. National Institute for Health and Care Excellence; 2013; Available from: <https://www.nice.org.uk/guidance/cg161>.
42. Brugnolli A, Canzan F, Mortari L, Saiani L, Ambrosi E, Debiassi M. The Effectiveness of Educational Training or Multicomponent Programs to Prevent the Use of Physical Restraints in Nursing Home Settings: A Systematic Review and Meta-Analysis of Experimental Studies. *Int J Environ Res Public Health*. 2020 Sep 16;17(18).
43. Gulpers MJ, Bleijlevens MH, Ambergen T, Capezuti E, van Rossum E, Hamers JP. Reduction of belt restraint use: long-term effects of the EXBELT intervention. *J Am Geriatr Soc*. 2013 Jan;61(1):107-12.
44. Huizing AR, Hamers JP, Gulpers MJ, Berger MP. A cluster-randomized trial of an educational intervention to reduce the use of physical restraints with psychogeriatric nursing home residents. *J Am Geriatr Soc*. 2009 Jul;57(7):1139-48.
45. Kopke S, Muhlhauser I, Gerlach A, Haut A, Haastert B, Mohler R, et al. Effect of a guideline-based multicomponent intervention on use of physical restraints in nursing homes: a randomized controlled trial. *JAMA*. 2012 May 23;307(20):2177-84.

46. Bolland MJ, Grey A, Avenell A. Effects of vitamin D supplementation on musculoskeletal health: a systematic review, meta-analysis, and trial sequential analysis. *Lancet Diabetes Endocrinol.* 2018 Nov;6(11):847-58.
47. Iuliano S, Poon S, Robbins J, Bui M, Wang X, De Groot L, et al. Effect of dietary sources of calcium and protein on hip fractures and falls in older adults in residential care: cluster randomised controlled trial. *BMJ.* 2021 Oct 20;375:n2364.
48. Walker P, Kifley A, Kurrle S, Cameron ID. Increasing the uptake of vitamin D supplement use in Australian residential aged care facilities: results from the vitamin D implementation (ViDAus) study. *BMC Geriatr.* 2020 Oct 6;20(1):383.
49. World Health Organization. WHO guidelines on physical activity and sedentary behaviour. Geneva: World Health Organization, 2020 Contract No.: Licence: CC BY-NC-SA 3.0 IGO.
50. Ekelund U, Brown WJ, Steene-Johannessen J, Fagerland MW, Owen N, Powell KE, et al. Do the associations of sedentary behaviour with cardiovascular disease mortality and cancer mortality differ by physical activity level? A systematic review and harmonised meta-analysis of data from 850 060 participants. *Br J Sports Med.* 2019 Jul;53(14):886-94.
51. Ekelund U, Steene-Johannessen J, Brown WJ, Fagerland MW, Owen N, Powell KE, et al. Does physical activity attenuate, or even eliminate, the detrimental association of sitting time with mortality? A harmonised meta-analysis of data from more than 1 million men and women. *Lancet.* 2016 Sep 24;388(10051):1302-10.
52. de Rezende LF, Rey-Lopez JP, Matsudo VK, do Carmo Luiz O. Sedentary behavior and health outcomes among older adults: a systematic review. *BMC Public Health.* 2014 Apr 9;14:333.

## Working Group 6: Falls and Cognition

### Recommendations for Working Group 6: Falls and Cognition

**Recommendation 1 Assessment): We recommend that routine assessment of cognition should be included as part of multifactorial falls risk assessment in older adults. GRADE: 1B**

| <b>Population:</b>             | Older adults                    | <i>Objective: Over one third of community-dwelling older adults experience at least one fall each year and the occurrence of falls rises steadily with age. However, this rate is doubled in older adults with cognitive impairment [1]. Older adults with cognitive impairments are admitted to institutional care facilities five times more often than older adults without cognitive impairment because of a fall [3]. The length of hospital stay is at least nine days longer than the average length of stay for all causes of hospitalization in Canada [4]. They are also at high risk of major falls-related injuries (e.g., fracture and head injuries) and mortality [5]. The objective was to review the literature to assess the extent to which cognitive impairment contributes to falls and falls injury risk and if cognitive assessment should be recommended as part of standard falls risk assessment protocols.</i> |                   |                                         |
|--------------------------------|---------------------------------|-------------------------------------------------------------------------------------------------------------------------------------------------------------------------------------------------------------------------------------------------------------------------------------------------------------------------------------------------------------------------------------------------------------------------------------------------------------------------------------------------------------------------------------------------------------------------------------------------------------------------------------------------------------------------------------------------------------------------------------------------------------------------------------------------------------------------------------------------------------------------------------------------------------------------------------------|-------------------|-----------------------------------------|
| <b>Intervention:</b>           | Cognition assessment            |                                                                                                                                                                                                                                                                                                                                                                                                                                                                                                                                                                                                                                                                                                                                                                                                                                                                                                                                           |                   |                                         |
| <b>Comparison:</b>             | No cognition<br>No comparison   |                                                                                                                                                                                                                                                                                                                                                                                                                                                                                                                                                                                                                                                                                                                                                                                                                                                                                                                                           |                   |                                         |
| <b>Main outcomes:</b>          | Falls                           |                                                                                                                                                                                                                                                                                                                                                                                                                                                                                                                                                                                                                                                                                                                                                                                                                                                                                                                                           |                   |                                         |
| <b>Setting:</b>                | Community-dwelling older adults |                                                                                                                                                                                                                                                                                                                                                                                                                                                                                                                                                                                                                                                                                                                                                                                                                                                                                                                                           |                   |                                         |
| <b>Perspective:</b>            | Population                      |                                                                                                                                                                                                                                                                                                                                                                                                                                                                                                                                                                                                                                                                                                                                                                                                                                                                                                                                           |                   |                                         |
| Decision Domain                |                                 | Judgements                                                                                                                                                                                                                                                                                                                                                                                                                                                                                                                                                                                                                                                                                                                                                                                                                                                                                                                                | Research Evidence | Additional Considerations /Explanations |
| <b>Priority of the Problem</b> | Is the problem a priority?      | <ul style="list-style-type: none"> <li><input type="radio"/> No</li> <li><input type="radio"/> Probably no</li> <li><input type="radio"/> Uncertain</li> <li><input type="radio"/> Probably yes</li> <li><input checked="" type="radio"/> <b>Yes</b></li> <li><input type="radio"/> Varies</li> </ul>                                                                                                                                                                                                                                                                                                                                                                                                                                                                                                                                                                                                                                     |                   |                                         |

|                                                 |                                                                                                                                              |                                                                                                                                                                                                                                                                                                         |                                                              |                            |                                          |       |
|-------------------------------------------------|----------------------------------------------------------------------------------------------------------------------------------------------|---------------------------------------------------------------------------------------------------------------------------------------------------------------------------------------------------------------------------------------------------------------------------------------------------------|--------------------------------------------------------------|----------------------------|------------------------------------------|-------|
| Benefits and harms<br>(see below)               | Is there important uncertainty or variability in how much patients, researchers, clinicians and stake holders value the main outcomes?       | <ul style="list-style-type: none"> <li>○ Important uncertainty or variability</li> <li>○ Possibly important uncertainty or variability</li> <li>○ Probably no important uncertainty of variability</li> <li>➤ <b>No important uncertainty of variability</b></li> <li>○ No known undesirable</li> </ul> | <b>Relative importance of the main outcomes of interest:</b> |                            |                                          | None. |
|                                                 |                                                                                                                                              |                                                                                                                                                                                                                                                                                                         | <b>Outcome</b>                                               | <b>Relative Importance</b> | <b>Certainty of the evidence (GRADE)</b> |       |
|                                                 |                                                                                                                                              |                                                                                                                                                                                                                                                                                                         | Falls                                                        | Critical                   | ⊕⊕⊕○<br>MODERATE                         |       |
|                                                 |                                                                                                                                              |                                                                                                                                                                                                                                                                                                         | Falls with serious injury                                    | Critical                   | ⊕⊕⊕○<br>MODERATE                         |       |
|                                                 |                                                                                                                                              |                                                                                                                                                                                                                                                                                                         | Falls with fractures                                         | Critical                   | ⊕⊕⊕○<br>MODERATE                         |       |
|                                                 |                                                                                                                                              |                                                                                                                                                                                                                                                                                                         |                                                              |                            | ○○○○<br>MODERATE                         |       |
|                                                 |                                                                                                                                              |                                                                                                                                                                                                                                                                                                         |                                                              |                            | ○○○○<br>MODERATE                         |       |
|                                                 |                                                                                                                                              |                                                                                                                                                                                                                                                                                                         |                                                              |                            | ○○○○<br>MODERATE                         |       |
|                                                 |                                                                                                                                              |                                                                                                                                                                                                                                                                                                         |                                                              |                            | ○○○○<br>MODERATE                         |       |
|                                                 |                                                                                                                                              |                                                                                                                                                                                                                                                                                                         |                                                              |                            | ○○○○<br>MODERATE                         |       |
| What is the overall certainty of this evidence? | <ul style="list-style-type: none"> <li>○ No studies</li> <li>○ Very low</li> <li>○ Low</li> <li>➤ <b>Moderate</b></li> <li>○ High</li> </ul> |                                                                                                                                                                                                                                                                                                         |                                                              |                            |                                          |       |



|                                                                                                                                                                                                                                                                    |                                                                                                                                                                                    |                                                            |                                                   |                                                                                                                                                |                                                     |                                                                      |  |
|--------------------------------------------------------------------------------------------------------------------------------------------------------------------------------------------------------------------------------------------------------------------|------------------------------------------------------------------------------------------------------------------------------------------------------------------------------------|------------------------------------------------------------|---------------------------------------------------|------------------------------------------------------------------------------------------------------------------------------------------------|-----------------------------------------------------|----------------------------------------------------------------------|--|
| <input type="checkbox"/> How substantial are the desirable anticipated effects of the intervention? <ul style="list-style-type: none"> <li>Large</li> <li>➤ <b>Moderate</b></li> <li>○ Small</li> <li>○ Trivial</li> <li>○ Varies</li> <li>○ Don't know</li> </ul> | <b>Summary of findings (GRADE):1B</b>                                                                                                                                              |                                                            |                                                   | Montero Odasso et al., 2021 reported GRADE for the included guidelines=1A<br>* Community-dwelling older adults<br>** long-term care facilities |                                                     |                                                                      |  |
| How substantial are the undesirable anticipated effects of the intervention?                                                                                                                                                                                       | <ul style="list-style-type: none"> <li>➤ <b>Trivial</b></li> <li>○ Small</li> <li>○ Moderate</li> <li>○ Large</li> <li>○ Varies</li> <li>○ Don't know</li> </ul>                   | <b>Outcome</b>                                             | <b>Nº of patients</b>                             |                                                                                                                                                | <b>Effect</b>                                       | No data available on harms that are related to cognitive assessment. |  |
|                                                                                                                                                                                                                                                                    |                                                                                                                                                                                    | <b>Intervention</b>                                        | <b>Control</b>                                    | <b>Relative / Absolute (95% CI)</b>                                                                                                            |                                                     |                                                                      |  |
|                                                                                                                                                                                                                                                                    |                                                                                                                                                                                    | Falls Risk                                                 | From systematic review and meta-analysis (n=8191) | From systematic review and meta-analysis (n=18219)                                                                                             | OR=1.33 (1.18– 1.49) *<br>OR: 1.88 (1.54 – 2.30) ** |                                                                      |  |
|                                                                                                                                                                                                                                                                    |                                                                                                                                                                                    | Falls-related injury                                       | From systematic review and meta-analysis (n=1246) | From systematic review and meta-analysis(n=16572)                                                                                              | OR=2.33 (1.61, 3.36)                                |                                                                      |  |
|                                                                                                                                                                                                                                                                    |                                                                                                                                                                                    | Falls resulting in a fracture                              | From systematic review and meta-analysis(n=1233)  | From systematic review and meta-analysis(n=13919)                                                                                              | RR=1.78 (1.34, 2.37)                                |                                                                      |  |
| Does the balance between desirable effects and undesirable effects favour the option of the comparison?                                                                                                                                                            | <ul style="list-style-type: none"> <li>➤ <b>Favours the option</b></li> <li>○ Probably favours the option</li> <li>○ Does not favour either</li> <li>○ Probably favours</li> </ul> | Risk of falls related injury (global cognitive impairment) |                                                   |                                                                                                                                                | OR: 2.13 (1.56 – 2.90)                              |                                                                      |  |

|  |  |                                                                                                                    |                                                                     |  |  |                                   |  |
|--|--|--------------------------------------------------------------------------------------------------------------------|---------------------------------------------------------------------|--|--|-----------------------------------|--|
|  |  | <p>the comparison</p> <ul style="list-style-type: none"> <li>○ Favours the comparison</li> <li>○ Varies</li> </ul> | <p>Risk of falls related injury (Executive function impairment)</p> |  |  | <p>OR: 1.44<br/>(1.20 – 1.73)</p> |  |
|--|--|--------------------------------------------------------------------------------------------------------------------|---------------------------------------------------------------------|--|--|-----------------------------------|--|

|                                                                        |                                                                                                                                                                             |                                                                                                                                                                                                                                                       |                                                                                                                                                                                                                                                              |                                                                      |
|------------------------------------------------------------------------|-----------------------------------------------------------------------------------------------------------------------------------------------------------------------------|-------------------------------------------------------------------------------------------------------------------------------------------------------------------------------------------------------------------------------------------------------|--------------------------------------------------------------------------------------------------------------------------------------------------------------------------------------------------------------------------------------------------------------|----------------------------------------------------------------------|
| Values and preferences                                                 | Is there similarity about how much patients, researchers, clinicians and stake holders value the main Outcomes? Also include adverse effects and burden of the intervention | <ul style="list-style-type: none"> <li>○ No</li> <li>○ Probably no</li> <li>➤ <b>Uncertain</b></li> <li>○ Probably yes</li> <li>○ Yes</li> <li>○ Varies</li> </ul>                                                                                    | Number of clinical practice guidelines recommended to address cognitive impairment during falls risk assessment and management in both community setting and clinical practice. However, there is limited evidence of patient value and preference on falls. |                                                                      |
|                                                                        | Resources                                                                                                                                                                   | What is the certainty of the evidence of resources requirements (costs)?                                                                                                                                                                              | <ul style="list-style-type: none"> <li>○ No studies</li> <li>○ Very low</li> <li>➤ <b>Low</b></li> <li>○ Moderate</li> <li>○ High</li> </ul>                                                                                                                 | There are freely available cognitive tests (ie. MoCA and TMT A & B). |
| Does the cost effectiveness favour the intervention or the comparison? |                                                                                                                                                                             | <ul style="list-style-type: none"> <li>➤ <b>Favours the option</b></li> <li>○ Probably favours the option</li> <li>○ Does not favour either</li> <li>○ Probably favours the comparison</li> <li>○ Favours the comparison</li> <li>○ Varies</li> </ul> | Cognitive tests such as MoCA and TMT A & B are freely available. Assessing cognitive impairment during falls risk assessment could prevent falls and falls-related injury, reducing the healthcare costs in long-term.                                       |                                                                      |

|               |                                               |                                                                                                                                                                                          |                                                                                                                                                                                 |  |
|---------------|-----------------------------------------------|------------------------------------------------------------------------------------------------------------------------------------------------------------------------------------------|---------------------------------------------------------------------------------------------------------------------------------------------------------------------------------|--|
| Equity        | What would be the impact on health equity?    | <ul style="list-style-type: none"> <li>○ Increased</li> <li>○ Probably increased</li> <li>➤ <b>Uncertain</b></li> <li>○ Probably reduced</li> <li>○ Reduced</li> <li>○ Varies</li> </ul> | Some cognitive tests are time-consuming and requires specialized training. These tests may not be applicable for the clinics or settings with low resources.                    |  |
| Acceptability | Is the option acceptable to key stakeholders? | <ul style="list-style-type: none"> <li>○ No</li> <li>○ Probably no</li> <li>○ Uncertain</li> <li>○ Probably yes</li> <li>➤ <b>Yes</b></li> <li>○ Varies</li> </ul>                       | Number of clinical practice guidelines recommended to address cognitive impairment during falls risk assessment and management in both community setting and clinical practice. |  |

|             |                                            |                                                                                                                                                                    |                                                                                                                                                                                                                                                                                                |  |
|-------------|--------------------------------------------|--------------------------------------------------------------------------------------------------------------------------------------------------------------------|------------------------------------------------------------------------------------------------------------------------------------------------------------------------------------------------------------------------------------------------------------------------------------------------|--|
| Feasibility | Is the intervention feasible to implement? | <ul style="list-style-type: none"> <li>○ No</li> <li>○ Probably no</li> <li>○ Uncertain</li> <li>○ Probably yes</li> <li>➤ <b>Yes</b></li> <li>○ Varies</li> </ul> | There are freely available cognitive tests (ie. MoCA and TMT A & B) and requires no specialized training. Both MoCA and TMT A & B are easy to perform and takes less than 10 minutes to complete. The MoCA and TMT A and B are recommended as at minimum-battery to assess cognition function. |  |
|-------------|--------------------------------------------|--------------------------------------------------------------------------------------------------------------------------------------------------------------------|------------------------------------------------------------------------------------------------------------------------------------------------------------------------------------------------------------------------------------------------------------------------------------------------|--|

**Should assessment of cognition be included as part of multifactorial falls risk assessment in older adults?**

| Type of recommendation        | Strong recommendation against the intervention<br>○                                                                                                                                                                                                                                                                                                                                                                                                                                                                                                                                                                                                                                                                                                                                                                                                                                                                                                                                                                                                                                                                                                            | Weak recommendation against the intervention<br>○ | Conditional recommendation for either the intervention or the comparison<br>○ | Weak recommendation for the intervention<br>○ | Strong recommendation for the intervention<br>● |
|-------------------------------|----------------------------------------------------------------------------------------------------------------------------------------------------------------------------------------------------------------------------------------------------------------------------------------------------------------------------------------------------------------------------------------------------------------------------------------------------------------------------------------------------------------------------------------------------------------------------------------------------------------------------------------------------------------------------------------------------------------------------------------------------------------------------------------------------------------------------------------------------------------------------------------------------------------------------------------------------------------------------------------------------------------------------------------------------------------------------------------------------------------------------------------------------------------|---------------------------------------------------|-------------------------------------------------------------------------------|-----------------------------------------------|-------------------------------------------------|
| Recommendation                | Recommendation 1: We recommend that routine assessment of cognition should be included as part of multifactorial falls risk assessment in older adults.<br>GRADE: 1B                                                                                                                                                                                                                                                                                                                                                                                                                                                                                                                                                                                                                                                                                                                                                                                                                                                                                                                                                                                           |                                                   |                                                                               |                                               |                                                 |
| Justification                 | There is moderate evidence that low cognitive performance, even in those not clinically labelled as cognitively impaired, is associated with higher risk of falls and injuries due to falls [6]. Specifically, in those with cognitive impairment and a clinical diagnosis of mild cognitive impairment or dementia, falls are associated with greater occurrence of injury, disability, and hospitalization [5,6]. Therefore, cognitive assessment must be an essential component of any multifactorial fall assessment.                                                                                                                                                                                                                                                                                                                                                                                                                                                                                                                                                                                                                                      |                                                   |                                                                               |                                               |                                                 |
| Subgroup considerations       | Our recommendations apply to all the settings including hospitals and nursing homes, and aligns with recommendation from nursing homes and hospitalized patients (working group 5) and multidomain intervention (working group 10).                                                                                                                                                                                                                                                                                                                                                                                                                                                                                                                                                                                                                                                                                                                                                                                                                                                                                                                            |                                                   |                                                                               |                                               |                                                 |
| Implementation considerations | The global cognitive impairment assessed by the Mini-Mental State Exam (MMSE) and executive function impairment measured using the Trial Making Test B (TMT-B) and a computerised neuropsychological test battery (NTB) are associated with an increased falls risk [4]. In high functional older adults, global cognitive tests that have more items representing executive function, like MoCA test, will be better to detect subtle impairment. The screening tools like MoCA are available in multiple languages and has been recently recommended as global cognition test for assessing an interaction between mobility, cognition, and falls, although limitations regarding education bias have been acknowledged [9]. Cognitive test battery including the MoCA, TMT A and B, Digit Symbol Substitution Test, Stroop test, and Rey Auditory Verbal Learning Test could be a successful screening tools if feasible [10]. In settings where formal neuropsychological testing is not available, the MoCA and TMT A and B should be considered [10]. It is important that the assessors are trained to administer cognitive tests in a standard manner. |                                                   |                                                                               |                                               |                                                 |
| Monitoring and evaluation     | We could not find high level evidence for how frequently cognition should be assessed or monitored in older adults in clinic or community settings. Experts believe that cognition should be an integral part of any multifactorial falls risk assessments. For instance, if a multifactorial falls risk assessment is performed every year, then cognition should also be tested at the same visit or frequency. Education level need to be considered when selecting and interpreting cognitive assessments, as part of the fall assessment.                                                                                                                                                                                                                                                                                                                                                                                                                                                                                                                                                                                                                 |                                                   |                                                                               |                                               |                                                 |

|                     |                                                                                                                                                                                                                                                                                                                                                                                                                                                                                                                                                                                                                                                                                                                                                                                                                                                                                                        |
|---------------------|--------------------------------------------------------------------------------------------------------------------------------------------------------------------------------------------------------------------------------------------------------------------------------------------------------------------------------------------------------------------------------------------------------------------------------------------------------------------------------------------------------------------------------------------------------------------------------------------------------------------------------------------------------------------------------------------------------------------------------------------------------------------------------------------------------------------------------------------------------------------------------------------------------|
| Research Priorities | <p>The clinical validity and utility of cognitive assessments (general mental status as well as specific cognitive domains) in the context of falls prevention studies need to be established. Future fall prevention studies need to be more inclusive of cognitively impaired participants particularly early dementia stage since this is a population at higher risk of falling with relatively preserved mobility independence in the community. There is also a need for identifying unique risk factors for falls in cognitively impaired patients with a view of developing targeted pragmatic interventions (e.g. inclusion of participant's choice of the intervention, taking into consideration the physical limits of a participant, involving caregivers in delivering the intervention, training health care workers on how to deliver the intervention) in this at-risk population</p> |
|---------------------|--------------------------------------------------------------------------------------------------------------------------------------------------------------------------------------------------------------------------------------------------------------------------------------------------------------------------------------------------------------------------------------------------------------------------------------------------------------------------------------------------------------------------------------------------------------------------------------------------------------------------------------------------------------------------------------------------------------------------------------------------------------------------------------------------------------------------------------------------------------------------------------------------------|

## Recommendations for Working Group 6: Falls and Cognition

**Recommendation 2 (Assessment):** We recommend including both the older adults and caregiver’s perspective, when creating the individual falls prevention care plans for adults with cognitive impairment since this strategy has shown better adherence to interventions and outcomes. **GRADE: 1C.**

| <b>Population:</b>      | Older adults with cognitive impairment (mean age 82.2 ±7.5 years, F (72%), MoCA<24) | <b>Objective:</b> To review the literature to evaluate whether patients and /or caregivers should be involved in ascertaining fall history and planning falls risk reduction strategies. |                                                                                                                                                                                                                                                                                                                                                                                                                                                                                                                                                                                                                                                                                                                                                                                                                                                                                                                                                                                                                                                                                                                                                                                                                                                                                                                                                                                                                         |                                         |
|-------------------------|-------------------------------------------------------------------------------------|------------------------------------------------------------------------------------------------------------------------------------------------------------------------------------------|-------------------------------------------------------------------------------------------------------------------------------------------------------------------------------------------------------------------------------------------------------------------------------------------------------------------------------------------------------------------------------------------------------------------------------------------------------------------------------------------------------------------------------------------------------------------------------------------------------------------------------------------------------------------------------------------------------------------------------------------------------------------------------------------------------------------------------------------------------------------------------------------------------------------------------------------------------------------------------------------------------------------------------------------------------------------------------------------------------------------------------------------------------------------------------------------------------------------------------------------------------------------------------------------------------------------------------------------------------------------------------------------------------------------------|-----------------------------------------|
| <b>Intervention:</b>    | Multifactorial falls risk assessment                                                |                                                                                                                                                                                          |                                                                                                                                                                                                                                                                                                                                                                                                                                                                                                                                                                                                                                                                                                                                                                                                                                                                                                                                                                                                                                                                                                                                                                                                                                                                                                                                                                                                                         |                                         |
| <b>Comparison:</b>      | None                                                                                |                                                                                                                                                                                          |                                                                                                                                                                                                                                                                                                                                                                                                                                                                                                                                                                                                                                                                                                                                                                                                                                                                                                                                                                                                                                                                                                                                                                                                                                                                                                                                                                                                                         |                                         |
| <b>Main outcomes:</b>   | Number of Falls/fallers (n=24)                                                      |                                                                                                                                                                                          |                                                                                                                                                                                                                                                                                                                                                                                                                                                                                                                                                                                                                                                                                                                                                                                                                                                                                                                                                                                                                                                                                                                                                                                                                                                                                                                                                                                                                         |                                         |
| <b>Setting:</b>         | Long-term care homes, community, hospital                                           |                                                                                                                                                                                          |                                                                                                                                                                                                                                                                                                                                                                                                                                                                                                                                                                                                                                                                                                                                                                                                                                                                                                                                                                                                                                                                                                                                                                                                                                                                                                                                                                                                                         |                                         |
| <b>Perspective:</b>     | Population                                                                          |                                                                                                                                                                                          |                                                                                                                                                                                                                                                                                                                                                                                                                                                                                                                                                                                                                                                                                                                                                                                                                                                                                                                                                                                                                                                                                                                                                                                                                                                                                                                                                                                                                         |                                         |
| Decision Domain         |                                                                                     | Judgements                                                                                                                                                                               | Research Evidence                                                                                                                                                                                                                                                                                                                                                                                                                                                                                                                                                                                                                                                                                                                                                                                                                                                                                                                                                                                                                                                                                                                                                                                                                                                                                                                                                                                                       | Additional Considerations /Explanations |
| Priority of the Problem | Is the problem a priority?                                                          | <ul style="list-style-type: none"> <li>○ No</li> <li>○ Probably no</li> <li>○ Uncertain</li> <li>○ Probably yes</li> <li>● <b>Yes</b></li> <li>○ Varies</li> </ul>                       | <p>Our rapid review with 6 randomized controlled trials (RCT)[2, 8-12] with older adults exhibiting cognitive impairment reveals that involving caregivers in creating, implementing, and evaluating the care plan for falls risk reduction have better adherence [1]. However, caregiver involvement was identified as incidental findings in these studies and has limited level of evidence.</p> <p>An included study in the rapid review [2], pointed out that caregiver involvement is important for people living in long-term care homes as the staff turnover is higher in residential care facilities) and care plans are often not implemented properly if only staff are involved.</p> <p>6 out of 6 studies in the rapid review [1] stressed involving caregivers when implementing life style modification interventions such as dietary modification, vitamin D prescription, regular exercise and avoiding movement during sundowning (a clinical state of confusion characterized by early evening disruptive behaviours such as agitation, restlessness, irritability, disorientation, and being demanding and suspicious [3]) for people with mild to moderate cognitive impairment living in the community.</p> <p>All studies included in the scoping review [1] recommended involving caregivers in documenting a history of falls, especially in people with cognitive impairment who tend to</p> |                                         |
|                         |                                                                                     |                                                                                                                                                                                          |                                                                                                                                                                                                                                                                                                                                                                                                                                                                                                                                                                                                                                                                                                                                                                                                                                                                                                                                                                                                                                                                                                                                                                                                                                                                                                                                                                                                                         |                                         |

|  |  |  |                                           |  |
|--|--|--|-------------------------------------------|--|
|  |  |  | underreport falls due to impaired memory. |  |
|--|--|--|-------------------------------------------|--|

|                                                 |                                                                                                                                              |                                                                                                                                                                                                                                                                                                         |                                                              |                            |                                          |  |
|-------------------------------------------------|----------------------------------------------------------------------------------------------------------------------------------------------|---------------------------------------------------------------------------------------------------------------------------------------------------------------------------------------------------------------------------------------------------------------------------------------------------------|--------------------------------------------------------------|----------------------------|------------------------------------------|--|
| <b>Benefits and harms</b><br>(see below)        | Is there important uncertainty or variability in how much patients, researchers, clinicians and stake holders value the main outcomes?       | <ul style="list-style-type: none"> <li>○ Important uncertainty or variability</li> <li>○ Possibly important uncertainty or variability</li> <li>○ Probably no important uncertainty of variability</li> <li>● <b>No important uncertainty of variability</b></li> <li>○ No known undesirable</li> </ul> | <b>Relative importance of the main outcomes of interest:</b> |                            |                                          |  |
|                                                 |                                                                                                                                              |                                                                                                                                                                                                                                                                                                         | <b>Outcome</b>                                               | <b>Relative Importance</b> | <b>Certainty of the evidence (GRADE)</b> |  |
|                                                 |                                                                                                                                              |                                                                                                                                                                                                                                                                                                         | Concerns about falling                                       | Critical                   | ⊕⊕⊕○<br>MODERATE                         |  |
|                                                 |                                                                                                                                              |                                                                                                                                                                                                                                                                                                         | Balance                                                      | Critical                   | ⊕⊕⊕○<br>MODERATE                         |  |
|                                                 |                                                                                                                                              |                                                                                                                                                                                                                                                                                                         | Functional mobility                                          | Critical                   | ⊕⊕⊕○<br>MODERATE                         |  |
|                                                 |                                                                                                                                              |                                                                                                                                                                                                                                                                                                         | Number of falls                                              | Critical                   | ⊕○○○<br>LOW                              |  |
|                                                 |                                                                                                                                              |                                                                                                                                                                                                                                                                                                         |                                                              |                            | ○○○○<br>MODERATE                         |  |
|                                                 |                                                                                                                                              |                                                                                                                                                                                                                                                                                                         |                                                              |                            | ○○○○<br>MODERATE                         |  |
|                                                 |                                                                                                                                              |                                                                                                                                                                                                                                                                                                         |                                                              |                            | ○○○○<br>MODERATE                         |  |
|                                                 |                                                                                                                                              |                                                                                                                                                                                                                                                                                                         |                                                              |                            | ○○○○<br>MODERATE                         |  |
| What is the overall certainty of this evidence? | <ul style="list-style-type: none"> <li>○ No studies</li> <li>○ Very low</li> <li>○ Low</li> <li>● <b>Moderate</b></li> <li>○ High</li> </ul> |                                                                                                                                                                                                                                                                                                         |                                                              |                            |                                          |  |

|                     |                                                                                      |                                        |                        |
|---------------------|--------------------------------------------------------------------------------------|----------------------------------------|------------------------|
| How substantial are | <ul style="list-style-type: none"> <li>○ Large</li> <li>● <b>Moderate</b></li> </ul> | <b>Summary of findings (GRADE): 1B</b> | * (Racey et al., 2021) |
|---------------------|--------------------------------------------------------------------------------------|----------------------------------------|------------------------|



|                                                                                                         |                                                                                                                                                                                                                                                       |                                         |                         |                |                                     |                             |
|---------------------------------------------------------------------------------------------------------|-------------------------------------------------------------------------------------------------------------------------------------------------------------------------------------------------------------------------------------------------------|-----------------------------------------|-------------------------|----------------|-------------------------------------|-----------------------------|
| the desirable anticipated effects of the intervention?                                                  | <ul style="list-style-type: none"> <li>○ Small</li> <li>○ Trivial</li> <li>○ Varies</li> <li>○ Don't know</li> </ul>                                                                                                                                  | <b>Outcome</b>                          | <b>Nº of patients</b>   |                | <b>Effect</b>                       |                             |
|                                                                                                         |                                                                                                                                                                                                                                                       |                                         | <b>Intervention</b>     | <b>Control</b> | <b>Relative / Absolute (95% CI)</b> |                             |
|                                                                                                         |                                                                                                                                                                                                                                                       |                                         | Concerns about falling* |                |                                     | SMD= -0.73<br>(1.10, -0.36) |
|                                                                                                         |                                                                                                                                                                                                                                                       |                                         | Balance*                |                |                                     | SMD= 0.66<br>(0.19, 1.12)   |
| How substantial are the undesirable anticipated effects of the intervention?                            | <ul style="list-style-type: none"> <li>● <b>Trivial</b></li> <li>○ Small</li> <li>○ Moderate</li> <li>○ Large</li> <li>○ Varies</li> <li>○ Don't know</li> </ul>                                                                                      | Functional mobility (timed up and go) * |                         |                | SMD= 0.56<br>(-0.94, -0.17)         |                             |
|                                                                                                         |                                                                                                                                                                                                                                                       | Number of falls                         |                         |                | RR= 0.99<br>(0.60, 1.65)            |                             |
| Does the balance between desirable effects and undesirable effects favour the option of the comparison? | <ul style="list-style-type: none"> <li>● <b>Favours the option</b></li> <li>○ Probably favours the option</li> <li>○ Does not favour either</li> <li>○ Probably favours the comparison</li> <li>○ Favours the comparison</li> <li>○ Varies</li> </ul> |                                         |                         |                |                                     |                             |

|                                                                               |                                                                                                                                                                                        |                                                                                                                                                                                                                                                       |                                                                                                                                                           |                                                                                              |
|-------------------------------------------------------------------------------|----------------------------------------------------------------------------------------------------------------------------------------------------------------------------------------|-------------------------------------------------------------------------------------------------------------------------------------------------------------------------------------------------------------------------------------------------------|-----------------------------------------------------------------------------------------------------------------------------------------------------------|----------------------------------------------------------------------------------------------|
| <p style="text-align: center;"><b>Values and preferences</b></p>              | <p>Is there similarity about how much patients, researchers, clinicians and stake holders value the main Outcomes?<br/>Also include adverse effects and burden of the intervention</p> | <ul style="list-style-type: none"> <li>○ No</li> <li>○ Probably no</li> <li>○ Uncertain</li> <li>● <b>Uncertain</b></li> <li>○ Probably yes</li> <li>○ Yes</li> <li>○ Varies</li> </ul>                                                               |                                                                                                                                                           |                                                                                              |
|                                                                               | <p style="text-align: center;"><b>Resources</b></p>                                                                                                                                    | <p>What is the certainty of the evidence of resources requirements (costs)?</p>                                                                                                                                                                       | <ul style="list-style-type: none"> <li>○ No studies</li> <li>● <b>Very low</b></li> <li>○ Low</li> <li>○ Moderate</li> <li>○ High</li> </ul>              | <p>One study evaluated cost effectiveness but used hospitalization as a proxy indicator.</p> |
| <p>Does the cost effectiveness favour the intervention or the comparison?</p> |                                                                                                                                                                                        | <ul style="list-style-type: none"> <li>○ Favours the option</li> <li>● <b>Probably favours the option</b></li> <li>○ Does not favour either</li> <li>○ Probably favours the comparison</li> <li>○ Favours the comparison</li> <li>○ Varies</li> </ul> | <p>Exercise was delivered in a group setting (N=10) as part of standard of care. Exercise was delivered by the caregivers at home (N=6) with no cost.</p> |                                                                                              |

|               |                                               |                                                                                                                                                                                          |                                                                        |  |
|---------------|-----------------------------------------------|------------------------------------------------------------------------------------------------------------------------------------------------------------------------------------------|------------------------------------------------------------------------|--|
| Equity        | What would be the impact on health equity?    | <ul style="list-style-type: none"> <li>○ Increased</li> <li>➤ <b>Probably increased</b></li> <li>○ Uncertain</li> <li>○ Probably reduced</li> <li>○ Reduced</li> <li>○ Varies</li> </ul> | Older adults could enjoy exercise intervention without going to a Gym. |  |
| Acceptability | Is the option acceptable to key stakeholders? | <ul style="list-style-type: none"> <li>○ No</li> <li>○ Probably no</li> <li>○ Uncertain</li> <li>➤ <b>Probably yes</b></li> <li>○ Yes</li> <li>○ Varies</li> </ul>                       | Adherence was better when caregivers were involved                     |  |

|             |                                            |                                                                                                                                                                                                                       |                               |  |
|-------------|--------------------------------------------|-----------------------------------------------------------------------------------------------------------------------------------------------------------------------------------------------------------------------|-------------------------------|--|
| Feasibility | Is the intervention feasible to implement? | <input type="radio"/> No<br><input type="radio"/> Probably no<br><input type="radio"/> Uncertain<br><input checked="" type="radio"/> <b>Probably yes</b><br><input type="radio"/> Yes<br><input type="radio"/> Varies | No adverse event was reported |  |
|-------------|--------------------------------------------|-----------------------------------------------------------------------------------------------------------------------------------------------------------------------------------------------------------------------|-------------------------------|--|

**Should the inclusion of both, patients and caregivers perspective, when creating the individual falls prevention care plans for older adults with cognitive impairment since this strategy has shown better adherence to interventions and outcomes be recommended for older adults to prevent and manage falls?**

| Type of recommendation        | Strong recommendation against the intervention<br><input type="radio"/>                                                                                                                                                                                                                                                                                                                                                                                                                                                                                                                                                                                                                                              | Weak recommendation against the intervention<br><input type="radio"/> | Conditional recommendation for either the intervention or the comparison<br><input type="radio"/> | Weak recommendation for the intervention<br><input type="radio"/> | Strong recommendation for the intervention<br><input checked="" type="radio"/> |
|-------------------------------|----------------------------------------------------------------------------------------------------------------------------------------------------------------------------------------------------------------------------------------------------------------------------------------------------------------------------------------------------------------------------------------------------------------------------------------------------------------------------------------------------------------------------------------------------------------------------------------------------------------------------------------------------------------------------------------------------------------------|-----------------------------------------------------------------------|---------------------------------------------------------------------------------------------------|-------------------------------------------------------------------|--------------------------------------------------------------------------------|
| Recommendation                | Recommendation 2: We recommend including both the older adults and caregiver’s perspective, when creating the individual falls prevention care plans for adults with cognitive impairment since this strategy has shown better adherence to interventions and outcomes. GRADE: 1C.                                                                                                                                                                                                                                                                                                                                                                                                                                   |                                                                       |                                                                                                   |                                                                   |                                                                                |
| Justification                 | Although there is Low level of evidence for this recommendation, the working group considered this an important recommendation based on the rapid review conducted by the working group in 2022.                                                                                                                                                                                                                                                                                                                                                                                                                                                                                                                     |                                                                       |                                                                                                   |                                                                   |                                                                                |
| Subgroup considerations       | Our recommendations only apply to patients with cognitive impairment.                                                                                                                                                                                                                                                                                                                                                                                                                                                                                                                                                                                                                                                |                                                                       |                                                                                                   |                                                                   |                                                                                |
| Implementation considerations | <ul style="list-style-type: none"> <li>Caregivers should be involved when evaluating a history of falls in patients with cognitive impairment.</li> <li>Clinicians involved in care of people with cognitive impairment living in the community or in assisted care facilities should follow the STEADI Algorithm for Fall Risk Screening, Assessment, and Intervention [4] and involve caregivers in the assessment, risk factor education, patient education, evaluation, care planning, care implementation, and care evaluation process.</li> <li>Clinicians should follow the Stages of Change model [5] to assess the readiness of the patient and their caregiver to act on a new, safer behavior.</li> </ul> |                                                                       |                                                                                                   |                                                                   |                                                                                |
| Monitoring and evaluation     | Overall, all 28 studies included in our rapid review [1], suggested the importance of monitoring and evaluation of care plans involving falls risk reduction as adherence to these plans can vary.                                                                                                                                                                                                                                                                                                                                                                                                                                                                                                                   |                                                                       |                                                                                                   |                                                                   |                                                                                |
| Research Priorities           | Further research should focus on falls reduction in people with cognitive impairment given that we found that only 28 29 of 2,559 original research on fall reduction included people with cognitive impairment. Only 3 4 of these 28 29 papers included people with diagnosed dementia. Clearly, given their increased fall risk [6,7] compared to those with no cognitive impairment, older adults with cognitive impairment merit much greater focus in fall risk assessment and intervention research.                                                                                                                                                                                                           |                                                                       |                                                                                                   |                                                                   |                                                                                |

## References

1. Muir SW, Gopaul K, Montero Odasso MM. The role of cognitive impairment in fall risk among older adults: a systematic review and meta-analysis. *Age Ageing*. 2012 May;41(3):299-308.
2. Herman T, Mirelman A, Giladi N, Schweiger A, Hausdorff JM. Executive control deficits as a prodrome to falls in healthy older adults: a prospective study linking thinking, walking, and falling. *J Gerontol A Biol Sci Med Sci*. 2010 Oct;65(10):1086-92.
3. Tinetti ME, Speechley M, Ginter SF. Risk factors for falls among elderly persons living in the community. *N Engl J Med*. 1988 Dec 29;319(26):1701-7.
4. Morris JC, Rubin EH, Morris EJ, Mandel SA. Senile dementia of the Alzheimer's type: an important risk factor for serious falls. *J Gerontol*. 1987 Jul;42(4):412-7.
5. Public Health Agency of Canada Seniors' Falls in Canada: Second Report. 2014; Available from: [https://www.phac-aspc.gc.ca/seniors-aines/publications/public/injury-blessure/seniors\\_falls-chutes\\_aines/assets/pdf/seniors\\_falls-chutes\\_aines-eng.pdf](https://www.phac-aspc.gc.ca/seniors-aines/publications/public/injury-blessure/seniors_falls-chutes_aines/assets/pdf/seniors_falls-chutes_aines-eng.pdf).
6. Montero-Odasso MM, Kamkar N, Pieruccini-Faria F, Osman A, Sarquis-Adamson Y, Close J, et al. Evaluation of Clinical Practice Guidelines on Fall Prevention and Management for Older Adults: A Systematic Review. *JAMA Netw Open*. 2021 Dec 1;4(12):e2138911.
7. Williams-Roberts H, Arnold C, Kemp D, Crizzle A, Johnson S. Scoping Review of Clinical Practice Guidelines for Fall Risk Screening and Assessment in Older Adults across the Care Continuum. *Can J Aging*. 2021 Jun;40(2):206-23.
8. Beauchet O, Montero-Odasso M. Comprehensive falls assessment: cognitive impairment is a matter to consider. In: Montero-Odasso M, Camicioli R, editors. *Falls and Cognition in Older persons*. Cham: Springer; 2020. p. 87-106.
9. Montero-Odasso M, Speechley M. Falls in Cognitively Impaired Older Adults: Implications for Risk Assessment And Prevention. *J Am Geriatr Soc*. 2018 Feb;66(2):367-75.
10. Montero-Odasso M, Almeida QJ, Bherer L, Burhan AM, Camicioli R, Doyon J, et al. Consensus on Shared Measures of Mobility and Cognition: From the Canadian Consortium on Neurodegeneration in Aging (CCNA). *J Gerontol A Biol Sci Med Sci*. 2019 May 16;74(6):897-909.
11. Ferrer A, Formiga F, Sanz H, de Vries OJ, Badia T, Pujol R, et al. Multifactorial assessment and targeted intervention to reduce falls among the oldest-old: a randomized controlled trial. *Clin Interv Aging*. 2014;9:383-93.
12. Becker C, Kron M, Lindemann U, Sturm E, Eichner B, Walter-Jung B, et al. Effectiveness of a multifaceted intervention on falls in nursing home residents. *J Am Geriatr Soc*. 2003 Mar;51(3):306-13.
13. Wesson J, Clemson L, Brodaty H, Lord S, Taylor M, Gitlin L, et al. A feasibility study and pilot randomised trial of a tailored prevention program to reduce falls in older people with mild dementia. *BMC Geriatr*. 2013 Sep 3;13:89.
14. Crotty M, Whitehead C, Rowett D, Halbert J, Weller D, Finucane P, et al. An outreach intervention to implement evidence based practice in residential care: a randomized controlled trial [ISRCTN67855475]. *BMC Health Serv Res*. 2004 Apr 6;4(1):6.
15. Racey M, Markle-Reid M, Fitzpatrick-Lewis D, Ali MU, Gagne H, Hunter S, et al. Fall prevention in community-dwelling adults with mild to moderate cognitive impairment: a systematic review and meta-analysis. *BMC Geriatr*. 2021 Dec 10;21(1):689.
16. Toots A, Wiklund R, Littbrand H, Nordin E, Nordstrom P, Lundin-Olsson L, et al. The Effects of Exercise on Falls in Older People With Dementia Living in Nursing Homes: A Randomized Controlled Trial. *J Am Med Dir Assoc*. 2019 Jul;20(7):835-42 e1.
17. Sultana M, Alexander N, Pieruccini-Faria F, Hunter S, Kamkar N, Speechley M, et al. Falls prevention and management in older adults with cognitive impairment: A Scoping Review of the Recommendations. To be submitted.
18. Gnanasekaran G. "Sundowning" as a biological phenomenon: current understandings and future directions: an update. *Aging Clin Exp Res*. 2016 Jun;28(3):383-92.

## Working Group 7: Falls and Parkinson's disease

### Recommendations for Working Group 7: Falls and Parkinson's disease

**Recommendation 1 (Assessment): We conditionally recommend a falls risk assessment for older adults with Parkinson's Disease, including a self-report 3-risk factor assessment tool, which includes a history of falls in the previous year, freezing of gait (FOG) in the past month, and slow gait speed. GRADE: 2B**

| <i>Population:</i>      | Older adults with Parkinson's disease | <i>Objective:</i>                                                                                                                                                                                                                                                                                     |                   |                                         |
|-------------------------|---------------------------------------|-------------------------------------------------------------------------------------------------------------------------------------------------------------------------------------------------------------------------------------------------------------------------------------------------------|-------------------|-----------------------------------------|
| <i>Intervention:</i>    | N/A                                   |                                                                                                                                                                                                                                                                                                       |                   |                                         |
| <i>Comparison:</i>      | N/A                                   |                                                                                                                                                                                                                                                                                                       |                   |                                         |
| <i>Main outcomes:</i>   | Falls                                 |                                                                                                                                                                                                                                                                                                       |                   |                                         |
| <i>Setting:</i>         | Any setting                           |                                                                                                                                                                                                                                                                                                       |                   |                                         |
| <i>Perspective:</i>     | Population with PD                    |                                                                                                                                                                                                                                                                                                       |                   |                                         |
| Decision Domain         |                                       | Judgements                                                                                                                                                                                                                                                                                            | Research Evidence | Additional Considerations /Explanations |
| Priority of the Problem | Is the problem a priority?            | <ul style="list-style-type: none"> <li><input type="radio"/> No</li> <li><input type="radio"/> Probably no</li> <li><input checked="" type="radio"/> <b>Uncertain</b></li> <li><input type="radio"/> Probably yes</li> <li><input type="radio"/> Yes</li> <li><input type="radio"/> Varies</li> </ul> |                   |                                         |

|                                                 |                                                                                                                                              |                                                                                                                                                                                                                                                                                                         |                                                              |                            |                                          |       |
|-------------------------------------------------|----------------------------------------------------------------------------------------------------------------------------------------------|---------------------------------------------------------------------------------------------------------------------------------------------------------------------------------------------------------------------------------------------------------------------------------------------------------|--------------------------------------------------------------|----------------------------|------------------------------------------|-------|
| <b>Benefits and harms</b><br>(see below)        | Is there important uncertainty or variability in how much patients, researchers, clinicians and stake holders value the main outcomes?       | <ul style="list-style-type: none"> <li>○ Important uncertainty or variability</li> <li>○ Possibly important uncertainty or variability</li> <li>● <b>Probably no important uncertainty of variability</b></li> <li>○ No important uncertainty of variability</li> <li>○ No known undesirable</li> </ul> | <b>Relative importance of the main outcomes of interest:</b> |                            |                                          | None. |
|                                                 |                                                                                                                                              |                                                                                                                                                                                                                                                                                                         | <b>Outcome</b>                                               | <b>Relative Importance</b> | <b>Certainty of the evidence (GRADE)</b> |       |
|                                                 |                                                                                                                                              |                                                                                                                                                                                                                                                                                                         |                                                              |                            | ○○○○<br>MODERATE                         |       |
|                                                 |                                                                                                                                              |                                                                                                                                                                                                                                                                                                         |                                                              |                            | ○○○○<br>MODERATE                         |       |
|                                                 |                                                                                                                                              |                                                                                                                                                                                                                                                                                                         |                                                              |                            | ○○○○<br>MODERATE                         |       |
|                                                 |                                                                                                                                              |                                                                                                                                                                                                                                                                                                         |                                                              |                            | ○○○○<br>MODERATE                         |       |
|                                                 |                                                                                                                                              |                                                                                                                                                                                                                                                                                                         |                                                              |                            | ○○○○<br>MODERATE                         |       |
|                                                 |                                                                                                                                              |                                                                                                                                                                                                                                                                                                         |                                                              |                            | ○○○○<br>MODERATE                         |       |
|                                                 |                                                                                                                                              |                                                                                                                                                                                                                                                                                                         |                                                              |                            | ○○○○<br>MODERATE                         |       |
|                                                 |                                                                                                                                              |                                                                                                                                                                                                                                                                                                         |                                                              |                            | ○○○○<br>MODERATE                         |       |
| What is the overall certainty of this evidence? | <ul style="list-style-type: none"> <li>○ No studies</li> <li>● <b>Very low</b></li> <li>○ Low</li> <li>○ Moderate</li> <li>○ High</li> </ul> |                                                                                                                                                                                                                                                                                                         |                                                              | ○○○○<br>MODERATE           |                                          |       |

|                                                                                                         |                                                                                                                                                                                                                                                       |                                        |                                  |                |                   |                                     |
|---------------------------------------------------------------------------------------------------------|-------------------------------------------------------------------------------------------------------------------------------------------------------------------------------------------------------------------------------------------------------|----------------------------------------|----------------------------------|----------------|-------------------|-------------------------------------|
| How substantial are the desirable anticipated effects of the intervention?                              | <ul style="list-style-type: none"> <li>○ Large</li> <li>○ Moderate</li> <li>○ Small</li> <li>○ Trivial</li> <li>○ Varies</li> <li>● <b>Don't know</b></li> </ul>                                                                                      | <i>Summary of findings (GRADE): 2C</i> |                                  |                | HR = hazard ratio |                                     |
|                                                                                                         |                                                                                                                                                                                                                                                       | <b>Outcome</b>                         | <b>N<sub>o</sub> of patients</b> |                |                   | <b>Effect</b>                       |
|                                                                                                         |                                                                                                                                                                                                                                                       |                                        | <b>Intervention</b>              | <b>Control</b> |                   | <b>Relative / Absolute (95% CI)</b> |
|                                                                                                         |                                                                                                                                                                                                                                                       | New fall after enrolment <sup>3</sup>  | 2063 (PD)                        | 2063           |                   | HR = 1.8 (1.6 – 2.0)                |
| How substantial are the undesirable anticipated effects of the intervention?                            | <ul style="list-style-type: none"> <li>○ Trivial</li> <li>○ Small</li> <li>○ Moderate</li> <li>○ Large</li> <li>○ Varies</li> <li>● <b>Don't know</b></li> </ul>                                                                                      |                                        |                                  |                |                   |                                     |
| Does the balance between desirable effects and undesirable effects favour the option of the comparison? | <ul style="list-style-type: none"> <li>○ Favours the option</li> <li>○ Probably favours the option</li> <li>● <b>Does not favour either</b></li> <li>○ Probably favours the comparison</li> <li>○ Favours the comparison</li> <li>○ Varies</li> </ul> |                                        |                                  |                |                   |                                     |



|                                                                        |                                                                                                                                                                                |                                                                                                                                                                                                                                                                             |                                                                                                                                              |  |
|------------------------------------------------------------------------|--------------------------------------------------------------------------------------------------------------------------------------------------------------------------------|-----------------------------------------------------------------------------------------------------------------------------------------------------------------------------------------------------------------------------------------------------------------------------|----------------------------------------------------------------------------------------------------------------------------------------------|--|
| Values and preferences                                                 | Is there similarity about how much patients, researchers, clinicians and stake holders value the main Outcomes?<br>Also include adverse effects and burden of the intervention | <ul style="list-style-type: none"> <li>○ No</li> <li>○ Probably no</li> <li>● <b>Uncertain</b></li> <li>○ Probably yes</li> <li>○ Yes</li> <li>○ Varies</li> </ul>                                                                                                          |                                                                                                                                              |  |
|                                                                        | Resources                                                                                                                                                                      | What is the certainty of the evidence of resources requirements (costs)?                                                                                                                                                                                                    | <ul style="list-style-type: none"> <li>● <b>No studies</b></li> <li>○ Very low</li> <li>○ Low</li> <li>○ Moderate</li> <li>○ High</li> </ul> |  |
| Does the cost effectiveness favour the intervention or the comparison? |                                                                                                                                                                                | <ul style="list-style-type: none"> <li>● <b>No studies</b></li> <li>○ Favours the option</li> <li>○ Probably favours the option</li> <li>○ Does not favour either</li> <li>○ Probably favours the comparison</li> <li>○ Favours the comparison</li> <li>○ Varies</li> </ul> |                                                                                                                                              |  |

|               |                                               |                                                                                                                                                                                                                                                                                                                             |  |  |
|---------------|-----------------------------------------------|-----------------------------------------------------------------------------------------------------------------------------------------------------------------------------------------------------------------------------------------------------------------------------------------------------------------------------|--|--|
| Equity        | What would be the impact on health equity?    | <ul style="list-style-type: none"> <li><input type="radio"/> Increased</li> <li><input type="radio"/> Probably increased</li> <li><input checked="" type="radio"/> <b>Uncertain</b></li> <li><input type="radio"/> Probably reduced</li> <li><input type="radio"/> Reduced</li> <li><input type="radio"/> Varies</li> </ul> |  |  |
| Acceptability | Is the option acceptable to key stakeholders? | <ul style="list-style-type: none"> <li><input type="radio"/> No</li> <li><input type="radio"/> Probably no</li> <li><input checked="" type="radio"/> <b>Uncertain</b></li> <li><input type="radio"/> Probably yes</li> <li><input type="radio"/> Yes</li> <li><input type="radio"/> Varies</li> </ul>                       |  |  |

|             |                                            |                                                                                                                                                                                                                                                                                                       |  |  |
|-------------|--------------------------------------------|-------------------------------------------------------------------------------------------------------------------------------------------------------------------------------------------------------------------------------------------------------------------------------------------------------|--|--|
| Feasibility | Is the intervention feasible to implement? | <ul style="list-style-type: none"> <li><input type="radio"/> No</li> <li><input type="radio"/> Probably no</li> <li><input checked="" type="radio"/> <b>Uncertain</b></li> <li><input type="radio"/> Probably yes</li> <li><input type="radio"/> Yes</li> <li><input type="radio"/> Varies</li> </ul> |  |  |
|-------------|--------------------------------------------|-------------------------------------------------------------------------------------------------------------------------------------------------------------------------------------------------------------------------------------------------------------------------------------------------------|--|--|

**Should \_\_\_ be recommended for older adults to prevent and manage falls?**

| Type of recommendation        | Strong recommendation against the intervention<br><input type="radio"/>                                                                                                                                                                                                                                                                                                                                                                                      | Weak recommendation against the intervention<br><input type="radio"/> | Conditional recommendation for either the intervention or the comparison<br><input checked="" type="radio"/> | Weak recommendation for the intervention<br><input type="radio"/> | Strong recommendation for the intervention<br><input type="radio"/> |
|-------------------------------|--------------------------------------------------------------------------------------------------------------------------------------------------------------------------------------------------------------------------------------------------------------------------------------------------------------------------------------------------------------------------------------------------------------------------------------------------------------|-----------------------------------------------------------------------|--------------------------------------------------------------------------------------------------------------|-------------------------------------------------------------------|---------------------------------------------------------------------|
| Recommendation                | Recommendation 1: We conditionally recommend a falls risk assessment for older adults with Parkinson’s Disease, including a self-report 3-risk factor assessment tool, which includes a history of falls in the previous year, freezing of gait (FOG) in the past month, and slow gait speed. the past month and 3) slow gait, i.e., a timed gait speed of less than 1.1 m/s in addition to fall risk factors relevant to older adults in general. GRADE: 2B |                                                                       |                                                                                                              |                                                                   |                                                                     |
| Justification                 |                                                                                                                                                                                                                                                                                                                                                                                                                                                              |                                                                       |                                                                                                              |                                                                   |                                                                     |
| Subgroup considerations       |                                                                                                                                                                                                                                                                                                                                                                                                                                                              |                                                                       |                                                                                                              |                                                                   |                                                                     |
| Implementation considerations |                                                                                                                                                                                                                                                                                                                                                                                                                                                              |                                                                       |                                                                                                              |                                                                   |                                                                     |
| Monitoring and evaluation     |                                                                                                                                                                                                                                                                                                                                                                                                                                                              |                                                                       |                                                                                                              |                                                                   |                                                                     |
| Research Priorities           |                                                                                                                                                                                                                                                                                                                                                                                                                                                              |                                                                       |                                                                                                              |                                                                   |                                                                     |

## Recommendations for Working Group7: Falls and Parkinson’s disease

**Recommendation 1 (Management and Intervention): We conditionally recommend that older adults with Parkinson’s disease should be offered multidomain interventions, based on PD specific assessment and other identified falls risk factors. GRADE: 2B**

| <i>Population:</i>      | Older adults with Parkinson’s disease | <i>Objective:</i>                                                                                                                                           |                   |                                         |
|-------------------------|---------------------------------------|-------------------------------------------------------------------------------------------------------------------------------------------------------------|-------------------|-----------------------------------------|
| <i>Intervention:</i>    | Multidomain interventions             |                                                                                                                                                             |                   |                                         |
| <i>Comparison:</i>      | Usual care                            |                                                                                                                                                             |                   |                                         |
| <i>Main outcomes:</i>   | Falls                                 |                                                                                                                                                             |                   |                                         |
| <i>Setting:</i>         | Any setting                           |                                                                                                                                                             |                   |                                         |
| <i>Perspective:</i>     | PD population                         |                                                                                                                                                             |                   |                                         |
| Decision Domain         |                                       | Judgements                                                                                                                                                  | Research Evidence | Additional Considerations /Explanations |
| Priority of the Problem | Is the problem a priority?            | <ul style="list-style-type: none"> <li>○ No</li> <li>○ Probably no</li> <li>○ Uncertain</li> <li>○ Probably yes</li> <li>● Yes</li> <li>○ Varies</li> </ul> |                   |                                         |

|                                                 |                                                                                                                                              |                                                                                                                                                                                                                                                                                                         |                                                              |                            |                                          |       |
|-------------------------------------------------|----------------------------------------------------------------------------------------------------------------------------------------------|---------------------------------------------------------------------------------------------------------------------------------------------------------------------------------------------------------------------------------------------------------------------------------------------------------|--------------------------------------------------------------|----------------------------|------------------------------------------|-------|
| Benefits and harms<br>(see below)               | Is there important uncertainty or variability in how much patients, researchers, clinicians and stake holders value the main outcomes?       | <ul style="list-style-type: none"> <li>○ Important uncertainty or variability</li> <li>○ Possibly important uncertainty or variability</li> <li>○ <b>Probably no important uncertainty of variability</b></li> <li>○ No important uncertainty of variability</li> <li>○ No known undesirable</li> </ul> | <i>Relative importance of the main outcomes of interest:</i> |                            |                                          | None. |
|                                                 |                                                                                                                                              |                                                                                                                                                                                                                                                                                                         | <b>Outcome</b>                                               | <b>Relative Importance</b> | <b>Certainty of the evidence (GRADE)</b> |       |
|                                                 |                                                                                                                                              |                                                                                                                                                                                                                                                                                                         | Fall frequency                                               | Critical                   | ⊕○○○<br>Very Low                         |       |
|                                                 |                                                                                                                                              |                                                                                                                                                                                                                                                                                                         |                                                              |                            | ○○○○<br>MODERATE                         |       |
|                                                 |                                                                                                                                              |                                                                                                                                                                                                                                                                                                         |                                                              |                            | ○○○○<br>MODERATE                         |       |
|                                                 |                                                                                                                                              |                                                                                                                                                                                                                                                                                                         |                                                              |                            | ○○○○<br>MODERATE                         |       |
|                                                 |                                                                                                                                              |                                                                                                                                                                                                                                                                                                         |                                                              |                            | ○○○○<br>MODERATE                         |       |
|                                                 |                                                                                                                                              |                                                                                                                                                                                                                                                                                                         |                                                              |                            | ○○○○<br>MODERATE                         |       |
|                                                 |                                                                                                                                              |                                                                                                                                                                                                                                                                                                         |                                                              |                            | ○○○○<br>MODERATE                         |       |
|                                                 |                                                                                                                                              |                                                                                                                                                                                                                                                                                                         |                                                              |                            | ○○○○<br>MODERATE                         |       |
| What is the overall certainty of this evidence? | <ul style="list-style-type: none"> <li>○ No studies</li> <li>● <b>Very low</b></li> <li>○ Low</li> <li>○ Moderate</li> <li>○ High</li> </ul> |                                                                                                                                                                                                                                                                                                         |                                                              |                            |                                          |       |

|                                                                                                         |                                                                                                                                                                                                                                                       |                                        |                                  |                |                                                                                                                     |
|---------------------------------------------------------------------------------------------------------|-------------------------------------------------------------------------------------------------------------------------------------------------------------------------------------------------------------------------------------------------------|----------------------------------------|----------------------------------|----------------|---------------------------------------------------------------------------------------------------------------------|
| How substantial are the desirable anticipated effects of the intervention?                              | <ul style="list-style-type: none"> <li>○ Large</li> <li>○ Moderate</li> <li>○ Small</li> <li>○ Trivial</li> <li>○ Varies</li> <li>● <b>Don't know</b></li> </ul>                                                                                      | <i>Summary of findings (GRADE): 2C</i> |                                  |                |                                                                                                                     |
|                                                                                                         |                                                                                                                                                                                                                                                       |                                        | <b>N<sub>o</sub> of patients</b> |                |                                                                                                                     |
| How substantial are the undesirable anticipated effects of the intervention?                            | <ul style="list-style-type: none"> <li>○ Trivial</li> <li>○ Small</li> <li>○ Moderate</li> <li>○ Large</li> <li>○ Varies</li> <li>● <b>Don't know</b></li> </ul>                                                                                      | <b>Outcome</b>                         | <b>Intervention</b>              | <b>Control</b> | <b>Relative / Absolute (95% CI)</b>                                                                                 |
|                                                                                                         |                                                                                                                                                                                                                                                       | Fall frequency                         | 9                                | 10             | multimodal group had a significant ( $Z \geq 2.21$ , $P \leq .02$ ) reduction in 30-day fall frequency <sup>2</sup> |
| Does the balance between desirable effects and undesirable effects favour the option of the comparison? | <ul style="list-style-type: none"> <li>○ Favours the option</li> <li>○ Probably favours the option</li> <li>● <b>Does not favour either</b></li> <li>○ Probably favours the comparison</li> <li>○ Favours the comparison</li> <li>○ Varies</li> </ul> |                                        |                                  |                |                                                                                                                     |
|                                                                                                         |                                                                                                                                                                                                                                                       |                                        |                                  |                |                                                                                                                     |

|                                                                                                    |                                                                                                                                                                                        |                                                                                                                                                                                                                                                                      |  |  |
|----------------------------------------------------------------------------------------------------|----------------------------------------------------------------------------------------------------------------------------------------------------------------------------------------|----------------------------------------------------------------------------------------------------------------------------------------------------------------------------------------------------------------------------------------------------------------------|--|--|
| <p style="writing-mode: vertical-rl; transform: rotate(180deg);"><b>Values and preferences</b></p> | <p>Is there similarity about how much patients, researchers, clinicians and stake holders value the main Outcomes?<br/>Also include adverse effects and burden of the intervention</p> | <ul style="list-style-type: none"> <li>○ No</li> <li>○ Probably no</li> <li>● <b>Uncertain</b></li> <li>○ Probably yes</li> <li>○ Yes</li> <li>○ Varies</li> </ul>                                                                                                   |  |  |
| <p style="writing-mode: vertical-rl; transform: rotate(180deg);"><b>Resources</b></p>              | <p>What is the certainty of the evidence of resources requirements (costs)?</p>                                                                                                        | <ul style="list-style-type: none"> <li>● <b>No studies</b></li> <li>○ Very low</li> <li>○ Low</li> <li>○ Moderate</li> <li>○ High</li> </ul>                                                                                                                         |  |  |
|                                                                                                    | <p>Does the cost effectiveness favour the intervention or the comparison?</p>                                                                                                          | <ul style="list-style-type: none"> <li>● No studies</li> <li>○ Favours the option</li> <li>○ Probably favours the option</li> <li>○ Does not favour either</li> <li>○ Probably favours the comparison</li> <li>○ Favours the comparison</li> <li>○ Varies</li> </ul> |  |  |

|               |                                               |                                                                                                                                                                                                                                                                                                                             |  |  |
|---------------|-----------------------------------------------|-----------------------------------------------------------------------------------------------------------------------------------------------------------------------------------------------------------------------------------------------------------------------------------------------------------------------------|--|--|
| Equity        | What would be the impact on health equity?    | <ul style="list-style-type: none"> <li><input type="radio"/> Increased</li> <li><input type="radio"/> Probably increased</li> <li><input checked="" type="radio"/> <b>Uncertain</b></li> <li><input type="radio"/> Probably reduced</li> <li><input type="radio"/> Reduced</li> <li><input type="radio"/> Varies</li> </ul> |  |  |
| Acceptability | Is the option acceptable to key stakeholders? | <ul style="list-style-type: none"> <li><input type="radio"/> No</li> <li><input type="radio"/> Probably no</li> <li><input checked="" type="radio"/> <b>Uncertain</b></li> <li><input type="radio"/> Probably yes</li> <li><input type="radio"/> Yes</li> <li><input type="radio"/> Varies</li> </ul>                       |  |  |



|             |                                            |                                                                                                                                                                                                                       |  |  |
|-------------|--------------------------------------------|-----------------------------------------------------------------------------------------------------------------------------------------------------------------------------------------------------------------------|--|--|
| Feasibility | Is the intervention feasible to implement? | <input type="radio"/> No<br><input type="radio"/> Probably no<br><input checked="" type="radio"/> <b>Uncertain</b><br><input type="radio"/> Probably yes<br><input type="radio"/> Yes<br><input type="radio"/> Varies |  |  |
|-------------|--------------------------------------------|-----------------------------------------------------------------------------------------------------------------------------------------------------------------------------------------------------------------------|--|--|

**Should \_\_\_ be recommended for older adults to prevent and manage falls?**

| Type of recommendation        | Strong recommendation against the intervention<br><input type="radio"/>                                                                                                                                                 | Weak recommendation against the intervention<br><input type="radio"/> | Conditional recommendation for either the intervention or the comparison<br><input checked="" type="radio"/> | Weak recommendation for the intervention<br><input type="radio"/> | Strong recommendation for the intervention<br><input type="radio"/> |
|-------------------------------|-------------------------------------------------------------------------------------------------------------------------------------------------------------------------------------------------------------------------|-----------------------------------------------------------------------|--------------------------------------------------------------------------------------------------------------|-------------------------------------------------------------------|---------------------------------------------------------------------|
| Recommendation                | Recommendation 1: We conditionally recommend that older adults with Parkinson’s disease should be offered multidomain interventions, based on PD specific assessment and other identified falls risk factors. GRADE: 2B |                                                                       |                                                                                                              |                                                                   |                                                                     |
| Justification                 |                                                                                                                                                                                                                         |                                                                       |                                                                                                              |                                                                   |                                                                     |
| Subgroup considerations       |                                                                                                                                                                                                                         |                                                                       |                                                                                                              |                                                                   |                                                                     |
| Implementation considerations |                                                                                                                                                                                                                         |                                                                       |                                                                                                              |                                                                   |                                                                     |
| Monitoring and evaluation     |                                                                                                                                                                                                                         |                                                                       |                                                                                                              |                                                                   |                                                                     |
| Research Priorities           |                                                                                                                                                                                                                         |                                                                       |                                                                                                              |                                                                   |                                                                     |

## Recommendations for Working Group7: Falls and Parkinson’s disease

**Recommendation 2 (Management and Intervention):** We recommend that older adults with Parkinson’s Disease at an early to mid-stage and with mild or no cognitive impairment should be offered individualized exercise programmes including balance and resistant training exercise. **GRADE: 1A** (see working group 4 for more details on recommendation for exercise)

**Recommendation 3 (Parkinson’s Management and Interventions):** We conditionally recommend offering exercise training, targeting balance and strength to adults with complex phase Parkinson’s Disease if supervised by a physiotherapist or other suitably qualified professional. **GRADE: 1C**

| <b>Population:</b>      | Older adults with Parkinson’s disease | <b>Objective:</b> To reduce the rate and number of falls in people with PD without substantial cognitive impairment.                                        |                   |                                         |
|-------------------------|---------------------------------------|-------------------------------------------------------------------------------------------------------------------------------------------------------------|-------------------|-----------------------------------------|
| <b>Intervention:</b>    | Exercise                              |                                                                                                                                                             |                   |                                         |
| <b>Comparison:</b>      | Standard care                         |                                                                                                                                                             |                   |                                         |
| <b>Main outcomes:</b>   | Falls                                 |                                                                                                                                                             |                   |                                         |
| <b>Setting:</b>         | Any setting                           |                                                                                                                                                             |                   |                                         |
| <b>Perspective:</b>     | PD population                         |                                                                                                                                                             |                   |                                         |
| Decision Domain         |                                       | Judgements                                                                                                                                                  | Research Evidence | Additional Considerations /Explanations |
| Priority of the Problem | Is the problem a priority?            | <ul style="list-style-type: none"> <li>○ No</li> <li>○ Probably no</li> <li>○ Uncertain</li> <li>○ Probably yes</li> <li>● Yes</li> <li>○ Varies</li> </ul> |                   |                                         |

|                                                 |                                                                                                                                              |                                                                                                                                                                                                                                                                                                         |                                                              |                            |                                          |       |
|-------------------------------------------------|----------------------------------------------------------------------------------------------------------------------------------------------|---------------------------------------------------------------------------------------------------------------------------------------------------------------------------------------------------------------------------------------------------------------------------------------------------------|--------------------------------------------------------------|----------------------------|------------------------------------------|-------|
| <b>Benefits and harms</b><br>(see below)        | Is there important uncertainty or variability in how much patients, researchers, clinicians and stake holders value the main outcomes?       | <ul style="list-style-type: none"> <li>○ Important uncertainty or variability</li> <li>○ Possibly important uncertainty or variability</li> <li>● <b>Probably no important uncertainty of variability</b></li> <li>○ No important uncertainty of variability</li> <li>○ No known undesirable</li> </ul> | <i>Relative importance of the main outcomes of interest:</i> |                            |                                          | None. |
|                                                 |                                                                                                                                              |                                                                                                                                                                                                                                                                                                         | <b>Outcome</b>                                               | <b>Relative Importance</b> | <b>Certainty of the evidence (GRADE)</b> |       |
|                                                 |                                                                                                                                              |                                                                                                                                                                                                                                                                                                         | Falls                                                        | Critical                   | ⊕⊕⊕⊕<br>HIGH                             |       |
|                                                 |                                                                                                                                              |                                                                                                                                                                                                                                                                                                         |                                                              |                            | ○○○○<br>MODERATE                         |       |
|                                                 |                                                                                                                                              |                                                                                                                                                                                                                                                                                                         |                                                              |                            | ○○○○<br>MODERATE                         |       |
|                                                 |                                                                                                                                              |                                                                                                                                                                                                                                                                                                         |                                                              |                            | ○○○○<br>MODERATE                         |       |
|                                                 |                                                                                                                                              |                                                                                                                                                                                                                                                                                                         |                                                              |                            | ○○○○<br>MODERATE                         |       |
|                                                 |                                                                                                                                              |                                                                                                                                                                                                                                                                                                         |                                                              |                            | ○○○○<br>MODERATE                         |       |
|                                                 |                                                                                                                                              |                                                                                                                                                                                                                                                                                                         |                                                              |                            | ○○○○<br>MODERATE                         |       |
|                                                 |                                                                                                                                              |                                                                                                                                                                                                                                                                                                         |                                                              |                            | ○○○○<br>MODERATE                         |       |
| What is the overall certainty of this evidence? | <ul style="list-style-type: none"> <li>○ No studies</li> <li>○ Very low</li> <li>○ Low</li> <li>○ Moderate</li> <li>● <b>High</b></li> </ul> |                                                                                                                                                                                                                                                                                                         |                                                              |                            |                                          |       |

|                                                                                                         |                                                                                                                                                                                                                                                       |                                               |                                  |                |                                     |                                                                                                                                                                                                                                                                                           |
|---------------------------------------------------------------------------------------------------------|-------------------------------------------------------------------------------------------------------------------------------------------------------------------------------------------------------------------------------------------------------|-----------------------------------------------|----------------------------------|----------------|-------------------------------------|-------------------------------------------------------------------------------------------------------------------------------------------------------------------------------------------------------------------------------------------------------------------------------------------|
| How substantial are the desirable anticipated effects of the intervention?                              | <ul style="list-style-type: none"> <li>○ Large</li> <li>● <b>Moderate</b></li> <li>○ Small</li> <li>○ Trivial</li> <li>○ Varies</li> <li>○ Don't know</li> </ul>                                                                                      | <b>Summary of findings (GRADE): 1A</b>        |                                  |                |                                     |                                                                                                                                                                                                                                                                                           |
| How substantial are the undesirable anticipated effects of the intervention?                            | <ul style="list-style-type: none"> <li>● <b>Trivial</b></li> <li>○ Small</li> <li>○ Moderate</li> <li>○ Large</li> <li>○ Varies</li> <li>○ Don't know</li> </ul>                                                                                      | <b>Outcome</b>                                | <b>N<sub>o</sub> of patients</b> |                | <b>Effect</b>                       | <p>Freezing of gait (FOG)</p> <p>Teaching FOG prevention strategies:<br/>ES = -0.35 (-0.56, -0.13)</p> <p>Exercise targeting FOG-relevant compensatory systems to enhance the resilience for FOG:<br/>ES = -0.40 (-0.64, -0.16)</p> <p>Exercise on FOG:<br/>ES = -0.46 (-0.76, -0.17)</p> |
| Does the balance between desirable effects and undesirable effects favour the option of the comparison? | <ul style="list-style-type: none"> <li>○ Favours the option</li> <li>● <b>Probably favours the option</b></li> <li>○ Does not favour either</li> <li>○ Probably favours the comparison</li> <li>○ Favours the comparison</li> <li>○ Varies</li> </ul> |                                               | <b>Intervention</b>              | <b>Control</b> | <b>Relative / Absolute (95% CI)</b> |                                                                                                                                                                                                                                                                                           |
|                                                                                                         |                                                                                                                                                                                                                                                       | Rate of falls (exercise)                      |                                  |                | RR = 0.65<br>(0.53 – 0.80)          |                                                                                                                                                                                                                                                                                           |
|                                                                                                         |                                                                                                                                                                                                                                                       | Number of fallers (exercise)                  |                                  |                | RR = 0.90<br>(0.82 – 1.00)          |                                                                                                                                                                                                                                                                                           |
|                                                                                                         |                                                                                                                                                                                                                                                       | Rate of falls (fully supervised exercise)     |                                  |                | RR = 0.56<br>(0.41 – 0.77)          |                                                                                                                                                                                                                                                                                           |
|                                                                                                         |                                                                                                                                                                                                                                                       | Rate of falls (partially supervised exercise) |                                  |                | RR = 0.85<br>(0.75 – 0.97)          |                                                                                                                                                                                                                                                                                           |
|                                                                                                         |                                                                                                                                                                                                                                                       | Number of fallers (higher disease severity)   |                                  |                | RR = 1.19<br>(1.00 – 1.41)          |                                                                                                                                                                                                                                                                                           |

|                                                                                                    |                                                                                                                                                                                        |                                                                                                                                                                                                                                                                             |                                                                  |  |
|----------------------------------------------------------------------------------------------------|----------------------------------------------------------------------------------------------------------------------------------------------------------------------------------------|-----------------------------------------------------------------------------------------------------------------------------------------------------------------------------------------------------------------------------------------------------------------------------|------------------------------------------------------------------|--|
| <p style="writing-mode: vertical-rl; transform: rotate(180deg);"><b>Values and preferences</b></p> | <p>Is there similarity about how much patients, researchers, clinicians and stake holders value the main Outcomes?<br/>Also include adverse effects and burden of the intervention</p> | <ul style="list-style-type: none"> <li>○ No</li> <li>○ Probably no</li> <li>○ Uncertain</li> <li>● <b>Probably yes</b></li> <li>○ Yes</li> <li>○ Varies</li> </ul>                                                                                                          |                                                                  |  |
| <p style="writing-mode: vertical-rl; transform: rotate(180deg);"><b>Resources</b></p>              | <p>What is the certainty of the evidence of resources requirements (costs)?</p>                                                                                                        | <ul style="list-style-type: none"> <li>○ <b>No studies</b></li> <li>○ Very low</li> <li>○ Low</li> <li>○ Moderate</li> <li>○ High</li> </ul>                                                                                                                                | <p>Specific cost of the exercise intervention not mentioned.</p> |  |
|                                                                                                    | <p>Does the cost effectiveness favour the intervention or the comparison?</p>                                                                                                          | <ul style="list-style-type: none"> <li>○ <b>No studies</b></li> <li>○ Favours the option</li> <li>○ Probably favours the option</li> <li>○ Does not favour either</li> <li>○ Probably favours the comparison</li> <li>○ Favours the comparison</li> <li>○ Varies</li> </ul> |                                                                  |  |

|               |                                               |                                                                                                                                                                                                                                                                                                                             |  |  |
|---------------|-----------------------------------------------|-----------------------------------------------------------------------------------------------------------------------------------------------------------------------------------------------------------------------------------------------------------------------------------------------------------------------------|--|--|
| Equity        | What would be the impact on health equity?    | <ul style="list-style-type: none"> <li><input type="radio"/> Increased</li> <li><input type="radio"/> Probably increased</li> <li><input checked="" type="radio"/> <b>Uncertain</b></li> <li><input type="radio"/> Probably reduced</li> <li><input type="radio"/> Reduced</li> <li><input type="radio"/> Varies</li> </ul> |  |  |
| Acceptability | Is the option acceptable to key stakeholders? | <ul style="list-style-type: none"> <li><input type="radio"/> No</li> <li><input type="radio"/> Probably no</li> <li><input type="radio"/> Uncertain</li> <li><input checked="" type="radio"/> <b>Probably yes</b></li> <li><input type="radio"/> Yes</li> <li><input type="radio"/> Varies</li> </ul>                       |  |  |

|             |                                            |                                                                                                                                                                                                                                                                                                       |  |  |
|-------------|--------------------------------------------|-------------------------------------------------------------------------------------------------------------------------------------------------------------------------------------------------------------------------------------------------------------------------------------------------------|--|--|
| Feasibility | Is the intervention feasible to implement? | <ul style="list-style-type: none"> <li><input type="radio"/> No</li> <li><input type="radio"/> Probably no</li> <li><input type="radio"/> Uncertain</li> <li><input checked="" type="radio"/> <b>Probably yes</b></li> <li><input type="radio"/> Yes</li> <li><input type="radio"/> Varies</li> </ul> |  |  |
|-------------|--------------------------------------------|-------------------------------------------------------------------------------------------------------------------------------------------------------------------------------------------------------------------------------------------------------------------------------------------------------|--|--|

**Should exercise be recommended for people with mild to moderate PD without substantial cognitive impairment for falls prevention?**

| Type of recommendation        | Strong recommendation against the intervention<br><input type="radio"/>                                                                                                                                                                                                                                                                                                                                                                                                                                                      | Weak recommendation against the intervention<br><input type="radio"/> | Conditional recommendation for either the intervention or the comparison<br><input type="radio"/> | Weak recommendation for the intervention<br><input type="radio"/> | Strong recommendation for the intervention<br><input checked="" type="radio"/> |
|-------------------------------|------------------------------------------------------------------------------------------------------------------------------------------------------------------------------------------------------------------------------------------------------------------------------------------------------------------------------------------------------------------------------------------------------------------------------------------------------------------------------------------------------------------------------|-----------------------------------------------------------------------|---------------------------------------------------------------------------------------------------|-------------------------------------------------------------------|--------------------------------------------------------------------------------|
| Recommendation                | <p>Recommendation 2: We recommend that older adults with Parkinson’s Disease at an early to mid-stage and with mild or no cognitive impairment should be offered individualised exercise programmes including balance and resistance training exercise. GRADE 1A.</p> <p>Recommendation 3: We conditionally recommend offering exercise training, targeting balance and strength to adults with complex phase Parkinson’s Disease if supervised by a physiotherapist or other suitably qualified professional. GRADE 1C.</p> |                                                                       |                                                                                                   |                                                                   |                                                                                |
| Justification                 |                                                                                                                                                                                                                                                                                                                                                                                                                                                                                                                              |                                                                       |                                                                                                   |                                                                   |                                                                                |
| Subgroup considerations       |                                                                                                                                                                                                                                                                                                                                                                                                                                                                                                                              |                                                                       |                                                                                                   |                                                                   |                                                                                |
| Implementation considerations |                                                                                                                                                                                                                                                                                                                                                                                                                                                                                                                              |                                                                       |                                                                                                   |                                                                   |                                                                                |
| Monitoring and evaluation     |                                                                                                                                                                                                                                                                                                                                                                                                                                                                                                                              |                                                                       |                                                                                                   |                                                                   |                                                                                |
| Research Priorities           |                                                                                                                                                                                                                                                                                                                                                                                                                                                                                                                              |                                                                       |                                                                                                   |                                                                   |                                                                                |

## References

1. Fasano A, Canning CG, Hausdorff JM, Lord S, Rochester L. Falls in Parkinson's disease: A complex and evolving picture. *Mov Disord.* 2017 Nov;32(11):1524-36.
2. Paul SS, Harvey L, Canning CG, Boufous S, Lord SR, Close JC, et al. Fall-related hospitalization in people with Parkinson's disease. *Eur J Neurol.* 2017 Mar;24(3):523-9.
3. Silva de Lima AL, Smits T, Darweesh SKL, Valenti G, Milosevic M, Pijl M, et al. Home-based monitoring of falls using wearable sensors in Parkinson's disease. *Mov Disord.* 2020 Jan;35(1):109-15.
4. Gazibara T, Tepavcevic DK, Svetel M, Tomic A, Stankovic I, Kostic VS, et al. Recurrent falls in Parkinson's disease after one year of follow-up: A nested case-control study. *Arch Gerontol Geriatr.* 2016 Jul-Aug;65:17-24.
5. Gazibara T, Tepavcevic DK, Svetel M, Tomic A, Stankovic I, Kostic VS, et al. Change in fear of falling in Parkinson's disease: a two-year prospective cohort study. *Int Psychogeriatr.* 2019 Jan;31(1):13-20.
6. Pickering RM, Grimbergen YA, Rigney U, Ashburn A, Mazibrada G, Wood B, et al. A meta-analysis of six prospective studies of falling in Parkinson's disease. *Mov Disord.* 2007 Oct 15;22(13):1892-900.
7. Pelicioni PHS, Menant JC, Latt MD, Lord SR. Falls in Parkinson's Disease Subtypes: Risk Factors, Locations and Circumstances. *Int J Environ Res Public Health.* 2019 Jun 23;16(12).
8. Paul SS, Canning CG, Sherrington C, Lord SR, Close JC, Fung VS. Three simple clinical tests to accurately predict falls in people with Parkinson's disease. *Mov Disord.* 2013 May;28(5):655-62.
9. Almeida LRS, Piemonte MEP, Cavalcanti HM, Canning CG, Paul SS. A Self-Reported Clinical Tool Predicts Falls in People with Parkinson's Disease. *Mov Disord Clin Pract.* 2021 Apr;8(3):427-34.
10. Lindholm B, Nilsson MH, Hansson O, Hagell P. External validation of a 3-step falls prediction model in mild Parkinson's disease. *J Neurol.* 2016 Dec;263(12):2462-9.
11. Chung SJ, Lee JJ, Lee PH, Sohn YH. Emerging Concepts of Motor Reserve in Parkinson's Disease. *J Mov Disord.* 2020 Sep;13(3):171-84.
12. Gilat M, Bell PT, Ehgoetz Martens KA, Georgiades MJ, Hall JM, Walton CC, et al. Dopamine depletion impairs gait automaticity by altering cortico-striatal and cerebellar processing in Parkinson's disease. *Neuroimage.* 2017 May 15;152:207-20.
13. Wu T, Zhang J, Hallett M, Feng T, Hou Y, Chan P. Neural correlates underlying micrographia in Parkinson's disease. *Brain.* 2016 Jan;139(Pt 1):144-60.
14. Smulders K, Dale ML, Carlson-Kuhta P, Nutt JG, Horak FB. Pharmacological treatment in Parkinson's disease: Effects on gait. *Parkinsonism Relat Disord.* 2016 Oct;31:3-13.
15. Curtze C, Nutt JG, Carlson-Kuhta P, Mancini M, Horak FB. Levodopa Is a Double-Edged Sword for Balance and Gait in People With Parkinson's Disease. *Mov Disord.* 2015 Sep;30(10):1361-70.
16. Schaafsma JD, Balash Y, Gurevich T, Bartels AL, Hausdorff JM, Giladi N. Characterization of freezing of gait subtypes and the response of each to levodopa in Parkinson's disease. *Eur J Neurol.* 2003 Jul;10(4):391-8.
17. Lucas McKay J, Goldstein FC, Sommerfeld B, Bernhard D, Perez Parra S, Factor SA. Freezing of Gait can persist after an acute levodopa challenge in Parkinson's disease. *NPJ Parkinsons Dis.* 2019;5:25.
18. Latt MD, Lord SR, Morris JG, Fung VS. Clinical and physiological assessments for elucidating falls risk in Parkinson's disease. *Mov Disord.* 2009 Jul 15;24(9):1280-9.
19. Lindholm B, Hagell P, Hansson O, Nilsson MH. Prediction of falls and/or near falls in people with mild Parkinson's disease. *PLoS One.* 2015;10(1):e0117018.
20. Amboni M, Barone P, Hausdorff JM. Cognitive contributions to gait and falls: evidence and implications. *Mov Disord.* 2013 Sep 15;28(11):1520-33.
21. McKay JL, Lang KC, Ting LH, Hackney ME. Impaired set shifting is associated with previous falls in individuals with and without Parkinson's disease. *Gait Posture.* 2018 May;62:220-6.
22. Pelicioni PHS, Menant JC, Henderson EJ, Latt MD, Brodie MA, Lord SR. Mild and marked executive dysfunction and falls in people with Parkinson's disease. *Braz J Phys Ther.* 2021 Jul-Aug;25(4):437-43.
23. Martini DN, Morris R, Madhyastha TM, Grabowski TJ, Oakley J, Hu SC, et al. Relationships Between Sensorimotor Inhibition and Mobility in Older Adults With and Without Parkinson's Disease. *J Gerontol A Biol Sci Med Sci.* 2021 Mar 31;76(4):630-7.
24. Heinzel S, Maechtel M, Hasmann SE, Hobert MA, Heger T, Berg D, et al. Motor dual-tasking deficits predict falls in Parkinson's disease: A prospective study. *Parkinsonism Relat Disord.* 2016 May;26:73-7.



25. Smulders K, Esselink RA, Weiss A, Kessels RP, Geurts AC, Bloem BR. Assessment of dual tasking has no clinical value for fall prediction in Parkinson's disease. *J Neurol*. 2012 Sep;259(9):1840-7.
26. Chivers Seymour K, Pickering R, Rochester L, Roberts HC, Ballinger C, Hulbert S, et al. Multicentre, randomised controlled trial of PDSAFE, a physiotherapist-delivered fall prevention programme for people with Parkinson's. *J Neurol Neurosurg Psychiatry*. 2019 Jul;90(7):774-82.
27. Paul SS, Sherrington C, Canning CG, Fung VS, Close JC, Lord SR. The relative contribution of physical and cognitive fall risk factors in people with Parkinson's disease: a large prospective cohort study. *Neurorehabil Neural Repair*. 2014 Mar-Apr;28(3):282-90.
28. Allen NE, Song J, Paul SS, Sherrington C, Murray SM, O'Rourke SD, et al. Predictors of Adherence to a Falls Prevention Exercise Program for People with Parkinson's Disease. *Mov Disord Clin Pract*. 2015 Dec;2(4):395-401.
29. Sherrington C, Fairhall NJ, Wallbank GK, Tiedemann A, Michaleff ZA, Howard K, et al. Exercise for preventing falls in older people living in the community. *Cochrane Database Syst Rev*. 2019 Jan 31;1:CD012424.
30. Nieuwboer A, Rochester L, Herman T, Vandenberghe W, Emil GE, Thomaes T, et al. Reliability of the new freezing of gait questionnaire: agreement between patients with Parkinson's disease and their carers. *Gait Posture*. 2009 Nov;30(4):459-63.
31. Ashburn A, Fazakarley L, Ballinger C, Pickering R, McLellan LD, Fitton C. A randomised controlled trial of a home based exercise programme to reduce the risk of falling among people with Parkinson's disease. *J Neurol Neurosurg Psychiatry*. 2007 Jul;78(7):678-84.
32. Penko AL, Barkley JE, Rosenfeldt AB, Alberts JL. Multimodal Training Reduces Fall Frequency as Physical Activity Increases in Individuals With Parkinson's Disease. *J Phys Act Health*. 2019 Dec 1;16(12):1085-91.
33. Shen X, Mak MK. Balance and Gait Training With Augmented Feedback Improves Balance Confidence in People With Parkinson's Disease: A Randomized Controlled Trial. *Neurorehabil Neural Repair*. 2014 Jul;28(6):524-35.
34. Morris ME, Menz HB, McGinley JL, Watts JJ, Huxham FE, Murphy AT, et al. A Randomized Controlled Trial to Reduce Falls in People With Parkinson's Disease. *Neurorehabil Neural Repair*. 2015 Sep;29(8):777-85.
35. Wong-Yu IS, Mak MK. Multi-dimensional balance training programme improves balance and gait performance in people with Parkinson's disease: A pragmatic randomized controlled trial with 12-month follow-up. *Parkinsonism Relat Disord*. 2015 Jun;21(6):615-21.
36. Mirelman A, Rochester L, Maidan I, Del Din S, Alcock L, Nieuwhof F, et al. Addition of a non-immersive virtual reality component to treadmill training to reduce fall risk in older adults (V-TIME): a randomised controlled trial. *Lancet*. 2016 Sep 17;388(10050):1170-82.
37. Feng H, Li C, Liu J, Wang L, Ma J, Li G, et al. Virtual Reality Rehabilitation Versus Conventional Physical Therapy for Improving Balance and Gait in Parkinson's Disease Patients: A Randomized Controlled Trial. *Med Sci Monit*. 2019 Jun 5;25:4186-92.
38. Stiers P, Fonteyne A, Wouters H, D'Agostino E, Sunaert S, Lagae L. Hippocampal malrotation in pediatric patients with epilepsy associated with complex prefrontal dysfunction. *Epilepsia*. 2010 Apr;51(4):546-55.
39. Capato TTC, de Vries NM, Int'Hout J, Barbosa ER, Nonnekes J, Bloem BR. Multimodal Balance Training Supported by Rhythmical Auditory Stimuli in Parkinson's Disease: A Randomized Clinical Trial. *J Parkinsons Dis*. 2020;10(1):333-46.
40. King LA, Mancini M, Smulders K, Harker G, Lapidus JA, Ramsey K, et al. Cognitively Challenging Agility Boot Camp Program for Freezing of Gait in Parkinson Disease. *Neurorehabil Neural Repair*. 2020 May;34(5):417-27.
41. Li F, Harmer P, Fitzgerald K, Eckstrom E, Stock R, Galver J, et al. Tai chi and postural stability in patients with Parkinson's disease. *N Engl J Med*. 2012 Feb 9;366(6):511-9.
42. Gao Q, Leung A, Yang Y, Wei Q, Guan M, Jia C, et al. Effects of Tai Chi on balance and fall prevention in Parkinson's disease: a randomized controlled trial. *Clin Rehabil*. 2014 Aug;28(8):748-53.
43. Hulbert S, Chivers-Seymour K, Summers R, Lamb S, Goodwin V, Rochester L, et al. 'PDSAFE' - a multi-dimensional model of falls-rehabilitation for people with Parkinson's. A mixed methods analysis of therapists' delivery and experience. *Physiotherapy*. 2021 Mar;110:77-84.
44. Ashburn A, Pickering R, McIntosh E, Hulbert S, Rochester L, Roberts HC, et al. Exercise- and strategy-based physiotherapy-delivered intervention for preventing repeat falls in people with Parkinson's: the PDSAFE RCT. *Health Technol Assess*. 2019 Jul;23(36):1-150.
45. Hulbert S, Rochester L, Nieuwboer A, Goodwin V, Fitton C, Chivers-Seymour K, et al. "Staying safe" - a narrative review of falls prevention in people with Parkinson's - "PDSAFE". *Disabil Rehabil*. 2019 Oct;41(21):2596-605.

46. Nutt JG, Bloem BR, Giladi N, Hallett M, Horak FB, Nieuwboer A. Freezing of gait: moving forward on a mysterious clinical phenomenon. *Lancet Neurol.* 2011 Aug;10(8):734-44.
47. Bekkers EMJ, Dijkstra BW, Heremans E, Verschueren SMP, Bloem BR, Nieuwboer A. Balancing between the two: Are freezing of gait and postural instability in Parkinson's disease connected? *Neurosci Biobehav Rev.* 2018 Nov;94:113-25.
48. Dijkstra BW, Gilat M, Cofre Lizama LE, Mancini M, Bergmans B, Verschueren SMP, et al. Impaired Weight-Shift Amplitude in People with Parkinson's Disease with Freezing of Gait. *J Parkinsons Dis.* 2021;11(3):1367-80.
49. D'Cruz N, Vervoort G, Fieuids S, Moreau C, Vandenberghe W, Nieuwboer A. Repetitive Motor Control Deficits Most Consistent Predictors of Conversion to Freezing of Gait in Parkinson's Disease: A Prospective Cohort Study. *J Parkinsons Dis.* 2020;10(2):559-71.
50. D'Cruz N, Seuthe J, Ginis P, Hulzinga F, Schlenstedt C, Nieuwboer A. Short-Term Effects of Single-Session Split-Belt Treadmill Training on Dual-Task Performance in Parkinson's Disease and Healthy Elderly. *Front Neurol.* 2020;11:560084.
51. Ehgoetz Martens KA, Lukasik EL, Georgiades MJ, Gilat M, Hall JM, Walton CC, et al. Predicting the onset of freezing of gait: A longitudinal study. *Mov Disord.* 2018 Jan;33(1):128-35.
52. Herman T, Shema-Shiratzky S, Arie L, Giladi N, Hausdorff JM. Depressive symptoms may increase the risk of the future development of freezing of gait in patients with Parkinson's disease: Findings from a 5-year prospective study. *Parkinsonism Relat Disord.* 2019 Mar;60:98-104.
53. Banks SJ, Bayram E, Shan G, LaBelle DR, Bluett B. Non-motor predictors of freezing of gait in Parkinson's disease. *Gait Posture.* 2019 Feb;68:311-6.
54. Delval A, Rambour M, Tard C, Dujardin K, Devos D, Bleuse S, et al. Freezing/festination during motor tasks in early-stage Parkinson's disease: A prospective study. *Mov Disord.* 2016 Dec;31(12):1837-45.
55. D'Cruz N, Seuthe J, De Somer C, Hulzinga F, Ginis P, Schlenstedt C, et al. Dual Task Turning in Place: A Reliable, Valid, and Responsive Outcome Measure of Freezing of Gait. *Mov Disord.* 2022 Feb;37(2):269-78.
56. Del Din S, Galna B, Lord S, Nieuwboer A, Bekkers EMJ, Pelosin E, et al. Falls Risk in Relation to Activity Exposure in High-Risk Older Adults. *J Gerontol A Biol Sci Med Sci.* 2020 May 22;75(6):1198-205.
57. Lofgren N, Conradsson D, Joseph C, Leavy B, Hagstromer M, Franzen E. Factors Associated With Responsiveness to Gait and Balance Training in People With Parkinson Disease. *J Neurol Phys Ther.* 2019 Jan;43(1):42-9.
58. Strouwen C, Molenaar E, Munks L, Broeder S, Ginis P, Bloem BR, et al. Determinants of Dual-Task Training Effect Size in Parkinson Disease: Who Will Benefit Most? *J Neurol Phys Ther.* 2019 Jan;43(1):3-11.
59. Bekkers EMJ, Mirelman A, Alcock L, Rochester L, Nieuwhof F, Bloem BR, et al. Do Patients With Parkinson's Disease With Freezing of Gait Respond Differently Than Those Without to Treadmill Training Augmented by Virtual Reality? *Neurorehabil Neural Repair.* 2020 May;34(5):440-9.
60. Silva-Batista C, Ragothaman A, Mancini M, Carlson-Kuhta P, Harker G, Jung SH, et al. Cortical thickness as predictor of response to exercise in people with Parkinson's disease. *Hum Brain Mapp.* 2021 Jan;42(1):139-53.
61. Jung SH, Hasegawa N, Mancini M, King LA, Carlson-Kuhta P, Smulders K, et al. Effects of the agility boot camp with cognitive challenge (ABC-C) exercise program for Parkinson's disease. *NPJ Parkinsons Dis.* 2020 Nov 2;6(1):31.
62. Paul SS, Dibble LE, Peterson DS. Motor learning in people with Parkinson's disease: Implications for fall prevention across the disease spectrum. *Gait Posture.* 2018 Mar;61:311-9.
63. Karamanidis K, Epro G, McCrum C, Konig M. Improving Trip- and Slip-Resisting Skills in Older People: Perturbation Dose Matters. *Exerc Sport Sci Rev.* 2020 Jan;48(1):40-7.

## Working Group 8: Falls and Technology

### Recommendations for Working Group 8: Technology

**Recommendation 1 (Interventions): We conditionally recommend using telehealth and/or smart home systems (when available) in combination with exercise training as part of falls prevention programmes in the community. GRADE: 2C**

| <b>Population:</b>             | Older adults                                          | <b>Objective:</b> To determine if telehealth helps to prevent or reduce falls, with or without exercise in the community.                                          |                   |                                         |
|--------------------------------|-------------------------------------------------------|--------------------------------------------------------------------------------------------------------------------------------------------------------------------|-------------------|-----------------------------------------|
| <b>Intervention:</b>           | Telehealth and/or smart home system with/out exercise |                                                                                                                                                                    |                   |                                         |
| <b>Comparison:</b>             | Usual care                                            |                                                                                                                                                                    |                   |                                         |
| <b>Main outcomes:</b>          | Falls                                                 |                                                                                                                                                                    |                   |                                         |
| <b>Setting:</b>                | Community-dwelling older adults                       |                                                                                                                                                                    |                   |                                         |
| <b>Perspective:</b>            | Population                                            |                                                                                                                                                                    |                   |                                         |
| Decision Domain                |                                                       | Judgements                                                                                                                                                         | Research Evidence | Additional Considerations /Explanations |
| <b>Priority of the Problem</b> | Is the problem a priority?                            | <ul style="list-style-type: none"> <li>○ No</li> <li>○ Probably no</li> <li>○ Uncertain</li> <li>○ Probably yes</li> <li>● <b>Yes</b></li> <li>○ Varies</li> </ul> |                   |                                         |

|                                                 |                                                                                                                                              |                                                                                                                                                                                                                                                                                                         |                                                              |                            |                                          |       |
|-------------------------------------------------|----------------------------------------------------------------------------------------------------------------------------------------------|---------------------------------------------------------------------------------------------------------------------------------------------------------------------------------------------------------------------------------------------------------------------------------------------------------|--------------------------------------------------------------|----------------------------|------------------------------------------|-------|
| <b>Benefits and harms</b><br>(see below)        | Is there important uncertainty or variability in how much patients, researchers, clinicians and stake holders value the main outcomes?       | <ul style="list-style-type: none"> <li>○ Important uncertainty or variability</li> <li>○ Possibly important uncertainty or variability</li> <li>● <b>Probably no important uncertainty of variability</b></li> <li>○ No important uncertainty of variability</li> <li>○ No known undesirable</li> </ul> | <i>Relative importance of the main outcomes of interest:</i> |                            |                                          | None. |
|                                                 |                                                                                                                                              |                                                                                                                                                                                                                                                                                                         | <b>Outcome</b>                                               | <b>Relative Importance</b> | <b>Certainty of the evidence (GRADE)</b> |       |
|                                                 |                                                                                                                                              |                                                                                                                                                                                                                                                                                                         | Falls                                                        | Critical                   | ⊕⊕○○<br>LOW                              |       |
|                                                 |                                                                                                                                              |                                                                                                                                                                                                                                                                                                         | Fall Risk                                                    | Critical                   | ⊕⊕○○<br>LOW                              |       |
|                                                 |                                                                                                                                              |                                                                                                                                                                                                                                                                                                         | Fall efficacy                                                | Critical                   | ⊕⊕○○<br>LOW                              |       |
|                                                 |                                                                                                                                              |                                                                                                                                                                                                                                                                                                         |                                                              |                            | ○○○○<br>MODERATE                         |       |
|                                                 |                                                                                                                                              |                                                                                                                                                                                                                                                                                                         |                                                              |                            | ○○○○<br>MODERATE                         |       |
|                                                 |                                                                                                                                              |                                                                                                                                                                                                                                                                                                         |                                                              |                            | ○○○○<br>MODERATE                         |       |
|                                                 |                                                                                                                                              |                                                                                                                                                                                                                                                                                                         |                                                              |                            | ○○○○<br>MODERATE                         |       |
|                                                 |                                                                                                                                              |                                                                                                                                                                                                                                                                                                         |                                                              |                            | ○○○○<br>MODERATE                         |       |
| What is the overall certainty of this evidence? | <ul style="list-style-type: none"> <li>○ No studies</li> <li>○ Very low</li> <li>● <b>Low</b></li> <li>○ Moderate</li> <li>○ High</li> </ul> |                                                                                                                                                                                                                                                                                                         |                                                              |                            |                                          |       |

|                                                                                                         |                                                                                                                                                                                                                                                |                                                       |                                  |                |                                                                                                                        |                                                                                                                                                                                                                                                                                                                      |
|---------------------------------------------------------------------------------------------------------|------------------------------------------------------------------------------------------------------------------------------------------------------------------------------------------------------------------------------------------------|-------------------------------------------------------|----------------------------------|----------------|------------------------------------------------------------------------------------------------------------------------|----------------------------------------------------------------------------------------------------------------------------------------------------------------------------------------------------------------------------------------------------------------------------------------------------------------------|
| How substantial are the desirable anticipated effects of the intervention?                              | <ul style="list-style-type: none"> <li>○ Large</li> <li>● <b>Moderate</b></li> <li>○ Small</li> <li>○ Trivial</li> <li>○ Varies</li> <li>○ Don't know</li> </ul>                                                                               | <b>Summary of findings (GRADE): 2C</b>                |                                  |                |                                                                                                                        |                                                                                                                                                                                                                                                                                                                      |
| How substantial are the undesirable anticipated effects of the intervention?                            | <ul style="list-style-type: none"> <li>● <b>Trivial</b></li> <li>○ Small</li> <li>○ Moderate</li> <li>○ Large</li> <li>○ Varies</li> <li>○ Don't know</li> </ul>                                                                               | <b>Outcome</b>                                        | <b>N<sub>o</sub> of patients</b> |                | <b>Effect</b>                                                                                                          | <p>Chan J. et al 2021, “The effectiveness of e-interventions on fall, neuromuscular functions and quality of life in community-dwelling older adults: A systematic review and meta-analysis”.</p> <p><a href="https://doi.org/10.1016/j.ijnurstu.2020.103784">https://doi.org/10.1016/j.ijnurstu.2020.103784</a></p> |
| Does the balance between desirable effects and undesirable effects favour the option of the comparison? | <ul style="list-style-type: none"> <li>● Favours the option</li> <li>○ Probably favours the option</li> <li>○ Does not favour either</li> <li>○ Probably favours the comparison</li> <li>○ Favours the comparison</li> <li>○ Varies</li> </ul> |                                                       | <b>Intervention</b>              | <b>Control</b> | <b>Relative / Absolute (95% CI)</b>                                                                                    |                                                                                                                                                                                                                                                                                                                      |
|                                                                                                         |                                                                                                                                                                                                                                                | Telehealth + exercise                                 | 693                              | 626            | RR: 0.84<br>(0.73 – 0.97)<br>I <sup>2</sup> = 26%                                                                      |                                                                                                                                                                                                                                                                                                                      |
|                                                                                                         |                                                                                                                                                                                                                                                | Smart home system                                     | 145                              | 145            | RR: 0.58<br>(0.44 – 0.77)<br>I <sup>2</sup> = 0%                                                                       |                                                                                                                                                                                                                                                                                                                      |
|                                                                                                         |                                                                                                                                                                                                                                                | Telehealth only                                       | 448                              | 443            | RR: 0.80<br>(0.60 – 1.08)<br>I <sup>2</sup> = 73%                                                                      |                                                                                                                                                                                                                                                                                                                      |
|                                                                                                         |                                                                                                                                                                                                                                                | Total<br>(Telehealth + exercise + smart home systems) | 1286                             | 1214           | RR: 0.79<br>(0.70 – 0.90)<br>Heterogeneity:<br>I <sup>2</sup> = 44%<br>Subgroup differences:<br>I <sup>2</sup> = 63.3% |                                                                                                                                                                                                                                                                                                                      |

|                        |                                                                                                                                                                             |                                                                                                                                                                                                                                                       |                                                                                                                               |                   |
|------------------------|-----------------------------------------------------------------------------------------------------------------------------------------------------------------------------|-------------------------------------------------------------------------------------------------------------------------------------------------------------------------------------------------------------------------------------------------------|-------------------------------------------------------------------------------------------------------------------------------|-------------------|
| Values and preferences | Is there similarity about how much patients, researchers, clinicians and stake holders value the main Outcomes? Also include adverse effects and burden of the intervention | <ul style="list-style-type: none"> <li>○ No</li> <li>○ Probably no</li> <li>○ Uncertain</li> <li>● <b>Probably yes</b></li> <li>○ Yes</li> <li>○ Varies</li> </ul>                                                                                    |                                                                                                                               |                   |
| Resources              | What is the certainty of the evidence of resources requirements (costs)?                                                                                                    | <ul style="list-style-type: none"> <li>○ No studies</li> <li>○ Very low</li> <li>● <b>Low</b></li> <li>○ Moderate</li> <li>○ High</li> </ul>                                                                                                          | E-interventions increase cost effectiveness for patients, after initial set up cost's telehealth is effective in cost-saving. | Chan et al., 2021 |
|                        | Does the cost effectiveness favour the intervention or the comparison?                                                                                                      | <ul style="list-style-type: none"> <li>○ Favours the option</li> <li>● <b>Probably favours the option</b></li> <li>○ Does not favour either</li> <li>○ Probably favours the comparison</li> <li>○ Favours the comparison</li> <li>○ Varies</li> </ul> |                                                                                                                               |                   |

|               |                                               |                                                                                                                                                                                                                                                                                                                             |  |  |
|---------------|-----------------------------------------------|-----------------------------------------------------------------------------------------------------------------------------------------------------------------------------------------------------------------------------------------------------------------------------------------------------------------------------|--|--|
| Equity        | What would be the impact on health equity?    | <ul style="list-style-type: none"> <li><input type="radio"/> Increased</li> <li><input type="radio"/> Probably increased</li> <li><input checked="" type="radio"/> <b>Uncertain</b></li> <li><input type="radio"/> Probably reduced</li> <li><input type="radio"/> Reduced</li> <li><input type="radio"/> Varies</li> </ul> |  |  |
| Acceptability | Is the option acceptable to key stakeholders? | <ul style="list-style-type: none"> <li><input type="radio"/> No</li> <li><input type="radio"/> Probably no</li> <li><input type="radio"/> Uncertain</li> <li><input checked="" type="radio"/> <b>Probably yes</b></li> <li><input type="radio"/> Yes</li> <li><input type="radio"/> Varies</li> </ul>                       |  |  |

|             |                                            |                                                                                                                                                                                                                                                                                                       |  |  |
|-------------|--------------------------------------------|-------------------------------------------------------------------------------------------------------------------------------------------------------------------------------------------------------------------------------------------------------------------------------------------------------|--|--|
| Feasibility | Is the intervention feasible to implement? | <ul style="list-style-type: none"> <li><input type="radio"/> No</li> <li><input type="radio"/> Probably no</li> <li><input type="radio"/> Uncertain</li> <li><input checked="" type="radio"/> <b>Probably yes</b></li> <li><input type="radio"/> Yes</li> <li><input type="radio"/> Varies</li> </ul> |  |  |
|-------------|--------------------------------------------|-------------------------------------------------------------------------------------------------------------------------------------------------------------------------------------------------------------------------------------------------------------------------------------------------------|--|--|

**Should using telehealth and/or smart home systems (when available) alone or in combination with physical exercise to feed falls prevention programs in the community be conditionally recommended for older adults to prevent and manage falls?**

| Type of recommendation        | Strong recommendation against the intervention<br><input type="radio"/>                                                                                                                                               | Weak recommendation against the intervention<br><input type="radio"/> | Conditional recommendation for either the intervention or the comparison<br><input checked="" type="radio"/> | Weak recommendation for the intervention<br><input type="radio"/> | Strong recommendation for the intervention<br><input type="radio"/> |
|-------------------------------|-----------------------------------------------------------------------------------------------------------------------------------------------------------------------------------------------------------------------|-----------------------------------------------------------------------|--------------------------------------------------------------------------------------------------------------|-------------------------------------------------------------------|---------------------------------------------------------------------|
| Recommendation                | Recommendation 1: We conditionally recommend using telehealth and/or smart home systems (when available) in combination with exercise training as part of the falls prevention programmes in the community. GRADE: 2C |                                                                       |                                                                                                              |                                                                   |                                                                     |
| Justification                 |                                                                                                                                                                                                                       |                                                                       |                                                                                                              |                                                                   |                                                                     |
| Subgroup considerations       |                                                                                                                                                                                                                       |                                                                       |                                                                                                              |                                                                   |                                                                     |
| Implementation considerations |                                                                                                                                                                                                                       |                                                                       |                                                                                                              |                                                                   |                                                                     |
| Monitoring and evaluation     |                                                                                                                                                                                                                       |                                                                       |                                                                                                              |                                                                   |                                                                     |
| Research Priorities           |                                                                                                                                                                                                                       |                                                                       |                                                                                                              |                                                                   |                                                                     |



## Recommendations for Working Group 8: Technology for Using Wearable Technology for Fall Prevention and Detection

**Recommendation 2 (Interventions): Current evidence does not support the use of wearables for falls prevention. However, emerging evidence show that when wearables are used in exercise programmes to prevent falls, they may increase participation. GRADE: 2C**

| <b>Population:</b>             | Older adults aged $\geq 60$ years                                    | <b>Objective:</b> With a rise in technology-assisted health monitoring, fall prevention and detection are more feasible and accessible. The use of technology in the clinic for fall risk assessment, interventions, or fall detection is growing. The objective was to review the literature to assess the current evidence for the effectiveness of wearable technology in detecting and preventing falls in older adults. |                                      |                                         |
|--------------------------------|----------------------------------------------------------------------|------------------------------------------------------------------------------------------------------------------------------------------------------------------------------------------------------------------------------------------------------------------------------------------------------------------------------------------------------------------------------------------------------------------------------|--------------------------------------|-----------------------------------------|
| <b>Intervention:</b>           | Any physical exercise intervention that includes wearable technology |                                                                                                                                                                                                                                                                                                                                                                                                                              |                                      |                                         |
| <b>Comparison:</b>             | Intervention without wearable technology                             |                                                                                                                                                                                                                                                                                                                                                                                                                              |                                      |                                         |
| <b>Main outcomes:</b>          | Falls                                                                |                                                                                                                                                                                                                                                                                                                                                                                                                              |                                      |                                         |
| <b>Setting:</b>                | Any setting                                                          |                                                                                                                                                                                                                                                                                                                                                                                                                              |                                      |                                         |
| <b>Perspective:</b>            | Population                                                           |                                                                                                                                                                                                                                                                                                                                                                                                                              |                                      |                                         |
| Decision Domain                |                                                                      | Judgements                                                                                                                                                                                                                                                                                                                                                                                                                   | Research Evidence                    | Additional Considerations /Explanations |
| <b>Priority of the Problem</b> | Is the problem a priority?                                           | <ul style="list-style-type: none"> <li>○ No</li> <li>○ Probably no</li> <li>○ Uncertain</li> <li>○ Probably yes</li> <li>➤ <b>Yes</b></li> <li>○ Varies</li> </ul>                                                                                                                                                                                                                                                           | See 'Overview of the Problem' above. |                                         |

|                                   |                                                                                                                                        |                                                                                                                                                                                                                                                                                                         |                                                              |                            |                                          |                                                                                                                                                                   |
|-----------------------------------|----------------------------------------------------------------------------------------------------------------------------------------|---------------------------------------------------------------------------------------------------------------------------------------------------------------------------------------------------------------------------------------------------------------------------------------------------------|--------------------------------------------------------------|----------------------------|------------------------------------------|-------------------------------------------------------------------------------------------------------------------------------------------------------------------|
| Benefits and harms<br>(see below) | Is there important uncertainty or variability in how much patients, researchers, clinicians and stake holders value the main outcomes? | <ul style="list-style-type: none"> <li>○ Important uncertainty or variability</li> <li>○ Possibly important uncertainty or variability</li> <li>➤ <b>Probably no important uncertainty of variability</b></li> <li>○ No important uncertainty of variability</li> <li>○ No known undesirable</li> </ul> | <b>Relative importance of the main outcomes of interest:</b> |                            |                                          | We only included studies with Falls as the main outcome or also Balance as the main outcome, we do not have sufficient data for the other outcomes in this table. |
|                                   |                                                                                                                                        |                                                                                                                                                                                                                                                                                                         | <b>Outcome</b>                                               | <b>Relative Importance</b> | <b>Certainty of the evidence (GRADE)</b> |                                                                                                                                                                   |
|                                   |                                                                                                                                        |                                                                                                                                                                                                                                                                                                         | Mobility                                                     | Critical                   | N/A                                      |                                                                                                                                                                   |
|                                   |                                                                                                                                        |                                                                                                                                                                                                                                                                                                         | Activities of daily living                                   | Critical                   | N/A                                      |                                                                                                                                                                   |
|                                   |                                                                                                                                        |                                                                                                                                                                                                                                                                                                         | Cognitive function                                           | Critical                   | N/A                                      |                                                                                                                                                                   |
|                                   |                                                                                                                                        |                                                                                                                                                                                                                                                                                                         | Quality of life                                              | Critical                   | N/A                                      |                                                                                                                                                                   |
|                                   |                                                                                                                                        |                                                                                                                                                                                                                                                                                                         | Gait speed                                                   | Critical                   | N/A                                      |                                                                                                                                                                   |
|                                   |                                                                                                                                        |                                                                                                                                                                                                                                                                                                         | <b>Falls</b>                                                 | Critical                   | ⊕⊕⊕○<br>MODERATE                         |                                                                                                                                                                   |
|                                   |                                                                                                                                        |                                                                                                                                                                                                                                                                                                         | Balance                                                      | Critical                   | ⊕⊕○○<br>LOW                              |                                                                                                                                                                   |
|                                   |                                                                                                                                        |                                                                                                                                                                                                                                                                                                         | Health Service Use                                           | Critical                   | N/A                                      |                                                                                                                                                                   |
|                                   | What is the overall certainty of this evidence?                                                                                        | <ul style="list-style-type: none"> <li>○ No studies</li> <li>○ Very low</li> <li>○ Low</li> <li>➤ <b>Moderate</b></li> </ul>                                                                                                                                                                            |                                                              |                            |                                          |                                                                                                                                                                   |

|                                                                                                         |                                                                                                                                                                                                                                                       |                                        |                                     |                                            |                                                                                               |                                                                                       |
|---------------------------------------------------------------------------------------------------------|-------------------------------------------------------------------------------------------------------------------------------------------------------------------------------------------------------------------------------------------------------|----------------------------------------|-------------------------------------|--------------------------------------------|-----------------------------------------------------------------------------------------------|---------------------------------------------------------------------------------------|
| How substantial are the desirable anticipated effects of the intervention?                              | <ul style="list-style-type: none"> <li>○ Large</li> <li>➤ <b>Moderate</b></li> <li>○ Small</li> <li>○ Trivial</li> <li>○ Varies</li> <li>○ Don't know</li> </ul>                                                                                      | <b>Summary of findings (GRADE): 2C</b> |                                     |                                            |                                                                                               |                                                                                       |
| How substantial are the undesirable anticipated effects of the intervention?                            | <ul style="list-style-type: none"> <li>➤ <b>Trivial</b></li> <li>○ Small</li> <li>○ Moderate</li> <li>○ Large</li> <li>○ Varies</li> <li>○ Don't know</li> </ul>                                                                                      | <b>Study</b>                           | <b>Nº of patients</b>               | <b>Outcome</b>                             | <b>Effect</b>                                                                                 | None of the studies listed adverse effects and there is limited information on harms. |
| Does the balance between desirable effects and undesirable effects favour the option of the comparison? | <ul style="list-style-type: none"> <li>➤ <b>Favours the option</b></li> <li>○ Probably favours the option</li> <li>○ Does not favour either</li> <li>○ Probably favours the comparison</li> <li>○ Favours the comparison</li> <li>○ Varies</li> </ul> | Harris et al 2018                      | C = 338<br>I = 339<br>I+nurse = 346 | Fall occurrence – number of falls          | Number of falls (%)<br>Post_C = 22%<br>Post_I = 18%<br>Post_I+nurse = 14%<br><b>p = 0.02*</b> |                                                                                       |
|                                                                                                         |                                                                                                                                                                                                                                                       | Oliveira et al 2019                    | C = 67<br>I = 64                    | Fall occurrence – odds ratio               | Odds ratio<br>OR = 2.0<br>95% CI = 1.1-3.7<br><b>“significant”</b>                            |                                                                                       |
|                                                                                                         |                                                                                                                                                                                                                                                       | Schwenk et al 2014                     | C = 16<br>I = 17                    | Balance outcome – Timed Up and Go (TUG)    | Improvement in TUG<br><b>p = 0.024*</b>                                                       |                                                                                       |
|                                                                                                         |                                                                                                                                                                                                                                                       | Carpinella et al 2017                  | C = 20<br>I = 17                    | Balance outcome – Berg Balance Scale (BBS) | BBS Mean (SD)<br>Post_C = 43.8 (10.9)<br>Post_I = 50.0 (6.2)<br><b>p = 0.047*</b>             |                                                                                       |

|                                                                               |                                                                                                                                                                                           |                                                                                                                                                                                                                                                       |                                                                                                                                              |                            |
|-------------------------------------------------------------------------------|-------------------------------------------------------------------------------------------------------------------------------------------------------------------------------------------|-------------------------------------------------------------------------------------------------------------------------------------------------------------------------------------------------------------------------------------------------------|----------------------------------------------------------------------------------------------------------------------------------------------|----------------------------|
| <p style="text-align: center;"><b>Values and preferences</b></p>              | <p>Is there similarity about how much patients, researchers, clinicians and stake holders value the main Outcomes?</p> <p>Also include adverse effects and burden of the intervention</p> | <ul style="list-style-type: none"> <li>○ No</li> <li>○ Probably no</li> <li>○ Uncertain</li> <li>➤ <b>Probably yes</b></li> <li>○ Yes</li> <li>○ Varies</li> </ul>                                                                                    | <p>Fall reduction is likely a shared value between all stake holders.</p>                                                                    |                            |
|                                                                               | <p style="text-align: center;"><b>Resources</b></p>                                                                                                                                       | <p>What is the certainty of the evidence of resources requirements (costs)?</p>                                                                                                                                                                       | <ul style="list-style-type: none"> <li>➤ <b>No studies</b></li> <li>○ Very low</li> <li>○ Low</li> <li>○ Moderate</li> <li>○ High</li> </ul> | <p>Not enough evidence</p> |
| <p>Does the cost effectiveness favour the intervention or the comparison?</p> |                                                                                                                                                                                           | <ul style="list-style-type: none"> <li>○ Favours the option</li> <li>○ Probably favours the option</li> <li>➤ <b>Does not favour either</b></li> <li>○ Probably favours the comparison</li> <li>○ Favours the comparison</li> <li>○ Varies</li> </ul> | <p>Not enough evidence</p>                                                                                                                   |                            |

|               |                                               |                                                                                                                                                                                          |                                                                                                                                                                                                                        |  |
|---------------|-----------------------------------------------|------------------------------------------------------------------------------------------------------------------------------------------------------------------------------------------|------------------------------------------------------------------------------------------------------------------------------------------------------------------------------------------------------------------------|--|
| Equity        | What would be the impact on health equity?    | <ul style="list-style-type: none"> <li>○ Increased</li> <li>○ Probably increased</li> <li>➤ <b>Uncertain</b></li> <li>○ Probably reduced</li> <li>○ Reduced</li> <li>○ Varies</li> </ul> | Depending on the technology, commercialized products could increase access to interventions by integrating pedometers and exergames. However, certain technology may be more expensive and would not be as accessible. |  |
| Acceptability | Is the option acceptable to key stakeholders? | <ul style="list-style-type: none"> <li>○ No</li> <li>○ Probably no</li> <li>○ Uncertain</li> <li>➤ <b>Probably yes</b></li> <li>○ Yes</li> <li>○ Varies</li> </ul>                       | Simple wearable technology is likely to result in higher adherence and acceptability as it is less burdensome to the participants and the care providers.                                                              |  |

|                                                                                                                                                                                             |                                                                                                                                                                                                                                                                                                                                                                                                                                                                                                  |                                                                                                                                                                                                                                                                                                       |                                                                                                                                                                                                                  |                                                                   |                                                                     |
|---------------------------------------------------------------------------------------------------------------------------------------------------------------------------------------------|--------------------------------------------------------------------------------------------------------------------------------------------------------------------------------------------------------------------------------------------------------------------------------------------------------------------------------------------------------------------------------------------------------------------------------------------------------------------------------------------------|-------------------------------------------------------------------------------------------------------------------------------------------------------------------------------------------------------------------------------------------------------------------------------------------------------|------------------------------------------------------------------------------------------------------------------------------------------------------------------------------------------------------------------|-------------------------------------------------------------------|---------------------------------------------------------------------|
| <b>Feasibility</b>                                                                                                                                                                          | Is the intervention feasible to implement?                                                                                                                                                                                                                                                                                                                                                                                                                                                       | <ul style="list-style-type: none"> <li><input type="radio"/> No</li> <li><input type="radio"/> Probably no</li> <li><input type="radio"/> Uncertain</li> <li><input checked="" type="radio"/> <b>Probably yes</b></li> <li><input type="radio"/> Yes</li> <li><input type="radio"/> Varies</li> </ul> | Depending on the type of wearable technology, implementing the intervention should be as feasible as an intervention without wearable technology. If the technology is more complex, feasibility may be reduced. |                                                                   |                                                                     |
| <b>Should the use of wearable technology to improve fidelity to exercise programs if there are any available be conditionally recommended for older adults to prevent and manage falls?</b> |                                                                                                                                                                                                                                                                                                                                                                                                                                                                                                  |                                                                                                                                                                                                                                                                                                       |                                                                                                                                                                                                                  |                                                                   |                                                                     |
| Type of recommendation                                                                                                                                                                      | Strong recommendation against the intervention<br><input type="radio"/>                                                                                                                                                                                                                                                                                                                                                                                                                          | Weak recommendation against the intervention<br><input type="radio"/>                                                                                                                                                                                                                                 | Conditional recommendation for either the intervention or the comparison<br><input checked="" type="radio"/>                                                                                                     | Weak recommendation for the intervention<br><input type="radio"/> | Strong recommendation for the intervention<br><input type="radio"/> |
| Recommendation                                                                                                                                                                              | Recommendation 2: Current evidence does not support the use of wearables for falls prevention. However, emerging evidence show that when wearables are used in exercise programmes to prevent falls, they may increase participation. GRADE: 2C                                                                                                                                                                                                                                                  |                                                                                                                                                                                                                                                                                                       |                                                                                                                                                                                                                  |                                                                   |                                                                     |
| Justification                                                                                                                                                                               | The evidence for using wearables for falls detection and prevention is available in research settings, however it has not been translated yet to the clinical encounter. Gait and balance assessment via sensors have the potential to be biomarkers for fall risk. These RCTs and cohort studies indicate that technology such as accelerometry is potentially useful to complement conventional clinical assessment, for balance-improvement interventions, and overall, for preventing falls. |                                                                                                                                                                                                                                                                                                       |                                                                                                                                                                                                                  |                                                                   |                                                                     |
| Subgroup considerations                                                                                                                                                                     | None.                                                                                                                                                                                                                                                                                                                                                                                                                                                                                            |                                                                                                                                                                                                                                                                                                       |                                                                                                                                                                                                                  |                                                                   |                                                                     |
| Implementation considerations                                                                                                                                                               | Primary care clinicians should inform their older, community-dwelling adults about physical activity interventions with wearable technology to prevent and manage falls. The preferences and values of older people at risk for falls should be considered when discussing the type of physical exercise intervention                                                                                                                                                                            |                                                                                                                                                                                                                                                                                                       |                                                                                                                                                                                                                  |                                                                   |                                                                     |
| Monitoring and evaluation                                                                                                                                                                   | We do not have enough randomized control trials to draw concrete conclusions on the best way to monitor and evaluate the main outcomes.                                                                                                                                                                                                                                                                                                                                                          |                                                                                                                                                                                                                                                                                                       |                                                                                                                                                                                                                  |                                                                   |                                                                     |

|                     |                                                                                                                                                                                                                                                                                                                                                                                                                                                                                                                                                                                                                                                                                                                                                                                                                                                                                                                                                                                                                                      |
|---------------------|--------------------------------------------------------------------------------------------------------------------------------------------------------------------------------------------------------------------------------------------------------------------------------------------------------------------------------------------------------------------------------------------------------------------------------------------------------------------------------------------------------------------------------------------------------------------------------------------------------------------------------------------------------------------------------------------------------------------------------------------------------------------------------------------------------------------------------------------------------------------------------------------------------------------------------------------------------------------------------------------------------------------------------------|
| Research priorities | More RCTs that use technology to improve fall risk assessment are warranted. A near-future goal could be forming a consensus on identifying objective biomarkers of fall-risk via gait and balance assessment. Additionally, larger, and more diverse open-source fall repositories are encouraged to better enable generalizable machine learning methods as there is likely a problem of over-fitting in the current studies. There is growing literature on the use of sensors to quantify performance in physical function assessments such as timed-up and go tests and gait analysis. Careful consideration should be given to the complexity of the technology; simplicity will likely result in higher adherence. Often laboratory simulations do not map to situations experienced in real-life and hence testing fall-detection should extend to real-world scenarios to improve accuracies and reduce false alarms. It is important to develop algorithms robust for use in the clinic, nursing homes, and the community. |
|---------------------|--------------------------------------------------------------------------------------------------------------------------------------------------------------------------------------------------------------------------------------------------------------------------------------------------------------------------------------------------------------------------------------------------------------------------------------------------------------------------------------------------------------------------------------------------------------------------------------------------------------------------------------------------------------------------------------------------------------------------------------------------------------------------------------------------------------------------------------------------------------------------------------------------------------------------------------------------------------------------------------------------------------------------------------|

### References

1. Chan JKY, Klainin-Yobas P, Chi Y, Gan JKE, Chow G, Wu XV. The effectiveness of e-interventions on fall, neuromuscular functions and quality of life in community-dwelling older adults: A systematic review and meta-analysis. *Int J Nurs Stud.* 2021 Jan;113:103784.
2. Casilari E, Santoyo-Ramón JA, Cano-García JM. UMAFall: A Multisensor Dataset for the Research on Automatic Fall Detection. *Procedia Computer Science.* 2017;110:32-9.
3. Alarifi A, Alwadain A. Killer heuristic optimized convolution neural network-based fall detection with wearable IoT sensor devices. *Measurement.* 2021;167:108258.
4. Bourke AK, Klenk J, Schwickert L, Aminian K, Ihlen EA, Helbostad JL, et al. Temporal and kinematic variables for real-world falls harvested from lumbar sensors in the elderly population. *Annu Int Conf IEEE Eng Med Biol Soc.* 2015;2015:5183-6.
5. Scheurer S, Koch J, Kucera M, Bryn H, Bartschi M, Meerstetter T, et al. Optimization and Technical Validation of the AIDE-MOI Fall Detection Algorithm in a Real-Life Setting with Older Adults. *Sensors (Basel).* 2019 Mar 18;19(6).
6. Saadeh W, Butt SA, Altaf MAB. A Patient-Specific Single Sensor IoT-Based Wearable Fall Prediction and Detection System. *IEEE Trans Neural Syst Rehabil Eng.* 2019 May;27(5):995-1003.
7. Rescio G, Leone A, Siciliano P. Supervised machine learning scheme for electromyography-based pre-fall detection system. *Expert Syst Appl.* 2018;100:95-105.
8. Chaudhuri S, Oudejans D, Thompson HJ, Demiris G. Real-World Accuracy and Use of a Wearable Fall Detection Device by Older Adults. *J Am Geriatr Soc.* 2015 Nov;63(11):2415-6.
9. Marschollek M, Rehwald A, Wolf KH, Gietzelt M, Nemitz G, zu Schwabedissen HM, et al. Sensors vs. experts - a performance comparison of sensor-based fall risk assessment vs. conventional assessment in a sample of geriatric patients. *BMC Med Inform Decis Mak.* 2011 Jun 28;11:48.
10. Levy SS, Thralls KJ, Kviatkovsky SA. Validity and Reliability of a Portable Balance Tracking System, BTrackS, in Older Adults. *J Geriatr Phys Ther.* 2018 Apr/Jun;41(2):102-7.
11. Liang S, Ning Y, Li H, Wang L, Mei Z, Ma Y, et al. Feature Selection and Predictors of Falls with Foot Force Sensors Using KNN-Based Algorithms. *Sensors (Basel).* 2015 Nov 20;15(11):29393-407.
12. Di Rosa M, Hausdorff JM, Stara V, Rossi L, Glynn L, Casey M, et al. Concurrent validation of an index to estimate fall risk in community dwelling seniors through a wireless sensor insole system: A pilot study. *Gait Posture.* 2017 Jun;55:6-11.
13. Weiss A, Herman T, Plotnik M, Brozgol M, Giladi N, Hausdorff JM. An instrumented timed up and go: the added value of an accelerometer for identifying fall risk in idiopathic fallers. *Physiol Meas.* 2011 Dec;32(12):2003-18.
14. Harris T, Kerry SM, Limb ES, Victor CR, Iliffe S, Ussher M, et al. Effect of a Primary Care Walking Intervention with and without Nurse Support on Physical Activity Levels in 45- to 75-Year-Olds: The Pedometer And Consultation Evaluation (PACE-UP) Cluster Randomised Clinical Trial. *PLoS Med.* 2017 Jan;14(1):e1002210.
15. Tran T, Le T, Pham D, Hoang V, Khong V, Tran Q, et al. A multi-modal multi-view dataset for human fall analysis and preliminary investigation on modality. *Proceedings - International Conference on Pattern Recognition.* 2018:1947-52.
16. Reginatto B, Taylor K, Patterson MR, Power D, Komaba Y, Maeda K, et al. Context aware falls risk assessment: A case study comparison. *Annu Int Conf IEEE Eng Med Biol Soc.* 2015;2015:5477-80.

17. Silva J, Sousa I, Cardoso J. Fusion of Clinical, Self-Reported, and Multisensor Data for Predicting Falls. *IEEE J Biomed Heal Informatics*. 2020;24(1):50-6.
18. Pieruccini-Faria F, Montero-Odasso M. Obstacle Negotiation, Gait Variability, and Risk of Falling: Results From the ‘Gait and Brain Study,’. *Journals Gerontol Ser A*. 2019;74(9):1422-8.
19. Lai D, Taylor S, Begg R. Prediction of foot clearance parameters as a precursor to forecasting the risk of tripping and falling. *Hum Mov Sci*. 2012;31(2):271-83.
20. van Schooten K, Pijnappels M, Rispens S, Elders P, Lips P, van Dieen J. Ambulatory Fall-Risk Assessment: Amount and Quality of Daily-Life Gait Predict Falls in Older Adults. *Journals Gerontol Ser A Biol Sci Med*. 2015;70(5):608-15.
21. Rehman RZU, Zhou Y, Del Din S, Alcock L, Hansen C, Guan Y, et al. Gait Analysis with Wearables Can Accurately Classify Fallers from Non-Fallers: A Step toward Better Management of Neurological Disorders. *Sensors (Basel)*. 2020 Dec 7;20(23).
22. Weiss A, Brozgol M, Dorfman M, Herman T, Shema S, Giladi N, et al. Does the evaluation of gait quality during daily life provide insight into fall risk? A novel approach using 3-day accelerometer recordings. *Neurorehabil Neural Repair*. 2013 Oct;27(8):742-52.
23. Aranyavalai T, Jalayondeja C, Jalayondeja W, Pichaiyongwongdee S, Kaewkungwal J, Laskin JJ. Association between walking 5000 step/day and fall incidence over six months in urban community-dwelling older people. *BMC Geriatr*. 2020 Jun 5;20(1):194.
24. Jefferis BJ, Iliffe S, Kendrick D, Kerse N, Trost S, Lennon LT, et al. How are falls and fear of falling associated with objectively measured physical activity in a cohort of community-dwelling older men? *BMC Geriatr*. 2014 Oct 27;14:114.
25. Oliveira JS, Sherrington C, Paul SS, Ramsay E, Chamberlain K, Kirkham C, et al. A combined physical activity and fall prevention intervention improved mobility-related goal attainment but not physical activity in older adults: a randomised trial. *J Physiother*. 2019 Jan;65(1):16-22.
26. Carpinella I, Cattaneo D, Bonora G, Bowman T, Martina L, Montesano A, et al. Wearable Sensor-Based Biofeedback Training for Balance and Gait in Parkinson Disease: A Pilot Randomized Controlled Trial. *Arch Phys Med Rehabil*. 2017 Apr;98(4):622-30 e3.
27. Schwenk M, Grewal GS, Honarvar B, Schwenk S, Mohler J, Khalsa DS, et al. Interactive balance training integrating sensor-based visual feedback of movement performance: a pilot study in older adults. *J Neuroeng Rehabil*. 2014 Dec 13;11:164.
28. Grewal GS, Schwenk M, Lee-Eng J, Parvaneh S, Bharara M, Menzies RA, et al. Sensor-Based Interactive Balance Training with Visual Joint Movement Feedback for Improving Postural Stability in Diabetics with Peripheral Neuropathy: A Randomized Controlled Trial. *Gerontology*. 2015;61(6):567-74.
29. Shany T, Wang K, Liu Y, Lovell NH, Redmond SJ. Review: Are we stumbling in our quest to find the best predictor? Over-optimism in sensor-based models for predicting falls in older adults. *Healthc Technol Lett*. 2015 Aug;2(4):79-88.
30. Jepsen DB, Thomsen K, Hansen S, Jorgensen NR, Masud T, Ryg J. Effect of whole-body vibration exercise in preventing falls and fractures: a systematic review and meta-analysis. *BMJ Open*. 2017 Dec 29;7(12):e018342.



## Working Group 9: Falls in Low- and Middle-Income Countries

### Recommendations for Working Group 9: Falls in Low- and Middle-Income Countries

#### Recommendation 1 (Implementation): Local context needs to be considered when implementing fall prevention programmes in low- and middle-income countries. GRADE: 1B

| <b>Population:</b>             | Older adults $\geq 60$ years of age   | <p><i><b>Objective:</b> Resources may be limited and variable depending on the setting and local context. Falls in older adults is given a low priority in lower-middle-income countries (LMICs) due to competing priorities in terms of ongoing threats of tropical and communicable diseases and the emerging threats of non-communicable disorders<sup>1</sup>. However, adequate evidence is available on the prevalence and risk factors of falls in LMIC to justify a recommendation for opportunistic screening during encounters with the client by relevant agencies providing health and social care (such as, primary health care physicians, community health workers, volunteers) for older adults in LMICs.</i></p> |                                                                                                                                                                                                                                                                                                                                                                                                                                                                                                                                                                                                                             |                                         |
|--------------------------------|---------------------------------------|-----------------------------------------------------------------------------------------------------------------------------------------------------------------------------------------------------------------------------------------------------------------------------------------------------------------------------------------------------------------------------------------------------------------------------------------------------------------------------------------------------------------------------------------------------------------------------------------------------------------------------------------------------------------------------------------------------------------------------------|-----------------------------------------------------------------------------------------------------------------------------------------------------------------------------------------------------------------------------------------------------------------------------------------------------------------------------------------------------------------------------------------------------------------------------------------------------------------------------------------------------------------------------------------------------------------------------------------------------------------------------|-----------------------------------------|
| <b>Intervention:</b>           | Opportunistic screening for fall risk |                                                                                                                                                                                                                                                                                                                                                                                                                                                                                                                                                                                                                                                                                                                                   |                                                                                                                                                                                                                                                                                                                                                                                                                                                                                                                                                                                                                             |                                         |
| <b>Comparison:</b>             | Usual care                            |                                                                                                                                                                                                                                                                                                                                                                                                                                                                                                                                                                                                                                                                                                                                   |                                                                                                                                                                                                                                                                                                                                                                                                                                                                                                                                                                                                                             |                                         |
| <b>Main outcomes:</b>          | Falls                                 |                                                                                                                                                                                                                                                                                                                                                                                                                                                                                                                                                                                                                                                                                                                                   |                                                                                                                                                                                                                                                                                                                                                                                                                                                                                                                                                                                                                             |                                         |
| <b>Setting:</b>                | Community dwelling                    |                                                                                                                                                                                                                                                                                                                                                                                                                                                                                                                                                                                                                                                                                                                                   |                                                                                                                                                                                                                                                                                                                                                                                                                                                                                                                                                                                                                             |                                         |
| <b>Perspective:</b>            | Community dwelling individuals        |                                                                                                                                                                                                                                                                                                                                                                                                                                                                                                                                                                                                                                                                                                                                   |                                                                                                                                                                                                                                                                                                                                                                                                                                                                                                                                                                                                                             |                                         |
| Decision Domain                |                                       | Judgements                                                                                                                                                                                                                                                                                                                                                                                                                                                                                                                                                                                                                                                                                                                        | Research Evidence                                                                                                                                                                                                                                                                                                                                                                                                                                                                                                                                                                                                           | Additional Considerations /Explanations |
| <b>Priority of the Problem</b> | Is the problem a priority?            | <ul style="list-style-type: none"> <li>○ No</li> <li>○ Probably no</li> <li>○ Uncertain</li> <li>○ Probably yes</li> <li>● <b>Yes</b></li> <li>○ Varies</li> </ul>                                                                                                                                                                                                                                                                                                                                                                                                                                                                                                                                                                | <ol style="list-style-type: none"> <li>1. We recommend that in LIMCs community dwelling individuals aged 60 years and over to be screened opportunistically for fall risk during any clinical encounter at least once a year by enquiring about the presence of falls in the past 12 months.</li> <li>2. While we recognize that this is relevant for global practice, this is particularly important in LMIC, as it has yet to be incorporated in healthcare policy. Screening measures need to be brief and simple, taking into account variable levels of training and expertise as well as time constraints.</li> </ol> |                                         |

|                                                 |                                                                                                                                              |                                                                                                                                                                                                                                                                                                  |                                                              |                            |                                          |       |
|-------------------------------------------------|----------------------------------------------------------------------------------------------------------------------------------------------|--------------------------------------------------------------------------------------------------------------------------------------------------------------------------------------------------------------------------------------------------------------------------------------------------|--------------------------------------------------------------|----------------------------|------------------------------------------|-------|
| <b>Benefits and harms</b><br>(see below)        | Is there important uncertainty or variability in how much patients, researchers, clinicians and stake holders value the main outcomes?       | <ul style="list-style-type: none"> <li>○ Important uncertainty or variability</li> <li>○ Possibly important uncertainty or variability</li> <li>● Probably no important uncertainty of variability</li> <li>○ No important uncertainty of variability</li> <li>○ No known undesirable</li> </ul> | <b>Relative importance of the main outcomes of interest:</b> |                            |                                          | None. |
|                                                 |                                                                                                                                              |                                                                                                                                                                                                                                                                                                  | <b>Outcome</b>                                               | <b>Relative Importance</b> | <b>Certainty of the evidence (GRADE)</b> |       |
|                                                 |                                                                                                                                              |                                                                                                                                                                                                                                                                                                  | Number of fallers                                            | Critical                   | ⊕⊕⊕○<br>MODERATE                         |       |
|                                                 |                                                                                                                                              |                                                                                                                                                                                                                                                                                                  | Number of falls                                              | Critical                   | ⊕⊕⊕○<br>MODERATE                         |       |
|                                                 |                                                                                                                                              |                                                                                                                                                                                                                                                                                                  |                                                              |                            | ○○○○<br>MODERATE                         |       |
|                                                 |                                                                                                                                              |                                                                                                                                                                                                                                                                                                  |                                                              |                            | ○○○○<br>MODERATE                         |       |
|                                                 |                                                                                                                                              |                                                                                                                                                                                                                                                                                                  |                                                              |                            | ○○○○<br>MODERATE                         |       |
|                                                 |                                                                                                                                              |                                                                                                                                                                                                                                                                                                  |                                                              |                            | ○○○○<br>MODERATE                         |       |
|                                                 |                                                                                                                                              |                                                                                                                                                                                                                                                                                                  |                                                              |                            | ○○○○<br>MODERATE                         |       |
|                                                 |                                                                                                                                              |                                                                                                                                                                                                                                                                                                  |                                                              |                            | ○○○○<br>MODERATE                         |       |
| What is the overall certainty of this evidence? | <ul style="list-style-type: none"> <li>○ No studies</li> <li>○ Very low</li> <li>○ Low</li> <li>● <b>Moderate</b></li> <li>○ High</li> </ul> |                                                                                                                                                                                                                                                                                                  |                                                              |                            |                                          |       |

|                                                                                                         |                                                                                                                                                                                                                                                       |                                               |                      |                |                                     |
|---------------------------------------------------------------------------------------------------------|-------------------------------------------------------------------------------------------------------------------------------------------------------------------------------------------------------------------------------------------------------|-----------------------------------------------|----------------------|----------------|-------------------------------------|
| How substantial are the desirable anticipated effects of the intervention?                              | <ul style="list-style-type: none"> <li>○ Large</li> <li>● <b>Moderate</b></li> <li>○ Small</li> <li>○ Trivial</li> <li>○ Varies</li> <li>○ Don't know</li> </ul>                                                                                      | <i>Summary of findings (GRADE):</i>           |                      |                |                                     |
|                                                                                                         |                                                                                                                                                                                                                                                       |                                               | <b>№ of patients</b> |                |                                     |
| How substantial are the undesirable anticipated effects of the intervention?                            | <ul style="list-style-type: none"> <li>● <b>Trivial</b></li> <li>○ Small</li> <li>○ Moderate</li> <li>○ Large</li> <li>○ Varies</li> <li>○ Don't know</li> </ul>                                                                                      | <b>Outcome</b>                                | <b>Intervention</b>  | <b>Control</b> | <b>Relative / Absolute (95% CI)</b> |
|                                                                                                         |                                                                                                                                                                                                                                                       | Number of fallers (exercise)                  | 968                  | 954            | OR: 0.43 (0.34-0.53)                |
|                                                                                                         |                                                                                                                                                                                                                                                       | Number of falls (exercise)                    | 262                  | 220            | OR: 0.35 (0.21-0.57)                |
| Does the balance between desirable effects and undesirable effects favour the option of the comparison? | <ul style="list-style-type: none"> <li>○ Favours the option</li> <li>● <b>Probably favours the option</b></li> <li>○ Does not favour either</li> <li>○ Probably favours the comparison</li> <li>○ Favours the comparison</li> <li>○ Varies</li> </ul> | Number of fallers injured (exercise)          | 464                  | 504            | OR: 0.50 (0.35-0.71)                |
|                                                                                                         |                                                                                                                                                                                                                                                       | Number of fallers (exercise using tai chi)    | 189                  | 189            | OR: 0.46 (0.30-0.70)                |
|                                                                                                         |                                                                                                                                                                                                                                                       | Number of falls (exercise using tai chi)      | 113                  | 129            | OR: 0.24 (0.13-0.47)                |
|                                                                                                         |                                                                                                                                                                                                                                                       | Number of fallers (multidomain interventions) | 120                  | 118            | OR: 0.57 (0.23-1.44)                |

|                                                                        |                                                                                                                                                                             |                                                                                                                                                                                                                                                                             |                                                                                                                                              |  |
|------------------------------------------------------------------------|-----------------------------------------------------------------------------------------------------------------------------------------------------------------------------|-----------------------------------------------------------------------------------------------------------------------------------------------------------------------------------------------------------------------------------------------------------------------------|----------------------------------------------------------------------------------------------------------------------------------------------|--|
| Values and preferences                                                 | Is there similarity about how much patients, researchers, clinicians and stake holders value the main Outcomes? Also include adverse effects and burden of the intervention | <ul style="list-style-type: none"> <li>○ No</li> <li>○ Probably no</li> <li>● <b>Uncertain</b></li> <li>○ Probably yes</li> <li>○ Yes</li> <li>○ Varies</li> </ul>                                                                                                          |                                                                                                                                              |  |
|                                                                        | Resources                                                                                                                                                                   | What is the certainty of the evidence of resources requirements (costs)?                                                                                                                                                                                                    | <ul style="list-style-type: none"> <li>● <b>No studies</b></li> <li>○ Very low</li> <li>○ Low</li> <li>○ Moderate</li> <li>○ High</li> </ul> |  |
| Does the cost effectiveness favour the intervention or the comparison? |                                                                                                                                                                             | <ul style="list-style-type: none"> <li>● <b>No studies</b></li> <li>○ Favours the option</li> <li>○ Probably favours the option</li> <li>○ Does not favour either</li> <li>○ Probably favours the comparison</li> <li>○ Favours the comparison</li> <li>○ Varies</li> </ul> |                                                                                                                                              |  |

|               |                                               |                                                                                                                                                                                                                                                                                                                             |  |  |
|---------------|-----------------------------------------------|-----------------------------------------------------------------------------------------------------------------------------------------------------------------------------------------------------------------------------------------------------------------------------------------------------------------------------|--|--|
| Equity        | What would be the impact on health equity?    | <ul style="list-style-type: none"> <li><input type="radio"/> Increased</li> <li><input type="radio"/> Probably increased</li> <li><input checked="" type="radio"/> <b>Uncertain</b></li> <li><input type="radio"/> Probably reduced</li> <li><input type="radio"/> Reduced</li> <li><input type="radio"/> Varies</li> </ul> |  |  |
| Acceptability | Is the option acceptable to key stakeholders? | <ul style="list-style-type: none"> <li><input type="radio"/> No</li> <li><input type="radio"/> Probably no</li> <li><input type="radio"/> Uncertain</li> <li><input checked="" type="radio"/> <b>Probably yes</b></li> <li><input type="radio"/> Yes</li> <li><input type="radio"/> Varies</li> </ul>                       |  |  |

|             |                                            |                                                                                                                                                                                                                                                                                                       |  |  |
|-------------|--------------------------------------------|-------------------------------------------------------------------------------------------------------------------------------------------------------------------------------------------------------------------------------------------------------------------------------------------------------|--|--|
| Feasibility | Is the intervention feasible to implement? | <ul style="list-style-type: none"> <li><input type="radio"/> No</li> <li><input type="radio"/> Probably no</li> <li><input type="radio"/> Uncertain</li> <li><input checked="" type="radio"/> <b>Probably yes</b></li> <li><input type="radio"/> Yes</li> <li><input type="radio"/> Varies</li> </ul> |  |  |
|-------------|--------------------------------------------|-------------------------------------------------------------------------------------------------------------------------------------------------------------------------------------------------------------------------------------------------------------------------------------------------------|--|--|

**Should \_\_\_ be recommended for older adults to prevent and manage falls?**

| Type of recommendation        | Strong recommendation against the intervention<br><input type="radio"/>                                                                                                                                                                                                                                                                                                                                                                                                                                                                                                                                                                                                                                                                                                                                                                                                                                                                                                                                                                                                                                                                                                                                                                                                                                                                                                                             | Weak recommendation against the intervention<br><input type="radio"/> | Conditional recommendation for either the intervention or the comparison<br><input type="radio"/> | Weak recommendation for the intervention<br><input type="radio"/> | Strong recommendation for the intervention<br><input checked="" type="radio"/> |
|-------------------------------|-----------------------------------------------------------------------------------------------------------------------------------------------------------------------------------------------------------------------------------------------------------------------------------------------------------------------------------------------------------------------------------------------------------------------------------------------------------------------------------------------------------------------------------------------------------------------------------------------------------------------------------------------------------------------------------------------------------------------------------------------------------------------------------------------------------------------------------------------------------------------------------------------------------------------------------------------------------------------------------------------------------------------------------------------------------------------------------------------------------------------------------------------------------------------------------------------------------------------------------------------------------------------------------------------------------------------------------------------------------------------------------------------------|-----------------------------------------------------------------------|---------------------------------------------------------------------------------------------------|-------------------------------------------------------------------|--------------------------------------------------------------------------------|
| Recommendation                | Recommendation 1: Local context needs to be considered when implementing fall prevention programmes in low- and middle-income countries. GRADE 1B                                                                                                                                                                                                                                                                                                                                                                                                                                                                                                                                                                                                                                                                                                                                                                                                                                                                                                                                                                                                                                                                                                                                                                                                                                                   |                                                                       |                                                                                                   |                                                                   |                                                                                |
| Justification                 | Opportunistic screening conducted during encounters between older persons and relevant health and social care providers is widely recommended by existing guidelines. The older person may not necessarily present to health services after a fall in LMIC and may prefer to visit the traditional healer [5]. Conversely, some may attend emergency services to address their injuries, but the occurrence of a fall may not be recorded. In those with falls with minor or no injuries which may be recurrent or unexplained, the older person may not seek medical attention. Further, the older person may trivialize the fall, forget the fall or choose to conceal the information due to fear of loss of independent. Detection of the above cases is, therefore, only possible through direct enquiry performed during any encounter with health or social care services. The specific mention of case detection in LMICs should hopefully help support existing falls practitioners within LMICs gain traction towards highlighting this important issue in older populations in LMICs, which now outnumber that of higher income countries, where most published studies have been conducted. Policymakers should no longer deny the need for identification of older adults at risk of falls in LMICs considering a large body of published evidence from LMICs is now in existence [6]. |                                                                       |                                                                                                   |                                                                   |                                                                                |
| Subgroup considerations       | Increased frequency of screening may be justified in women, persons living with disability, lower income groups and in older persons living alone [7-16].                                                                                                                                                                                                                                                                                                                                                                                                                                                                                                                                                                                                                                                                                                                                                                                                                                                                                                                                                                                                                                                                                                                                                                                                                                           |                                                                       |                                                                                                   |                                                                   |                                                                                |
| Implementation considerations | Awareness is of primary concern within LMIC settings. Opportunistic screening in healthcare settings therefore need to utilize simple mechanisms, hence singling out individuals aged 60 years and over to be asked the single question, “have you fallen in the past 12 months” is potentially the most viable strategy. All agencies involved in health and social care provision to older adults should receive mandatory falls prevention education and consider incorporating falls screening in their processes which should also including screening for other commonly under detected age-related issues such as hearing, vision and cognitive problems. The decision who should screen should consider resource availability and hence should not be limited to trained healthcare worker. However, the implementation of opportunistic screening needs to be linked to available services downstream to address those at high risk of falls. The algorithm for subsequent actions for when the older person with a history of falls is identified will need to be tailored to locally available resources and appropriate patient education.                                                                                                                                                                                                                                              |                                                                       |                                                                                                   |                                                                   |                                                                                |

|                           |                                                                                                                                                                                                                                                             |
|---------------------------|-------------------------------------------------------------------------------------------------------------------------------------------------------------------------------------------------------------------------------------------------------------|
| Monitoring and evaluation | The proportion of clients or patients aged 60 years and over utilizing the services provided by the health or social care provider who have been asked whether they have had a fall in the previous year could be used as a monitoring and evaluation tool. |
| Research Priorities       | Intervention studies to determine the value of opportunistic screening and effective implementation strategies for opportunistic screening in various care settings should be considered.                                                                   |

## Recommendations for Working Group 9: Falls in Low- and Middle-Income Countries

**Recommendation 2 (Assessment): We conditionally recommend prioritising assessments of risk factors for cognitive impairment, obesity including sarcopenic obesity, diabetes, lack of appropriate footwear and environmental hazards as falls risk factors in low- and middle-income countries. GRADE 2C.**

| <b>Population:</b>             | Older adults aged $\geq 60$ years                                                      | <b>Objective:</b>                                                                                                                                                                                                                                                                                                                 |                                                                                                                                                                                                                                                                                                                                                                                                                                                                                                                                                                                                                                                                        |                                                                                                                                                                                                                                                                                                                                                                                                                                                     |
|--------------------------------|----------------------------------------------------------------------------------------|-----------------------------------------------------------------------------------------------------------------------------------------------------------------------------------------------------------------------------------------------------------------------------------------------------------------------------------|------------------------------------------------------------------------------------------------------------------------------------------------------------------------------------------------------------------------------------------------------------------------------------------------------------------------------------------------------------------------------------------------------------------------------------------------------------------------------------------------------------------------------------------------------------------------------------------------------------------------------------------------------------------------|-----------------------------------------------------------------------------------------------------------------------------------------------------------------------------------------------------------------------------------------------------------------------------------------------------------------------------------------------------------------------------------------------------------------------------------------------------|
| <b>Intervention:</b>           | Evaluation of nutritional status (including obesity), diabetes, cognition and footwear | 1. We recommend addressing nutritional risk factors for falls (including deficiencies), obesity (including adiposity, excess body fat and sarcopenic obesity) and diabetes as important risk factors for older adults residing in LMICs.                                                                                          |                                                                                                                                                                                                                                                                                                                                                                                                                                                                                                                                                                                                                                                                        |                                                                                                                                                                                                                                                                                                                                                                                                                                                     |
| <b>Comparison:</b>             | N/A                                                                                    | 2. We also recommend critical attention to cognitive risk factors for falls in older adults within LMICs, as with lower educational attainment within older adults in developing countries the number of persons living with dementia in these settings are expected to increase exponentially alongside rapid population ageing. |                                                                                                                                                                                                                                                                                                                                                                                                                                                                                                                                                                                                                                                                        |                                                                                                                                                                                                                                                                                                                                                                                                                                                     |
| <b>Main outcomes:</b>          | Obesity, Malnutrition, diabetes, inappropriate or absence of footwear                  | 3. And finally, we recommend addressing poor footwear including bare footedness in older adults at risk of falls residing in LMICs as the lack of appropriate footwear is far more common in resource poor settings.                                                                                                              |                                                                                                                                                                                                                                                                                                                                                                                                                                                                                                                                                                                                                                                                        |                                                                                                                                                                                                                                                                                                                                                                                                                                                     |
| <b>Setting:</b>                | LMIC                                                                                   |                                                                                                                                                                                                                                                                                                                                   |                                                                                                                                                                                                                                                                                                                                                                                                                                                                                                                                                                                                                                                                        |                                                                                                                                                                                                                                                                                                                                                                                                                                                     |
| <b>Perspective:</b>            | Population                                                                             |                                                                                                                                                                                                                                                                                                                                   |                                                                                                                                                                                                                                                                                                                                                                                                                                                                                                                                                                                                                                                                        |                                                                                                                                                                                                                                                                                                                                                                                                                                                     |
| Decision Domain                |                                                                                        | Judgements                                                                                                                                                                                                                                                                                                                        | Research Evidence                                                                                                                                                                                                                                                                                                                                                                                                                                                                                                                                                                                                                                                      | Additional Considerations /Explanations                                                                                                                                                                                                                                                                                                                                                                                                             |
| <b>Priority of the Problem</b> | Is the problem a priority?                                                             | <ul style="list-style-type: none"> <li>○ No</li> <li>○ Probably no</li> <li>○ Uncertain</li> <li>● <b>Probably yes</b></li> <li>○ Yes</li> <li>○ Varies</li> </ul>                                                                                                                                                                | While available published evidence linking body composition, diabetes cognition and foot coverings with falls in LMICs remains limited, emerging evidence from LMICs have been consistent in suggesting that diabetes and obesity are associated with falls. Several published studies have address cognitive impairment, but with lower educational attainment considered the strongest risk factor for cognitive impairment and dementia, cognition likely to be an important and prominent risk factor for falls which should not be ignored. There is, also, weak evidence on increased risk of falls with inappropriate footwear which includes absence of shoes. | While footwear and cognition are also important in the developed world, cognition issues are greater with near absence of dementia diagnosis and lower education attainment being universal issues. Footwear issues also differ, as while heels are probably the main issue in developed countries, in developing countries its total absence of footwear, or inappropriate footwear such as flip-flops, broken or wrong sizes that are the issues. |



|                                          |                                                                                                                                        |                                                                                                                                                                                                                                                                                                                                                   |                                                              |                            |                                          |       |
|------------------------------------------|----------------------------------------------------------------------------------------------------------------------------------------|---------------------------------------------------------------------------------------------------------------------------------------------------------------------------------------------------------------------------------------------------------------------------------------------------------------------------------------------------|--------------------------------------------------------------|----------------------------|------------------------------------------|-------|
| <b>Benefits and harms</b><br>(see below) | Is there important uncertainty or variability in how much patients, researchers, clinicians and stake holders value the main outcomes? | <ul style="list-style-type: none"> <li>• <b>Important uncertainty or variability</b> <ul style="list-style-type: none"> <li>○ Possibly important uncertainty or variability</li> <li>○ Probably no important uncertainty of variability</li> <li>○ No important uncertainty of variability</li> <li>○ No known undesirable</li> </ul> </li> </ul> | <i>Relative importance of the main outcomes of interest:</i> |                            |                                          | None. |
|                                          |                                                                                                                                        |                                                                                                                                                                                                                                                                                                                                                   | <b>Outcome</b>                                               | <b>Relative Importance</b> | <b>Certainty of the evidence (GRADE)</b> |       |
|                                          |                                                                                                                                        |                                                                                                                                                                                                                                                                                                                                                   | Obesity                                                      | High                       | ⊕⊕○○<br>MODERATE                         |       |
|                                          |                                                                                                                                        |                                                                                                                                                                                                                                                                                                                                                   | Nutritional Status                                           | Moderate                   | ⊕○○○<br>LOW                              |       |
|                                          |                                                                                                                                        |                                                                                                                                                                                                                                                                                                                                                   | Diabetes                                                     | Moderate                   | ⊕⊕○○<br>MODERATE                         |       |
|                                          |                                                                                                                                        |                                                                                                                                                                                                                                                                                                                                                   | Footwear                                                     | Moderate                   | ⊕○○○<br>LOW                              |       |
|                                          |                                                                                                                                        |                                                                                                                                                                                                                                                                                                                                                   | Cognition                                                    | High                       | ⊕○○○<br>LOW                              |       |
|                                          |                                                                                                                                        |                                                                                                                                                                                                                                                                                                                                                   |                                                              |                            | ○○○○<br>MODERATE                         |       |
|                                          |                                                                                                                                        |                                                                                                                                                                                                                                                                                                                                                   |                                                              |                            | ○○○○<br>MODERATE                         |       |
|                                          | What is the overall certainty of this evidence?                                                                                        | <ul style="list-style-type: none"> <li>○ No studies</li> <li>○ Very low</li> <li>• <b>Low</b></li> <li>○ Moderate</li> <li>○ High</li> </ul>                                                                                                                                                                                                      |                                                              |                            |                                          |       |

|                                                                                                         |                                                                                                                                                                                                                                                       |                                     |                                  |                |                                       |                                     |
|---------------------------------------------------------------------------------------------------------|-------------------------------------------------------------------------------------------------------------------------------------------------------------------------------------------------------------------------------------------------------|-------------------------------------|----------------------------------|----------------|---------------------------------------|-------------------------------------|
| How substantial are the desirable anticipated effects of the intervention?                              | <ul style="list-style-type: none"> <li>○ Large</li> <li>● <b>Moderate</b></li> <li>○ Small</li> <li>○ Trivial</li> <li>○ Varies</li> <li>○ Don't know</li> </ul>                                                                                      | <b>Summary of findings (GRADE):</b> |                                  |                | Please provide supporting information |                                     |
|                                                                                                         |                                                                                                                                                                                                                                                       | <b>Outcome</b>                      | <b>N<sup>o</sup> of patients</b> |                |                                       | <b>Effect</b>                       |
|                                                                                                         |                                                                                                                                                                                                                                                       |                                     | <b>Intervention</b>              | <b>Control</b> |                                       | <b>Relative / Absolute (95% CI)</b> |
|                                                                                                         |                                                                                                                                                                                                                                                       |                                     |                                  |                |                                       |                                     |
| How substantial are the undesirable anticipated effects of the intervention?                            | <ul style="list-style-type: none"> <li>○ Trivial</li> <li>○ Small</li> <li>○ Moderate</li> <li>○ Large</li> <li>● <b>Varies</b></li> <li>○ Don't know</li> </ul>                                                                                      |                                     |                                  |                |                                       |                                     |
|                                                                                                         |                                                                                                                                                                                                                                                       |                                     |                                  |                |                                       |                                     |
|                                                                                                         |                                                                                                                                                                                                                                                       |                                     |                                  |                |                                       |                                     |
| Does the balance between desirable effects and undesirable effects favour the option of the comparison? | <ul style="list-style-type: none"> <li>○ Favours the option</li> <li>● <b>Probably favours the option</b></li> <li>○ Does not favour either</li> <li>○ Probably favours the comparison</li> <li>○ Favours the comparison</li> <li>○ Varies</li> </ul> |                                     |                                  |                |                                       |                                     |
|                                                                                                         |                                                                                                                                                                                                                                                       |                                     |                                  |                |                                       |                                     |
|                                                                                                         |                                                                                                                                                                                                                                                       |                                     |                                  |                |                                       |                                     |

|                                                                        |                                                                                                                                                                             |                                                                                                                                                                                                                                                                                                                                                           |                                                                                                                                                                                                                              |                                       |
|------------------------------------------------------------------------|-----------------------------------------------------------------------------------------------------------------------------------------------------------------------------|-----------------------------------------------------------------------------------------------------------------------------------------------------------------------------------------------------------------------------------------------------------------------------------------------------------------------------------------------------------|------------------------------------------------------------------------------------------------------------------------------------------------------------------------------------------------------------------------------|---------------------------------------|
| Values and preferences                                                 | Is there similarity about how much patients, researchers, clinicians and stake holders value the main Outcomes? Also include adverse effects and burden of the intervention | <ul style="list-style-type: none"> <li><input type="radio"/> No</li> <li><input type="radio"/> Probably no</li> <li><input type="radio"/> Uncertain</li> <li>• <b>Uncertain</b></li> <li><input type="radio"/> Probably yes</li> <li><input type="radio"/> Yes</li> <li><input type="radio"/> Varies</li> </ul>                                           | Please provide supporting information                                                                                                                                                                                        |                                       |
|                                                                        | Resources                                                                                                                                                                   | What is the certainty of the evidence of resources requirements (costs)?                                                                                                                                                                                                                                                                                  | <ul style="list-style-type: none"> <li><input type="radio"/> No studies</li> <li><input type="radio"/> Very low</li> <li>• <b>Low</b></li> <li><input type="radio"/> Moderate</li> <li><input type="radio"/> High</li> </ul> | Please provide supporting information |
| Does the cost effectiveness favour the intervention or the comparison? |                                                                                                                                                                             | <ul style="list-style-type: none"> <li><input type="radio"/> Favours the option</li> <li><input type="radio"/> Probably favours the option</li> <li><input type="radio"/> Does not favour either</li> <li><input type="radio"/> Probably favours the comparison</li> <li><input type="radio"/> Favours the comparison</li> <li>• <b>Varies</b></li> </ul> | Please provide supporting information                                                                                                                                                                                        |                                       |

|               |                                               |                                                                                                                                                                                                                                                                                                                             |                                       |  |
|---------------|-----------------------------------------------|-----------------------------------------------------------------------------------------------------------------------------------------------------------------------------------------------------------------------------------------------------------------------------------------------------------------------------|---------------------------------------|--|
| Equity        | What would be the impact on health equity?    | <ul style="list-style-type: none"> <li><input type="radio"/> Increased</li> <li><input checked="" type="radio"/> <b>Probably increased</b></li> <li><input type="radio"/> Uncertain</li> <li><input type="radio"/> Probably reduced</li> <li><input type="radio"/> Reduced</li> <li><input type="radio"/> Varies</li> </ul> | Please provide supporting information |  |
| Acceptability | Is the option acceptable to key stakeholders? | <ul style="list-style-type: none"> <li><input type="radio"/> No</li> <li><input type="radio"/> Probably no</li> <li><input type="radio"/> Uncertain</li> <li><input checked="" type="radio"/> <b>Probably yes</b></li> <li><input type="radio"/> Yes</li> <li><input type="radio"/> Varies</li> </ul>                       | Please provide supporting information |  |

|             |                                            |                                                                                                                                                                                                                                                                                                       |                                       |  |
|-------------|--------------------------------------------|-------------------------------------------------------------------------------------------------------------------------------------------------------------------------------------------------------------------------------------------------------------------------------------------------------|---------------------------------------|--|
| Feasibility | Is the intervention feasible to implement? | <ul style="list-style-type: none"> <li><input type="radio"/> No</li> <li><input type="radio"/> Probably no</li> <li><input type="radio"/> Uncertain</li> <li><input checked="" type="radio"/> <b>Probably yes</b></li> <li><input type="radio"/> Yes</li> <li><input type="radio"/> Varies</li> </ul> | Please provide supporting information |  |
|             |                                            |                                                                                                                                                                                                                                                                                                       |                                       |  |

**Should assessment of nutritional status, diabetes, cognition and footwear be recommended for older adults in LMIC to prevent and manage falls?**

| Type of recommendation        | Strong recommendation against the intervention<br><input type="radio"/>                                                                                                                                                                                                                                                                                                                                                                                                                                                                                                                                                                                                                                                                                                                                                                                                                                                                                                                                                                                                                                                                                                                                                                                                 | Weak recommendation against the intervention<br><input type="radio"/> | Conditional recommendation for either the intervention or the comparison<br><input type="radio"/> | <b>Weak recommendation for the intervention</b><br><input checked="" type="radio"/> | Strong recommendation for the intervention<br><input type="radio"/> |
|-------------------------------|-------------------------------------------------------------------------------------------------------------------------------------------------------------------------------------------------------------------------------------------------------------------------------------------------------------------------------------------------------------------------------------------------------------------------------------------------------------------------------------------------------------------------------------------------------------------------------------------------------------------------------------------------------------------------------------------------------------------------------------------------------------------------------------------------------------------------------------------------------------------------------------------------------------------------------------------------------------------------------------------------------------------------------------------------------------------------------------------------------------------------------------------------------------------------------------------------------------------------------------------------------------------------|-----------------------------------------------------------------------|---------------------------------------------------------------------------------------------------|-------------------------------------------------------------------------------------|---------------------------------------------------------------------|
| Recommendation                | Recommendation 2: We conditionally recommend prioritising assessments of risk factors for cognitive impairment, obesity including sarcopenic obesity, diabetes, lack of appropriate footwear and environmental hazards as falls risk factors in low- and middle-income countries. GRADE 2C.                                                                                                                                                                                                                                                                                                                                                                                                                                                                                                                                                                                                                                                                                                                                                                                                                                                                                                                                                                             |                                                                       |                                                                                                   |                                                                                     |                                                                     |
| Justification                 | While numerous risk factors for falls found in available epidemiological studies from LMICs have been found to mirror that previously established in higher income nations where most of the available evidence on falls risk factors have been studied, emerging evidence have, however, found unique, culturally-specific risk factors for LMIC. The obesity epidemic is has now moved to many middle-income countries which have outpaced and outperformed higher income nations in obesity rates. While the relationship between obesity and falls in higher income countries have been contentious, the evidence linking obesity and falls in LMIC is sparse but far more consistent. It is likely that sarcopenic obesity is far more common in LMIC. Similarly, cognitive impairment is associated with lower educational attainment, and older residents in LMICs are likely to have lower educational attainment. Those in LMICs are also less likely to have access to safe and appropriate footwear with bare footedness, mostly indoors but sometimes outdoors, commonplace in countries with tropical climates.                                                                                                                                            |                                                                       |                                                                                                   |                                                                                     |                                                                     |
| Subgroup considerations       | Falls in dementia populations in LMICs will require further evaluation, but it is expected that a sizeable proportion of those presenting with falls could have previously undiagnosed dementia. Body size and obesity prevalence is geographically specific with Western Pacific and Middle Eastern nations reporting far higher prevalence of obesity. Population specific nutritional and lifestyle interventions could be considered in these settings, which could have important implications on fall prevention in these settings. While footwear and cognition are also important in the developed world, cognition issues are greater with near absence of dementia diagnosis and lower education attainment being universal issues. Footwear issues also differ, as while heels are probably the main issue in developed countries, in developing countries its total absence of footwear, or inappropriate footwear such as flip-flops, broken or wrong sizes that are the issues. Further, walking barefoot and use of flip-flops are issues specific to countries with tropical climates, therefore, the development of strategies to educate as well as ensure availability of safe, affordable footwear would be specific to LMICs with warmer climates. |                                                                       |                                                                                                   |                                                                                     |                                                                     |
| Implementation considerations | Within LMICs, resources would be limited to ensure availability of nutrient rich food with lower caloric value, safe and appropriate footwear, exercise and educational programs and appropriately trained personnel to screen for and manage those with cognitive decline. Low-cost innovations are therefore required to ensure that these neglected areas in falls prevention are appropriately addressed.                                                                                                                                                                                                                                                                                                                                                                                                                                                                                                                                                                                                                                                                                                                                                                                                                                                           |                                                                       |                                                                                                   |                                                                                     |                                                                     |

|                           |                                                                                                                                                                                                                                                                                                                                                               |
|---------------------------|---------------------------------------------------------------------------------------------------------------------------------------------------------------------------------------------------------------------------------------------------------------------------------------------------------------------------------------------------------------|
| Monitoring and evaluation | The proportion of individuals with falls who also had nutritional status, obesity markers (BMI, waist circumference), diabetes cognitive assessment and footwear evaluation. Individuals living with obesity and cognitive impairment should also be screened for falls occurrence.                                                                           |
| Research Priorities       | Research into falls in individuals living with obesity, diabetes, and cognitive impairment in LMIC should be prioritized. With both conditions likely to become increasing prominent alongside rapid population ageing in LMICs. As footwear issues are unique within LMICs, with clear geographical variation, footwear research should also be prioritized. |

## Recommendations for Working Group 9 - Falls in Low- and Middle-Income Countries

**Recommendation 3 (Assessment): We conditionally recommend that clinicians and caregivers in low- and middle-income countries settings should preferably use validated tools that are freely available in their country of residence to assess mobility and fall risk. GRADE: E.**

| <b>Population:</b>      | Individuals aged 60 years and over in LMIC with at least one fall in the past 12 years | <b>Objective:</b><br><i>Falls are commonly the result of interacting risks, and one leading risk factor is gait and balance impairment. Gait and balance assessment has been recommended in older people with risk of falls.</i>  |                                                                                                                                                                                                                                                                                                                                                                                                                                                                                                                       |                                                                                                                                                                                                     |
|-------------------------|----------------------------------------------------------------------------------------|-----------------------------------------------------------------------------------------------------------------------------------------------------------------------------------------------------------------------------------|-----------------------------------------------------------------------------------------------------------------------------------------------------------------------------------------------------------------------------------------------------------------------------------------------------------------------------------------------------------------------------------------------------------------------------------------------------------------------------------------------------------------------|-----------------------------------------------------------------------------------------------------------------------------------------------------------------------------------------------------|
| <b>Intervention:</b>    | Gait and balance assessment                                                            | <i>The objective was to review the literature regarding the best physical assessment tool for gait and balance impairment among older adults, performed as part of a multifactorial falls risk assessment for falls in LMICs.</i> |                                                                                                                                                                                                                                                                                                                                                                                                                                                                                                                       |                                                                                                                                                                                                     |
| <b>Comparison:</b>      | N/A                                                                                    |                                                                                                                                                                                                                                   |                                                                                                                                                                                                                                                                                                                                                                                                                                                                                                                       |                                                                                                                                                                                                     |
| <b>Main outcomes:</b>   | Impaired Gait and Balance                                                              |                                                                                                                                                                                                                                   |                                                                                                                                                                                                                                                                                                                                                                                                                                                                                                                       |                                                                                                                                                                                                     |
| <b>Setting:</b>         | LMIC                                                                                   |                                                                                                                                                                                                                                   |                                                                                                                                                                                                                                                                                                                                                                                                                                                                                                                       |                                                                                                                                                                                                     |
| <b>Perspective:</b>     | Population                                                                             |                                                                                                                                                                                                                                   |                                                                                                                                                                                                                                                                                                                                                                                                                                                                                                                       |                                                                                                                                                                                                     |
| Decision Domain         |                                                                                        | Judgements                                                                                                                                                                                                                        | Research Evidence                                                                                                                                                                                                                                                                                                                                                                                                                                                                                                     | Additional Considerations /Explanations                                                                                                                                                             |
| Priority of the Problem | Is the problem a priority?                                                             | <ul style="list-style-type: none"> <li>○ No</li> <li>○ Probably no</li> <li>○ Uncertain</li> <li>● <b>Probably yes</b></li> <li>○ Yes</li> <li>○ Varies</li> </ul>                                                                | <p>Earlier studies showed there is no robust single physical assessment tool that can be used to perform a perfect risk assessment for gait and balance in relation to falls risk. Moreover, muscle strength appeared as a stronger risk factor and predictor compared to balance in younger older persons in LMI. In a recent review, gait speed was found to be a sensitive tool in the higher-income countries—and given its low cost and ease of administration—it may be a useful tool to implement in LMIC.</p> | <p>Tools validated in developed nations such as gait speed may not work in low- and middle-income countries. Cramped, over-crowded conditions with lack of level ground may be a major barrier.</p> |
|                         |                                                                                        |                                                                                                                                                                                                                                   |                                                                                                                                                                                                                                                                                                                                                                                                                                                                                                                       |                                                                                                                                                                                                     |

|                                                 |                                                                                                                                              |                                                                                                                                                                                                                                                                                                                                                   |                                                              |                            |                                          |       |
|-------------------------------------------------|----------------------------------------------------------------------------------------------------------------------------------------------|---------------------------------------------------------------------------------------------------------------------------------------------------------------------------------------------------------------------------------------------------------------------------------------------------------------------------------------------------|--------------------------------------------------------------|----------------------------|------------------------------------------|-------|
| Benefits and harms<br>(see below)               | Is there important uncertainty or variability in how much patients, researchers, clinicians and stake holders value the main outcomes?       | <ul style="list-style-type: none"> <li>• <b>Important uncertainty or variability</b> <ul style="list-style-type: none"> <li>○ Possibly important uncertainty or variability</li> <li>○ Probably no important uncertainty of variability</li> <li>○ No important uncertainty of variability</li> <li>○ No known undesirable</li> </ul> </li> </ul> | <i>Relative importance of the main outcomes of interest:</i> |                            |                                          | None. |
|                                                 |                                                                                                                                              |                                                                                                                                                                                                                                                                                                                                                   | <b>Outcome</b>                                               | <b>Relative Importance</b> | <b>Certainty of the evidence (GRADE)</b> |       |
|                                                 |                                                                                                                                              |                                                                                                                                                                                                                                                                                                                                                   | Gait impairment                                              | high                       | ⊕⊕⊕○<br>MODERATE                         |       |
|                                                 |                                                                                                                                              |                                                                                                                                                                                                                                                                                                                                                   | Balance impairment                                           | high                       | ⊕⊕⊕○<br>MODERATE                         |       |
|                                                 |                                                                                                                                              |                                                                                                                                                                                                                                                                                                                                                   |                                                              |                            |                                          |       |
|                                                 |                                                                                                                                              |                                                                                                                                                                                                                                                                                                                                                   |                                                              |                            |                                          |       |
|                                                 |                                                                                                                                              |                                                                                                                                                                                                                                                                                                                                                   |                                                              |                            |                                          |       |
|                                                 |                                                                                                                                              |                                                                                                                                                                                                                                                                                                                                                   |                                                              |                            |                                          |       |
|                                                 |                                                                                                                                              |                                                                                                                                                                                                                                                                                                                                                   |                                                              |                            |                                          |       |
|                                                 |                                                                                                                                              |                                                                                                                                                                                                                                                                                                                                                   |                                                              |                            |                                          |       |
| What is the overall certainty of this evidence? | <ul style="list-style-type: none"> <li>○ No studies</li> <li>○ Very low</li> <li>○ Low</li> <li>• <b>Moderate</b></li> <li>○ High</li> </ul> |                                                                                                                                                                                                                                                                                                                                                   |                                                              |                            |                                          |       |



|                                                                                                         |                                                                                                                                                                                                                                                       |                                     |                                  |                |                                       |                                     |
|---------------------------------------------------------------------------------------------------------|-------------------------------------------------------------------------------------------------------------------------------------------------------------------------------------------------------------------------------------------------------|-------------------------------------|----------------------------------|----------------|---------------------------------------|-------------------------------------|
| How substantial are the desirable anticipated effects of the intervention?                              | <ul style="list-style-type: none"> <li>• <b>Large</b></li> <li>○ Moderate</li> <li>○ Small</li> <li>○ Trivial</li> <li>○ Varies</li> <li>○ Don't know</li> </ul>                                                                                      | <b>Summary of findings (GRADE):</b> |                                  |                | Please provide supporting information |                                     |
|                                                                                                         |                                                                                                                                                                                                                                                       | <b>Outcome</b>                      | <b>N<sub>o</sub> of patients</b> |                |                                       | <b>Effect</b>                       |
|                                                                                                         |                                                                                                                                                                                                                                                       |                                     | <b>Intervention</b>              | <b>Control</b> |                                       | <b>Relative / Absolute (95% CI)</b> |
|                                                                                                         |                                                                                                                                                                                                                                                       |                                     |                                  |                |                                       |                                     |
| How substantial are the undesirable anticipated effects of the intervention?                            | <ul style="list-style-type: none"> <li>• <b>Trivial</b></li> <li>○ Small</li> <li>○ Moderate</li> <li>○ Large</li> <li>○ Varies</li> <li>○ Don't know</li> </ul>                                                                                      |                                     |                                  |                |                                       |                                     |
|                                                                                                         |                                                                                                                                                                                                                                                       |                                     |                                  |                |                                       |                                     |
|                                                                                                         |                                                                                                                                                                                                                                                       |                                     |                                  |                |                                       |                                     |
| Does the balance between desirable effects and undesirable effects favour the option of the comparison? | <ul style="list-style-type: none"> <li>• <b>Favours the option</b></li> <li>○ Probably favours the option</li> <li>○ Does not favour either</li> <li>○ Probably favours the comparison</li> <li>○ Favours the comparison</li> <li>○ Varies</li> </ul> |                                     |                                  |                |                                       |                                     |
|                                                                                                         |                                                                                                                                                                                                                                                       |                                     |                                  |                |                                       |                                     |
|                                                                                                         |                                                                                                                                                                                                                                                       |                                     |                                  |                |                                       |                                     |

|                               |                                                                                                                                                                             |                                                                                                                                                                                                                                                                                                                                                                                          |                                       |  |
|-------------------------------|-----------------------------------------------------------------------------------------------------------------------------------------------------------------------------|------------------------------------------------------------------------------------------------------------------------------------------------------------------------------------------------------------------------------------------------------------------------------------------------------------------------------------------------------------------------------------------|---------------------------------------|--|
| <b>Values and preferences</b> | Is there similarity about how much patients, researchers, clinicians and stake holders value the main Outcomes? Also include adverse effects and burden of the intervention | <ul style="list-style-type: none"> <li><input type="radio"/> No</li> <li><input type="radio"/> Probably no</li> <li><input checked="" type="radio"/> <b>Uncertain</b></li> <li><input type="radio"/> Probably yes</li> <li><input type="radio"/> Yes</li> <li><input type="radio"/> Varies</li> </ul>                                                                                    | Please provide supporting information |  |
|                               | What is the certainty of the evidence of resources requirements (costs)?                                                                                                    | <ul style="list-style-type: none"> <li><input type="radio"/> No studies</li> <li><input type="radio"/> Very low</li> <li><input type="radio"/> Low</li> <li><input checked="" type="radio"/> <b>Moderate</b></li> <li><input type="radio"/> High</li> </ul>                                                                                                                              | Please provide supporting information |  |
| <b>Resources</b>              | Does the cost effectiveness favour the intervention or the comparison?                                                                                                      | <ul style="list-style-type: none"> <li><input type="radio"/> Favours the option</li> <li><input checked="" type="radio"/> <b>Probably favours the option</b></li> <li><input type="radio"/> Does not favour either</li> <li><input type="radio"/> Probably favours the comparison</li> <li><input type="radio"/> Favours the comparison</li> <li><input type="radio"/> Varies</li> </ul> | Please provide supporting information |  |
|                               |                                                                                                                                                                             |                                                                                                                                                                                                                                                                                                                                                                                          |                                       |  |

|               |                                               |                                                                                                                                                                                                                                                                                                                             |                                       |  |
|---------------|-----------------------------------------------|-----------------------------------------------------------------------------------------------------------------------------------------------------------------------------------------------------------------------------------------------------------------------------------------------------------------------------|---------------------------------------|--|
| Equity        | What would be the impact on health equity?    | <ul style="list-style-type: none"> <li><input type="radio"/> Increased</li> <li><input checked="" type="radio"/> <b>Probably increased</b></li> <li><input type="radio"/> Uncertain</li> <li><input type="radio"/> Probably reduced</li> <li><input type="radio"/> Reduced</li> <li><input type="radio"/> Varies</li> </ul> | Please provide supporting information |  |
| Acceptability | Is the option acceptable to key stakeholders? | <ul style="list-style-type: none"> <li><input type="radio"/> No</li> <li><input type="radio"/> Probably no</li> <li><input type="radio"/> Uncertain</li> <li><input type="radio"/> Probably yes</li> <li><input checked="" type="radio"/> <b>Yes</b></li> <li><input type="radio"/> Varies</li> </ul>                       | Please provide supporting information |  |

|             |                                            |                                                                                                                                                                                                                                                                                                       |                                       |  |
|-------------|--------------------------------------------|-------------------------------------------------------------------------------------------------------------------------------------------------------------------------------------------------------------------------------------------------------------------------------------------------------|---------------------------------------|--|
| Feasibility | Is the intervention feasible to implement? | <ul style="list-style-type: none"> <li><input type="radio"/> No</li> <li><input type="radio"/> Probably no</li> <li><input type="radio"/> Uncertain</li> <li><input type="radio"/> Probably yes</li> <li><input checked="" type="radio"/> <b>Yes</b></li> <li><input type="radio"/> Varies</li> </ul> | Please provide supporting information |  |
|-------------|--------------------------------------------|-------------------------------------------------------------------------------------------------------------------------------------------------------------------------------------------------------------------------------------------------------------------------------------------------------|---------------------------------------|--|

**Should \_\_\_ be recommended for older adults to prevent and manage falls?**

| Type of recommendation        | Strong recommendation against the intervention<br><input type="radio"/>                                                                                                                                                                                                                                                                                                                                     | Weak recommendation against the intervention<br><input type="radio"/> | Conditional recommendation for either the intervention or the comparison<br><input type="radio"/> | <b>Weak recommendation for the intervention</b><br><input checked="" type="radio"/> | Strong recommendation for the intervention<br><input type="radio"/> |
|-------------------------------|-------------------------------------------------------------------------------------------------------------------------------------------------------------------------------------------------------------------------------------------------------------------------------------------------------------------------------------------------------------------------------------------------------------|-----------------------------------------------------------------------|---------------------------------------------------------------------------------------------------|-------------------------------------------------------------------------------------|---------------------------------------------------------------------|
| Recommendation                | Recommendation 3: We conditionally recommend that clinicians and caregivers in low- and middle-income countries settings should preferably use validated tools that are freely available in their country of residence to assess mobility and fall risk. GRADE: E                                                                                                                                           |                                                                       |                                                                                                   |                                                                                     |                                                                     |
| Justification                 | Whilst there is lack of firm evidence for the best single physical assessment tool to be used for assessment of gait and balance impairment among older adults with risk of falls in LMIC, timed up and go test (TUG), gait speed or muscle strength test (hand grip or sit to stand tests) may be used with reference to the normative data or cut off points established for the population if available. |                                                                       |                                                                                                   |                                                                                     |                                                                     |
| Subgroup considerations       | This recommendation is valid for all settings within LMICs: community, hospital, and long-term care.                                                                                                                                                                                                                                                                                                        |                                                                       |                                                                                                   |                                                                                     |                                                                     |
| Implementation considerations | These physical assessment tools may be used as an initial screening tool for falls risk in older adults. Further assessment should be performed using other comprehensive tools to identify specific impairment for personalised intervention.                                                                                                                                                              |                                                                       |                                                                                                   |                                                                                     |                                                                     |
| Monitoring and evaluation     | A routine assessment of gait and balance performance should be a part of a holistic multifactorial fall risk assessment in older people deemed to be at high risk of falls, at least biannually as a minimum interval.                                                                                                                                                                                      |                                                                       |                                                                                                   |                                                                                     |                                                                     |
| Research Priorities           | Further studies on the validity of physical assessment tool as a falls risk assessment for gait and balance impairment in older adults is required in LMICs.                                                                                                                                                                                                                                                |                                                                       |                                                                                                   |                                                                                     |                                                                     |

## References

1. Hill KD, Suttanon P, Lin SI, Tsang WWN, Ashari A, Hamid TAA, et al. What works in falls prevention in Asia: a systematic review and meta-analysis of randomized controlled trials. *BMC Geriatr*. 2018 Jan 5;18(1):3.
2. Ratnaprabha G, Shanahag D, Aswini B, Steffi C, Edwin B, Goud B. Prevalence of falls and risk assessment for falls among elderly in a rural area of Karnataka. *Ann community Heal* 2014;2:17-21.
3. Joyce-WS L, Zukri I, Ching S, Devaraj N. Factors associated with falls among the elderly attending a government clinic in Kuala Lumpur. *Malaysian J Med Heal Sci* 2020;16(1):183-90.
4. World Health Organization. Ageing. 2021 [Nov 30, 2021]; Available from: [https://www.who.int/health-topics/ageing#tab=tab\\_1](https://www.who.int/health-topics/ageing#tab=tab_1).
5. Loganathan A, Ng CJ, Low WY. Views and experiences of Malaysian older persons about falls and their prevention-A qualitative study. *BMC Geriatr*. 2016 May 6;16:97.
6. Stewart Williams J, Kowal P, Hestekin H, O'Driscoll T, Peltzer K, Yawson A, et al. Prevalence, risk factors and disability associated with fall-related injury in older adults in low- and middle-income countries: results from the WHO Study on global AGEing and adult health (SAGE). *BMC Med*. 2015 Jun 23;13:147.
7. Pinheiro Mde M, Ciconelli RM, Martini LA, Ferraz MB. Risk factors for recurrent falls among Brazilian women and men: the Brazilian Osteoporosis Study (BRAZOS). *Cad Saude Publica*. 2010 Jan;26(1):89-96.
8. Yu PL, Qin ZH, Shi J, Zhang J, Xin MZ, Wu ZL, et al. Prevalence and related factors of falls among the elderly in an urban community of Beijing. *Biomed Environ Sci*. 2009 Jun;22(3):179-87.
9. Rodrigues IG, Fraga GP, Barros MB. Falls among the elderly: risk factors in a population-based study. *Rev Bras Epidemiol*. 2014 Jul-Sep;17(3):705-18.
10. Limpawattana P, Sutra S, Thavompitak Y, Chindaprasirt J, Mairieng P. Geriatric hospitalizations due to fall-related injuries. *J Med Assoc Thai*. 2012 Jul;95 Suppl 7:S235-9.
11. Makhoul MM, Ayoub AI. Falls among institutionalized elderly in Alexandria. *J Egypt Public Health Assoc*. 2000;75(5-6):507-28.
12. Valderrama-Hinds LM, Al Snih S, Chen NW, Rodriguez MA, Wong R. Falls in Mexican older adults aged 60 years and older. *Aging Clin Exp Res*. 2018 Nov;30(11):1345-51.
13. Shi J, Zhou BY, Tao YK, Yu PL, Zhang CF, Qin ZH, et al. Incidence and associated factors for single and recurrent falls among the elderly in an urban community of Beijing. *Biomed Environ Sci*. 2014 Dec;27(12):939-49.
14. Naharci MI, Oguz EO, Celebi F, Oguz SO, Yilmaz O, Tasci I. Psychoactive drug use and falls among community-dwelling Turkish older people. *North Clin Istanbul*. 2020;7(3):260-6.
15. Pimentel WRT, Pagotto V, Stopa SR, Hoffmann M, Andrade FB, Souza Junior PRB, et al. Falls among Brazilian older adults living in urban areas: ELSI-Brazil. *Rev Saude Publica*. 2018 Oct 25;52Suppl 2(Suppl 2):12s.
16. Manso M, de Souza D, Teixeira C, Leis D, Malaman C, de Almeida Carvalho D. Fatores de risco associados a quedas em um grupo de idosos vinculados a um plano de saúde. *Rev Kairós Gerontol*. 2018;21:131-47.
17. Ozturk ZA, Turkbeyler IH, Abiyev A, Kul S, Edizer B, Yakaryilmaz FD, et al. Health-related quality of life and fall risk associated with age-related body composition changes; sarcopenia, obesity and sarcopenic obesity. *Intern Med J*. 2018 Aug;48(8):973-81.
18. Máximo R, Santos J, Perracini M, Oliveira C, Duarte Y, Alexandre T. Abdominal obesity, dynapenia and dynapenic-abdominal obesity as factors associated with falls. *Brazilian J Phys Ther* 2019;23:497-505.
19. Szlejf C, Parra-Rodriguez L, Rosas-Carrasco O. Osteosarcopenic Obesity: Prevalence and Relation With Frailty and Physical Performance in Middle-Aged and Older Women. *J Am Med Dir Assoc*. 2017 Aug 1;18(8):733 e1- e5.
20. Waters DL, Qualls CR, Cesari M, Rolland Y, Vlietstra L, Vellas B. Relationship of Incident Falls with Balance Deficits and Body Composition in Male and Female Community-Dwelling Elders. *J Nutr Health Aging*. 2019;23(1):9-13.

21. Allain TJ, Mwambelo M, Mdolo T, Mfuno P. Falls and other geriatric syndromes in Blantyre, Malawi: a community survey of older adults. *Malawi Med J*. 2014 Dec;26(4):105-8.
22. Wettasinghe AH, Dissanayake DWN, Allet L, Katulanda P, Lord SR. Falls in older people with diabetes: Identification of simple screening measures and explanatory risk factors. *Prim Care Diabetes*. 2020 Dec;14(6):723-8.
23. Wettasinghe A, Dissanayake D, Allet L, Katulanda P, Lord S. The impact of physical, neurological and cognitive deficits on risk of falls in people with type 2 diabetes mellitus: a review. *Sri Lanka Journal of Diabetes, Endocrinology and Metabolism*. 2020;10:8-25.
24. Araújo R, Nascimento É, Barros R, Ritter S, Abreu A, Garcia P. Can clinical and physical-functional factors predict falls in cognitively impaired older adults? . *Rev Bras Geriatr e Gerontol*. 2020;22.
25. Coutinho ES, Fletcher A, Bloch KV, Rodrigues LC. Risk factors for falls with severe fracture in elderly people living in a middle-income country: a case control study. *BMC Geriatr*. 2008 Aug 26;8:21.
26. Baixinho CL, Dixe MDA, Madeira C, Alves S, Henriques MA. Falls in institutionalized elderly with and without cognitive decline A study of some factors. *Dement Neuropsychol*. 2019 Jan-Mar;13(1):116-21.
27. Safarpour M, Hosseini SR, Mohamadzade M, Bijani A, Fotouhi A. Predictors of Incidence of Fall in Elderly Women; A Six-Month Cohort Study. *Bull Emerg Trauma*. 2018 Jul;6(3):226-32.
28. Smith L, Jacob L, Kostev K, Butler L, Barnett Y, Pfeifer B, et al. Mild cognitive impairment is associated with fall-related injury among adults aged  $\geq 65$  years in low- and middle-income countries. *Exp Gerontol*. 2021 Apr;146:111222.
29. Kato-Narita EM, Radanovic M. Characteristics of falls in mild and moderate Alzheimer's disease. *Dement Neuropsychol*. 2009 Oct-Dec;3(4):337-43.
30. Worapanwisit T, Prappai S, Rosenberg E. Correlates of Falls among Community-Dwelling Elderly in Thailand. *J Aging Res*. 2018;2018:8546085.
31. Kuhirunyaratn P, Prasomrak P, Jindawong B. Factors related to falls among community dwelling elderly. *Southeast Asian J Trop Med Public Health*. 2013 Sep;44(5):906-15.
32. Mukadam N, Sommerlad A, Huntley J, Livingston G. Population attributable fractions for risk factors for dementia in low-income and middle-income countries: an analysis using cross-sectional survey data. *Lancet Glob Health*. 2019 May;7(5):e596-e603.
33. Chaiwanichsiri D, Janchai S, Tantisiriwat N. Foot disorders and falls in older persons. *Gerontology*. 2009;55(3):296-302.
34. Prince M, Acosta D, Ferri CP, Guerra M, Huang Y, Llibre Rodriguez JJ, et al. Dementia incidence and mortality in middle-income countries, and associations with indicators of cognitive reserve: a 10/66 Dementia Research Group population-based cohort study. *Lancet*. 2012 Jul 7;380(9836):50-8.
35. Templin T, Cravo Oliveira Hashiguchi T, Thomson B, Dieleman J, Bendavid E. The overweight and obesity transition from the wealthy to the poor in low- and middle-income countries: A survey of household data from 103 countries. *PLoS Med*. 2019 Nov;16(11):e1002968.
36. Ong F, Phillips D. Older consumers in Malaysia. *Int J Ageing Later Life* 2007;2:85-117.
37. Manajit S, Samutachak B, Voelker M. Socio-Economic Determinants of Consumption Patterns in Thailand. *Asia-Pacific Soc Sci Rev* 2020;20.
38. National Institute for Health and Care Excellence (NICE). Falls in older people: assessing risk and prevention. National Institute for Health and Care Excellence; 2013; Available from: <https://www.nice.org.uk/guidance/cg161>.
39. Strini V, Schiavolin R, Prendin A. Fall Risk Assessment Scales: A Systematic Literature Review. *Nurs Rep*. 2021 Jun 2;11(2):430-43.
40. Samah ZA, Singh DKA, Murukesu RR, Shahar S, Nordin NAM, Omar MA, et al. Discriminative and predictive ability of physical performance measures in identifying fall risk among older adults. *Sains Malaysiana*. 2018;47(11):2769-76.
41. Singh DKA, Samah ZA, Shahar S, Omar MA, Shaharudin MI, Chin AV. Sociodemographic characteristics as determinants and physical performance measures as correlates of falls among Malaysian community-dwelling older adults: A prospective study. *Topics in Geriatric Rehabilitation*. 2019;35(2):113-8.

42. Ooi TC, Singh DKA, Shahar S, Rajab NF, Vanoh D, Sharif R, et al. Incidence and multidimensional predictors of occasional and recurrent falls among Malaysian community-dwelling older persons. *BMC Geriatr.* 2021 Mar 2;21(1):154.
43. ; Available from: <https://onlinelibrary.wiley.com/journal/14470594>.
44. Beck Jepsen D, Robinson K, Ogliari G, Montero-Odasso M, Kamkar N, Ryg J, et al. Predicting falls in older adults: an umbrella review of instruments assessing gait, balance, and functional mobility. *BMC Geriatr.* 2022 Jul 25;22(1):615.

## Working Group 10: Multifactorial falls Risk Assessment and Interventions for Preventing Falls in Community-Dwelling Older Adults

### Recommendations for Working Group 10: Multifactorial falls Risk Assessment and Interventions for Preventing Falls in Community-Dwelling Older Adults

**Recommendation 1 (Assessment):** We recommend multiprofessional, multifactorial falls risk assessment to community-dwelling older adults identified to be at high risk of falling, to guide tailored interventions. **GRADE: 1B**

**Recommendation 2 (Interventions):** We recommend offering multidomain interventions, informed by a multiprofessional, multifactorial falls risk assessment to community-dwelling older adults identified to be at high risk of falling. **GRADE: 1B**

| <b>Population:</b>      | Older adults aged $\geq 65$     | <i>Objective: Given its multifactorial nature, it is assumed that comprehensive geriatric assessment (CGA) leading to individually targeted interventions would be effective. Previous literature has shown that several good quality trials have resulted in a reduction in falls [1,2]. Our objective was to update the literature to assess if multidomain interventions (i.e. interventions with two or more components, individually targeted) reduce the rate of falls and risk of falling in community-dwelling older adults.</i> |                   |                                         |
|-------------------------|---------------------------------|------------------------------------------------------------------------------------------------------------------------------------------------------------------------------------------------------------------------------------------------------------------------------------------------------------------------------------------------------------------------------------------------------------------------------------------------------------------------------------------------------------------------------------------|-------------------|-----------------------------------------|
| <b>Intervention:</b>    | Multidomain intervention        |                                                                                                                                                                                                                                                                                                                                                                                                                                                                                                                                          |                   |                                         |
| <b>Comparison:</b>      | Standard care                   |                                                                                                                                                                                                                                                                                                                                                                                                                                                                                                                                          |                   |                                         |
| <b>Main outcomes:</b>   | Falls, Concerns about falling   |                                                                                                                                                                                                                                                                                                                                                                                                                                                                                                                                          |                   |                                         |
| <b>Setting:</b>         | Community-dwelling older adults |                                                                                                                                                                                                                                                                                                                                                                                                                                                                                                                                          |                   |                                         |
| <b>Perspective:</b>     | Population                      |                                                                                                                                                                                                                                                                                                                                                                                                                                                                                                                                          |                   |                                         |
| Decision Domain         |                                 | Judgements                                                                                                                                                                                                                                                                                                                                                                                                                                                                                                                               | Research Evidence | Additional Considerations /Explanations |
| Priority of the Problem | Is the problem a priority?      | <ul style="list-style-type: none"> <li>○ No</li> <li>○ Probably no</li> <li>○ Uncertain</li> <li>○ Probably yes</li> <li>● <b>Yes</b></li> <li>○ Varies</li> </ul>                                                                                                                                                                                                                                                                                                                                                                       |                   |                                         |
|                         |                                 |                                                                                                                                                                                                                                                                                                                                                                                                                                                                                                                                          |                   |                                         |



|                                                 |                                                                                                                                              |                                                                                                                                                                                                                                                                                                         |                                                              |                            |                                          |       |
|-------------------------------------------------|----------------------------------------------------------------------------------------------------------------------------------------------|---------------------------------------------------------------------------------------------------------------------------------------------------------------------------------------------------------------------------------------------------------------------------------------------------------|--------------------------------------------------------------|----------------------------|------------------------------------------|-------|
| <b>Benefits and harms</b><br>(see below)        | Is there important uncertainty or variability in how much patients, researchers, clinicians and stake holders value the main outcomes?       | <ul style="list-style-type: none"> <li>○ Important uncertainty or variability</li> <li>○ Possibly important uncertainty or variability</li> <li>● <b>Probably no important uncertainty of variability</b></li> <li>○ No important uncertainty of variability</li> <li>○ No known undesirable</li> </ul> | <b>Relative importance of the main outcomes of interest:</b> |                            |                                          | None. |
|                                                 |                                                                                                                                              |                                                                                                                                                                                                                                                                                                         | <b>Outcome</b>                                               | <b>Relative Importance</b> | <b>Certainty of the evidence (GRADE)</b> |       |
|                                                 |                                                                                                                                              |                                                                                                                                                                                                                                                                                                         | Falls                                                        | Critical                   | ⊕⊕⊕○<br>MODERATE                         |       |
|                                                 |                                                                                                                                              |                                                                                                                                                                                                                                                                                                         | Concerns about falling                                       | Critical                   | ⊕⊕⊕○<br>MODERATE                         |       |
|                                                 |                                                                                                                                              |                                                                                                                                                                                                                                                                                                         |                                                              |                            | ○○○○<br>MODERATE                         |       |
|                                                 |                                                                                                                                              |                                                                                                                                                                                                                                                                                                         |                                                              |                            | ○○○○<br>MODERATE                         |       |
|                                                 |                                                                                                                                              |                                                                                                                                                                                                                                                                                                         |                                                              |                            | ○○○○<br>MODERATE                         |       |
|                                                 |                                                                                                                                              |                                                                                                                                                                                                                                                                                                         |                                                              |                            | ○○○○<br>MODERATE                         |       |
|                                                 |                                                                                                                                              |                                                                                                                                                                                                                                                                                                         |                                                              |                            | ○○○○<br>MODERATE                         |       |
|                                                 |                                                                                                                                              |                                                                                                                                                                                                                                                                                                         |                                                              |                            | ○○○○<br>MODERATE                         |       |
| What is the overall certainty of this evidence? | <ul style="list-style-type: none"> <li>○ No studies</li> <li>○ Very low</li> <li>○ Low</li> <li>● <b>Moderate</b></li> <li>○ High</li> </ul> |                                                                                                                                                                                                                                                                                                         |                                                              |                            |                                          |       |

|                                                                                                         |                                                                                                                                                                                                                                                       |                                     |                       |                |                            |                                     |
|---------------------------------------------------------------------------------------------------------|-------------------------------------------------------------------------------------------------------------------------------------------------------------------------------------------------------------------------------------------------------|-------------------------------------|-----------------------|----------------|----------------------------|-------------------------------------|
| How substantial are the desirable anticipated effects of the intervention?                              | <ul style="list-style-type: none"> <li>○ Large</li> <li>● <b>Moderate</b></li> <li>○ Small</li> <li>○ Trivial</li> <li>○ Varies</li> <li>○ Don't know</li> </ul>                                                                                      | <b>Summary of findings (GRADE):</b> |                       |                | * Dautzenberg et al., 2021 |                                     |
|                                                                                                         |                                                                                                                                                                                                                                                       | <b>Outcome</b>                      | <b>Nº of patients</b> |                |                            | <b>Effect</b>                       |
|                                                                                                         |                                                                                                                                                                                                                                                       |                                     | <b>Intervention</b>   | <b>Control</b> |                            | <b>Relative / Absolute (95% CI)</b> |
| How substantial are the undesirable anticipated effects of the intervention?                            | <ul style="list-style-type: none"> <li>● <b>Trivial</b></li> <li>○ Small</li> <li>○ Moderate</li> <li>○ Large</li> <li>○ Varies</li> <li>○ Don't know</li> </ul>                                                                                      | Fall rate*                          | Multifactorial        |                | RR: 0.87<br>(0.80 – 0.95)  |                                     |
| Does the balance between desirable effects and undesirable effects favour the option of the comparison? | <ul style="list-style-type: none"> <li>○ Favours the option</li> <li>● <b>Probably favours the option</b></li> <li>○ Does not favour either</li> <li>○ Probably favours the comparison</li> <li>○ Favours the comparison</li> <li>○ Varies</li> </ul> | Number of fallers*                  | Multifactorial        |                | RR: 0.95<br>(0.89 – 1.01)  |                                     |
|                                                                                                         |                                                                                                                                                                                                                                                       |                                     |                       |                |                            |                                     |

|                                                                        |                                                                                                                                                                             |                                                                                                                                                                                                                                                                             |                                                                                                                                              |                                                       |
|------------------------------------------------------------------------|-----------------------------------------------------------------------------------------------------------------------------------------------------------------------------|-----------------------------------------------------------------------------------------------------------------------------------------------------------------------------------------------------------------------------------------------------------------------------|----------------------------------------------------------------------------------------------------------------------------------------------|-------------------------------------------------------|
| Values and preferences                                                 | Is there similarity about how much patients, researchers, clinicians and stake holders value the main Outcomes? Also include adverse effects and burden of the intervention | <ul style="list-style-type: none"> <li>○ No</li> <li>○ Probably no</li> <li>○ Uncertain</li> <li>● <b>Probably yes</b></li> <li>○ Yes</li> <li>○ Varies</li> </ul>                                                                                                          |                                                                                                                                              |                                                       |
|                                                                        | Resources                                                                                                                                                                   | What is the certainty of the evidence of resources requirements (costs)?                                                                                                                                                                                                    | <ul style="list-style-type: none"> <li>● <b>No studies</b></li> <li>○ Very low</li> <li>○ Low</li> <li>○ Moderate</li> <li>○ High</li> </ul> | No mention of costs associated with the intervention. |
| Does the cost effectiveness favour the intervention or the comparison? |                                                                                                                                                                             | <ul style="list-style-type: none"> <li>● <b>No studies</b></li> <li>○ Favours the option</li> <li>○ Probably favours the option</li> <li>○ Does not favour either</li> <li>○ Probably favours the comparison</li> <li>○ Favours the comparison</li> <li>○ Varies</li> </ul> |                                                                                                                                              |                                                       |

|               |                                               |                                                                                                                                                                                                                                                                                                                             |                                                          |  |
|---------------|-----------------------------------------------|-----------------------------------------------------------------------------------------------------------------------------------------------------------------------------------------------------------------------------------------------------------------------------------------------------------------------------|----------------------------------------------------------|--|
| Equity        | What would be the impact on health equity?    | <ul style="list-style-type: none"> <li><input type="radio"/> Increased</li> <li><input type="radio"/> Probably increased</li> <li><input checked="" type="radio"/> <b>Uncertain</b></li> <li><input type="radio"/> Probably reduced</li> <li><input type="radio"/> Reduced</li> <li><input type="radio"/> Varies</li> </ul> | No mention of the interventions impact on health equity. |  |
| Acceptability | Is the option acceptable to key stakeholders? | <ul style="list-style-type: none"> <li><input type="radio"/> No</li> <li><input type="radio"/> Probably no</li> <li><input type="radio"/> Uncertain</li> <li><input checked="" type="radio"/> <b>Probably yes</b></li> <li><input type="radio"/> Yes</li> <li><input type="radio"/> Varies</li> </ul>                       |                                                          |  |

|             |                                            |                                                                                                                                                                                                                                                                                                       |  |  |
|-------------|--------------------------------------------|-------------------------------------------------------------------------------------------------------------------------------------------------------------------------------------------------------------------------------------------------------------------------------------------------------|--|--|
| Feasibility | Is the intervention feasible to implement? | <ul style="list-style-type: none"> <li><input type="radio"/> No</li> <li><input type="radio"/> Probably no</li> <li><input type="radio"/> Uncertain</li> <li><input type="radio"/> Probably yes</li> <li><input checked="" type="radio"/> <b>Yes</b></li> <li><input type="radio"/> Varies</li> </ul> |  |  |
|-------------|--------------------------------------------|-------------------------------------------------------------------------------------------------------------------------------------------------------------------------------------------------------------------------------------------------------------------------------------------------------|--|--|

**Should multidomain interventions offered to community-dwelling older adults identified to be at moderate or high risk of falling, to reduce the rate of falls and risk of falling be recommended for older adults to prevent and manage falls?**

| Type of recommendation        | Strong recommendation against the intervention<br><input type="radio"/>                                                                                                                                                                                                                                                                                                                                                                                                                                                                                                                                                                                                                                                                                                                                                                                                                                                                                                                                                                                                                                                                                                                                                                                                                                                                                                                                 | Weak recommendation against the intervention<br><input type="radio"/> | Conditional recommendation for either the intervention or the comparison<br><input type="radio"/> | Weak recommendation for the intervention<br><input type="radio"/> | Strong recommendation for the intervention<br><input checked="" type="radio"/> |
|-------------------------------|---------------------------------------------------------------------------------------------------------------------------------------------------------------------------------------------------------------------------------------------------------------------------------------------------------------------------------------------------------------------------------------------------------------------------------------------------------------------------------------------------------------------------------------------------------------------------------------------------------------------------------------------------------------------------------------------------------------------------------------------------------------------------------------------------------------------------------------------------------------------------------------------------------------------------------------------------------------------------------------------------------------------------------------------------------------------------------------------------------------------------------------------------------------------------------------------------------------------------------------------------------------------------------------------------------------------------------------------------------------------------------------------------------|-----------------------------------------------------------------------|---------------------------------------------------------------------------------------------------|-------------------------------------------------------------------|--------------------------------------------------------------------------------|
| Recommendation                | <p>Recommendation 1: We recommend multiprofessional, multifactorial falls risk assessment to community-dwelling older adults identified to be at high risk of falling, to guide tailored interventions. GRADE: 1B</p> <p>Recommendation 2: We recommend offering multidomain interventions, informed by a multiprofessional, multifactorial falls risk assessment to community-dwelling older adults identified to be at high risk of falling. GRADE: 1B</p>                                                                                                                                                                                                                                                                                                                                                                                                                                                                                                                                                                                                                                                                                                                                                                                                                                                                                                                                            |                                                                       |                                                                                                   |                                                                   |                                                                                |
| Justification                 | <p>We based our recommendation on above summarized recent systematic review and network meta-analyses on interventions for preventing falls in community dwelling older adults, which was published in 2021 [3], two Cochrane systematic reviews assessing multidomain interventions for prevention of falls in older people living in the community [1,2] and two WHO summary reports on falls prevention in community dwelling older persons [6,7]. The 2021 comprehensive systematic review and network meta-analysis consisted of 192 studies (randomized trials and quasiexperimental trials) enrolling community-dwelling participants <math>\geq 65</math> years old. Studies enrolling specific patient populations (e.g., those with a stroke or Parkinson disease) were excluded. Its literature search was completed on February 27, 2019, thus post-hoc analyses were conducted including two large, randomized trials of multidomain interventions for preventing falls that were published in 2020 [4, 5]. These post-hoc analyses did not substantively alter network meta-analysis results or our recommendations. Review authors rated their certainty in the evidence using the CINeMA tool, which assesses the confidence in network meta-analysis results as per six domains: within-study bias, reporting bias, indirectness, imprecision, heterogeneity, and incoherence [8].</p> |                                                                       |                                                                                                   |                                                                   |                                                                                |
| Subgroup considerations       | <p>This recommendation is targeted to community-dwelling older adults. Multidomain interventions in other settings (hospital and nursing homes) are addressed in separate recommendations (working group 5).</p>                                                                                                                                                                                                                                                                                                                                                                                                                                                                                                                                                                                                                                                                                                                                                                                                                                                                                                                                                                                                                                                                                                                                                                                        |                                                                       |                                                                                                   |                                                                   |                                                                                |
| Implementation considerations | <p>Two recent pragmatic trials [4,5] illustrated that within current health care systems (UK and US) it is difficult to successfully implement interventions proven to be effective in previous smaller research trial settings [1,9]. For successful and durable implementation of falls prevention interventions, collaboration between relevant medical disciplines, health care insurers and governmental bodies is deemed to be essential. Effective policies require engagement with appropriate stakeholders, which should include decision- and policymakers, healthcare funders, health care professionals, and older peoples' associations and advocates [6].</p>                                                                                                                                                                                                                                                                                                                                                                                                                                                                                                                                                                                                                                                                                                                             |                                                                       |                                                                                                   |                                                                   |                                                                                |

|                           |                                                                                                                                                                                                                                                                                                                                                                                                                                                                                                                                                                      |
|---------------------------|----------------------------------------------------------------------------------------------------------------------------------------------------------------------------------------------------------------------------------------------------------------------------------------------------------------------------------------------------------------------------------------------------------------------------------------------------------------------------------------------------------------------------------------------------------------------|
| Monitoring and evaluation | Monitoring and evaluation of uptake of the intervention is warranted as it is the key to effectiveness. The intervention might need further adaptation upon follow-up, individualized according to the risk profile and goals and wishes of the older person.                                                                                                                                                                                                                                                                                                        |
| Research Priorities       | Further research is needed to assess how best to implement multifactorial strategies most cost-effectively. It is likely that the enhanced services would cost more to the prevention service provider but less to the health and social care system if sufficient falls, fractures, and other injuries are prevented thereby reducing hospital admissions and ongoing need for social care. Also, different risk groups may benefit from different interventions. Finally, studies in different settings, including low- and middle-income countries are warranted. |

### References

1. Gillespie LD, Robertson MC, Gillespie WJ, Sherrington C, Gates S, Clemson LM, et al. Interventions for preventing falls in older people living in the community. *Cochrane Database Syst Rev*. 2012 Sep 12(9):CD007146.
2. Hopewell S, Adedire O, Copey BJ, Boniface GJ, Sherrington C, Clemson L, et al. Multifactorial and multiple component interventions for preventing falls in older people living in the community. *Cochrane Database Syst Rev*. 2018 Jul 23;7:CD012221.
3. Dautzenberg L, Beglinger S, Tsokani S, Zevgiti S, Rajjmann R, Rodondi N, et al. Interventions for preventing falls and fall-related fractures in community-dwelling older adults: A systematic review and network meta-analysis. *J Am Geriatr Soc*. 2021 Oct;69(10):2973-84.
4. Lamb SE, Bruce J, Hossain A, Ji C, Longo R, Lall R, et al. Screening and Intervention to Prevent Falls and Fractures in Older People. *N Engl J Med*. 2020 Nov 5;383(19):1848-59.
5. Bhasin S, Gill TM, Reuben DB, Latham NK, Ganz DA, Greene EJ, et al. A Randomized Trial of a Multifactorial Strategy to Prevent Serious Fall Injuries. *N Engl J Med*. 2020 Jul 9;383(2):129-40.
6. World Health Organization. Step safely: strategies for preventing and managing falls across the life-course. Geneva: World Health Organization, 2021.
7. World Health Organization. Evidence profile: risk of falls - Integrated care for older people: World Health Organization.
8. Nikolakopoulou A, Higgins JPT, Papakonstantinou T, Chaimani A, Del Giovane C, Egger M, et al. CINeMA: An approach for assessing confidence in the results of a network meta-analysis. *PLoS Med*. 2020 Apr;17(4):e1003082.
9. Montero-Odasso M, van der Velde N, Alexander NB, Becker C, Blain H, Camicioli R, et al. New horizons in falls prevention and management for older adults: a global initiative. *Age Ageing*. 2021 Sep 11;50(5):1499-507.
10. Montero-Odasso MM, Kamkar N, Pieruccini-Faria F, Osman A, Sarquis-Adamson Y, Close J, et al. Evaluation of Clinical Practice Guidelines on Fall Prevention and Management for Older Adults: A Systematic Review. *JAMA Netw Open*. 2021 Dec 1;4(12):e2138911.
11. Gawronska K, Lorkowski J. Falls as One of the Atypical Presentations of COVID-19 in Older Population. *Geriatr Orthop Surg Rehabil*. 2021;12:2151459321996619.

## Working Group 11: Older Adults' Perspectives on Falls

### Recommendations for Working Group 11: Older Adults' Perspectives on Falls

**Recommendation 1 (Stratification):** We recommend clinicians should routinely ask about falls in their interactions with older adults. **GRADE: 1A**

**Recommendation 2 (Assessment):** As part of a multifactorial falls risk assessment, clinicians should enquire about the perceptions the older adult holds about falls, their causes, future risk, and how they can be prevented. **GRADE: 1B.**

**Recommendation 3 (Interventions):** A care plan developed to prevent falls and related injuries should incorporate the values and preferences of the older adult. **GRADE: 1B.**

| <b>Population:</b>      | Older adults aged $\geq 60$                                                                                                                | <i>Objective: Up to a third of community-dwelling older people fall annually.<sup>2</sup> They are the leading cause of fatal and non-fatal injuries in this age group<sup>2</sup> and can also precipitate functional decline, loss of independence, and psychological distress.<sup>3</sup> Given the high prevalence of falls among older people and their potential adverse impacts on both personal health and healthcare utilization, various interventions have been designed to prevent falls or minimize the risk of injury from them.<sup>3,4</sup> Their uptake will be influenced by how serious older people view falls and their belief that they are preventable.<sup>5</sup></i> |                                      |                                         |
|-------------------------|--------------------------------------------------------------------------------------------------------------------------------------------|--------------------------------------------------------------------------------------------------------------------------------------------------------------------------------------------------------------------------------------------------------------------------------------------------------------------------------------------------------------------------------------------------------------------------------------------------------------------------------------------------------------------------------------------------------------------------------------------------------------------------------------------------------------------------------------------------|--------------------------------------|-----------------------------------------|
| <b>Intervention:</b>    | 1 & 2: Ask for the occurrence and perception of falls during fall's assessment<br>3: Developed care plan incorporating patient preferences |                                                                                                                                                                                                                                                                                                                                                                                                                                                                                                                                                                                                                                                                                                  |                                      |                                         |
| <b>Comparison:</b>      | Usual care                                                                                                                                 |                                                                                                                                                                                                                                                                                                                                                                                                                                                                                                                                                                                                                                                                                                  |                                      |                                         |
| <b>Main outcomes:</b>   | Falls                                                                                                                                      |                                                                                                                                                                                                                                                                                                                                                                                                                                                                                                                                                                                                                                                                                                  |                                      |                                         |
| <b>Setting:</b>         | Community-dwelling older adults                                                                                                            |                                                                                                                                                                                                                                                                                                                                                                                                                                                                                                                                                                                                                                                                                                  |                                      |                                         |
| <b>Perspective:</b>     | Population                                                                                                                                 |                                                                                                                                                                                                                                                                                                                                                                                                                                                                                                                                                                                                                                                                                                  |                                      |                                         |
| Decision Domain         |                                                                                                                                            | Judgements                                                                                                                                                                                                                                                                                                                                                                                                                                                                                                                                                                                                                                                                                       | Research Evidence                    | Additional Considerations /Explanations |
| Priority of the Problem | Is the problem a priority?                                                                                                                 | <ul style="list-style-type: none"> <li>○ No</li> <li>○ Probably no</li> <li>○ Uncertain</li> <li>○ Probably yes</li> <li>● <b>Yes</b></li> <li>○ Varies</li> </ul>                                                                                                                                                                                                                                                                                                                                                                                                                                                                                                                               | See 'Overview of the Problem' above. |                                         |

|                                                 |                                                                                                                                              |                                                                                                                                                                                                                                                                                                         |                                                              |                            |                                          |  |
|-------------------------------------------------|----------------------------------------------------------------------------------------------------------------------------------------------|---------------------------------------------------------------------------------------------------------------------------------------------------------------------------------------------------------------------------------------------------------------------------------------------------------|--------------------------------------------------------------|----------------------------|------------------------------------------|--|
| <b>Benefits and harms</b><br>(see below)        | Is there important uncertainty or variability in how much patients, researchers, clinicians and stake holders value the main outcomes?       | <ul style="list-style-type: none"> <li>○ Important uncertainty or variability</li> <li>● <b>Possibly important uncertainty or variability</b></li> <li>○ Probably no important uncertainty of variability</li> <li>○ No important uncertainty of variability</li> <li>○ No known undesirable</li> </ul> | <i>Relative importance of the main outcomes of interest:</i> |                            |                                          |  |
|                                                 |                                                                                                                                              |                                                                                                                                                                                                                                                                                                         | <b>Outcome</b>                                               | <b>Relative Importance</b> | <b>Certainty of the evidence (GRADE)</b> |  |
|                                                 |                                                                                                                                              |                                                                                                                                                                                                                                                                                                         | Falls                                                        | Critical                   | ⊕⊕⊕○<br>MODERATE                         |  |
|                                                 |                                                                                                                                              |                                                                                                                                                                                                                                                                                                         | Concerns about falling                                       | Critical                   | ⊕⊕⊕○<br>MODERATE                         |  |
|                                                 |                                                                                                                                              |                                                                                                                                                                                                                                                                                                         |                                                              |                            | ○○○○<br>MODERATE                         |  |
|                                                 |                                                                                                                                              |                                                                                                                                                                                                                                                                                                         |                                                              |                            | ○○○○<br>MODERATE                         |  |
|                                                 |                                                                                                                                              |                                                                                                                                                                                                                                                                                                         |                                                              |                            | ○○○○<br>MODERATE                         |  |
|                                                 |                                                                                                                                              |                                                                                                                                                                                                                                                                                                         |                                                              |                            | ○○○○<br>MODERATE                         |  |
|                                                 |                                                                                                                                              |                                                                                                                                                                                                                                                                                                         |                                                              |                            | ○○○○<br>MODERATE                         |  |
|                                                 |                                                                                                                                              |                                                                                                                                                                                                                                                                                                         |                                                              |                            | ○○○○<br>MODERATE                         |  |
| What is the overall certainty of this evidence? | <ul style="list-style-type: none"> <li>○ No studies</li> <li>○ Very low</li> <li>○ Low</li> <li>● <b>Moderate</b></li> <li>○ High</li> </ul> |                                                                                                                                                                                                                                                                                                         |                                                              |                            |                                          |  |



|                                                                                                         |                                                                                                                                                                                                                                                       |                                     |                       |                                     |                                                                                                                                                                                                     |                         |
|---------------------------------------------------------------------------------------------------------|-------------------------------------------------------------------------------------------------------------------------------------------------------------------------------------------------------------------------------------------------------|-------------------------------------|-----------------------|-------------------------------------|-----------------------------------------------------------------------------------------------------------------------------------------------------------------------------------------------------|-------------------------|
| How substantial are the desirable anticipated effects of the intervention?                              | <ul style="list-style-type: none"> <li>○ Large</li> <li>● <b>Moderate</b></li> <li>○ Small</li> <li>○ Trivial</li> <li>○ Varies</li> <li>○ Don't know</li> </ul>                                                                                      | <b>Summary of findings (GRADE):</b> |                       |                                     | * Becker C, Kron M, Lindemann U, et al. Effectiveness of a multifaceted intervention on falls in nursing home residents. J Am Geriatr Soc. 2003;51(3):306-313. doi:10.1046/j.1532-5415.2003.51103.x |                         |
| How substantial are the undesirable anticipated effects of the intervention?                            | <ul style="list-style-type: none"> <li>● <b>Trivial</b></li> <li>○ Small</li> <li>○ Moderate</li> <li>○ Large</li> <li>○ Varies</li> <li>○ Don't know</li> </ul>                                                                                      | <b>Outcome</b>                      | <b>Nº of patients</b> |                                     |                                                                                                                                                                                                     | <b>Effect</b>           |
| Does the balance between desirable effects and undesirable effects favour the option of the comparison? | <ul style="list-style-type: none"> <li>○ Favours the option</li> <li>● <b>Probably favours the option</b></li> <li>○ Does not favour either</li> <li>○ Probably favours the comparison</li> <li>○ Favours the comparison</li> <li>○ Varies</li> </ul> | <b>Intervention</b>                 | <b>Control</b>        | <b>Relative / Absolute (95% CI)</b> |                                                                                                                                                                                                     |                         |
|                                                                                                         |                                                                                                                                                                                                                                                       | Falls*                              | 547                   | 980                                 |                                                                                                                                                                                                     | RR = 0.55 (0.41 – 0.73) |
|                                                                                                         |                                                                                                                                                                                                                                                       | Number of fallers*                  | 188                   | 247                                 | RR = 0.75 (0.57 – 0.98)                                                                                                                                                                             |                         |
|                                                                                                         |                                                                                                                                                                                                                                                       | Fall Frequency*                     | 66                    | 115                                 | RR = 0.56 (0.35 – 0.89)                                                                                                                                                                             |                         |

|                               |                                                                                                                                                                             |                                                                                                                                                                                                                                                       |                                                                                                                                                                                                                                                                                                                       |  |
|-------------------------------|-----------------------------------------------------------------------------------------------------------------------------------------------------------------------------|-------------------------------------------------------------------------------------------------------------------------------------------------------------------------------------------------------------------------------------------------------|-----------------------------------------------------------------------------------------------------------------------------------------------------------------------------------------------------------------------------------------------------------------------------------------------------------------------|--|
| <b>Values and preferences</b> | Is there similarity about how much patients, researchers, clinicians and stake holders value the main Outcomes? Also include adverse effects and burden of the intervention | <ul style="list-style-type: none"> <li>○ No</li> <li>○ Probably no</li> <li>● <b>Uncertain</b></li> <li>○ Probably yes</li> <li>○ Yes</li> <li>○ Varies</li> </ul>                                                                                    | <ul style="list-style-type: none"> <li>● A significant proportion of older people viewed falls and related injuries as something either intrinsically tied to aging or arising from chance – in other words, inevitable.<sup>11,12,20,23,30,33,41</sup></li> <li>● No mentioned burden of the intervention</li> </ul> |  |
| <b>Resources</b>              | What is the certainty of the evidence of resources requirements (costs)?                                                                                                    | <ul style="list-style-type: none"> <li>● <b>No studies</b></li> <li>○ Very low</li> <li>○ Low</li> <li>○ Moderate</li> <li>○ High</li> </ul>                                                                                                          | N/A<br>No mention of any costs associated to these recommendations                                                                                                                                                                                                                                                    |  |
| <b>Resources</b>              | Does the cost effectiveness favour the intervention or the comparison?                                                                                                      | <ul style="list-style-type: none"> <li>○ Favours the option</li> <li>○ Probably favours the option</li> <li>● <b>Does not favour either</b></li> <li>○ Probably favours the comparison</li> <li>○ Favours the comparison</li> <li>○ Varies</li> </ul> | N/A<br>No mention of any costs associated to these recommendations                                                                                                                                                                                                                                                    |  |

|               |                                               |                                                                                                                                                                                                                                                                                                                             |  |  |
|---------------|-----------------------------------------------|-----------------------------------------------------------------------------------------------------------------------------------------------------------------------------------------------------------------------------------------------------------------------------------------------------------------------------|--|--|
| Equity        | What would be the impact on health equity?    | <ul style="list-style-type: none"> <li><input type="radio"/> Increased</li> <li><input type="radio"/> Probably increased</li> <li><input checked="" type="radio"/> <b>Uncertain</b></li> <li><input type="radio"/> Probably reduced</li> <li><input type="radio"/> Reduced</li> <li><input type="radio"/> Varies</li> </ul> |  |  |
| Acceptability | Is the option acceptable to key stakeholders? | <ul style="list-style-type: none"> <li><input type="radio"/> No</li> <li><input type="radio"/> Probably no</li> <li><input type="radio"/> Uncertain</li> <li><input checked="" type="radio"/> <b>Probably yes</b></li> <li><input type="radio"/> Yes</li> <li><input type="radio"/> Varies</li> </ul>                       |  |  |

|             |                                            |                                                                                                                                                                                                                                                                                                       |                                                                                                                                |  |
|-------------|--------------------------------------------|-------------------------------------------------------------------------------------------------------------------------------------------------------------------------------------------------------------------------------------------------------------------------------------------------------|--------------------------------------------------------------------------------------------------------------------------------|--|
| Feasibility | Is the intervention feasible to implement? | <ul style="list-style-type: none"> <li><input type="radio"/> No</li> <li><input type="radio"/> Probably no</li> <li><input type="radio"/> Uncertain</li> <li><input checked="" type="radio"/> <b>Probably yes</b></li> <li><input type="radio"/> Yes</li> <li><input type="radio"/> Varies</li> </ul> | Recommendations primarily involve questionnaires, patient perceptions and preferences. All of which are feasible to implement. |  |
|-------------|--------------------------------------------|-------------------------------------------------------------------------------------------------------------------------------------------------------------------------------------------------------------------------------------------------------------------------------------------------------|--------------------------------------------------------------------------------------------------------------------------------|--|

**Should \_\_\_ be recommended for older adults to prevent and manage falls?**

| Type of recommendation        | Strong recommendation against the intervention<br><input type="radio"/>                                                                                                                                                                                                                                                                                                                                                                                                                                                                                                                         | Weak recommendation against the intervention<br><input type="radio"/> | Conditional recommendation for either the intervention or the comparison<br><input type="radio"/> | Weak recommendation for the intervention<br><input type="radio"/> | Strong recommendation for the intervention<br><input checked="" type="radio"/> |
|-------------------------------|-------------------------------------------------------------------------------------------------------------------------------------------------------------------------------------------------------------------------------------------------------------------------------------------------------------------------------------------------------------------------------------------------------------------------------------------------------------------------------------------------------------------------------------------------------------------------------------------------|-----------------------------------------------------------------------|---------------------------------------------------------------------------------------------------|-------------------------------------------------------------------|--------------------------------------------------------------------------------|
| Recommendation                | <p>Recommendation 1: We recommend clinicians should routinely ask about falls in their interactions with older adults. GRADE: 1A</p> <p>Recommendation 2: As part of a multifactorial falls risk assessment, clinicians should enquire about the perceptions the older adult holds about falls, their causes, future risk, and how they can be prevented. GRADE: 1B.</p> <p>Recommendation 3: A care plan developed to prevent falls and related injuries should incorporate the values and preferences of the older adult. GRADE: 1B.</p>                                                      |                                                                       |                                                                                                   |                                                                   |                                                                                |
| Justification                 | <p>We conducted a scoping review<sup>8,9</sup> (specific methodology used available upon request) of the peer-reviewed literature on the perceptions older community-dwelling people hold about falls in order to: (a) identify which aspects of the topic have been studied (including both where and how); (b) describe the range of perceptions older people have about falls and their risk of falling; (c) determine, where possible, which socio-demographic factors and other personal characteristics influence these perceptions; and, (d) identify areas requiring further study.</p> |                                                                       |                                                                                                   |                                                                   |                                                                                |
| Subgroup considerations       | None                                                                                                                                                                                                                                                                                                                                                                                                                                                                                                                                                                                            |                                                                       |                                                                                                   |                                                                   |                                                                                |
| Implementation considerations | None                                                                                                                                                                                                                                                                                                                                                                                                                                                                                                                                                                                            |                                                                       |                                                                                                   |                                                                   |                                                                                |
| Monitoring and evaluation     | None                                                                                                                                                                                                                                                                                                                                                                                                                                                                                                                                                                                            |                                                                       |                                                                                                   |                                                                   |                                                                                |
| Research Priorities           | <ol style="list-style-type: none"> <li>1. Further research on the associations between perceptions about falls and socio-demographic characteristics. Work done to date indicates, for example, significant relationships between gender<sup>13,15,27,35,38,49,55,57,62</sup> and FOF.</li> <li>2. More research is needed to understand the stability and evolution of these perceptions over time, their relationships with fall outcomes, and whether they can be modified (and by what means).</li> </ol>                                                                                   |                                                                       |                                                                                                   |                                                                   |                                                                                |

- |  |                                                                                                                                                                                                                                                                                                                                                                                                                                                                                                                                                                                                                                                                                                                                                       |
|--|-------------------------------------------------------------------------------------------------------------------------------------------------------------------------------------------------------------------------------------------------------------------------------------------------------------------------------------------------------------------------------------------------------------------------------------------------------------------------------------------------------------------------------------------------------------------------------------------------------------------------------------------------------------------------------------------------------------------------------------------------------|
|  | <ol style="list-style-type: none"> <li>3. Research should extend to parts of the world where few studies been done to date (e.g., Africa, South America).</li> <li>4. Greater involvement of older people often excluded from the research done to date (e.g., those significant cognitive impairment).</li> <li>5. Systematic review of how the values and preferences of older people affect the choice and outcomes of fall prevention interventions (on-going).<sup>10</sup></li> <li>6. Further research on the roles and experiences of formal (paid) and informal (unpaid) caregivers of older people in fall prevention. An integrative review of 15 studies highlighted the complexity and importance of this issue.<sup>66</sup></li> </ol> |
|--|-------------------------------------------------------------------------------------------------------------------------------------------------------------------------------------------------------------------------------------------------------------------------------------------------------------------------------------------------------------------------------------------------------------------------------------------------------------------------------------------------------------------------------------------------------------------------------------------------------------------------------------------------------------------------------------------------------------------------------------------------------|

### References

1. Stevens JA, Ballesteros MF, Mack KA, Rudd RA, DeCaro E, Adler G. Gender differences in seeking care for falls in the aged Medicare population. *Am J Prev Med.* 2012 Jul;43(1):59-62.
2. Horton K, Dickinson A. The role of culture and diversity in the prevention of falls among older Chinese people. *Can J Aging.* 2011 Mar;30(1):57-66.
3. Loganathan A, Ng CJ, Low WY. Views and experiences of Malaysian older persons about falls and their prevention-A qualitative study. *BMC Geriatr.* 2016 May 6;16:97.
4. Robson K, Coyle J, Pope R. Exploration of older people's perceptions of behavioural factors associated with falls. *Age Ageing.* 2018 Sep 1;47(5):734-40.
5. Ballinger C, Payne S. The construction of the risk of falling among and by older people. *Ageing Soc* 2002;22:305-24.
6. Horton K. Gender and the risk of falling: a sociological approach. *J Adv Nurs.* 2007 Jan;57(1):69-76.
7. Liddle JL, Lovarini M, Clemson LM, Jang H, Willis K, Lord SR, et al. Men's perspectives on fall risk and fall prevention following participation in a group-based programme conducted at Men's Sheds, Australia. *Health Soc Care Community.* 2017 May;25(3):1118-26.
8. Hill AM, Hoffmann T, Beer C, McPhail S, Hill KD, Oliver D, et al. Falls after discharge from hospital: is there a gap between older peoples' knowledge about falls prevention strategies and the research evidence? *Gerontologist.* 2011 Oct;51(5):653-62.
9. Kim C, Armstrong MJ, Berta WB, Gagliardi AR. How to identify, incorporate and report patient preferences in clinical guidelines: A scoping review. *Health Expect.* 2020 Oct;23(5):1028-36.
10. Cao X, Hou Y, Zhang X, Xu C, Jia P, Sun X, et al. A comparative, correlate analysis and projection of global and regional life expectancy, healthy life expectancy, and their GAP: 1995-2025. *J Glob Health.* 2020 Dec;10(2):020407.
11. Peel NM. Epidemiology of falls in older age. *Can J Aging.* 2011 Mar;30(1):7-19.
12. Montero-Odasso M, van der Velde N, Alexander NB, Becker C, Blain H, Camicioli R, et al. New horizons in falls prevention and management for older adults: a global initiative. *Age Ageing.* 2021 Sep 11;50(5):1499-507.
13. Gillespie LD, Robertson MC, Gillespie WJ, Sherrington C, Gates S, Clemson LM, et al. Interventions for preventing falls in older people living in the community. *Cochrane Database Syst Rev.* 2012 Sep 12(9):CD007146.
14. Montero-Odasso MM, Kamkar N, Pieruccini-Faria F, Osman A, Sarquis-Adamson Y, Close J, et al. Evaluation of Clinical Practice Guidelines on Fall Prevention and Management for Older Adults: A Systematic Review. *JAMA Netw Open.* 2021 Dec 1;4(12):e2138911.
15. Hill KD, Day L, Haines TP. What factors influence community-dwelling older people's intent to undertake multifactorial fall prevention programs? *Clin Interv Aging.* 2014;9:2045-53.
16. Arksey H, O'Malley L. Scoping studies: towards a methodological framework. *International Journal of Social Research Methodology.* 2005;8(1):19-32.
17. Levac D, Colquhoun H, O'Brien K. Scoping studies: Advancing the methodology. *Implementation Science.* 2010;5(1):69-78.
18. Pillay J, Riva JJ, Tessier LA, Colquhoun H, Lang E, Moore AE, et al. Fall prevention interventions for older community-dwelling adults: systematic reviews on benefits, harms, and patient values and preferences. *Syst Rev.* 2021 Jan 9;10(1):18.
19. Ayton D, Morello R, Natora A, Yallop S, Barker A, Soh SE. Perceptions of falls and falls prevention interventions among Personal Alert Victoria clients. *Health Soc Care Community.* 2018 Nov;26(6):970-8.
20. Boongird C, Ross R. Views and Expectations of Community-Dwelling Thai Elderly in Reporting Falls to Their Primary Care Physicians. *J Appl Gerontol.* 2017 Apr;36(4):480-98.

21. Boyd R, Stevens JA. Falls and fear of falling: burden, beliefs and behaviours. *Age Ageing*. 2009 Jul;38(4):423-8.
22. Canever JB, Danielewicz AL, Leopoldino AAO, de Avelar NCP. Is the self-perception of the built neighborhood associated with fear of falling in community-dwelling older adults? *Arch Gerontol Geriatr*. 2021 Jul-Aug;95:104395.
23. Chang NT, Chi LY, Yang NP, Chou P. The impact of falls and fear of falling on health-related quality of life in Taiwanese elderly. *J Community Health Nurs*. 2010 Apr;27(2):84-95.
24. Chippendale T, Lee CD. Characteristics and fall experiences of older adults with and without fear of falling outdoors. *Aging Ment Health*. 2018 Jun;22(6):849-55.
25. Chippendale T, Raveis V. Knowledge, behavioral practices, and experiences of outdoor fallers: Implications for prevention programs. *Arch Gerontol Geriatr*. 2017 Sep;72:19-24.
26. Chippendale T, Boltz M. The Neighborhood Environment: Perceived Fall Risk, Resources, and Strategies for Fall Prevention. *Gerontologist*. 2015 Aug;55(4):575-83.
27. Collerton J, Kingston A, Bond J, Davies K, Eccles MP, Jagger C, et al. The personal and health service impact of falls in 85 year olds: cross-sectional findings from the Newcastle 85+ cohort study. *PLoS One*. 2012;7(3):e33078.
28. Collins CE, Chandra A, Nguyen B, Schultz K, Mathew P, Chen T, et al. The Rose-Colored Glasses of Geriatric Fall Patients: Inconsistencies Between Knowledge of Risk Factors for and Actual Causes of Falls. *Gerontol Geriatr Med*. 2020 Jan-Dec;6:2333721420967884.
29. Delbaere K, Crombez G, van Haastregt JC, Vlaeyen JW. Falls and catastrophic thoughts about falls predict mobility restriction in community-dwelling older people: A structural equation modelling approach. *Aging Ment Health*. 2009 Jul;13(4):587-92.
30. Delbaere K, Close JC, Brodaty H, Sachdev P, Lord SR. Determinants of disparities between perceived and physiological risk of falling among elderly people: cohort study. *BMJ*. 2010 Aug 18;341:c4165.
31. Dollard J, Barton C, Newbury J, Turnbull D. Falls in old age: a threat to identity. *J Clin Nurs*. 2012 Sep;21(17-18):2617-25.
32. Gardiner S, Glogowska M, Stoddart C, Pendlebury S, Lasserson D, Jackson D. Older people's experiences of falling and perceived risk of falls in the community: A narrative synthesis of qualitative research. *Int J Older People Nurs*. 2017 Dec;12(4).
33. Gill T, Taylor AW, Pengelly A. A population-based survey of factors relating to the prevalence of falls in older people. *Gerontology*. 2005 Sep-Oct;51(5):340-5.
34. Hanlin ER, Delgado-Rendon A, Lerner EB, Hargarten S, Farias R. Fall risk and prevention needs assessment in an older adult Latino population: a model community global health partnership. *Prog Community Health Partnersh*. 2013 Summer;7(2):191-9.
35. Hoang OT, Jullamate P, Piphatvanitcha N, Rosenberg E. Factors related to fear of falling among community-dwelling older adults. *J Clin Nurs*. 2017 Jan;26(1-2):68-76.
36. Horne M, Speed S, Skelton D, Todd C. What do community-dwelling Caucasian and South Asian 60-70 year olds think about exercise for fall prevention? *Age Ageing*. 2009 Jan;38(1):68-73.
37. Host D, Hendriksen C, Borup I. Older people's perception of and coping with falling, and their motivation for fall-prevention programmes. *Scand J Public Health*. 2011 Nov;39(7):742-8.
38. Howard B, Baca R, Bilger M, Cali S, Kotarski A, Parrett K, et al. Investigating older adults' expressed needs regarding falls prevention. *Physical & Occupational Therapy In Geriatrics*. 2018;36(2-3):201-20.
39. Jagnoor J, Keay L, Jaswal N, Kaur M, Ivers R. A qualitative study on the perceptions of preventing falls as a health priority among older people in Northern India. *Inj Prev*. 2014 Feb;20(1):29-34.
40. Jansen S, Schoe J, van Rijn M, Abu-Hanna A, Moll van Charante EP, van der Velde N, et al. Factors associated with recognition and prioritization for falling, and the effect on fall incidence in community dwelling older adults. *BMC Geriatr*. 2015 Dec 17;15:169.
41. Katsumata Y, Arai A, Tomimori M, Ishida K, Lee RB, Tamashiro H. Fear of falling and falls self-efficacy and their relationship to higher-level competence among community-dwelling senior men and women in Japan. *Geriatr Gerontol Int*. 2011 Jul;11(3):282-9.
42. Kilian C, Salmoni A, Ward-Griffin C, Klosock M. Perceiving falls within a family context: a focused ethnographic approach. *Can J Aging*. 2008 Winter;27(4):331-45.
43. Kim S, So WY. Prevalence and correlates of fear of falling in Korean community-dwelling elderly subjects. *Exp Gerontol*. 2013 Nov;48(11):1323-8.
44. Lach HW. Incidence and risk factors for developing fear of falling in older adults. *Public Health Nurs*. 2005 Jan-Feb;22(1):45-52.
45. Lam J, Liamputtong P, Hill K. Falls, falls prevention and the role of physiotherapy and exercise: perceptions and interpretations of Italian-born and Australian-born older persons living in Australia. *J Cross Cult Gerontol*. 2015 Jun;30(2):233-49.

46. Lee F, Mackenzie L, James C. Perceptions of older people living in the community about their fear of falling. *Disabil Rehabil.* 2008;30(23):1803-11.
47. Mackintosh S, Fryer C, Sutherland M. For falls sake: Older carers' perceptions of falls and risk factors. *The Internet Journal of Allied Health Sciences and Practice.* 2007;5(3):1-9.
48. Mahler M, Sarvimäki A. Indispensable chairs and comforting cushions: Falls and the meaning of falls in six older persons lives. *Journal of Aging Studies.* 2010;24(2):88-95.
49. Maneeprom N, Taneepanichskul S, Panza A. Falls among physically active elderly in senior housings, Bangkok, Thailand: situations and perceptions. *Clin Interv Aging.* 2018;13:2149-59.
50. Mann R, Birks Y, Hall J, Torgerson D, Watt I. Exploring the relationship between fear of falling and neuroticism: a cross-sectional study in community-dwelling women over 70. *Age Ageing.* 2006 Mar;35(2):143-7.
51. McMahan S, Talley KM, Wyman JF. Older people's perspectives on fall risk and fall prevention programs: a literature review. *Int J Older People Nurs.* 2011 Dec;6(4):289-98.
52. Patton S, Vincenzo J, Lefler L. Gender Differences in Older Adults' Perceptions of Falls and Fall Prevention. *Health Promot Pract.* 2021 May 10:15248399211009783.
53. Pereles L, Jackson R, Rosenal T, Nixon L. Listening with a narrative ear: Insights from a study of fall stories in older adults. *Can Fam Physician.* 2017 Jan;63(1):e44-e50.
54. Pohl P, Ahlgren C, Nordin E, Lundquist A, Lundin-Olsson L. Gender perspective on fear of falling using the classification of functioning as the model. *Disabil Rehabil.* 2015;37(3):214-22.
55. Roe B, Howell F, Riniotis K, Beech R, Crome P, Ong BN. Older people and falls: health status, quality of life, lifestyle, care networks, prevention and views on service use following a recent fall. *J Clin Nurs.* 2009 Aug;18(16):2261-72.
56. Shankar KN, Taylor D, Rizzo CT, Liu SW. Exploring Older Adult ED Fall Patients' Understanding of Their Fall: A Qualitative Study. *Geriatr Orthop Surg Rehabil.* 2017 Dec;8(4):231-7.
57. Shaw J, Connelly D, McWilliam C. The meaning of the experience of anticipating falling. *Ageing & Society.* 2015;35(9):1839-63.
58. Stewart J, McVittie C. Living with falls: house-bound older people's experiences of health and community care. *Eur J Ageing.* 2011 Dec;8(4):271-9.
59. Tay PKC, Chan A, Tan PJ, Wong CH. Sex Differences in Perceptions toward Falls among Older Adults Living in the Community in Singapore. *J Aging Health.* 2020 Dec;32(10):1355-62.
60. Thiamwong L. A hybrid concept analysis of fall risk appraisal: Integration of older adults' perspectives with an integrative literature review. *Nurs Forum.* 2020 Apr;55(2):190-6.
61. Thiamwong L, Suwanno J. Fear of falling and related factors in a community-based study of people 60 years and older in Thailand. *International Journal of Gerontology.* 2017;11(2):80-4.
62. Tischler L, Hobson S. Fear of falling: A qualitative study among community-dwelling older adults. *Physical & Occupational Therapy In Geriatrics.* 2005;23(4):37-53.
63. Vivrette RL, Rubenstein LZ, Martin JL, Josephson KR, Kramer BJ. Development of a fall-risk self-assessment for community-dwelling seniors. *J Aging Phys Act.* 2011 Jan;19(1):16-29.
64. Ward-Griffin C, Hobson S, Melles P, Klooseck M, Vandervoort A, Crilly R. Falls and fear of falling among community-dwelling seniors: the dynamic tension between exercising precaution and striving for independence. *Can J Aging.* 2004 Winter;23(4):307-18.
65. Zecevic AA, Salmoni AW, Speechley M, Vandervoort AA. Defining a fall and reasons for falling: comparisons among the views of seniors, health care providers, and the research literature. *Gerontologist.* 2006 Jun;46(3):367-76.
66. Zijlstra GA, van Haastregt JC, van Eijk JT, van Rossum E, Stalenhoef PA, Kempen GI. Prevalence and correlates of fear of falling, and associated avoidance of activity in the general population of community-living older people. *Age Ageing.* 2007 May;36(3):304-9.
67. Ang SGM, O'Brien AP, Wilson A. Carers' concern for older people falling at home: an integrative review. *Singapore Med J.* 2020 May;61(5):272-80.

## Working Group 12: Concerns about Falling and Falls

### Recommendations for Working Group 12: Concerns about Falling and Falls

**Recommendation 1 (Assessment).** We recommend including an evaluation of concerns about falling in a multifactorial falls risk assessment of older adults. **GRADE: 1B**

**Recommendation 2 (Assessment).** We recommend using a standardised instrument to evaluate concerns about falling such as the Falls Efficacy Scale International (FES-I) or Short FES-I in community-dwelling older adults. **GRADE: 1A**

**Recommendation 3 (Assessment).** We recommend using the FES-I or especially the Short FES-I for assessing concerns about falling in acute care hospitals or long-term care facilities. **GRADE: 1B**

|                                |                                                                                                 |                                                                                                                                                                                                                                                                        |                                      |                                                |
|--------------------------------|-------------------------------------------------------------------------------------------------|------------------------------------------------------------------------------------------------------------------------------------------------------------------------------------------------------------------------------------------------------------------------|--------------------------------------|------------------------------------------------|
| <b>Population:</b>             | Older adults                                                                                    | <i>Objective: Step 1: To make evidence-based recommendations through critical appraisal of the existing evidence (systematic review and meta-analysis) on assessments of Concerns about falling as part of a multifactorial falls risk assessment of older people.</i> |                                      |                                                |
| <b>Intervention:</b>           | FES-I & Short FES-I                                                                             |                                                                                                                                                                                                                                                                        |                                      |                                                |
| <b>Comparison:</b>             | Consistency                                                                                     |                                                                                                                                                                                                                                                                        |                                      |                                                |
| <b>Main outcomes:</b>          | Concerns about falling                                                                          |                                                                                                                                                                                                                                                                        |                                      |                                                |
| <b>Setting:</b>                | Community-dwelling older adults (1A), acute care hospitals (1B), long-term care facilities (1B) |                                                                                                                                                                                                                                                                        |                                      |                                                |
| <b>Perspective:</b>            | Population                                                                                      |                                                                                                                                                                                                                                                                        |                                      |                                                |
| <b>Decision Domain</b>         |                                                                                                 | <b>Judgements</b>                                                                                                                                                                                                                                                      | <b>Research Evidence</b>             | <b>Additional Considerations /Explanations</b> |
| <b>Priority of the Problem</b> | Is the problem a priority?                                                                      | <ul style="list-style-type: none"> <li>○ No</li> <li>○ Probably no</li> <li>○ Uncertain</li> <li>○ Probably yes</li> <li>● <b>Yes</b></li> <li>○ Varies</li> </ul>                                                                                                     | See 'Overview of the Problem' above. |                                                |



|                                                 |                                                                                                                                              |                                                                                                                                                                                                                                                                                                         |                                                              |                            |                                          |       |
|-------------------------------------------------|----------------------------------------------------------------------------------------------------------------------------------------------|---------------------------------------------------------------------------------------------------------------------------------------------------------------------------------------------------------------------------------------------------------------------------------------------------------|--------------------------------------------------------------|----------------------------|------------------------------------------|-------|
| <b>Benefits and harms</b><br>(see below)        | Is there important uncertainty or variability in how much patients, researchers, clinicians and stake holders value the main outcomes?       | <ul style="list-style-type: none"> <li>○ Important uncertainty or variability</li> <li>○ Possibly important uncertainty or variability</li> <li>● <b>Probably no important uncertainty of variability</b></li> <li>○ No important uncertainty of variability</li> <li>○ No known undesirable</li> </ul> | <b>Relative importance of the main outcomes of interest:</b> |                            |                                          | None. |
|                                                 |                                                                                                                                              |                                                                                                                                                                                                                                                                                                         | <b>Outcome</b>                                               | <b>Relative Importance</b> | <b>Certainty of the evidence (GRADE)</b> |       |
|                                                 |                                                                                                                                              |                                                                                                                                                                                                                                                                                                         | Concerns about falling                                       | Critical                   | ⊕⊕⊕○<br>MODERATE                         |       |
|                                                 |                                                                                                                                              |                                                                                                                                                                                                                                                                                                         | Falls                                                        | Critical                   | ⊕⊕⊕○<br>MODERATE                         |       |
|                                                 |                                                                                                                                              |                                                                                                                                                                                                                                                                                                         | FES-I                                                        | Critical                   | ⊕⊕⊕○<br>MODERATE                         |       |
|                                                 |                                                                                                                                              |                                                                                                                                                                                                                                                                                                         | Short FES-I                                                  | Critical                   | ⊕⊕⊕○<br>MODERATE                         |       |
|                                                 |                                                                                                                                              |                                                                                                                                                                                                                                                                                                         | Icon FES                                                     | Important but not critical | ⊕⊕⊕○<br>MODERATE                         |       |
|                                                 |                                                                                                                                              |                                                                                                                                                                                                                                                                                                         | Short Icon FES                                               | Important but not critical | ⊕⊕○○<br>LOW                              |       |
|                                                 |                                                                                                                                              |                                                                                                                                                                                                                                                                                                         |                                                              |                            | ○○○○<br>MODERATE                         |       |
|                                                 |                                                                                                                                              |                                                                                                                                                                                                                                                                                                         |                                                              |                            | ○○○○<br>MODERATE                         |       |
| What is the overall certainty of this evidence? | <ul style="list-style-type: none"> <li>○ No studies</li> <li>○ Very low</li> <li>○ Low</li> <li>● <b>Moderate</b></li> <li>○ High</li> </ul> |                                                                                                                                                                                                                                                                                                         |                                                              |                            |                                          |       |

|                                                                                                         |                                                                                                                                                                                                                                                                                 |                                            |                       |     |                                                                                                                                                                                                                                                                                       |                                                                                                               |
|---------------------------------------------------------------------------------------------------------|---------------------------------------------------------------------------------------------------------------------------------------------------------------------------------------------------------------------------------------------------------------------------------|--------------------------------------------|-----------------------|-----|---------------------------------------------------------------------------------------------------------------------------------------------------------------------------------------------------------------------------------------------------------------------------------------|---------------------------------------------------------------------------------------------------------------|
| How substantial are the desirable anticipated effects of the intervention?                              | <ul style="list-style-type: none"> <li>○ Large</li> <li>○ Moderate</li> <li>○ Small</li> <li>○ Trivial</li> <li>○ Varies</li> <li>● <b>Not applicable</b></li> </ul>                                                                                                            | <b>Summary of findings (GRADE): 1A, 1B</b> |                       |     | *Test-retest<br>**Inter-rater Reliability<br>***Only 1 study<br><br>McGarrigle L, Yang Y, Lasrado R, et al. A systematic review and meta-analysis of the psychometric properties of four variants of the Falls Efficacy Scale-International (FES-I). <i>Paper in preparation 2022</i> |                                                                                                               |
|                                                                                                         |                                                                                                                                                                                                                                                                                 | <b>Outcome</b>                             | <b>Nº of patients</b> |     |                                                                                                                                                                                                                                                                                       | <b>Effect</b>                                                                                                 |
| How substantial are the undesirable anticipated effects of the intervention?                            | <ul style="list-style-type: none"> <li>○ Trivial</li> <li>○ Small</li> <li>○ Moderate</li> <li>○ Large</li> <li>○ Varies</li> <li>● <b>Not applicable</b></li> </ul>                                                                                                            | FES-I*                                     | 1169                  | N/A | Pooled ICC: 0.94<br>(0.91 – 0.96)                                                                                                                                                                                                                                                     | It is reliable to assess concerns about falling or falls efficacy, however not directly related to fall risk. |
|                                                                                                         |                                                                                                                                                                                                                                                                                 | Short FES-I*                               | 154                   | N/A | Pooled ICC: 0.90<br>(0.87 – 0.94)                                                                                                                                                                                                                                                     |                                                                                                               |
|                                                                                                         |                                                                                                                                                                                                                                                                                 | Icon FES*                                  | 150                   | N/A | Pooled ICC: 0.90<br>(0.83 – 0.94)                                                                                                                                                                                                                                                     |                                                                                                               |
| Does the balance between desirable effects and undesirable effects favour the option of the comparison? | <ul style="list-style-type: none"> <li>○ Favours the option</li> <li>○ Probably favours the option</li> <li>○ Does not favour either</li> <li>○ Probably favours the comparison</li> <li>○ Favours the comparison</li> <li>○ Varies</li> <li>● <b>Not applicable</b></li> </ul> | Short Icon FES*                            | 201                   | N/A | Pooled ICC: 0.93<br>(0.90 – 0.95) &<br>0.92<br>(0.89 – 0.95)                                                                                                                                                                                                                          |                                                                                                               |
|                                                                                                         |                                                                                                                                                                                                                                                                                 | FES-I**                                    | 402                   | N/A | Pooled ICC: 0.93<br>(0.88 – 0.98)                                                                                                                                                                                                                                                     |                                                                                                               |
|                                                                                                         |                                                                                                                                                                                                                                                                                 | Short FES-I**                              | 31                    | N/A | ICC***: 0.93<br>(0.86 – 0.96)                                                                                                                                                                                                                                                         |                                                                                                               |

|                                                                        |                                                                                                                                                                             |                                                                                                                                                                                                                                                                             |                                                                                                                                              |                                        |
|------------------------------------------------------------------------|-----------------------------------------------------------------------------------------------------------------------------------------------------------------------------|-----------------------------------------------------------------------------------------------------------------------------------------------------------------------------------------------------------------------------------------------------------------------------|----------------------------------------------------------------------------------------------------------------------------------------------|----------------------------------------|
| Values and preferences                                                 | Is there similarity about how much patients, researchers, clinicians and stake holders value the main Outcomes? Also include adverse effects and burden of the intervention | <ul style="list-style-type: none"> <li>○ No</li> <li>○ Probably no</li> <li>○ Uncertain</li> <li>● <b>Uncertain</b></li> <li>○ Probably yes</li> <li>○ Yes</li> <li>○ Varies</li> </ul>                                                                                     | Recommendation is not an intervention.                                                                                                       |                                        |
|                                                                        | Resources                                                                                                                                                                   | What is the certainty of the evidence of resources requirements (costs)?                                                                                                                                                                                                    | <ul style="list-style-type: none"> <li>● <b>No studies</b></li> <li>○ Very low</li> <li>○ Low</li> <li>○ Moderate</li> <li>○ High</li> </ul> | Recommendation is not an intervention. |
| Does the cost effectiveness favour the intervention or the comparison? |                                                                                                                                                                             | <ul style="list-style-type: none"> <li>● <b>No studies</b></li> <li>○ Favours the option</li> <li>○ Probably favours the option</li> <li>○ Does not favour either</li> <li>○ Probably favours the comparison</li> <li>○ Favours the comparison</li> <li>○ Varies</li> </ul> | Recommendation is not an intervention.                                                                                                       |                                        |

|               |                                               |                                                                                                                                                                                                                                                                                                                             |     |  |
|---------------|-----------------------------------------------|-----------------------------------------------------------------------------------------------------------------------------------------------------------------------------------------------------------------------------------------------------------------------------------------------------------------------------|-----|--|
| Equity        | What would be the impact on health equity?    | <ul style="list-style-type: none"> <li><input type="radio"/> Increased</li> <li><input type="radio"/> Probably increased</li> <li><input checked="" type="radio"/> <b>Uncertain</b></li> <li><input type="radio"/> Probably reduced</li> <li><input type="radio"/> Reduced</li> <li><input type="radio"/> Varies</li> </ul> | N/A |  |
| Acceptability | Is the option acceptable to key stakeholders? | <ul style="list-style-type: none"> <li><input type="radio"/> No</li> <li><input type="radio"/> Probably no</li> <li><input type="radio"/> Uncertain</li> <li><input type="radio"/> Probably yes</li> <li><input checked="" type="radio"/> <b>Yes</b></li> <li><input type="radio"/> Varies</li> </ul>                       |     |  |

|             |                                            |                                                                                                                                                             |                                        |  |
|-------------|--------------------------------------------|-------------------------------------------------------------------------------------------------------------------------------------------------------------|----------------------------------------|--|
| Feasibility | Is the intervention feasible to implement? | <ul style="list-style-type: none"> <li>○ No</li> <li>○ Probably no</li> <li>○ Uncertain</li> <li>○ Probably yes</li> <li>● Yes</li> <li>○ Varies</li> </ul> | Recommendation is not an intervention. |  |
|-------------|--------------------------------------------|-------------------------------------------------------------------------------------------------------------------------------------------------------------|----------------------------------------|--|

**Should the FES-I or short FES-I be recommended for assessing concerns about falling in all settings?**

| Type of recommendation        | Strong recommendation against the intervention<br>○                                                                                                                                                                                                                                                                                                                                                                                                                                                                                                                                                                                          | Weak recommendation against the intervention<br>○ | Conditional recommendation for either the intervention or the comparison<br>○ | Weak recommendation for the intervention<br>○ | Strong recommendation for the intervention<br>● |
|-------------------------------|----------------------------------------------------------------------------------------------------------------------------------------------------------------------------------------------------------------------------------------------------------------------------------------------------------------------------------------------------------------------------------------------------------------------------------------------------------------------------------------------------------------------------------------------------------------------------------------------------------------------------------------------|---------------------------------------------------|-------------------------------------------------------------------------------|-----------------------------------------------|-------------------------------------------------|
| Recommendation                | <p>Recommendation 1: We recommend including an evaluation of concern about falling in a multifactorial falls risk assessment of older adults. GRADE: 1B</p> <p>Recommendation 2: We recommend using a standardised instrument to evaluate concerns about falling such as the Falls Efficacy Scale International (FES-I) or Short FES-I in community-dwelling older adults. GRADE: 1A</p> <p>Recommendation 3: We recommend using the FES-I or especially the Short FES-I for assessing concerns about falling in acute care hospitals or long-term care facilities. GRADE: 1B</p>                                                            |                                                   |                                                                               |                                               |                                                 |
| Justification                 | <p>Evidence for our recommendations on the best tool to evaluate concerns about falling and best interventions to address concerns about falling have emerged from a range of systematic reviews and meta-analyses. There is at best moderate evidence that concerns about falling tools is predictive of future falls, which is not supported by systematic review evidence. Our expert opinion is that concerns about falling is unlikely to be the primary cause of falls in older people, and that the relationship between concerns about falling tools and future falls is likely dependent on a person's physiological fall risk.</p> |                                                   |                                                                               |                                               |                                                 |
| Subgroup considerations       | <p>FES-I and Short FES-I are important measures in the multifactorial falls risk assessment of community-dwelling older people who have fallen and/or are at risk for falling for the purposes of developing risk profiles and informing management. FES-I and Short FES-I have also been validated in people with mild to moderate cognitive impairment and early stage dementia, as well as other conditions associated with an increased risk of falls (e.g. Stroke, MS, and Parkinson's disease). Nonetheless, further research will strengthen our understanding.</p>                                                                   |                                                   |                                                                               |                                               |                                                 |
| Implementation considerations | <p>FES-I is a suitable test that can easily be implemented in the standard clinical evaluation of older people, due to its ease and efficiency of administration, low cost, and reliability.</p>                                                                                                                                                                                                                                                                                                                                                                                                                                             |                                                   |                                                                               |                                               |                                                 |
| Monitoring and evaluation     | <p>For monitoring the effectiveness of interventions to reduce concerns about falling, it is important to use validated scales. A recent systematic review on the measurement properties of the FES-I found sufficient evidence for the responsiveness of the FES-I. The majority of effect sizes reported across five studies supported pre-defined hypotheses regarding the expected magnitude of change, suggesting its usefulness as a monitoring and evaluation tool. There is inconsistent evidence regarding the responsiveness of the Short FES-I.</p>                                                                               |                                                   |                                                                               |                                               |                                                 |

|                     |                                                                                                                                                                                                                                                                                                                                                                                                                                                                                                                                                                                                                                                                                                                                                                                                                                                                                                                                                                                                                                                                                                                                                               |
|---------------------|---------------------------------------------------------------------------------------------------------------------------------------------------------------------------------------------------------------------------------------------------------------------------------------------------------------------------------------------------------------------------------------------------------------------------------------------------------------------------------------------------------------------------------------------------------------------------------------------------------------------------------------------------------------------------------------------------------------------------------------------------------------------------------------------------------------------------------------------------------------------------------------------------------------------------------------------------------------------------------------------------------------------------------------------------------------------------------------------------------------------------------------------------------------|
| Research Priorities | <p>1. Preferred concerns about falling assessment tools need to be defined for different settings (e.g., community, outpatient clinic, acute care, long term care), older people with specific clinical characteristics (e.g., cognitive impairment, stroke, Parkinson’s disease) and different levels of functional status. A review of FES-I measurement characteristics in sub-populations would be a timely first step. 2. Meaningful cut-off points for FES-I need to be confirmed across larger samples of community dwelling older people and need to be established for older people with specific clinical characteristics (e.g., cognitive impairment, stroke, Parkinson’s disease) and different levels of functional status. 3. Further research is also recommended to establish the minimally important and clinically meaningful change of the FES-I. 4. The predictive ability of concerns about falling for falls, injurious falls, and restriction of daily activities need to be confirmed, as well as the mediating effect of related constructs (e.g., anxiety, depression, social isolation, self-efficacy) in these relationships.</p> |
|---------------------|---------------------------------------------------------------------------------------------------------------------------------------------------------------------------------------------------------------------------------------------------------------------------------------------------------------------------------------------------------------------------------------------------------------------------------------------------------------------------------------------------------------------------------------------------------------------------------------------------------------------------------------------------------------------------------------------------------------------------------------------------------------------------------------------------------------------------------------------------------------------------------------------------------------------------------------------------------------------------------------------------------------------------------------------------------------------------------------------------------------------------------------------------------------|

## Recommendations for Working Group 12: Concerns about falling

**Recommendation 4 (Assessment). We recommend exercise, cognitive behavioural therapy and/or occupational therapy (as part of a multidisciplinary approach) to reduce concerns about falling in community-dwelling older adults. GRADE: 1B**

| <b>Population:</b>             | Older adults                                                | <i>Objective: Step 2: To make evidence-based recommendations through critical appraisal of the existing evidence (systematic review and meta-analysis) on intervention for concerns about falling as part of a multidisciplinary approach.</i> |                                      |                                         |
|--------------------------------|-------------------------------------------------------------|------------------------------------------------------------------------------------------------------------------------------------------------------------------------------------------------------------------------------------------------|--------------------------------------|-----------------------------------------|
| <b>Intervention:</b>           | Multidisciplinary approach to reduce concerns about falling |                                                                                                                                                                                                                                                |                                      |                                         |
| <b>Comparison:</b>             | Usual care                                                  |                                                                                                                                                                                                                                                |                                      |                                         |
| <b>Main outcomes:</b>          | Concerns about falling, falls                               |                                                                                                                                                                                                                                                |                                      |                                         |
| <b>Setting:</b>                | Community-dwelling older adults                             |                                                                                                                                                                                                                                                |                                      |                                         |
| <b>Perspective:</b>            | Population                                                  |                                                                                                                                                                                                                                                |                                      |                                         |
| Decision Domain                |                                                             | Judgements                                                                                                                                                                                                                                     | Research Evidence                    | Additional Considerations /Explanations |
| <b>Priority of the Problem</b> | Is the problem a priority?                                  | <ul style="list-style-type: none"> <li>○ No</li> <li>○ Probably no</li> <li>○ Uncertain</li> <li>○ Probably yes</li> <li>● <b>Yes</b></li> <li>○ Varies</li> </ul>                                                                             | See 'Overview of the Problem' above. |                                         |

|                                                 |                                                                                                                                              |                                                                                                                                                                                                                                                                                                         |                                                              |                            |                                          |       |
|-------------------------------------------------|----------------------------------------------------------------------------------------------------------------------------------------------|---------------------------------------------------------------------------------------------------------------------------------------------------------------------------------------------------------------------------------------------------------------------------------------------------------|--------------------------------------------------------------|----------------------------|------------------------------------------|-------|
| <b>Benefits and harms</b><br>(see below)        | Is there important uncertainty or variability in how much patients, researchers, clinicians and stake holders value the main outcomes?       | <ul style="list-style-type: none"> <li>○ Important uncertainty or variability</li> <li>○ Possibly important uncertainty or variability</li> <li>● <b>Probably no important uncertainty of variability</b></li> <li>○ No important uncertainty of variability</li> <li>○ No known undesirable</li> </ul> | <b>Relative importance of the main outcomes of interest:</b> |                            |                                          | None. |
|                                                 |                                                                                                                                              |                                                                                                                                                                                                                                                                                                         | <b>Outcome</b>                                               | <b>Relative Importance</b> | <b>Certainty of the evidence (GRADE)</b> |       |
|                                                 |                                                                                                                                              |                                                                                                                                                                                                                                                                                                         | Concerns about falling                                       | Important                  | ⊕⊕⊕○<br>MODERATE                         |       |
|                                                 |                                                                                                                                              |                                                                                                                                                                                                                                                                                                         | Falls                                                        | Critical                   | ⊕⊕⊕○<br>MODERATE                         |       |
|                                                 |                                                                                                                                              |                                                                                                                                                                                                                                                                                                         |                                                              |                            | ○○○○<br>MODERATE                         |       |
|                                                 |                                                                                                                                              |                                                                                                                                                                                                                                                                                                         |                                                              |                            | ○○○○<br>MODERATE                         |       |
|                                                 |                                                                                                                                              |                                                                                                                                                                                                                                                                                                         |                                                              |                            | ○○○○<br>MODERATE                         |       |
|                                                 |                                                                                                                                              |                                                                                                                                                                                                                                                                                                         |                                                              |                            | ○○○○<br>MODERATE                         |       |
|                                                 |                                                                                                                                              |                                                                                                                                                                                                                                                                                                         |                                                              |                            | ○○○○<br>MODERATE                         |       |
|                                                 |                                                                                                                                              |                                                                                                                                                                                                                                                                                                         |                                                              |                            | ○○○○<br>MODERATE                         |       |
| What is the overall certainty of this evidence? | <ul style="list-style-type: none"> <li>○ No studies</li> <li>○ Very low</li> <li>○ Low</li> <li>● <b>Moderate</b></li> <li>○ High</li> </ul> |                                                                                                                                                                                                                                                                                                         |                                                              |                            |                                          |       |



|                                                                                                         |                                                                                                                                                                                                                                                       |                                                                                         |                                  |      |                                                                                                                                                                    |                                                                                                                                                                                                                                                                                 |
|---------------------------------------------------------------------------------------------------------|-------------------------------------------------------------------------------------------------------------------------------------------------------------------------------------------------------------------------------------------------------|-----------------------------------------------------------------------------------------|----------------------------------|------|--------------------------------------------------------------------------------------------------------------------------------------------------------------------|---------------------------------------------------------------------------------------------------------------------------------------------------------------------------------------------------------------------------------------------------------------------------------|
| How substantial are the desirable anticipated effects of the intervention?                              | <ul style="list-style-type: none"> <li>○ Large</li> <li>○ Moderate</li> <li>● <b>Small</b></li> <li>○ Trivial</li> <li>○ Varies</li> <li>○ Don't know</li> </ul>                                                                                      | <b>Summary of findings (GRADE): 1B</b>                                                  |                                  |      | Physical intervention was more greatly associated with a reduction in concerns about falling, whereas written interventions or tailoring were largely ineffective. |                                                                                                                                                                                                                                                                                 |
|                                                                                                         |                                                                                                                                                                                                                                                       | <b>Outcome</b>                                                                          | <b>N<sub>o</sub> of patients</b> |      |                                                                                                                                                                    | <b>Effect</b>                                                                                                                                                                                                                                                                   |
| How substantial are the undesirable anticipated effects of the intervention?                            | <ul style="list-style-type: none"> <li>● <b>Trivial</b></li> <li>○ Small</li> <li>○ Moderate</li> <li>○ Large</li> <li>○ Varies</li> <li>○ Don't know</li> </ul>                                                                                      | Reduced concerns about falling (Holistic exercise) <sup>4</sup>                         |                                  |      | SMD = -0.823<br>(-1.255, -0.392)                                                                                                                                   | <p>It is reliable for interventions can reduce concerns about falling and improve falls efficacy, however it is not directly associated to risk of falls.</p> <p>* Immediately postintervention<br/> ** ≤ 6 months postintervention<br/> *** &gt; 6 months postintervention</p> |
|                                                                                                         |                                                                                                                                                                                                                                                       | Reduced concerns about falling (cognitive behavioral therapy) <sup>5</sup>              | 1644                             | 1521 | SMD = -0.28<br>(-0.35, -0.21) *<br>I <sup>2</sup> = 36%                                                                                                            |                                                                                                                                                                                                                                                                                 |
|                                                                                                         |                                                                                                                                                                                                                                                       |                                                                                         | 701                              | 659  | SMD = -0.32<br>(-0.49, -0.15) **<br>I <sup>2</sup> = 50%                                                                                                           |                                                                                                                                                                                                                                                                                 |
|                                                                                                         |                                                                                                                                                                                                                                                       |                                                                                         | 704                              | 699  | SMD = -0.30<br>(-0.45, -0.14) ***<br>I <sup>2</sup> = 50%                                                                                                          |                                                                                                                                                                                                                                                                                 |
| Does the balance between desirable effects and undesirable effects favour the option of the comparison? | <ul style="list-style-type: none"> <li>○ Favours the option</li> <li>● <b>Probably favours the option</b></li> <li>○ Does not favour either</li> <li>○ Probably favours the comparison</li> <li>○ Favours the comparison</li> <li>○ Varies</li> </ul> | Immediate effect on concerns about falling (cognitive behavioural therapy) <sup>6</sup> |                                  |      | SMD = 0.334<br>(0.206, 0.462)<br>I <sup>2</sup> = 0%                                                                                                               |                                                                                                                                                                                                                                                                                 |
|                                                                                                         |                                                                                                                                                                                                                                                       | Reduced concerns about falling (Occupational therapy) <sup>7</sup>                      |                                  |      | SMD = -0.17<br>(-0.29, -0.05)<br>I <sup>2</sup> = 0%                                                                                                               |                                                                                                                                                                                                                                                                                 |
|                                                                                                         |                                                                                                                                                                                                                                                       |                                                                                         |                                  |      |                                                                                                                                                                    |                                                                                                                                                                                                                                                                                 |

|                        |                                                                                                                                                                                |                                                                                                                                                                                                                                                                             |                                                    |  |
|------------------------|--------------------------------------------------------------------------------------------------------------------------------------------------------------------------------|-----------------------------------------------------------------------------------------------------------------------------------------------------------------------------------------------------------------------------------------------------------------------------|----------------------------------------------------|--|
| Values and preferences | Is there similarity about how much patients, researchers, clinicians and stake holders value the main Outcomes?<br>Also include adverse effects and burden of the intervention | <ul style="list-style-type: none"> <li>○ No</li> <li>○ Probably no</li> <li>○ Uncertain</li> <li>● <b>Probably yes</b></li> <li>○ Yes</li> <li>○ Varies</li> </ul>                                                                                                          |                                                    |  |
| Resources              | What is the certainty of the evidence of resources requirements (costs)?                                                                                                       | <ul style="list-style-type: none"> <li>● <b>No studies</b></li> <li>○ Very low</li> <li>○ Low</li> <li>○ Moderate</li> <li>○ High</li> </ul>                                                                                                                                | No mention of associated cost for the intervention |  |
|                        | Does the cost effectiveness favour the intervention or the comparison?                                                                                                         | <ul style="list-style-type: none"> <li>● <b>No studies</b></li> <li>○ Favours the option</li> <li>○ Probably favours the option</li> <li>○ Does not favour either</li> <li>○ Probably favours the comparison</li> <li>○ Favours the comparison</li> <li>○ Varies</li> </ul> |                                                    |  |

|               |                                               |                                                                                                                                                                                                                                                                                                                             |                                                                   |  |
|---------------|-----------------------------------------------|-----------------------------------------------------------------------------------------------------------------------------------------------------------------------------------------------------------------------------------------------------------------------------------------------------------------------------|-------------------------------------------------------------------|--|
| Equity        | What would be the impact on health equity?    | <ul style="list-style-type: none"> <li><input type="radio"/> Increased</li> <li><input type="radio"/> Probably increased</li> <li><input checked="" type="radio"/> <b>Uncertain</b></li> <li><input type="radio"/> Probably reduced</li> <li><input type="radio"/> Reduced</li> <li><input type="radio"/> Varies</li> </ul> | No mention on the impacts this intervention has on health equity. |  |
| Acceptability | Is the option acceptable to key stakeholders? | <ul style="list-style-type: none"> <li><input type="radio"/> No</li> <li><input type="radio"/> Probably no</li> <li><input type="radio"/> Uncertain</li> <li><input checked="" type="radio"/> <b>Probably yes</b></li> <li><input type="radio"/> Yes</li> <li><input type="radio"/> Varies</li> </ul>                       |                                                                   |  |

|                    |                                                                                                                                                                                                                                                             |                                                                                                                                                                    |  |  |
|--------------------|-------------------------------------------------------------------------------------------------------------------------------------------------------------------------------------------------------------------------------------------------------------|--------------------------------------------------------------------------------------------------------------------------------------------------------------------|--|--|
| <b>Feasibility</b> | Is the intervention feasible to implement?                                                                                                                                                                                                                  | <ul style="list-style-type: none"> <li>○ No</li> <li>○ Probably no</li> <li>○ Uncertain</li> <li>● <b>Probably yes</b></li> <li>○ Yes</li> <li>○ Varies</li> </ul> |  |  |
|                    | <b>Should exercise, cognitive behavioral therapy and/or occupational therapy (as part of a multidisciplinary approach) to reduce concerns about falling in community-dwelling older people be recommended for older adults to prevent and manage falls?</b> |                                                                                                                                                                    |  |  |

| Type of recommendation        | Strong recommendation against the intervention<br>○                                                                                                                                                                                                                                                                                                                                                                                                                                                                                                                                                                                   | Weak recommendation against the intervention<br>○ | Conditional recommendation for either the intervention or the comparison<br>○ | Weak recommendation for the intervention<br>○ | Strong recommendation for the intervention<br>● |
|-------------------------------|---------------------------------------------------------------------------------------------------------------------------------------------------------------------------------------------------------------------------------------------------------------------------------------------------------------------------------------------------------------------------------------------------------------------------------------------------------------------------------------------------------------------------------------------------------------------------------------------------------------------------------------|---------------------------------------------------|-------------------------------------------------------------------------------|-----------------------------------------------|-------------------------------------------------|
| Recommendation                | Recommendation 4: We recommend exercise, cognitive behavioural therapy and/or occupational therapy (as part of a multidisciplinary approach) to reduce concerns about falling in community-dwelling older adults. GRADE: 1B                                                                                                                                                                                                                                                                                                                                                                                                           |                                                   |                                                                               |                                               |                                                 |
| Justification                 | Evidence for our recommendations on the best tool to evaluate concerns about falling and best interventions to address concerns about falling have emerged from a range of systematic reviews and meta-analyses. There is at best moderate evidence that concerns about falling tools is predictive of future falls, which is not supported by systematic review evidence. Our expert opinion is that concerns about falling is unlikely to be the primary cause of falls in older people, and that the relationship between concerns about falling tools and future falls is likely dependent on a person's physiological fall risk. |                                                   |                                                                               |                                               |                                                 |
| Subgroup considerations       | Concerns about falling should be managed where possible through a multidisciplinary fall prevention approach that includes exercise, cognitive behavioral therapy and/or occupational therapy interventions. Most studies have included exercise and were conducted in community settings. <sup>3 4</sup> There is insufficient evidence to provide insight whether a certain subgroup might be more or less likely to benefit from these interventions.                                                                                                                                                                              |                                                   |                                                                               |                                               |                                                 |
| Implementation considerations | Older people who present with concerns about falling should be offered an exercise program as a minimum, but ideally as part of a multidisciplinary approach that might also include cognitive behavioral therapy and/or occupational therapy interventions.                                                                                                                                                                                                                                                                                                                                                                          |                                                   |                                                                               |                                               |                                                 |
| Monitoring and evaluation     | For monitoring the effectiveness of interventions to reduce concerns about falling, it is important to use validated scales. A recent systematic review on the measurement properties of the FES-I found sufficient evidence for the responsiveness of the FES-I. <sup>1</sup> The majority of effect sizes reported across eight studies supported pre-defined hypotheses regarding the expected magnitude of change, suggesting its usefulness as a monitoring and evaluation tool. There is inconsistent evidence regarding the responsiveness of the Short FES-I.                                                                 |                                                   |                                                                               |                                               |                                                 |

## References

1. McGarrigle L, Yang Y, Lasrado R, Gittins M, C. T. A systematic review and meta-analysis of the psychometric properties of four variants of the Falls Efficacy Scale-International (FES-I). . Paper in preparation. 2022.
2. Kendrick D, Kumar A, Carpenter H, Zijlstra GA, Skelton DA, Cook JR, et al. Exercise for reducing fear of falling in older people living in the community. *The Cochrane database of systematic reviews*. 2014 Nov 28;2014(11):Cd009848.
3. Kruisbrink M, Crutzen R, Kempen GIJM, Delbaere K, Ambergen T, Cheung KL, et al. Disentangling interventions to reduce fear of falling in community-dwelling older people: a systematic review and meta-analysis of intervention components. *Disability and Rehabilitation*. 2021:1-11.
4. Kruisbrink M, Delbaere K, Kempen GIJM, Crutzen R, Ambergen T, Cheung K-L, et al. Intervention Characteristics Associated With a Reduction in Fear of Falling Among Community-Dwelling Older People: A Systematic Review and Meta-analysis of Randomized Controlled Trials. *Gerontologist*. 2021;61(6):e269-e82.
5. Chua CHM, Jiang Y, Lim DS, Wu VX, Wang W. Effectiveness of cognitive behaviour therapy-based multicomponent interventions on fear of falling among community-dwelling older adults: A systematic review and meta-analysis. *Journal of Advanced Nursing*. [<https://doi.org/10.1111/jan.14150>]. 2019 2019/12/01;75(12):3299-315.
6. Liu T-W, Ng GYF, Chung RCK, Ng SSM. Cognitive behavioural therapy for fear of falling and balance among older people: a systematic review and meta-analysis. *Age and Ageing*. 2018;47(4):520-7.
7. De Coninck L, Bekkering GE, Bouckaert L, Declercq A, Graff MJL, Aertgeerts B. Home- and Community-Based Occupational Therapy Improves Functioning in Frail Older People: A Systematic Review. *J Am Geriatr Soc*. 2017;65(8):1863-9.
8. Adamczewska N, Nyman SR. A New Approach to Fear of Falls From Connections With the Posttraumatic Stress Disorder Literature. *Gerontology & geriatric medicine*. 2018;4:2333721418796238.
9. Hughes CC, Kneebone II, Jones F, Brady B. A theoretical and empirical review of psychological factors associated with falls-related psychological concerns in community-dwelling older people. *International Psychogeriatrics*. 2015;27(7):1071-87.
10. Yardley L, Beyer N, Hauer K, Kempen G, Piot-Ziegler C, Todd C. Development and initial validation of the Falls Efficacy Scale-International (FES-I). *Age and Ageing*. 2005;34(6):614-9.
11. Tinetti ME, Richman D, Powell L. Falls Efficacy as a Measure of Fear of Falling. *Journal of Gerontology*. 1990;45(6):P239-P43.
12. Scheffer AC, Schuurmans MJ, van Dijk N, van der Hooft T, de Rooij SE. Fear of falling: measurement strategy, prevalence, risk factors and consequences among older persons. *Age and Ageing*. 2008;37(1):19-24.
13. Australian Commission on Safety and Quality in Health Care. Preventing Falls and Harm from Falls in Older People: Best Practice guidelines for Australian Hospitals, Residential Aged Care Facilities and Community Care 2009 [20 October 2019].
14. Beauchet O, Dubost V, Revel-Delhom C, Berrut G, Belmin J. How to manage recurrent falls in clinical practice: Guidelines of the French society of geriatrics and gerontology. *The journal of nutrition, health & aging*. 2011 2011/01/01;15(1):79-84.
15. Registered Nurses' Association of Ontario. Preventing Falls and Reducing Injury from Falls (4th ed.). Toronto, ON: 2017.
16. Moreland J, Richardson J, Chan DH, O'Neill J, Bellissimo A, Grum RM, et al. Evidence-Based Guidelines for the Secondary Prevention of Falls in Older Adults. *Gerontology*. 2003;49(2):93-116.
17. American Geriatrics Society, British Geriatrics Society, American Academy of Orthopedic Surgeons Panel on Falls Prevention. Guideline for the Prevention of Falls in Older Persons. *J Am Geriatr Soc*. 2001;49(5):664-72.
18. Jung D, Shin S, Kim H. A fall prevention guideline for older adults living in long-term care facilities. *International nursing review*. 2014;61(4):525-33.
19. Royal Australian College of General Practitioners. Guidelines for preventive activities in general practice: 9th edition. Melbourne: Guidelines for preventative activities in general practice.: 2016.
20. Kim K-I, Jung H-K, Kim CO, Kim S-K, Cho H-H, Kim DY, et al. Evidence-based guidelines for fall prevention in Korea. *Korean J Intern Med*. 2017;32(1):199-210.

21. U. S. Preventive Services Task Force. Interventions to Prevent Falls in Community-Dwelling Older Adults: US Preventive Services Task Force Recommendation Statement. *JAMA*. 2018;319(16):1696-704.
22. NICE. Falls in Older People: Assessing Risk and Prevention. 2013.
23. Stevens JA, Phelan EA. Development of STEADI: A Fall Prevention Resource for Health Care Providers. *Health Promotion Practice*. 2012 2013/09/01;14(5):706-14.
24. Delbaere K, Close JC, Brodaty H, Sachdev P, Lord SR. Determinants of disparities between perceived and physiological risk of falling among elderly people: cohort study. *BMJ*. 2010 Aug 18;341:c4165.
25. Delbaere K, Close JC, Mikolaizak AS, Sachdev PS, Brodaty H, Lord SR. The falls efficacy scale international (FES-I). A comprehensive longitudinal validation study. *Age and ageing*. 2010;39(2):210-6.
26. Delbaere K, Close JC, Taylor M, Wesson J, Lord SR. Validation of the Iconographical Falls Efficacy Scale in cognitively impaired older people. *The journals of gerontology Series A, Biological sciences and medical sciences*. 2013 Sep;68(9):1098-102.
27. Delbaere K, Crombez G, Vanderstraeten G, Willems T, Cambier D. Fear-related avoidance of activities, falls and physical frailty. A prospective community-based cohort study. *Age and Ageing*. 2004;33(4):368-73.
28. Friedman SM, Munoz B, West SK, Rubin GS, Fried LP. Falls and fear of falling: which comes first? A longitudinal prediction model suggests strategies for primary and secondary prevention. *J Am Geriatr Soc*. 2002 Aug;50(8):1329-35.
29. Lim ML, van Schooten KS, Radford KA, Menant J, Lord SR, Sachdev PS, et al. The Iconographical Falls Efficacy Scale (IconFES) in community-dwelling older people—a longitudinal validation study. *Age and ageing*. 2021;50(3):822-9.
30. Souza AQd, Pegorari MS, Nascimento JS, Oliveira PBd, Tavares DMdS. Incidence and predictive factors of falls in community-dwelling elderly: a longitudinal study. *Ciencia & saude coletiva*. 2019;24 9:3507-16.
31. Weijer RHA, Hoozemans MJM, Meijer OG, van Dieën JH, Pijnappels M. The short- and long-term temporal relation between falls and concern about falling in older adults without a recent history of falling. *PloS one*. 2021;16(7):e0253374.
32. Clemson L, Kendig H, Mackenzie L, Browning C. Predictors of injurious falls and fear of falling differ: an 11-year longitudinal study of incident events in older people. *Journal of aging and health*. 2015 Mar;27(2):239-56.
33. Lavedan A, Viladrosa M, Jurschik P, Botigue T, Nuin C, Masot O, et al. Fear of falling in community-dwelling older adults: A cause of falls, a consequence, or both? *PloS one*. 2018;13(3):e0194967.
34. Allali G, Ayers EI, Holtzer R, Verghese J. The role of postural instability/gait difficulty and fear of falling in predicting falls in non-demented older adults. *Archives of gerontology and geriatrics*. 2017 Mar - Apr;69:15-20.
35. Litwin H, Erlich B, Dunsky A. The Complex Association Between Fear of Falling and Mobility Limitation in Relation to Late-Life Falls: A SHARE-Based Analysis. *Journal of aging and health*. 2018 Jul;30(6):987-1008.
36. Gazibara T, Kurtagic I, Kistic-Tepavcevic D, Nurkovic S, Kovacevic N, Gazibara T, et al. Falls, risk factors and fear of falling among persons older than 65 years of age. *Psychogeriatrics*. [<https://doi.org/10.1111/psyg.12217>]. 2017 2017/07/01;17(4):215-23.
37. Young WR, Mark Williams A. How fear of falling can increase fall-risk in older adults: Applying psychological theory to practical observations. *Gait & Posture*. 2015 2015/01/01;41(1):7-12.
38. Hadjistavropoulos T, Delbaere K, Fitzgerald TD. Reconceptualizing the Role of Fear of Falling and Balance Confidence in Fall Risk. *Journal of aging and health*. 2011;23(1):3-23.
39. Delbaere K, Sturnieks DL, Crombez G, Lord SR. Concern about falls elicits changes in gait parameters in conditions of postural threat in older people. *Journals of Gerontology - Series A Biological Sciences and Medical Sciences*. [Article]. 2009;64(2):237-42.
40. Herman T, Giladi N, Gurevich T, Hausdorff JM. Gait instability and fractal dynamics of older adults with a "cautious" gait: Why do certain older adults walk fearfully? *Gait and Posture*. [Article]. 2005;21(2):178-85.

41. Menz HB, Lord SR, Fitzpatrick RC. A structural equation model relating impaired sensorimotor function, fear of falling and gait patterns in older people. *Gait and Posture*. [Article]. 2007;25(2):243-9.
42. Jørstad EC, Hauer K, Becker C, Lamb SE, on behalf of the ProFa NEG. Measuring the Psychological Outcomes of Falling: A Systematic Review. *Journal of the American Geriatrics Society*. [<https://doi.org/10.1111/j.1532-5415.2005.53172.x>]. 2005 2005/03/01;53(3):501-10.
43. Hill KD, Schwarz Ja Fau - Kalogeropoulos AJ, Kalogeropoulos Aj Fau - Gibson SJ, Gibson SJ. Fear of falling revisited. *Arch Phys Med Rehabil*. 1996;77(10).
44. Powell LE, Myers AM. The Activities-specific Balance Confidence (ABC) Scale. *The Journals of Gerontology: Series A: Biological Sciences and Medical Sciences*. 1995;50(1):M28-M34.
45. Lachman ME, Howland J, Tennstedt S, Jette A, Assmann S, Peterson EW. Fear of Falling and Activity Restriction: The Survey of Activities and Fear of Falling in the Elderly (SAFE). *The Journals of Gerontology: Series B*. 1998;53B(1):P43-P50.
46. Yardley L, Smith H. A prospective study of the relationship between feared consequences of falling and avoidance of activity in community-living older people. *Gerontologist*. 2002;42(1):17-23.
47. Kumar A, Delbaere K, Zijlstra GAR, Carpenter H, Iliffe S, Masud T, et al. Exercise for reducing fear of falling in older people living in the community: Cochrane systematic review and meta-analysis. *Age and Ageing*. 2016;45(3):345-52.
48. Hauer KA, Kempen GI, Schwenk M, Yardley L, Beyer N, Todd C, et al. Validity and sensitivity to change of the falls efficacy scales international to assess fear of falling in older adults with and without cognitive impairment. *Gerontology*. 2011;57(5):462-72.
